# Supplementary material for: Accuracy of Across-Environment Genome-Wide Prediction in Maize Nested Association Mapping Populations
Source: PubMed Central journal article supplement (PMC3564986; doi:10.1534/g3.112.005066), 2013-02-01
Supplement: supp_3.2.263_005066SI.pdf [file supp_3.2.263_005066SI.pdf]

**Accuracy of Across-environment Genome-wide Prediction in Maize Nested Association Mapping Populations**

Zhigang Guo<sup>\*1</sup>, Dominic M. Tucker<sup>§</sup>, Daolong Wang<sup>\*</sup>, Christopher J. Basten<sup>\*</sup>, Elhan Ersoz<sup>\*\*</sup>, William H. Briggs<sup>§§</sup>, Jianwei Lu<sup>\*</sup>, Min Li<sup>\*</sup>, and Gilles Gay<sup>\*</sup>

**Address:**

<sup>\*</sup>Syngenta Biotechnology, Inc., 3054 E Cornwallis Rd., Research Triangle Park, NC 27709, USA

<sup>§</sup>Syngenta, Inc., 12101 Thorps Road, Clinton, IL 61727, USA

<sup>\*\*</sup>Syngenta, Inc., 317 330<sup>th</sup> Street, Stanton, MN 55018, USA

<sup>§§</sup>Syngenta Seeds B.V., Westeinde 62, 1601 BK Enkhuizen, The Netherlands

1 *Corresponding Author:* Syngenta Biotechnology, Inc., 3054 E Cornwallis Rd., Research Triangle Park, NC 27709, USA. E-mail:

zhigang.guo@syngenta.com

**Method for estimation of variance components and broad sense heritability ( $H^2$ )**

In this study, variance components and the broad sense heritability on the mean basis were analyzed for each NAM population and trait using phenotypic data from two locations (AU and CU) and two years (2006 and 2007) based on the following mixed model

$$y_{ijk} = \mu + G_i + L_j + Y_k + L_j \times Y_k + G_i \times L_j + G_i \times Y_k + e_{ijk},$$

where  $y_{ijk}$  is the phenotypic value of line  $i$  at location  $j$  and year  $k$ ,  $\mu$  is the overall mean of the phenotype,  $G_i$  is the genotypic effect of the line  $i$  ( $i = 1, 2, \dots, N$ ),  $L_j$  ( $j = 1, 2$ ) is the location effect,  $Y_k$  ( $k = 1, 2$ ) is the year effect,  $L_j \times Y_k$  is the interaction effect between location  $j$  and year  $k$ ,  $G_i \times L_j$  is the interaction effect between genotype  $i$  and location  $j$ ,  $G_i \times Y_k$  is the interaction effect between genotype  $i$  and year  $k$ , and  $e_{ijk}$  is the residual error following a normal distribution  $N(0, V_E)$ . It was assumed that  $G_i$ ,  $L_j$  and  $Y_k$  were random effects, following  $N(0, V_G)$ ,  $N(0, V_L)$ , and  $N(0, V_Y)$ . Based on these assumptions, the interaction terms  $G_i \times L_j$  and  $G_i \times Y_k$  were also random effects, following  $N(0, V_{G \times L})$  and  $N(0, V_{G \times Y})$ , respectively. The variance components  $V_G$ ,  $V_L$ ,  $V_Y$ ,  $V_{G \times L}$ ,  $V_{G \times Y}$ , and  $V_E$  were estimated using SAS PROC mixed. Given these variance components, the broad sense heritability  $H^2$  on entry mean basis was estimated as  $H^2 = V_G / (V_G + V_{G \times L} / 2 + V_{G \times Y} / 2 + V_E / 4)$ .

**Table S1 Variance components for traits LL and LW based on 25 NAM populations**

| PopId | LL      |         |                |                |               |               |       | LW    |       |              |              |             |             |       |
|-------|---------|---------|----------------|----------------|---------------|---------------|-------|-------|-------|--------------|--------------|-------------|-------------|-------|
|       | $V_G$   | $V_E$   | $V_L$          | $V_Y$          | $V_{GL}$      | $V_{GY}$      | $H^2$ | $V_G$ | $V_E$ | $V_L$        | $V_Y$        | $V_{GL}$    | $V_{GY}$    | $H^2$ |
| 1     | 3712.69 | 3415.65 | <b>24.84</b>   | <b>5.32</b>    | <b>0.00</b>   | 570.36        | 0.77  | 49.15 | 85.97 | <b>12.87</b> | <b>0.00</b>  | <b>0.00</b> | <b>0.12</b> | 0.70  |
| 2     | 2828.92 | 3184.92 | <b>229.33</b>  | <b>0.00</b>    | <b>0.00</b>   | <b>0.00</b>   | 0.78  | 86.33 | 84.06 | <b>0.95</b>  | <b>1.57</b>  | <b>0.00</b> | <b>0.58</b> | 0.80  |
| 3     | 1899.01 | 3922.08 | <b>0.00</b>    | <b>4.60</b>    | <b>186.65</b> | <b>363.68</b> | 0.60  | 86.55 | 90.13 | <b>0.20</b>  | <b>3.44</b>  | <b>0.00</b> | <b>3.10</b> | 0.78  |
| 4     | 3117.24 | 2906.74 | <b>82.00</b>   | <b>132.28</b>  | <b>101.53</b> | <b>0.00</b>   | 0.80  | 42.18 | 58.18 | <b>5.95</b>  | <b>0.00</b>  | <b>0.00</b> | <b>0.00</b> | 0.74  |
| 5     | 2640.95 | 2618.83 | <b>606.87</b>  | <b>20.66</b>   | <b>266.01</b> | <b>0.00</b>   | 0.77  | 53.61 | 57.78 | <b>2.28</b>  | <b>0.00</b>  | <b>1.00</b> | <b>0.00</b> | 0.78  |
| 6     | 2394.58 | 3030.18 | <b>17.28</b>   | <b>91.56</b>   | <b>185.98</b> | <b>0.00</b>   | 0.74  | 30.49 | 89.14 | <b>1.92</b>  | <b>0.00</b>  | <b>0.00</b> | <b>0.00</b> | 0.58  |
| 7     | 2693.34 | 2201.03 | <b>90.44</b>   | <b>401.90</b>  | <b>53.80</b>  | <b>0.00</b>   | 0.82  | 80.22 | 72.46 | <b>0.80</b>  | <b>16.53</b> | <b>0.00</b> | <b>0.00</b> | 0.82  |
| 8     | 2643.83 | 2778.52 | <b>8.20</b>    | <b>317.28</b>  | <b>0.00</b>   | <b>336.46</b> | 0.75  | 41.57 | 64.57 | <b>0.89</b>  | <b>4.29</b>  | <b>0.00</b> | <b>0.00</b> | 0.72  |
| 9     | 2202.03 | 3048.93 | <b>36.66</b>   | <b>394.20</b>  | <b>10.21</b>  | <b>0.00</b>   | 0.74  | 55.58 | 78.83 | <b>5.55</b>  | <b>1.37</b>  | <b>0.00</b> | <b>0.00</b> | 0.74  |
| 10    | 2841.07 | 2128.14 | <b>28.96</b>   | <b>136.27</b>  | <b>0.00</b>   | <b>63.59</b>  | 0.83  | 64.56 | 50.93 | <b>0.69</b>  | <b>4.66</b>  | <b>1.58</b> | <b>7.40</b> | 0.79  |
| 11    | 2923.63 | 3782.49 | <b>0.00</b>    | <b>223.94</b>  | <b>357.97</b> | <b>0.00</b>   | 0.72  | 38.51 | 89.52 | <b>12.38</b> | <b>4.27</b>  | <b>0.00</b> | <b>0.00</b> | 0.63  |
| 12    | 3043.85 | 2414.63 | <b>195.07</b>  | <b>198.70</b>  | 414.83        | <b>0.00</b>   | 0.79  | 54.25 | 71.07 | <b>0.48</b>  | <b>0.33</b>  | <b>2.64</b> | <b>0.00</b> | 0.74  |
| 13    | 3096.70 | 2391.68 | <b>380.26</b>  | <b>38.62</b>   | <b>0.00</b>   | <b>0.00</b>   | 0.84  | 60.14 | 68.16 | <b>17.25</b> | <b>0.00</b>  | <b>0.00</b> | <b>0.00</b> | 0.78  |
| 14    | 2432.85 | 2367.77 | <b>10.74</b>   | <b>457.33</b>  | <b>0.00</b>   | <b>165.20</b> | 0.78  | 49.85 | 53.55 | <b>0.25</b>  | <b>0.03</b>  | <b>0.00</b> | <b>0.00</b> | 0.79  |
| 15    | 2872.87 | 2381.87 | <b>0.00</b>    | <b>43.40</b>   | <b>259.27</b> | <b>215.36</b> | 0.78  | 62.33 | 85.35 | <b>0.84</b>  | <b>0.25</b>  | <b>0.00</b> | 6.75        | 0.72  |
| 16    | 1949.81 | 3066.43 | <b>0.00</b>    | <b>686.50</b>  | <b>0.00</b>   | <b>0.00</b>   | 0.72  | 60.48 | 78.03 | <b>0.99</b>  | <b>12.48</b> | <b>0.00</b> | <b>2.92</b> | 0.74  |
| 17    | 1605.53 | 3316.92 | <b>1388.21</b> | <b>247.90</b>  | <b>220.81</b> | <b>0.00</b>   | 0.63  | 71.48 | 53.51 | <b>0.00</b>  | <b>14.17</b> | <b>0.00</b> | 5.12        | 0.82  |
| 18    | 1195.92 | 2718.24 | <b>86.83</b>   | <b>104.09</b>  | <b>81.95</b>  | <b>0.00</b>   | 0.62  | 26.61 | 68.20 | <b>0.33</b>  | <b>5.75</b>  | <b>0.00</b> | <b>1.53</b> | 0.60  |
| 19    | 2329.66 | 3426.67 | <b>121.82</b>  | <b>0.00</b>    | <b>194.02</b> | 521.18        | 0.66  | 55.51 | 55.54 | <b>1.95</b>  | <b>0.00</b>  | <b>1.42</b> | <b>0.00</b> | 0.79  |
| 20    | 2076.13 | 1945.32 | <b>364.59</b>  | <b>95.58</b>   | <b>50.04</b>  | 513.25        | 0.73  | 59.99 | 59.68 | <b>0.00</b>  | <b>0.97</b>  | <b>0.00</b> | <b>0.00</b> | 0.80  |
| 21    | 3077.63 | 2317.01 | <b>0.00</b>    | <b>0.00</b>    | <b>32.56</b>  | <b>0.00</b>   | 0.84  | 44.40 | 64.85 | <b>0.98</b>  | <b>6.78</b>  | 11.19       | <b>0.00</b> | 0.67  |
| 22    | 1987.63 | 2808.07 | <b>235.30</b>  | <b>1353.64</b> | <b>152.09</b> | 468.61        | 0.66  | 66.60 | 94.38 | <b>0.04</b>  | <b>29.04</b> | <b>6.41</b> | <b>0.00</b> | 0.71  |
| 23    | 2171.32 | 3692.89 | <b>76.03</b>   | <b>11.10</b>   | <b>0.00</b>   | <b>0.00</b>   | 0.70  | 49.86 | 70.49 | <b>0.36</b>  | <b>18.46</b> | <b>1.59</b> | <b>0.00</b> | 0.73  |
| 24    | 2489.81 | 3212.06 | <b>0.00</b>    | 950.74         | <b>0.00</b>   | <b>0.00</b>   | 0.76  | 58.50 | 53.30 | <b>0.16</b>  | <b>2.97</b>  | <b>3.58</b> | <b>0.00</b> | 0.79  |
| 25    | 2212.55 | 2730.97 | 301.91         | 641.40         | 352.19        | <b>137.16</b> | 0.70  | 58.45 | 61.95 | <b>0.14</b>  | 6.18         | <b>0.00</b> | <b>0.00</b> | 0.79  |
| Mean  | 2497.58 | 2872.32 | 171.41         | 262.28         | 116.80        | 134.19        | 0.74  | 56.29 | 70.39 | 2.73         | 5.34         | 1.18        | 1.10        | 0.74  |

Bold in the table indicates the variance component is not significant at  $\alpha = 0.05$ .

**Table S2** Estimates of empirical LOD thresholds of CIM based on permutation tests

| Approach | LL         |            | LW         |            |
|----------|------------|------------|------------|------------|
|          | SE         | ME         | SE         | ME         |
| WP       | 2.85(0.08) | 5.25(0.09) | 2.90(0.07) | 5.30(0.08) |
| AP       | 3.10       | 6.15       | 3.13       | 6.22       |

For WP-SE, the average of LOD thresholds across 25 NAM populations is illustrated and used for QTL identification with CIM, and in the parenthesis is standard deviation (SD) for LOD threshold estimates across 25 populations

**Table S3 Estimates of genetic and residual covariance and correlation (in the lower diagonal) based on individual NAM populations 1 – 10**

|       |      | LL                 |        |        |        |                     |        |        |        | LW                 |      |      |      |                     |      |       |      |
|-------|------|--------------------|--------|--------|--------|---------------------|--------|--------|--------|--------------------|------|------|------|---------------------|------|-------|------|
|       |      | Genetic covariance |        |        |        | Residual covariance |        |        |        | Genetic covariance |      |      |      | Residual covariance |      |       |      |
| Popld | Envi | E1                 | E2     | E3     | E4     | E1                  | E2     | E3     | E4     | E1                 | E2   | E3   | E4   | E1                  | E2   | E3    | E4   |
| 1     | E1   | 1038.6             | 1107.1 | 958.5  | 959.7  | 6397.5              | 700.9  | 1076.7 | 1196.0 | 22.3               | 15.2 | 13.7 | 24.5 | 155.0               | 17.7 | 22.6  | 18.0 |
|       | E2   | 0.78               | 1927.2 | 1460.7 | 1500.4 | 0.21                | 1793.2 | 593.7  | 638.0  | 0.70               | 21.2 | 14.2 | 22.6 | 0.18                | 60.3 | 8.9   | 12.6 |
|       | E3   | 0.78               | 0.88   | 1446.4 | 1385.8 | 0.20                | 0.21   | 4380.9 | 1013.4 | 0.76               | 0.81 | 14.4 | 16.3 | 0.18                | 0.12 | 96.6  | 14.8 |
|       | E4   | 0.76               | 0.88   | 0.93   | 1526.6 | 0.21                | 0.21   | 0.21   | 5184.2 | 0.99               | 0.94 | 0.82 | 27.2 | 0.19                | 0.21 | 0.20  | 58.4 |
| 2     | E1   | 545.9              | 514.1  | 489.3  | 451.8  | 6560.8              | 1651.7 | 2176.5 | 1953.7 | 40.9               | 29.0 | 29.8 | 27.1 | 193.0               | 34.3 | 26.4  | 38.0 |
|       | E2   | 0.66               | 1125.4 | 766.9  | 837.0  | 0.41                | 2483.8 | 1345.4 | 1217.4 | 0.93               | 24.0 | 23.7 | 21.7 | 0.28                | 79.5 | 17.0  | 30.3 |
|       | E3   | 0.57               | 0.62   | 1362.7 | 766.3  | 0.40                | 0.41   | 4424.8 | 1584.9 | 0.90               | 0.93 | 26.8 | 22.7 | 0.22                | 0.22 | 76.3  | 25.4 |
|       | E4   | 0.60               | 0.77   | 0.64   | 1043.2 | 0.41                | 0.42   | 0.41   | 3429.8 | 0.86               | 0.90 | 0.89 | 24.2 | 0.33                | 0.41 | 0.35  | 69.3 |
| 3     | E1   | 767.2              | 352.2  | 426.1  | 160.5  | 6004.0              | 1815.0 | 2026.1 | 1729.6 | 72.3               | 43.2 | 25.5 | 35.5 | 127.2               | 19.7 | 39.2  | 24.3 |
|       | E2   | 0.56               | 523.3  | 216.3  | 135.9  | 0.35                | 4491.1 | 1735.4 | 1504.6 | 0.88               | 33.7 | 22.0 | 28.9 | 0.23                | 57.6 | 14.7  | 19.7 |
|       | E3   | 0.59               | 0.36   | 684.8  | 376.3  | 0.35                | 0.34   | 5663.1 | 1670.5 | 0.74               | 0.93 | 16.6 | 19.4 | 0.31                | 0.17 | 127.9 | 31.5 |
|       | E4   | 0.26               | 0.26   | 0.63   | 515.1  | 0.35                | 0.35   | 0.35   | 4082.0 | 0.84               | 0.99 | 0.95 | 25.4 | 0.22                | 0.26 | 0.28  | 96.5 |
| 4     | E1   | 1595.5             | 1091.4 | 1201.5 | 1301.4 | 3903.4              | 889.7  | 1143.3 | 1160.5 | 21.0               | 15.6 | 8.9  | 18.9 | 85.1                | 10.8 | 16.9  | 11.2 |
|       | E2   | 0.74               | 1363.8 | 1182.9 | 1348.0 | 0.33                | 1828.2 | 808.4  | 807.9  | 0.89               | 14.7 | 8.8  | 17.2 | 0.22                | 29.4 | 11.9  | 10.7 |
|       | E3   | 0.72               | 0.77   | 1746.1 | 1369.4 | 0.33                | 0.34   | 3141.9 | 988.2  | 0.84               | 0.99 | 5.3  | 10.7 | 0.21                | 0.25 | 77.8  | 15.4 |
|       | E4   | 0.78               | 0.87   | 0.78   | 1751.5 | 0.33                | 0.34   | 0.32   | 3100.5 | 0.88               | 0.96 | 0.99 | 21.8 | 0.16                | 0.26 | 0.23  | 55.8 |
| 5     | E1   | 718.2              | 693.8  | 823.1  | 605.4  | 3447.5              | 915.5  | 1391.7 | 1276.8 | 11.9               | 11.4 | 10.6 | 15.9 | 108.0               | 22.8 | 44.7  | 30.3 |
|       | E2   | 0.75               | 1206.1 | 943.4  | 821.1  | 0.37                | 1802.2 | 991.2  | 956.8  | 0.86               | 14.7 | 15.8 | 19.7 | 0.41                | 28.4 | 20.9  | 15.5 |
|       | E3   | 0.73               | 0.64   | 1790.9 | 877.2  | 0.37                | 0.37   | 4060.1 | 1392.7 | 0.65               | 0.87 | 22.6 | 21.5 | 0.41                | 0.37 | 110.7 | 29.4 |
|       | E4   | 0.73               | 0.76   | 0.67   | 963.6  | 0.36                | 0.38   | 0.37   | 3563.5 | 0.82               | 0.92 | 0.81 | 31.4 | 0.40                | 0.40 | 0.38  | 53.9 |
| 6     | E1   | 1248.4             | 909.1  | 944.9  | 874.5  | 3144.4              | 1001.7 | 1134.8 | 1055.9 | 18.8               | 8.9  | 12.8 | 14.1 | 109.0               | 9.3  | 11.2  | 9.8  |
|       | E2   | 0.68               | 1454.5 | 764.3  | 956.2  | 0.35                | 2592.1 | 1006.6 | 982.0  | 0.64               | 10.4 | 7.0  | 5.8  | 0.10                | 73.4 | 9.3   | 10.0 |
|       | E3   | 0.87               | 0.65   | 952.3  | 843.9  | 0.35                | 0.34   | 3392.5 | 1092.8 | 0.71               | 0.52 | 17.3 | 13.7 | 0.12                | 0.12 | 81.7  | 11.6 |
|       | E4   | 0.75               | 0.76   | 0.83   | 1092.3 | 0.34                | 0.35   | 0.34   | 3079.2 | 0.93               | 0.51 | 0.94 | 12.2 | 0.12                | 0.15 | 0.16  | 65.0 |
| 7     | E1   | 1281.0             | 882.0  | 1057.2 | 1233.8 | 2408.2              | 600.7  | 773.0  | 606.7  | 29.6               | 31.0 | 24.8 | 33.8 | 98.7                | 19.4 | 21.1  | 20.9 |
|       | E2   | 0.86               | 815.7  | 802.5  | 1051.2 | 0.28                | 1903.5 | 674.4  | 562.0  | 0.94               | 37.0 | 24.8 | 39.0 | 0.24                | 63.9 | 26.8  | 15.2 |
|       | E3   | 0.83               | 0.78   | 1283.1 | 1240.9 | 0.28                | 0.28   | 3085.2 | 697.0  | 0.99               | 0.89 | 21.3 | 30.0 | 0.22                | 0.35 | 94.5  | 9.8  |

|    |    |        |        |        |        |        |        |        |        |      |      |      |      |       |      |      |      |
|----|----|--------|--------|--------|--------|--------|--------|--------|--------|------|------|------|------|-------|------|------|------|
|    | E4 | 0.81   | 0.87   | 0.82   | 1791.4 | 0.28   | 0.29   | 0.28   | 1985.8 | 0.95 | 0.98 | 0.99 | 42.8 | 0.28  | 0.25 | 0.13 | 58.5 |
| 8  | E1 | 1103.5 | 869.4  | 696.9  | 834.2  | 3801.7 | 1592.2 | 1779.6 | 1405.0 | 11.9 | 8.9  | 13.7 | 9.5  | 112.3 | 30.5 | 18.1 | 24.1 |
|    | E2 | 0.69   | 1451.4 | 765.1  | 818.9  | 0.43   | 3556.5 | 1715.7 | 1318.3 | 0.80 | 10.3 | 10.3 | 8.5  | 0.31  | 86.0 | 12.9 | 22.0 |
|    | E3 | 0.57   | 0.55   | 1359.0 | 862.1  | 0.43   | 0.42   | 4620.6 | 1545.3 | 0.88 | 0.71 | 20.4 | 11.4 | 0.23  | 0.19 | 56.3 | 13.1 |
|    | E4 | 0.79   | 0.68   | 0.74   | 1011.5 | 0.44   | 0.42   | 0.43   | 2749.9 | 0.82 | 0.85 | 0.75 | 11.3 | 0.31  | 0.32 | 0.24 | 54.6 |
| 9  | E1 | 747.8  | 479.2  | 686.4  | 603.7  | 2915.3 | 1007.4 | 1334.3 | 1373.2 | 5.3  | 9.6  | 9.3  | 10.4 | 161.2 | 17.4 | 20.2 | 19.7 |
|    | E2 | 0.62   | 802.0  | 567.7  | 578.8  | 0.40   | 2229.4 | 1141.7 | 1228.9 | 0.72 | 34.7 | 22.9 | 19.3 | 0.18  | 56.2 | 15.8 | 9.4  |
|    | E3 | 0.75   | 0.60   | 1134.5 | 869.7  | 0.39   | 0.38   | 4005.1 | 1608.7 | 0.80 | 0.77 | 25.7 | 12.7 | 0.18  | 0.24 | 76.1 | 12.6 |
|    | E4 | 0.64   | 0.59   | 0.75   | 1195.1 | 0.39   | 0.40   | 0.39   | 4303.9 | 0.62 | 0.86 | 0.34 | 52.9 | 0.19  | 0.16 | 0.18 | 64.8 |
| 10 | E1 | 1184.2 | 1040.6 | 975.7  | 787.3  | 2403.3 | 1083.1 | 1457.7 | 1187.1 | 20.8 | 15.9 | 23.1 | 20.4 | 95.7  | 34.7 | 22.8 | 15.9 |
|    | E2 | 0.82   | 1377.4 | 1035.8 | 938.8  | 0.48   | 2132.2 | 1377.2 | 1075.3 | 0.66 | 27.9 | 32.2 | 15.5 | 0.40  | 78.7 | 14.8 | 19.1 |
|    | E3 | 0.78   | 0.77   | 1323.6 | 930.3  | 0.47   | 0.47   | 3963.7 | 1481.9 | 0.74 | 0.90 | 46.6 | 30.2 | 0.29  | 0.21 | 64.8 | 15.6 |
|    | E4 | 0.66   | 0.73   | 0.74   | 1192.8 | 0.48   | 0.46   | 0.47   | 2549.0 | 0.89 | 0.49 | 0.75 | 35.1 | 0.25  | 0.33 | 0.30 | 43.2 |

---

Envi: environment

**Table S4 Estimates of genetic and residual covariances and correlations (in the lower diagonal) based on individual NAM populations 11 – 20**

|       |      | LL                 |        |        |        |                     |        |        |        | LW                 |      |      |      |                     |      |       |      |
|-------|------|--------------------|--------|--------|--------|---------------------|--------|--------|--------|--------------------|------|------|------|---------------------|------|-------|------|
|       |      | Genetic covariance |        |        |        | Residual covariance |        |        |        | Genetic covariance |      |      |      | Residual covariance |      |       |      |
| Popld | Envi | E1                 | E2     | E3     | E4     | E1                  | E2     | E3     | E4     | E1                 | E2   | E3   | E4   | E1                  | E2   | E3    | E4   |
| 11    | E1   | 1477.8             | 995.6  | 1208.6 | 1038.0 | 5423.9              | 734.5  | 904.8  | 1294.2 | 22.7               | 13.8 | 18.2 | 20.7 | 93.7                | 2.8  | 5.3   | 4.0  |
|       | E2   | 0.78               | 1090.6 | 880.4  | 956.9  | 0.22                | 2096.7 | 551.5  | 809.9  | 0.72               | 16.0 | 15.4 | 18.9 | 0.04                | 51.0 | 4.0   | 7.5  |
|       | E3   | 0.84               | 0.71   | 1419.1 | 973.4  | 0.22                | 0.22   | 3096.9 | 978.2  | 0.89               | 0.90 | 18.4 | 19.8 | 0.07                | 0.07 | 63.3  | 5.0  |
|       | E4   | 0.78               | 0.84   | 0.75   | 1196.9 | 0.22                | 0.22   | 0.22   | 6486.6 | 0.88               | 0.95 | 0.93 | 24.7 | 0.05                | 0.14 | 0.08  | 58.4 |
| 12    | E1   | 1842.3             | 1351.7 | 1272.0 | 1598.7 | 3464.1              | 907.2  | 1383.5 | 1123.5 | 35.2               | 24.6 | 20.7 | 24.2 | 81.4                | 12.4 | 23.4  | 17.8 |
|       | E2   | 0.86               | 1330.3 | 1000.0 | 1460.9 | 0.37                | 1785.6 | 939.0  | 800.1  | 0.83               | 25.0 | 13.9 | 22.5 | 0.21                | 43.9 | 7.8   | 8.7  |
|       | E3   | 0.85               | 0.78   | 1223.1 | 1194.3 | 0.37                | 0.35   | 3973.9 | 1185.4 | 0.95               | 0.76 | 13.5 | 14.9 | 0.24                | 0.11 | 117.8 | 17.6 |
|       | E4   | 0.83               | 0.89   | 0.76   | 2015.1 | 0.36                | 0.36   | 0.35   | 2833.8 | 0.84               | 0.92 | 0.83 | 23.8 | 0.27                | 0.18 | 0.22  | 52.2 |
| 13    | E1   | 1157.0             | 820.0  | 1085.7 | 561.1  | 2534.7              | 1538.2 | 1589.9 | 2216.2 | 44.6               | 20.8 | 21.8 | 27.3 | 89.9                | 31.5 | 28.3  | 18.7 |
|       | E2   | 0.79               | 926.8  | 1079.4 | 635.1  | 0.61                | 2482.2 | 1508.1 | 2118.0 | 0.72               | 18.7 | 12.5 | 22.4 | 0.43                | 59.0 | 32.6  | 17.3 |
|       | E3   | 0.79               | 0.88   | 1618.3 | 638.2  | 0.58                | 0.56   | 2922.8 | 2239.8 | 0.89               | 0.78 | 13.6 | 17.1 | 0.32                | 0.45 | 88.0  | 23.9 |
|       | E4   | 0.69               | 0.87   | 0.66   | 579.5  | 0.61                | 0.59   | 0.58   | 5145.9 | 0.87               | 1.00 | 0.98 | 22.3 | 0.22                | 0.25 | 0.29  | 79.5 |
| 14    | E1   | 1044.0             | 1056.3 | 541.5  | 712.2  | 3710.3              | 1648.1 | 1699.0 | 1545.3 | 21.6               | 17.1 | 13.6 | 19.1 | 60.6                | 21.4 | 16.2  | 22.6 |
|       | E2   | 0.80               | 1660.8 | 665.6  | 973.8  | 0.51                | 2809.6 | 1441.5 | 1360.5 | 0.93               | 15.6 | 12.9 | 15.1 | 0.29                | 88.9 | 26.7  | 16.2 |
|       | E3   | 0.68               | 0.66   | 607.9  | 521.3  | 0.50                | 0.48   | 3177.0 | 1443.4 | 0.80               | 0.89 | 13.5 | 15.1 | 0.22                | 0.30 | 86.7  | 20.1 |
|       | E4   | 0.70               | 0.76   | 0.67   | 995.7  | 0.49                | 0.50   | 0.50   | 2680.9 | 0.98               | 0.92 | 0.98 | 17.5 | 0.42                | 0.25 | 0.31  | 48.3 |
| 15    | E1   | 1116.9             | 701.5  | 432.1  | 712.4  | 5458.0              | 1562.6 | 2514.5 | 2265.9 | 29.7               | 18.9 | 15.2 | 25.0 | 209.5               | 22.0 | 32.3  | 28.5 |
|       | E2   | 0.76               | 761.6  | 505.7  | 723.7  | 0.49                | 1846.1 | 1451.3 | 1417.0 | 0.77               | 20.4 | 18.6 | 25.5 | 0.25                | 35.9 | 8.1   | 13.3 |
|       | E3   | 0.52               | 0.73   | 626.9  | 613.2  | 0.49                | 0.48   | 4888.6 | 2165.8 | 0.54               | 0.80 | 26.4 | 30.3 | 0.24                | 0.14 | 89.1  | 22.6 |
|       | E4   | 0.68               | 0.84   | 0.79   | 970.6  | 0.48                | 0.52   | 0.49   | 4079.6 | 0.77               | 0.94 | 0.99 | 35.7 | 0.24                | 0.27 | 0.29  | 70.4 |
| 16    | E1   | 750.8              | 418.4  | 556.6  | 387.0  | 3625.6              | 1213.3 | 1309.3 | 1502.7 | 36.9               | 27.9 | 25.6 | 35.2 | 121.8               | 8.3  | 7.3   | 8.4  |
|       | E2   | 0.62               | 614.7  | 441.7  | 418.7  | 0.38                | 2802.1 | 1151.5 | 1343.1 | 0.79               | 33.9 | 22.5 | 31.9 | 0.10                | 54.0 | 7.4   | 6.4  |
|       | E3   | 0.67               | 0.59   | 924.5  | 429.5  | 0.37                | 0.37   | 3396.9 | 1410.2 | 0.98               | 0.90 | 18.5 | 25.2 | 0.07                | 0.11 | 87.8  | 12.8 |
|       | E4   | 0.67               | 0.80   | 0.67   | 451.7  | 0.38                | 0.39   | 0.37   | 4257.6 | 0.97               | 0.92 | 0.98 | 35.7 | 0.10                | 0.12 | 0.18  | 55.9 |
| 17    | E1   | 585.4              | 119.0  | 414.2  | 386.1  | 3786.1              | 1236.2 | 1156.0 | 1077.8 | 36.4               | 34.5 | 22.6 | 35.2 | 62.6                | 10.4 | 15.7  | 16.7 |
|       | E2   | 0.34               | 210.5  | 136.6  | 285.0  | 0.30                | 4471.4 | 1226.4 | 1175.0 | 0.94               | 37.0 | 25.1 | 40.1 | 0.20                | 45.2 | 15.2  | 9.5  |
|       | E3   | 0.75               | 0.41   | 526.9  | 499.8  | 0.30                | 0.29   | 3945.9 | 1067.2 | 0.83               | 0.91 | 20.5 | 27.6 | 0.21                | 0.24 | 85.8  | 25.2 |

|    |    |        |        |        |        |        |        |        |        |      |      |      |      |      |      |      |      |
|----|----|--------|--------|--------|--------|--------|--------|--------|--------|------|------|------|------|------|------|------|------|
|    | E4 | 0.59   | 0.73   | 0.81   | 720.8  | 0.31   | 0.31   | 0.30   | 3305.8 | 0.87 | 0.99 | 0.91 | 44.7 | 0.26 | 0.17 | 0.34 | 65.3 |
| 18 | E1 | 741.1  | 316.8  | 168.0  | 257.1  | 2964.9 | 994.9  | 1188.7 | 1167.9 | 26.1 | 15.7 | 8.8  | 9.5  | 82.3 | 5.9  | 5.5  | 7.0  |
|    | E2 | 0.61   | 366.0  | 191.7  | 278.7  | 0.36   | 2524.1 | 1079.0 | 1068.2 | 0.93 | 11.0 | 9.2  | 7.3  | 0.08 | 64.3 | 8.2  | 5.6  |
|    | E3 | 0.38   | 0.62   | 258.9  | 158.5  | 0.36   | 0.35   | 3702.0 | 1267.1 | 0.50 | 0.80 | 12.0 | 7.4  | 0.07 | 0.13 | 67.6 | 5.9  |
|    | E4 | 0.40   | 0.62   | 0.42   | 559.8  | 0.36   | 0.36   | 0.35   | 3536.1 | 0.61 | 0.72 | 0.70 | 9.4  | 0.11 | 0.10 | 0.10 | 49.0 |
| 19 | E1 | 1183.4 | 691.2  | 1095.4 | 608.9  | 3515.3 | 1627.3 | 1454.4 | 1619.9 | 22.8 | 15.4 | 19.3 | 19.4 | 75.5 | 25.7 | 24.1 | 27.8 |
|    | E2 | 0.56   | 1273.4 | 731.1  | 542.0  | 0.40   | 4657.2 | 1637.7 | 1863.9 | 0.77 | 17.4 | 14.3 | 16.4 | 0.34 | 77.7 | 19.3 | 16.4 |
|    | E3 | 0.81   | 0.52   | 1566.3 | 827.9  | 0.39   | 0.38   | 3944.8 | 1744.0 | 0.88 | 0.74 | 21.3 | 19.4 | 0.31 | 0.25 | 78.5 | 17.2 |
|    | E4 | 0.65   | 0.56   | 0.77   | 742.2  | 0.39   | 0.39   | 0.40   | 4893.3 | 0.89 | 0.86 | 0.92 | 20.8 | 0.44 | 0.25 | 0.26 | 53.8 |
| 20 | E1 | 1688.2 | 1084.4 | 752.9  | 981.9  | 2754.9 | 972.3  | 1250.2 | 1241.4 | 24.4 | 20.0 | 19.2 | 19.4 | 91.0 | 23.9 | 15.0 | 27.8 |
|    | E2 | 0.80   | 1098.6 | 560.2  | 920.7  | 0.48   | 1508.4 | 942.4  | 912.0  | 0.97 | 17.5 | 15.3 | 20.9 | 0.36 | 49.8 | 22.8 | 19.3 |
|    | E3 | 0.67   | 0.62   | 748.9  | 759.5  | 0.44   | 0.45   | 2875.9 | 1313.2 | 0.83 | 0.78 | 21.9 | 21.8 | 0.18 | 0.36 | 79.5 | 17.9 |
|    | E4 | 0.63   | 0.73   | 0.73   | 1444.0 | 0.45   | 0.45   | 0.46   | 2789.6 | 0.78 | 0.99 | 0.92 | 25.6 | 0.40 | 0.38 | 0.28 | 52.7 |

---

Envi: environment



**Table S5 Estimates of genetic and residual covariances and correlations (in the lower diagonal) based on individual NAM populations 21-25**

| PopId | Envi | LL                 |        |        |        |                     |        |        |        | LW                 |      |      |      |                     |       |       |      |
|-------|------|--------------------|--------|--------|--------|---------------------|--------|--------|--------|--------------------|------|------|------|---------------------|-------|-------|------|
|       |      | Genetic covariance |        |        |        | Residual covariance |        |        |        | Genetic covariance |      |      |      | Residual covariance |       |       |      |
|       |      | E1                 | E2     | E3     | E4     | E1                  | E2     | E3     | E4     | E1                 | E2   | E3   | E4   | E1                  | E2    | E3    | E4   |
| 21    | E1   | 1153.0             | 1104.6 | 913.2  | 905.8  | 2485.8              | 1047.1 | 1313.0 | 965.1  | 32.4               | 16.3 | 18.8 | 17.0 | 69.6                | 4.7   | 15.0  | 11.0 |
|       | E2   | 0.81               | 1603.0 | 1203.6 | 1269.5 | 0.44                | 2329.9 | 1258.4 | 943.2  | 0.68               | 17.6 | 9.5  | 9.2  | 0.07                | 69.84 | 7.07  | 12.5 |
|       | E3   | 0.79               | 0.88   | 1167.9 | 1097.4 | 0.43                | 0.43   | 3690.1 | 1186.7 | 0.65               | 0.45 | 25.8 | 13.9 | 0.18                | 0.09  | 98.2  | 6.8  |
|       | E4   | 0.72               | 0.85   | 0.86   | 1391.6 | 0.41                | 0.42   | 0.42   | 2212.9 | 0.82               | 0.60 | 0.75 | 13.4 | 0.16                | 0.19  | 0.09  | 64.7 |
| 22    | E1   | 1000.1             | 1000.2 | 477.3  | 375.1  | 4400.6              | 1041.3 | 1010.4 | 996.9  | 30.4               | 25.9 | 18.9 | 20.9 | 243.8               | 17.8  | 28.6  | 15.5 |
|       | E2   | 0.71               | 1972.3 | 625.6  | 694.1  | 0.29                | 2934.1 | 831.3  | 839.4  | 0.84               | 31.5 | 16.6 | 25.0 | 0.15                | 56.6  | 15.2  | 13.3 |
|       | E3   | 0.57               | 0.53   | 707.1  | 552.6  | 0.29                | 0.29   | 2788.5 | 808.0  | 0.95               | 0.82 | 13.0 | 14.4 | 0.19                | 0.21  | 92.2  | 11.8 |
|       | E4   | 0.42               | 0.56   | 0.74   | 786.1  | 0.29                | 0.29   | 0.29   | 2780.3 | 0.83               | 0.98 | 0.87 | 21.0 | 0.14                | 0.24  | 0.17  | 52.1 |
| 23    | E1   | 1329.2             | 842.1  | 765.1  | 831.6  | 3094.9              | 776.0  | 778.0  | 872.5  | 17.0               | 13.4 | 18.3 | 19.9 | 102.6               | 27.2  | 21.4  | 20.8 |
|       | E2   | 0.70               | 1097.0 | 633.3  | 703.5  | 0.24                | 3333.9 | 800.1  | 905.6  | 0.69               | 22.3 | 14.0 | 18.0 | 0.27                | 96.7  | 21.1  | 19.7 |
|       | E3   | 0.85               | 0.78   | 603.7  | 622.1  | 0.24                | 0.24   | 3317.6 | 905.5  | 0.98               | 0.65 | 20.5 | 14.3 | 0.27                | 0.27  | 62.0  | 15.0 |
|       | E4   | 0.72               | 0.67   | 0.80   | 995.9  | 0.24                | 0.24   | 0.24   | 4239.4 | 0.99               | 0.78 | 0.65 | 23.5 | 0.27                | 0.27  | 0.25  | 56.6 |
| 24    | E1   | 1495.4             | 541.3  | 724.0  | 537.2  | 3241.0              | 1437.8 | 1738.8 | 1528.7 | 39.5               | 22.4 | 24.7 | 27.0 | 72.2                | 12.9  | 19.4  | 19.1 |
|       | E2   | 0.78               | 318.5  | 427.3  | 306.8  | 0.43                | 3479.4 | 1815.5 | 1611.7 | 0.78               | 20.8 | 18.2 | 17.6 | 0.19                | 66.6  | 18.2  | 18.5 |
|       | E3   | 0.53               | 0.68   | 1242.5 | 610.6  | 0.42                | 0.43   | 5179.5 | 1917.9 | 0.93               | 0.94 | 18.1 | 17.1 | 0.25                | 0.24  | 83.8  | 13.8 |
|       | E4   | 0.54               | 0.67   | 0.67   | 664.0  | 0.42                | 0.43   | 0.42   | 4031.1 | 0.95               | 0.85 | 0.88 | 20.6 | 0.31                | 0.31  | 0.21  | 52.6 |
| 25    | E1   | 1607.2             | 918.9  | 1127.7 | 697.3  | 2857.2              | 1072.6 | 1288.7 | 1393.5 | 29.9               | 18.1 | 16.0 | 20.1 | 85.2                | 28.3  | 26.8  | 22.6 |
|       | E2   | 0.73               | 978.6  | 727.8  | 766.6  | 0.41                | 2432.8 | 1174.9 | 1302.6 | 0.59               | 31.8 | 9.3  | 30.3 | 0.44                | 47.6  | 26.7  | 26.9 |
|       | E3   | 0.77               | 0.63   | 1348.0 | 666.3  | 0.40                | 0.39   | 3725.9 | 1592.9 | 0.85               | 0.48 | 12.0 | 11.8 | 0.28                | 0.37  | 110.2 | 29.9 |
|       | E4   | 0.59               | 0.82   | 0.61   | 883.6  | 0.40                | 0.40   | 0.40   | 4337.6 | 0.61               | 0.89 | 0.56 | 36.5 | 0.32                | 0.51  | 0.37  | 59.4 |

Envi: environment

**Table S6 Estimates of genetic and residual covariance and correlation (in the lower diagonal) based on a full data set of 25 NAM populations.**

| LL                 |        |        |        |        | LW                  |         |         |         |                    |       |      |       |                     |       |        |       |
|--------------------|--------|--------|--------|--------|---------------------|---------|---------|---------|--------------------|-------|------|-------|---------------------|-------|--------|-------|
| Genetic covariance |        |        |        |        | Residual covariance |         |         |         | Genetic covariance |       |      |       | Residual covariance |       |        |       |
| Envi               | E1     | E2     | E3     | E4     | E1                  | E2      | E3      | E4      | E1                 | E2    | E3   | E4    | E1                  | E2    | E3     | E4    |
| E1                 | 401.98 | 357.82 | 364.59 | 345.25 | 5097.97             | 2021.13 | 2029.87 | 1977.42 | 12.94              | 9.743 | 9.70 | 10.97 | 137.20              | 38.03 | 35.99  | 42.44 |
| E2                 | 0.83   | 460.65 | 351.99 | 393.84 | 0.45                | 3882.87 | 1719.01 | 1992.78 | 0.90               | 8.97  | 7.72 | 9.44  | 0.36                | 81.45 | 81.45  | 30.95 |
| E3                 | 0.88   | 0.79   | 427.45 | 373.01 | 0.40                | 0.38    | 5261.99 | 2016.00 | 0.91               | 0.87  | 8.74 | 8.92  | 0.30                | 0.34  | 104.49 | 35.47 |
| E4                 | 0.82   | 0.87   | 0.86   | 440.38 | 0.40                | 0.46    | 0.40    | 4872.04 | 0.92               | 0.95  | 0.91 | 11.09 | 0.39                | 0.44  | 0.38   | 85.04 |

Envi: environment

**Table S7 Accuracy of WP prediction for environment E1 with QP and GWP in CV1**

| PopId | LL              |                  |                          |                          | LW              |                  |                          |                  |
|-------|-----------------|------------------|--------------------------|--------------------------|-----------------|------------------|--------------------------|------------------|
|       | SE              |                  | ME                       |                          | SE              |                  | ME                       |                  |
|       | QP <sup>a</sup> | GWP <sup>b</sup> | QP <sup>c</sup>          | GWP <sup>d</sup>         | QP <sup>a</sup> | GWP <sup>b</sup> | QP <sup>c</sup>          | GWP <sup>d</sup> |
| 1     | 0.25(1.5)       | 0.33(0.32)       | 0.34(3.3, 0.36)          | 0.42(0.24, 0.27)         | 0.06(1.4)       | 0.29(3.83)       | 0.11(2.1, 0.83)          | 0.39(2.55, 0.34) |
| 2     | 0.02(1.1)       | 0.17(7.50)       | 0.01(1.6, <b>-0.50</b> ) | 0.24(23.00, 0.41)        | 0.25(2.0)       | 0.40(0.60)       | 0.18(1.8, -0.28)         | 0.45(1.50, 0.12) |
| 3     | 0.09(1.2)       | 0.28(2.11)       | 0.08(1.7, <b>-0.11</b> ) | 0.28(2.50, <b>0.00</b> ) | 0.39(3.2)       | 0.55(0.41)       | 0.36(3.0, -0.08)         | 0.59(0.64, 0.07) |
| 4     | 0.24(2.8)       | 0.48(1.00)       | 0.22(3.3, <b>-0.08</b> ) | 0.50(1.27, 0.04)         | 0.25(2.6)       | 0.49(0.96)       | 0.21(2.4, -0.16)         | 0.53(1.52, 0.08) |
| 5     | 0.16(2.0)       | 0.32(1.00)       | 0.22(3.0, 0.38)          | 0.39(0.77, 0.22)         | 0.05(1.4)       | 0.20(3.00)       | 0.03(1.6, <b>-0.40</b> ) | 0.29(8.67, 0.45) |
| 6     | 0.26(2.4)       | 0.50(0.92)       | 0.22(2.8, -0.15)         | 0.53(1.41, 0.06)         | 0.03(1.4)       | 0.32(9.67)       | 0.06(1.6, 1.00)          | 0.38(5.33, 0.19) |
| 7     | 0.33(2.7)       | 0.52(0.58)       | 0.29(2.4, -0.12)         | 0.57(0.97, 0.10)         | 0.26(2.8)       | 0.48(0.85)       | 0.22(2.5, -0.15)         | 0.52(1.36, 0.08) |
| 8     | 0.07(1.6)       | 0.31(3.43)       | 0.08(2.0, <b>0.14</b> )  | 0.35(3.37, 0.13)         | 0.06(1.4)       | 0.31(4.17)       | 0.16(1.9, 1.67)          | 0.38(1.38, 0.23) |
| 9     | 0.31(2.3)       | 0.34(0.10)       | 0.25(2.5, -0.19)         | 0.38(0.52, 0.12)         | 0.02(1.1)       | 0.17(7.50)       | 0.13(2.1, 5.50)          | 0.36(1.77, 1.12) |
| 10    | 0.26(2.4)       | 0.47(0.81)       | 0.22(2.8, -0.15)         | 0.49(1.23, 0.04)         | 0.20(2.5)       | 0.39(0.95)       | 0.17(3.1, <b>-0.15</b> ) | 0.52(2.06, 0.33) |
| 11    | 0.26(2.4)       | 0.37(0.42)       | 0.27(3.0, <b>0.04</b> )  | 0.45(0.67, 0.22)         | 0.13(2.5)       | 0.39(2.00)       | 0.15(3.1, <b>0.15</b> )  | 0.42(1.80, 0.08) |
| 12    | 0.24(3.0)       | 0.49(1.04)       | 0.20(2.6, -0.17)         | 0.54(1.70, 0.10)         | 0.29(3.1)       | 0.54(0.86)       | 0.31(3.3, 0.07)          | 0.57(0.84, 0.06) |
| 13    | 0.20(2.7)       | 0.45(1.25)       | 0.16(2.9, -0.20)         | 0.47(1.94, 0.04)         | 0.34(3.0)       | 0.50(0.47)       | 0.28(3.5, -0.18)         | 0.52(0.86, 0.04) |
| 14    | 0.13(2.0)       | 0.38(1.92)       | 0.14(2.3, <b>0.08</b> )  | 0.42(2.00, 0.11)         | 0.20(2.4)       | 0.47(1.35)       | 0.14(1.9, -0.30)         | 0.50(2.57, 0.06) |
| 15    | 0.09(1.6)       | 0.28(2.11)       | 0.07(1.9, <b>-0.22</b> ) | 0.31(3.43, 0.11)         | 0.13(1.8)       | 0.30(1.31)       | 0.12(2.8, <b>-0.08</b> ) | 0.34(1.83, 0.13) |
| 16    | 0.22(1.9)       | 0.33(0.50)       | 0.18(2.0, -0.18)         | 0.36(1.00, 0.09)         | 0.24(2.4)       | 0.46(0.92)       | 0.31(3.2, 0.29)          | 0.54(0.74, 0.17) |
| 17    | 0.03(1.2)       | 0.27(8.00)       | 0.04(1.2, <b>0.33</b> )  | 0.29(6.25, 0.07)         | 0.33(3.0)       | 0.55(0.67)       | 0.33(3.7, <b>0.00</b> )  | 0.59(0.79, 0.07) |
| 18    | 0.08(1.2)       | 0.28(2.50)       | 0.03(1.2, -0.62)         | 0.28(8.33, <b>0.00</b> ) | 0.19(2.1)       | 0.39(1.05)       | 0.23(2.5, 0.21)          | 0.43(0.87, 0.10) |
| 19    | 0.29(2.4)       | 0.37(0.28)       | 0.20(2.1, -0.31)         | 0.40(1.00, 0.08)         | 0.29(2.2)       | 0.41(0.41)       | 0.28(2.7, <b>-0.03</b> ) | 0.44(0.57, 0.07) |
| 20    | 0.15(2.6)       | 0.47(2.13)       | 0.09(2.4, -0.40)         | 0.48(4.33, 0.02)         | 0.21(2.2)       | 0.47(1.24)       | 0.29(2.7, 0.38)          | 0.51(0.76, 0.09) |
| 21    | 0.35(3.1)       | 0.49(0.40)       | 0.32(3.4, <b>-0.09</b> ) | 0.51(0.59, 0.04)         | 0.19(2.2)       | 0.47(1.47)       | 0.11(2.1, -0.42)         | 0.48(3.36, 0.02) |
| 22    | 0.16(1.5)       | 0.35(1.19)       | 0.19(2.4, <b>0.19</b> )  | 0.41(1.16, 0.17)         | 0.03(1.2)       | 0.32(9.67)       | 0.12(2.0, 3.00)          | 0.42(2.50, 0.31) |
| 23    | 0.31(3.1)       | 0.42(0.35)       | 0.24(2.6, -0.23)         | 0.46(0.92, 0.10)         | 0.06(1.8)       | 0.29(3.83)       | 0.17(2.9, 1.83)          | 0.43(1.53, 0.48) |
| 24    | 0.18(2.7)       | 0.45(1.50)       | 0.11(1.8, -0.39)         | 0.44(3.00, -0.02)        | 0.33(3.1)       | 0.50(0.52)       | 0.36(3.0, 0.09)          | 0.53(0.47, 0.06) |
| 25    | 0.20(2.8)       | 0.50(1.50)       | 0.20(2.6, <b>0.00</b> )  | 0.51(1.55, 0.02)         | 0.26(2.9)       | 0.45(0.73)       | 0.25(2.4, <b>-0.04</b> ) | 0.48(0.92, 0.07) |
| Mean  | 0.20(2.2)       | 0.38(0.93)       | 0.17(2.4, -0.10)         | 0.42(1.40, 0.10)         | 0.19(2.2)       | 0.40(1.11)       | 0.20(2.6, 0.06)          | 0.46(1.29, 0.15) |

<sup>a</sup> In parentheses is the number of QTL identified by QP based on the SE model; <sup>b</sup> In parentheses is the gain in prediction accuracy with GWP over QP based on the SE model; <sup>c</sup> The first value in parentheses is the number of QTL identified by QP based on the ME model; and the second one the gain

with ME over SE for QP; <sup>d</sup> The first value in parentheses is the gain in accuracy with GWP over QP based on the ME model; and the second one is the gain with ME over SE using GWP. Bold in parentheses indicates the number is not significant at  $\alpha = 0.05$ .

**Table S8 Accuracy of WP prediction for environment E2 with QP and GWP in CV1**

| PopId | LL              |                  |                          |                          | LW              |                  |                          |                          |
|-------|-----------------|------------------|--------------------------|--------------------------|-----------------|------------------|--------------------------|--------------------------|
|       | SE              |                  | ME                       |                          | SE              |                  | ME                       |                          |
|       | QP <sup>a</sup> | GWP <sup>b</sup> | QP <sup>c</sup>          | GWP <sup>d</sup>         | QP <sup>a</sup> | GWP <sup>b</sup> | QP <sup>c</sup>          | GWP <sup>d</sup>         |
| 1     | 0.50(4.0)       | 0.67(0.34)       | 0.48(3.3, <b>-0.04</b> ) | 0.67(0.40, <b>0.00</b> ) | 0.17(2.5)       | 0.46(1.71)       | 0.16(2.1, <b>-0.06</b> ) | 0.50(2.12, 0.09)         |
| 2     | 0.11(2.2)       | 0.40(2.64)       | 0.05(1.6, -0.55)         | 0.40(7.00, <b>0.00</b> ) | 0.21(2.5)       | 0.49(1.33)       | 0.17(1.8, -0.19)         | 0.53(2.12, 0.08)         |
| 3     | 0.21(1.8)       | 0.17(-0.19)      | 0.09(1.7, -0.57)         | 0.18(1.00, 0.06)         | 0.35(3.3)       | 0.59(0.69)       | 0.35(3.0, <b>0.00</b> )  | 0.61(0.74, 0.03)         |
| 4     | 0.20(2.9)       | 0.56(1.80)       | 0.25(3.3, 0.25)          | 0.57(1.28, 0.02)         | 0.41(3.0)       | 0.59(0.44)       | 0.28(2.4, -0.32)         | 0.62(1.21, 0.05)         |
| 5     | 0.27(3.0)       | 0.50(0.85)       | 0.25(3.0, <b>-0.07</b> ) | 0.51(1.04, 0.02)         | 0.07(2.4)       | 0.45(5.43)       | 0.05(1.6, <b>-0.29</b> ) | 0.46(8.20, 0.02)         |
| 6     | 0.22(2.6)       | 0.49(1.23)       | 0.17(2.8, -0.23)         | 0.50(1.94, 0.02)         | 0.07(1.2)       | 0.33(3.71)       | 0.09(1.6, <b>0.29</b> )  | 0.34(2.78, 0.03)         |
| 7     | 0.25(2.0)       | 0.42(0.68)       | 0.25(2.4, <b>0.00</b> )  | 0.51(1.04, 0.21)         | 0.35(3.0)       | 0.58(0.66)       | 0.27(2.5, -0.23)         | 0.62(1.30, 0.07)         |
| 8     | 0.10(1.9)       | 0.35(2.50)       | 0.11(2.0, <b>0.10</b> )  | 0.37(2.36, 0.06)         | 0.21(1.6)       | 0.35(0.67)       | 0.21(1.9, <b>0.00</b> )  | 0.42(1.00, 0.20)         |
| 9     | 0.07(2.0)       | 0.30(3.29)       | 0.11(2.5, 0.57)          | 0.32(1.91, 0.07)         | 0.22(2.3)       | 0.44(1.00)       | 0.25(2.1, 0.14)          | 0.43(0.72, -0.02)        |
| 10    | 0.19(2.7)       | 0.50(1.63)       | 0.18(2.8, <b>-0.05</b> ) | 0.51(1.83, 0.02)         | 0.14(1.9)       | 0.36(1.57)       | 0.18(3.1, 0.29)          | 0.36(1.00, <b>0.00</b> ) |
| 11    | 0.26(2.8)       | 0.52(1.00)       | 0.31(3.0, 0.19)          | 0.55(0.77, 0.06)         | 0.27(2.0)       | 0.40(0.48)       | 0.25(3.1, <b>-0.07</b> ) | 0.43(0.72, 0.07)         |
| 12    | 0.22(3.0)       | 0.56(1.55)       | 0.21(2.6, <b>-0.05</b> ) | 0.59(1.81, 0.05)         | 0.27(3.4)       | 0.58(1.15)       | 0.30(3.3, 0.11)          | 0.61(1.03, 0.05)         |
| 13    | 0.21(2.4)       | 0.40(0.90)       | 0.19(2.9, <b>-0.10</b> ) | 0.45(1.37, 0.12)         | 0.18(2.1)       | 0.39(1.17)       | 0.19(3.5, <b>0.06</b> )  | 0.47(1.47, 0.21)         |
| 14    | 0.32(2.9)       | 0.42(0.31)       | 0.19(2.3, -0.41)         | 0.42(1.21, <b>0.00</b> ) | 0.05(1.4)       | 0.27(4.40)       | 0.07(1.9, <b>0.40</b> )  | 0.36(4.14, 0.33)         |
| 15    | 0.25(3.0)       | 0.46(0.84)       | 0.15(1.9, -0.40)         | 0.46(2.07, <b>0.00</b> ) | 0.21(2.9)       | 0.55(1.62)       | 0.18(2.8, -0.14)         | 0.58(2.22, 0.05)         |
| 16    | 0.19(2.1)       | 0.31(0.63)       | 0.17(2.0, <b>-0.11</b> ) | 0.32(0.88, 0.03)         | 0.44(3.3)       | 0.56(0.27)       | 0.36(3.2, -0.18)         | 0.59(0.64, 0.05)         |
| 17    | 0.04(0.9)       | 0.13(2.25)       | 0.02(1.2, <b>-0.50</b> ) | 0.19(8.50, 0.46)         | 0.40(3.5)       | 0.61(0.52)       | 0.38(3.7, <b>-0.05</b> ) | 0.64(0.68, 0.05)         |
| 18    | 0.02(1.1)       | 0.29(13.50)      | 0.03(1.2, <b>0.50</b> )  | 0.31(9.33, 0.07)         | 0.18(1.9)       | 0.30(0.67)       | 0.27(2.5, 0.50)          | 0.43(0.59, 0.43)         |
| 19    | 0.08(1.5)       | 0.28(2.50)       | 0.05(2.1, -0.38)         | 0.30(5.00, 0.07)         | 0.20(2.3)       | 0.40(1.00)       | 0.25(2.7, 0.25)          | 0.46(0.84, 0.15)         |
| 20    | 0.11(2.2)       | 0.52(3.73)       | 0.10(2.4, <b>-0.09</b> ) | 0.54(4.40, 0.04)         | 0.31(3.0)       | 0.53(0.71)       | 0.31(2.7, <b>0.00</b> )  | 0.56(0.81, 0.06)         |
| 21    | 0.35(3.3)       | 0.58(0.66)       | 0.35(3.4, <b>0.00</b> )  | 0.61(0.74, 0.05)         | 0.14(1.8)       | 0.35(1.50)       | 0.08(2.1, -0.43)         | 0.40(4.00, 0.14)         |
| 22    | 0.34(2.6)       | 0.49(0.44)       | 0.22(2.4, -0.35)         | 0.50(1.27, 0.02)         | 0.32(2.9)       | 0.58(0.81)       | 0.23(2.0, -0.28)         | 0.60(1.61, 0.03)         |
| 23    | 0.16(2.4)       | 0.43(1.69)       | 0.16(2.6, <b>0.00</b> )  | 0.46(1.88, 0.07)         | 0.24(2.0)       | 0.36(0.50)       | 0.21(2.9, <b>-0.12</b> ) | 0.41(0.95, 0.14)         |
| 24    | 0.01(1.2)       | 0.16(15.00)      | 0.06(1.8, 5.00)          | 0.25(3.17, 0.56)         | 0.25(2.2)       | 0.42(0.68)       | 0.32(3.0, 0.28)          | 0.48(0.50, 0.14)         |
| 25    | 0.10(2.2)       | 0.38(2.80)       | 0.05(2.6, -0.50)         | 0.42(7.40, 0.11)         | 0.29(2.7)       | 0.47(0.62)       | 0.27(2.4, <b>-0.07</b> ) | 0.45(0.67, -0.04)        |
| Mean  | 0.19(2.4)       | 0.41(1.15)       | 0.17(2.4, -0.12)         | 0.44(1.60, 0.06)         | 0.24(2.4)       | 0.46(0.92)       | 0.23(2.6, -0.05)         | 0.49(1.18, 0.08)         |

<sup>a</sup> In parentheses is the number of QTL identified by QP based on the SE model; <sup>b</sup> In parentheses is the gain in prediction accuracy with GWP over QP based on the SE model; <sup>c</sup> The first value in parentheses is the number of QTL identified by QP based on the ME model; and the second one the gain

with ME over SE for QP; <sup>d</sup> The first value in parentheses is the gain in accuracy with GWP over QP based on the ME model; and the second one is the gain with ME over SE using GWP. Bold in parentheses indicates the number is not significant at  $\alpha = 0.05$ .

**Table S9 Accuracy of WP prediction for environment E3 with QP and GWP in CV1**

| PopId | LL              |                  |                          |                  | LW              |                  |                         |                          |
|-------|-----------------|------------------|--------------------------|------------------|-----------------|------------------|-------------------------|--------------------------|
|       | SE              |                  | ME                       |                  | SE              |                  | ME                      |                          |
|       | QP <sup>a</sup> | GWP <sup>b</sup> | QP <sup>c</sup>          | GWP <sup>d</sup> | QP <sup>a</sup> | GWP <sup>b</sup> | QP <sup>c</sup>         | GWP <sup>d</sup>         |
| 1     | 0.32(2.8)       | 0.51(0.59)       | 0.34(3.3, <b>0.06</b> )  | 0.55(0.62, 0.08) | 0.12(1.5)       | 0.36(2.00)       | 0.13(2.1, 0.08)         | 0.41(2.15, 0.14)         |
| 2     | 0.09(1.7)       | 0.35(2.89)       | 0.04(1.6, -0.56)         | 0.36(8.00, 0.03) | 0.23(2.8)       | 0.52(1.26)       | 0.16(1.8, -0.30)        | 0.55(2.44, 0.06)         |
| 3     | 0.07(1.3)       | 0.24(2.43)       | 0.06(1.7, <b>-0.14</b> ) | 0.26(3.33, 0.08) | 0.27(2.1)       | 0.27(0.00)       | 0.27(3.0, <b>0.00</b> ) | 0.37(0.37, 0.37)         |
| 4     | 0.30(2.9)       | 0.50(0.67)       | 0.28(3.3, <b>-0.07</b> ) | 0.54(0.93, 0.08) | 0.01(1.3)       | 0.18(17.00)      | 0.05(2.4, 4.00)         | 0.29(4.80, 0.61)         |
| 5     | 0.23(2.7)       | 0.44(0.91)       | 0.21(3.0, <b>-0.09</b> ) | 0.46(1.19, 0.05) | 0.04(1.4)       | 0.30(6.50)       | 0.04(1.6, 0.00)         | 0.39(8.75, 0.30)         |
| 6     | 0.36(2.5)       | 0.47(0.31)       | 0.24(2.8, -0.33)         | 0.54(1.25, 0.15) | 0.09(1.8)       | 0.31(2.44)       | 0.06(1.6, -0.33)        | 0.35(4.83, 0.13)         |
| 7     | 0.26(2.4)       | 0.49(0.88)       | 0.25(2.4, <b>-0.04</b> ) | 0.55(1.20, 0.12) | 0.19(2.0)       | 0.42(1.21)       | 0.21(2.5, <b>0.11</b> ) | 0.50(1.38, 0.19)         |
| 8     | 0.06(1.7)       | 0.32(4.33)       | 0.07(2.0, <b>0.17</b> )  | 0.35(4.00, 0.09) | 0.14(2.2)       | 0.48(2.43)       | 0.15(1.9, <b>0.07</b> ) | 0.49(2.27, 0.02)         |
| 9     | 0.18(2.3)       | 0.42(1.33)       | 0.22(2.5, 0.22)          | 0.45(1.05, 0.07) | 0.17(2.6)       | 0.45(1.65)       | 0.25(2.1, 0.47)         | 0.48(0.92, 0.07)         |
| 10    | 0.11(2.6)       | 0.42(2.82)       | 0.12(2.8, <b>0.09</b> )  | 0.48(3.00, 0.14) | 0.33(3.3)       | 0.56(0.70)       | 0.25(3.1, -0.24)        | 0.56(1.24, <b>0.00</b> ) |
| 11    | 0.31(2.7)       | 0.54(0.74)       | 0.31(3.0, <b>0.00</b> )  | 0.56(0.81, 0.04) | 0.10(2.1)       | 0.36(2.60)       | 0.11(3.1, <b>0.10</b> ) | 0.41(2.73, 0.14)         |
| 12    | 0.18(2.3)       | 0.43(1.39)       | 0.17(2.6, <b>-0.06</b> ) | 0.50(1.94, 0.16) | 0.07(1.3)       | 0.28(3.00)       | 0.17(3.3, 1.43)         | 0.38(1.24, 0.36)         |
| 13    | 0.19(2.8)       | 0.41(1.16)       | 0.19(2.9, <b>0.00</b> )  | 0.43(1.26, 0.05) | 0.06(2.0)       | 0.26(3.33)       | 0.15(3.5, 1.50)         | 0.35(1.33, 0.35)         |
| 14    | 0.16(2.1)       | 0.31(0.94)       | 0.12(2.3, -0.25)         | 0.35(1.92, 0.13) | 0.10(1.6)       | 0.32(2.20)       | 0.12(1.9, <b>0.20</b> ) | 0.42(2.50, 0.31)         |
| 15    | 0.05(1.4)       | 0.25(4.00)       | 0.08(1.9, <b>0.60</b> )  | 0.30(2.75, 0.20) | 0.16(2.0)       | 0.40(1.50)       | 0.18(2.8, <b>0.12</b> ) | 0.48(1.67, 0.20)         |
| 16    | 0.10(1.9)       | 0.32(2.20)       | 0.07(2.0, -0.30)         | 0.33(3.71, 0.03) | 0.08(1.7)       | 0.36(3.50)       | 0.21(3.2, 1.62)         | 0.45(1.14, 0.25)         |
| 17    | 0.07(1.5)       | 0.32(3.57)       | 0.07(1.2, <b>0.00</b> )  | 0.37(4.29, 0.16) | 0.12(2.0)       | 0.38(2.17)       | 0.23(3.7, 0.92)         | 0.45(0.96, 0.18)         |
| 18    | 0.01(1.0)       | 0.17(16.00)      | 0.03(1.2, <b>2.00</b> )  | 0.21(6.00, 0.24) | 0.33(2.4)       | 0.33(0.00)       | 0.30(2.5, -0.09)        | 0.39(0.30, 0.18)         |
| 19    | 0.25(2.8)       | 0.46(0.84)       | 0.20(2.1, -0.20)         | 0.47(1.35, 0.02) | 0.21(2.1)       | 0.44(1.10)       | 0.29(2.7, 0.38)         | 0.46(0.59, 0.05)         |
| 20    | 0.13(1.9)       | 0.34(1.62)       | 0.05(2.4, -0.62)         | 0.39(6.80, 0.15) | 0.15(2.1)       | 0.43(1.87)       | 0.24(2.7, 0.60)         | 0.46(0.92, 0.07)         |
| 21    | 0.24(2.6)       | 0.47(0.96)       | 0.33(3.4, 0.38)          | 0.54(0.64, 0.15) | 0.21(2.5)       | 0.38(0.81)       | 0.11(2.1, -0.48)        | 0.42(2.82, 0.11)         |
| 22    | 0.21(1.9)       | 0.38(0.81)       | 0.22(2.4, <b>0.05</b> )  | 0.40(0.82, 0.05) | 0.09(1.4)       | 0.35(2.89)       | 0.11(2.0, <b>0.22</b> ) | 0.43(2.91, 0.23)         |
| 23    | 0.21(1.8)       | 0.32(0.52)       | 0.21(2.6, <b>0.00</b> )  | 0.42(1.00, 0.31) | 0.14(2.1)       | 0.38(1.71)       | 0.20(2.9, 0.43)         | 0.42(1.10, 0.11)         |
| 24    | 0.04(1.6)       | 0.26(5.50)       | 0.05(1.8, <b>0.25</b> )  | 0.27(4.40, 0.04) | 0.34(2.2)       | 0.41(0.21)       | 0.38(3.0, 0.12)         | 0.48(0.26, 0.17)         |
| 25    | 0.11(2.0)       | 0.37(2.36)       | 0.15(2.6, 0.36)          | 0.40(1.67, 0.08) | 0.11(1.6)       | 0.29(1.64)       | 0.16(2.4, 0.45)         | 0.34(1.12, 0.17)         |
| Mean  | 0.17(2.1)       | 0.38(1.24)       | 0.16(2.4, -0.04)         | 0.42(1.57, 0.10) | 0.15(2.0)       | 0.37(1.40)       | 0.18(2.6, 0.18)         | 0.43(1.37, 0.16)         |

<sup>a</sup> In parentheses is the number of QTL identified by QP based on the SE model; <sup>b</sup> In parentheses is the gain in prediction accuracy with GWP over QP based on the SE model; <sup>c</sup> The first value in parentheses is the number of QTL identified by QP based on the ME model; and the second one the gain

with ME over SE for QP; <sup>d</sup> The first value in parentheses is the gain in accuracy with GWP over QP based on the ME model; and the second one is the gain with ME over SE using GWP. Bold in parentheses indicates the number is not significant at  $\alpha = 0.05$ .



**Table S10 Accuracy of WP prediction for environment E4 with QP and GWP in CV1**

| PopId | LL              |                  |                          |                   | LW              |                  |                          |                          |
|-------|-----------------|------------------|--------------------------|-------------------|-----------------|------------------|--------------------------|--------------------------|
|       | SE              |                  | ME                       |                   | SE              |                  | ME                       |                          |
|       | QP <sup>a</sup> | GWP <sup>b</sup> | QP <sup>c</sup>          | GWP <sup>d</sup>  | QP <sup>a</sup> | GWP <sup>b</sup> | QP <sup>c</sup>          | GWP <sup>d</sup>         |
| 1     | 0.31(2.5)       | 0.47(0.52)       | 0.36(3.3, 0.16)          | 0.51(0.42, 0.09)  | 0.26(2.7)       | 0.50(0.92)       | 0.21(2.1, -0.19)         | 0.54(1.57, 0.08)         |
| 2     | 0.06(1.7)       | 0.30(4.00)       | 0.02(1.6, -0.67)         | 0.32(15.00, 0.07) | 0.22(2.4)       | 0.48(1.18)       | 0.14(1.8, -0.36)         | 0.51(2.64, 0.06)         |
| 3     | 0.08(1.3)       | 0.26(2.25)       | 0.04(1.7, -0.50)         | 0.27(5.75, 0.04)  | 0.29(2.5)       | 0.42(0.45)       | 0.30(3.0, <b>0.03</b> )  | 0.52(0.73, 0.24)         |
| 4     | 0.31(3.0)       | 0.52(0.68)       | 0.32(3.3, <b>0.03</b> )  | 0.56(0.75, 0.08)  | 0.35(2.8)       | 0.51(0.46)       | 0.26(2.4, -0.26)         | 0.54(1.08, 0.06)         |
| 5     | 0.08(1.8)       | 0.35(3.37)       | 0.12(3.0, 0.50)          | 0.39(2.25, 0.11)  | 0.08(2.1)       | 0.45(4.62)       | 0.04(1.6, -0.50)         | 0.47(10.75, 0.04)        |
| 6     | 0.18(2.6)       | 0.45(1.50)       | 0.23(2.8, 0.28)          | 0.51(1.22, 0.13)  | 0.08(1.7)       | 0.30(2.75)       | 0.03(1.6, -0.62)         | 0.36(11.00, 0.20)        |
| 7     | 0.34(2.5)       | 0.60(0.76)       | 0.29(2.4, -0.15)         | 0.62(1.14, 0.03)  | 0.39(3.4)       | 0.62(0.59)       | 0.29(2.5, -0.26)         | 0.65(1.24, 0.05)         |
| 8     | 0.21(2.1)       | 0.40(0.90)       | 0.15(2.0, -0.29)         | 0.43(1.87, 0.07)  | 0.27(2.3)       | 0.40(0.48)       | 0.22(1.9, -0.19)         | 0.45(1.05, 0.12)         |
| 9     | 0.10(1.9)       | 0.34(2.40)       | 0.10(2.5, <b>0.00</b> )  | 0.37(2.70, 0.09)  | 0.34(2.6)       | 0.47(0.38)       | 0.32(2.1, <b>-0.06</b> ) | 0.47(0.47, <b>0.00</b> ) |
| 10    | 0.16(2.4)       | 0.41(1.56)       | 0.15(2.8, <b>-0.06</b> ) | 0.43(1.87, 0.05)  | 0.26(3.2)       | 0.63(1.42)       | 0.24(3.1, <b>-0.08</b> ) | 0.64(1.67, 0.02)         |
| 11    | 0.14(2.1)       | 0.29(1.07)       | 0.25(3.0, 0.79)          | 0.38(0.52, 0.31)  | 0.18(2.6)       | 0.44(1.44)       | 0.23(3.1, 0.28)          | 0.49(1.13, 0.11)         |
| 12    | 0.17(2.7)       | 0.50(1.94)       | 0.18(2.6, <b>0.06</b> )  | 0.54(2.00, 0.08)  | 0.35(3.4)       | 0.57(0.63)       | 0.34(3.3, <b>-0.03</b> ) | 0.60(0.76, 0.05)         |
| 13    | 0.11(1.3)       | 0.24(1.18)       | 0.13(2.9, <b>0.18</b> )  | 0.34(1.62, 0.42)  | 0.17(1.9)       | 0.42(1.47)       | 0.23(3.5, 0.35)          | 0.49(1.13, 0.17)         |
| 14    | 0.08(2.2)       | 0.34(3.25)       | 0.11(2.3, 0.38)          | 0.37(2.36, 0.09)  | 0.25(2.3)       | 0.45(0.80)       | 0.15(1.9, -0.40)         | 0.49(2.27, 0.09)         |
| 15    | 0.20(1.8)       | 0.36(0.80)       | 0.11(1.9, -0.45)         | 0.37(2.36, 0.03)  | 0.30(3.2)       | 0.53(0.77)       | 0.23(2.8, -0.23)         | 0.56(1.43, 0.06)         |
| 16    | 0.07(1.3)       | 0.20(1.86)       | 0.13(2.0, 0.86)          | 0.28(1.15, 0.40)  | 0.29(2.9)       | 0.53(0.83)       | 0.30(3.2, <b>0.03</b> )  | 0.57(0.90, 0.08)         |
| 17    | 0.14(1.8)       | 0.34(1.43)       | 0.06(1.2, -0.57)         | 0.36(5.00, 0.06)  | 0.32(3.3)       | 0.56(0.75)       | 0.34(3.7, <b>0.06</b> )  | 0.61(0.79, 0.09)         |
| 18    | 0.05(1.2)       | 0.26(4.20)       | 0.02(1.2, -0.60)         | 0.28(13.00, 0.08) | 0.20(2.0)       | 0.31(0.55)       | 0.28(2.5, 0.40)          | 0.38(0.36, 0.23)         |
| 19    | 0.06(1.7)       | 0.26(3.33)       | 0.09(2.1, 0.50)          | 0.31(2.44, 0.19)  | 0.42(3.4)       | 0.51(0.21)       | 0.35(2.7, -0.17)         | 0.55(0.57, 0.08)         |
| 20    | 0.13(2.5)       | 0.46(2.54)       | 0.10(2.4, -0.23)         | 0.48(3.80, 0.04)  | 0.49(2.6)       | 0.52(0.06)       | 0.39(2.7, -0.20)         | 0.55(0.41, 0.06)         |
| 21    | 0.37(3.1)       | 0.61(0.65)       | 0.37(3.4, <b>0.00</b> )  | 0.64(0.73, 0.05)  | 0.08(1.8)       | 0.36(3.50)       | 0.05(2.1, -0.38)         | 0.41(7.20, 0.14)         |
| 22    | 0.28(2.2)       | 0.47(0.68)       | 0.23(2.4, -0.18)         | 0.48(1.09, 0.02)  | 0.27(2.8)       | 0.55(1.04)       | 0.19(2.0, -0.30)         | 0.59(2.11, 0.07)         |
| 23    | 0.25(2.0)       | 0.39(0.56)       | 0.22(2.6, <b>-0.12</b> ) | 0.45(1.05, 0.15)  | 0.27(3.0)       | 0.48(0.78)       | 0.27(2.9, <b>0.00</b> )  | 0.51(0.89, 0.06)         |
| 24    | 0.19(1.8)       | 0.26(0.37)       | 0.06(1.8, -0.68)         | 0.29(3.83, 0.12)  | 0.31(3.2)       | 0.47(0.52)       | 0.33(3.0, <b>0.06</b> )  | 0.51(0.55, 0.09)         |
| 25    | 0.04(1.3)       | 0.26(5.50)       | 0.06(2.6, <b>0.50</b> )  | 0.33(4.50, 0.27)  | 0.27(2.4)       | 0.48(0.78)       | 0.28(2.4, <b>0.04</b> )  | 0.47(0.68, -0.02)        |
| Mean  | 0.16(2.0)       | 0.37(1.27)       | 0.16(2.4, 0.00)          | 0.41(1.64, 0.10)  | 0.27(2.7)       | 0.48(0.78)       | 0.24(2.6, -0.10)         | 0.52(1.15, 0.08)         |

<sup>a</sup> In parentheses is the number of QTL identified by QP based on the SE model; <sup>b</sup> In parentheses is the gain in prediction accuracy with GWP over QP based on the SE model; <sup>c</sup> The first value in parentheses is the number of QTL identified by QP based on the ME model; and the second one the gain

with ME over SE for QP; <sup>d</sup> The first value in parentheses is the gain in accuracy with GWP over QP based on the ME model; and the second one is the gain with ME over SE using GWP. Bold in parentheses indicates the number is not significant at  $\alpha = 0.05$ .

**Table S11 Accuracy of AP prediction for environment E1 with QP and GWP in CV1**

| PopId | SE              |                     | ME                        |                                    | SE              |                  | ME                        |                                   |
|-------|-----------------|---------------------|---------------------------|------------------------------------|-----------------|------------------|---------------------------|-----------------------------------|
|       | QP <sup>a</sup> | GWP <sup>b</sup>    | QP <sup>c</sup>           | GWP <sup>d</sup>                   | QP <sup>a</sup> | GWP <sup>b</sup> | QP <sup>c</sup>           | GWP <sup>d</sup>                  |
| 1     | 0.21(9.0)       | 0.31(0.48)          | 0.28(14.0, 0.33)          | 0.33(0.18, 0.06)                   | 0.19(13.0)      | 0.25(0.32)       | 0.21(12.0, 0.11)          | 0.26(0.24, 0.04)                  |
| 2     | 0.20(9.0)       | 0.19(-0.05)         | 0.21(14.0, <b>0.05</b> )  | 0.20(-0.05, 0.05)                  | 0.37(13.0)      | 0.42(0.14)       | 0.39(12.0, 0.05)          | 0.42(0.08, <b>0.00</b> )          |
| 3     | 0.21(10.0)      | 0.21( <b>0.00</b> ) | 0.20(15.0, <b>-0.05</b> ) | 0.20( <b>0.00</b> , <b>-0.05</b> ) | 0.41(13.0)      | 0.54(0.32)       | 0.46(11.0, 0.12)          | 0.55(0.20, 0.02)                  |
| 4     | 0.37(12.0)      | 0.41(0.11)          | 0.43(12.0, 0.16)          | 0.41(-0.05, <b>0.00</b> )          | 0.28(14.0)      | 0.29(0.04)       | 0.22(12.0, -0.21)         | 0.28(0.27, -0.03)                 |
| 5     | 0.31(11.0)      | 0.28(-0.10)         | 0.23(14.0, -0.26)         | 0.26(0.13, -0.07)                  | 0.16(13.0)      | 0.23(0.44)       | 0.10(12.0, -0.38)         | 0.24(1.40, 0.04)                  |
| 6     | 0.40(10.0)      | 0.46(0.15)          | 0.46(13.0, 0.15)          | 0.47(0.02, 0.02)                   | 0.36(13.0)      | 0.37(0.03)       | 0.40(12.0, 0.11)          | 0.39(-0.03, 0.05)                 |
| 7     | 0.23(11.0)      | 0.24(0.04)          | 0.27(14.0, 0.17)          | 0.26(-0.04, 0.08)                  | 0.34(12.0)      | 0.36(0.06)       | 0.36(12.0, 0.06)          | 0.39(0.08, 0.08)                  |
| 8     | 0.41(9.0)       | 0.47(0.15)          | 0.44(15.0, 0.07)          | 0.47(0.07, <b>0.00</b> )           | 0.32(12.0)      | 0.39(0.22)       | 0.32(12.0, <b>0.00</b> )  | 0.39(0.22, <b>0.00</b> )          |
| 9     | 0.36(10.0)      | 0.36( <b>0.00</b> ) | 0.33(13.0, -0.08)         | 0.38(0.15, 0.06)                   | 0.18(15.0)      | 0.16(-0.11)      | 0.22(13.0, 0.22)          | 0.17(-0.23, 0.06)                 |
| 10    | 0.30(10.0)      | 0.37(0.23)          | 0.37(13.0, 0.23)          | 0.38(0.03, 0.03)                   | 0.42(12.0)      | 0.46(0.10)       | 0.48(13.0, 0.14)          | 0.48( <b>0.00</b> , 0.04)         |
| 11    | 0.03(10.0)      | 0.07(1.33)          | 0.08(15.0, 1.67)          | 0.09(0.13, 0.29)                   | 0.11(13.0)      | 0.17(0.55)       | 0.19(11.0, 0.73)          | 0.18(-0.05, 0.06)                 |
| 12    | 0.34(9.0)       | 0.39(0.15)          | 0.37(15.0, 0.09)          | 0.40(0.08, 0.03)                   | 0.51(12.0)      | 0.59(0.16)       | 0.54(11.0, 0.06)          | 0.61(0.13, 0.03)                  |
| 13    | 0.28(12.0)      | 0.29(0.04)          | 0.35(13.0, 0.25)          | 0.32(-0.09, 0.10)                  | 0.49(14.0)      | 0.42(-0.14)      | 0.50(12.0, <b>0.02</b> )  | 0.43(-0.14, 0.02)                 |
| 14    | 0.35(10.0)      | 0.40(0.14)          | 0.38(12.0, 0.09)          | 0.40(0.05, <b>0.00</b> )           | 0.39(14.0)      | 0.36(-0.08)      | 0.41(12.0, 0.05)          | 0.38(-0.07, 0.06)                 |
| 15    | 0.22(12.0)      | 0.24(0.09)          | 0.20(15.0, -0.09)         | 0.24(0.20, <b>0.00</b> )           | 0.27(14.0)      | 0.31(0.15)       | 0.23(12.0, -0.15)         | 0.31(0.35, <b>0.00</b> )          |
| 16    | 0.18(11.0)      | 0.27(0.50)          | 0.23(13.0, 0.28)          | 0.28(0.22, 0.04)                   | 0.45(12.0)      | 0.52(0.16)       | 0.49(12.0, 0.09)          | 0.52(0.06, <b>0.00</b> )          |
| 17    | 0.29(11.0)      | 0.29( <b>0.00</b> ) | 0.35(13.0, 0.21)          | 0.30(-0.14, 0.03)                  | 0.38(10.0)      | 0.43(0.13)       | 0.47(13.0, 0.24)          | 0.46(-0.02, 0.07)                 |
| 18    | 0.16(10.0)      | 0.14(-0.13)         | 0.12(13.0, -0.25)         | 0.14(0.17, <b>0.00</b> )           | 0.21(14.0)      | 0.30(0.43)       | 0.30(13.0, 0.43)          | 0.31(0.03, 0.03)                  |
| 19    | 0.29(12.0)      | 0.30(0.03)          | 0.32(15.0, 0.10)          | 0.30(-0.06, <b>0.00</b> )          | 0.21(14.0)      | 0.22(0.05)       | 0.26(12.0, 0.24)          | 0.23(-0.12, 0.05)                 |
| 20    | 0.30(9.0)       | 0.42(0.40)          | 0.35(13.0, 0.17)          | 0.43(0.23, 0.02)                   | 0.40(13.0)      | 0.43(0.07)       | 0.34(13.0, -0.15)         | 0.44(0.29, 0.02)                  |
| 21    | 0.31(10.0)      | 0.33(0.06)          | 0.30(14.0, <b>-0.03</b> ) | 0.35(0.17, 0.06)                   | 0.24(13.0)      | 0.32(0.33)       | 0.33(12.0, 0.38)          | 0.34(0.03, 0.06)                  |
| 22    | 0.29(10.0)      | 0.35(0.21)          | 0.31(17.0, 0.07)          | 0.34(0.10, -0.03)                  | 0.24(13.0)      | 0.29(0.21)       | 0.22(12.0, -0.08)         | 0.30(0.36, 0.03)                  |
| 23    | 0.16(9.0)       | 0.21(0.31)          | 0.16(14.0, <b>0.00</b> )  | 0.20(0.25, -0.05)                  | 0.13(14.0)      | 0.15(0.15)       | 0.23(12.0, 0.77)          | 0.18(-0.22, 0.20)                 |
| 24    | 0.18(11.0)      | 0.27(0.50)          | 0.17(15.0, <b>-0.06</b> ) | 0.25(0.47, -0.07)                  | 0.42(12.0)      | 0.45(0.07)       | 0.45(12.0, 0.07)          | 0.45( <b>0.00</b> , <b>0.00</b> ) |
| 25    | 0.35(12.0)      | 0.42(0.20)          | 0.41(15.0, 0.17)          | 0.42(0.02, <b>0.00</b> )           | 0.41(14.0)      | 0.47(0.15)       | 0.40(13.0, <b>-0.02</b> ) | 0.47(0.18, <b>0.00</b> )          |
| Mean  | 0.27(10.4)      | 0.31(0.15)          | 0.29(14.0, 0.09)          | 0.31(0.07, 0.00)                   | 0.32(13.0)      | 0.36(0.13)       | 0.34(12.1, 0.08)          | 0.37(0.09, 0.04)                  |

<sup>a</sup> In parentheses is the number of QTL identified by QP based on the SE model; <sup>b</sup> In parentheses is the gain in prediction accuracy with GWP over QP based on the SE model; <sup>c</sup> The first value in parentheses is the number of QTL identified by QP based on the ME model; and the second one the gain

with ME over SE for QP; <sup>d</sup> The first value in parentheses is the gain in accuracy with GWP over QP based on the ME model; and the second one is the gain with ME over SE using GWP. Bold in parentheses indicates the number is not significant at  $\alpha = 0.05$ .

**Table S12 Accuracy of AP prediction for environment E2 with QP and GWP in CV1**

| PopId | LL              |                     |                          |                                   | LW              |                     |                           |                            |
|-------|-----------------|---------------------|--------------------------|-----------------------------------|-----------------|---------------------|---------------------------|----------------------------|
|       | SE              |                     | ME                       |                                   | SE              |                     | ME                        |                            |
|       | QP <sup>a</sup> | GWP <sup>b</sup>    | QP <sup>c</sup>          | GWP <sup>d</sup>                  | QP <sup>a</sup> | GWP <sup>b</sup>    | QP <sup>c</sup>           | GWP <sup>d</sup>           |
| 1     | 0.27(12.0)      | 0.39(0.44)          | 0.34(14.0, 0.26)         | 0.38(0.12, -0.03)                 | 0.13(11.0)      | 0.21(0.62)          | 0.22(12.0, 0.69)          | 0.24(0.09, 0.14)           |
| 2     | 0.27(13.0)      | 0.28(0.04)          | 0.26(14.0, -0.04)        | 0.29(0.12, 0.04)                  | 0.31(11.0)      | 0.44(0.42)          | 0.35(12.0, 0.13)          | 0.45(0.29, 0.02)           |
| 3     | 0.21(15.0)      | 0.29(0.38)          | 0.28(15.0, 0.33)         | 0.28( <b>0.00</b> , -0.03)        | 0.42(15.0)      | 0.54(0.29)          | 0.51(11.0, 0.21)          | 0.54(0.06, <b>0.00</b> )   |
| 4     | 0.32(14.0)      | 0.38(0.19)          | 0.34(12.0, 0.06)         | 0.39(0.15, 0.03)                  | 0.31(13.0)      | 0.34(0.10)          | 0.28(12.0, -0.10)         | 0.36(0.29, 0.06)           |
| 5     | 0.27(12.0)      | 0.33(0.22)          | 0.25(14.0, -0.07)        | 0.32(0.28, -0.03)                 | 0.37(12.0)      | 0.47(0.27)          | 0.38(12.0, <b>0.03</b> )  | 0.48(0.26, 0.02)           |
| 6     | 0.42(14.0)      | 0.47(0.12)          | 0.42(13.0, <b>0.00</b> ) | 0.47(0.12, <b>0.00</b> )          | 0.30(13.0)      | 0.28(-0.07)         | 0.32(12.0, 0.07)          | 0.30(-0.06, 0.07)          |
| 7     | 0.21(12.0)      | 0.20(-0.05)         | 0.19(14.0, -0.10)        | 0.21(0.11, 0.05)                  | 0.50(11.0)      | 0.60(0.20)          | 0.47(12.0, -0.06)         | 0.59(0.26, -0.02)          |
| 8     | 0.34(13.0)      | 0.25(-0.26)         | 0.34(15.0, <b>0.00</b> ) | 0.26(-0.24, 0.04)                 | 0.29(13.0)      | 0.34(0.17)          | 0.30(12.0, 0.03)          | 0.35(0.17, 0.03)           |
| 9     | 0.23(13.0)      | 0.23( <b>0.00</b> ) | 0.28(13.0, 0.22)         | 0.22(-0.21, -0.04)                | 0.31(13.0)      | 0.34(0.10)          | 0.33(13.0, 0.06)          | 0.34(0.03, <b>0.00</b> )   |
| 10    | 0.42(13.0)      | 0.47(0.12)          | 0.43(13.0, 0.02)         | 0.47(0.09, <b>0.00</b> )          | 0.33(14.0)      | 0.41(0.24)          | 0.42(13.0, 0.27)          | 0.45(0.07, 0.10)           |
| 11    | 0.24(15.0)      | 0.29(0.21)          | 0.28(15.0, 0.17)         | 0.30(0.07, 0.03)                  | 0.34(13.0)      | 0.37(0.09)          | 0.36(11.0, 0.06)          | 0.37(0.03, <b>0.00</b> )   |
| 12    | 0.36(13.0)      | 0.41(0.14)          | 0.41(15.0, 0.14)         | 0.41( <b>0.00</b> , <b>0.00</b> ) | 0.51(13.0)      | 0.62(0.22)          | 0.55(11.0, 0.08)          | 0.63(0.15, 0.02)           |
| 13    | 0.37(12.0)      | 0.35(-0.05)         | 0.28(13.0, -0.24)        | 0.35(0.25, <b>0.00</b> )          | 0.42(13.0)      | 0.41(-0.02)         | 0.42(12.0, <b>0.00</b> )  | 0.4(-0.05, -0.02)          |
| 14    | 0.31(13.0)      | 0.24(-0.23)         | 0.26(12.0, -0.16)        | 0.26( <b>0.00</b> , 0.08)         | 0.37(13.0)      | 0.37( <b>0.00</b> ) | 0.38(12.0, 0.03)          | 0.39(0.03, 0.05)           |
| 15    | 0.24(13.0)      | 0.30(0.25)          | 0.20(15.0, -0.17)        | 0.29(0.45, -0.03)                 | 0.46(12.0)      | 0.53(0.15)          | 0.48(12.0, 0.04)          | 0.52(0.08, -0.02)          |
| 16    | 0.33(12.0)      | 0.42(0.27)          | 0.27(13.0, -0.18)        | 0.42(0.56, <b>0.00</b> )          | 0.47(13.0)      | 0.53(0.13)          | 0.50(12.0, 0.06)          | 0.54(0.08, 0.02)           |
| 17    | 0.07(16.0)      | 0.11(0.57)          | 0.12(13.0, 0.71)         | 0.12( <b>0.00</b> , 0.09)         | 0.57(12.0)      | 0.60(0.05)          | 0.58(13.0, 0.02)          | 0.59(0.02, -0.02)          |
| 18    | 0.13(14.0)      | 0.20(0.54)          | 0.09(13.0, -0.31)        | 0.19(1.11, -0.05)                 | 0.21(13.0)      | 0.23(0.10)          | 0.22(13.0, <b>0.05</b> )  | 0.22( <b>0.00</b> , -0.04) |
| 19    | 0.36(12.0)      | 0.39(0.08)          | 0.43(15.0, 0.19)         | 0.40(-0.07, 0.03)                 | 0.40(12.0)      | 0.40( <b>0.00</b> ) | 0.39(12.0, <b>-0.03</b> ) | 0.39( <b>0.00</b> , -0.03) |
| 20    | 0.27(12.0)      | 0.41(0.52)          | 0.30(13.0, 0.11)         | 0.41(0.37, <b>0.00</b> )          | 0.39(13.0)      | 0.44(0.13)          | 0.32(13.0, -0.18)         | 0.43(0.34, -0.02)          |
| 21    | 0.43(12.0)      | 0.47(0.09)          | 0.37(14.0, -0.14)        | 0.47(0.27, <b>0.00</b> )          | 0.40(12.0)      | 0.45(0.13)          | 0.40(12.0, <b>0.00</b> )  | 0.45(0.13, <b>0.00</b> )   |
| 22    | 0.41(13.0)      | 0.43(0.05)          | 0.37(17.0, -0.10)        | 0.43(0.16, <b>0.00</b> )          | 0.37(14.0)      | 0.40(0.08)          | 0.39(12.0, 0.05)          | 0.42(0.08, 0.05)           |
| 23    | 0.28(13.0)      | 0.35(0.25)          | 0.25(14.0, -0.11)        | 0.35(0.40, <b>0.00</b> )          | 0.38(12.0)      | 0.38( <b>0.00</b> ) | 0.40(12.0, 0.05)          | 0.40( <b>0.00</b> , 0.05)  |
| 24    | 0.15(14.0)      | 0.21(0.40)          | 0.20(15.0, 0.33)         | 0.21(0.05, <b>0.00</b> )          | 0.42(15.0)      | 0.45(0.07)          | 0.46(12.0, 0.10)          | 0.45(-0.02, <b>0.00</b> )  |
| 25    | 0.18(13.0)      | 0.24(0.33)          | 0.18(15.0, <b>0.00</b> ) | 0.24(0.33, <b>0.00</b> )          | 0.25(13.0)      | 0.35(0.40)          | 0.31(13.0, 0.24)          | 0.37(0.19, 0.06)           |
| Mean  | 0.28(13.1)      | 0.32(0.14)          | 0.29(14.0, 0.01)         | 0.33(0.14, 0.01)                  | 0.37(12.8)      | 0.42(0.14)          | 0.39(12.1, 0.06)          | 0.43(0.10, 0.02)           |

<sup>a</sup> In parentheses is the number of QTL identified by QP based on the SE model; <sup>b</sup> In parentheses is the gain in prediction accuracy with GWP over QP based on the SE model; <sup>c</sup> The first value in parentheses is the number of QTL identified by QP based on the ME model; and the second one the gain

with ME over SE for QP; <sup>d</sup> The first value in parentheses is the gain in accuracy with GWP over QP based on the ME model; and the second one is the gain with ME over SE using GWP. Bold in parentheses indicates the number is not significant at  $\alpha = 0.05$ .

**Table S13 Accuracy of AP prediction for environment E3 with QP and GWP in CV1**

| PopId | LL              |                     |                           |                                   | LW              |                     |                          |                                   |
|-------|-----------------|---------------------|---------------------------|-----------------------------------|-----------------|---------------------|--------------------------|-----------------------------------|
|       | SE              |                     | ME                        |                                   | SE              |                     | ME                       |                                   |
|       | QP <sup>a</sup> | GWP <sup>b</sup>    | QP <sup>c</sup>           | GWP <sup>d</sup>                  | QP <sup>a</sup> | GWP <sup>b</sup>    | QP <sup>c</sup>          | GWP <sup>d</sup>                  |
| 1     | 0.31(12.0)      | 0.37(0.19)          | 0.25(14.0, -0.19)         | 0.37(0.48, <b>0.00</b> )          | 0.24(10.0)      | 0.24( <b>0.00</b> ) | 0.27(12.0, 0.13)         | 0.25(-0.07, 0.04)                 |
| 2     | 0.26(13.0)      | 0.27(0.04)          | 0.27(14.0, 0.04)          | 0.30(0.11, 0.11)                  | 0.38(12.0)      | 0.46(0.21)          | 0.43(12.0, 0.13)         | 0.47(0.09, 0.02)                  |
| 3     | 0.15(14.0)      | 0.22(0.47)          | 0.13(15.0, -0.13)         | 0.21(0.62, -0.05)                 | 0.31(11.0)      | 0.37(0.19)          | 0.34(11.0, 0.10)         | 0.36(0.06, -0.03)                 |
| 4     | 0.30(12.0)      | 0.42(0.40)          | 0.34(12.0, 0.13)          | 0.41(0.21, -0.02)                 | 0.22(11.0)      | 0.22( <b>0.00</b> ) | 0.18(12.0, -0.18)        | 0.24(0.33, 0.09)                  |
| 5     | 0.22(13.0)      | 0.20(-0.09)         | 0.17(14.0, -0.23)         | 0.21(0.24, 0.05)                  | 0.37(10.0)      | 0.44(0.19)          | 0.37(12.0, <b>0.00</b> ) | 0.43(0.16, -0.02)                 |
| 6     | 0.41(13.0)      | 0.47(0.15)          | 0.40(13.0, -0.02)         | 0.46(0.15, -0.02)                 | 0.21(9.0)       | 0.26(0.24)          | 0.26(12.0, 0.24)         | 0.26( <b>0.00</b> , <b>0.00</b> ) |
| 7     | 0.21(13.0)      | 0.20(-0.05)         | 0.18(14.0, -0.14)         | 0.20(0.11, <b>0.00</b> )          | 0.21(8.0)       | 0.32(0.52)          | 0.27(12.0, 0.29)         | 0.33(0.22, 0.03)                  |
| 8     | 0.27(14.0)      | 0.29(0.07)          | 0.35(15.0, 0.30)          | 0.29(-0.17, <b>0.00</b> )         | 0.23(11.0)      | 0.27(0.17)          | 0.26(12.0, 0.13)         | 0.28(0.08, 0.04)                  |
| 9     | 0.25(13.0)      | 0.35(0.40)          | 0.34(13.0, 0.36)          | 0.36(0.06, 0.03)                  | 0.31(10.0)      | 0.31( <b>0.00</b> ) | 0.32(13.0, 0.03)         | 0.30(-0.06, -0.03)                |
| 10    | 0.36(12.0)      | 0.47(0.31)          | 0.35(13.0, <b>-0.03</b> ) | 0.46(0.31, -0.02)                 | 0.41(9.0)       | 0.56(0.37)          | 0.38(13.0, -0.07)        | 0.55(0.45, -0.02)                 |
| 11    | 0.16(13.0)      | 0.22(0.38)          | 0.11(15.0, -0.31)         | 0.23(1.09, 0.05)                  | 0.17(10.0)      | 0.26(0.53)          | 0.19(11.0, 0.12)         | 0.27(0.42, 0.04)                  |
| 12    | 0.20(13.0)      | 0.32(0.60)          | 0.24(15.0, 0.20)          | 0.31(0.29, -0.03)                 | 0.22(12.0)      | 0.34(0.55)          | 0.31(11.0, 0.41)         | 0.34(0.10, <b>0.00</b> )          |
| 13    | 0.39(13.0)      | 0.36(-0.08)         | 0.40(13.0, <b>0.03</b> )  | 0.39(-0.03, 0.08)                 | 0.45(10.0)      | 0.4(-0.11)          | 0.45(12.0, <b>0.00</b> ) | 0.38(-0.16, -0.05)                |
| 14    | 0.19(13.0)      | 0.24(0.26)          | 0.17(12.0, -0.11)         | 0.24(0.41, <b>0.00</b> )          | 0.24(10.0)      | 0.26(0.08)          | 0.30(12.0, 0.25)         | 0.28(-0.07, 0.08)                 |
| 15    | 0.20(13.0)      | 0.24(0.20)          | 0.18(15.0, -0.10)         | 0.25(0.39, 0.04)                  | 0.44(9.0)       | 0.49(0.11)          | 0.45(12.0, 0.02)         | 0.50(0.11, 0.02)                  |
| 16    | 0.16(12.0)      | 0.16( <b>0.00</b> ) | 0.16(13.0, <b>0.00</b> )  | 0.17(0.06, 0.06)                  | 0.38(11.0)      | 0.46(0.21)          | 0.43(12.0, 0.13)         | 0.49(0.14, 0.07)                  |
| 17    | 0.26(14.0)      | 0.29(0.12)          | 0.29(13.0, 0.12)          | 0.29( <b>0.00</b> , <b>0.00</b> ) | 0.26(10.0)      | 0.30(0.15)          | 0.28(13.0, 0.08)         | 0.33(0.18, 0.10)                  |
| 18    | 0.06(13.0)      | 0.11(0.83)          | 0.17(13.0, 1.83)          | 0.13(-0.24, 0.18)                 | 0.29(9.0)       | 0.32(0.10)          | 0.34(13.0, 0.17)         | 0.33(-0.03, 0.03)                 |
| 19    | 0.39(13.0)      | 0.36(-0.08)         | 0.39(15.0, <b>0.00</b> )  | 0.35(-0.10, -0.03)                | 0.36(10.0)      | 0.29(-0.19)         | 0.35(12.0, -0.03)        | 0.30(-0.14, 0.03)                 |
| 20    | 0.23(12.0)      | 0.36(0.57)          | 0.24(13.0, <b>0.04</b> )  | 0.38(0.58, 0.06)                  | 0.39(12.0)      | 0.44(0.13)          | 0.41(13.0, 0.05)         | 0.46(0.12, 0.05)                  |
| 21    | 0.26(13.0)      | 0.44(0.69)          | 0.32(14.0, 0.23)          | 0.46(0.44, 0.05)                  | 0.38(9.0)       | 0.40(0.05)          | 0.40(12.0, 0.05)         | 0.41(0.02, 0.02)                  |
| 22    | 0.22(13.0)      | 0.20(-0.09)         | 0.30(17.0, 0.36)          | 0.21(-0.30, 0.05)                 | 0.20(11.0)      | 0.26(0.30)          | 0.25(12.0, 0.25)         | 0.26(0.04, <b>0.00</b> )          |
| 23    | 0.19(13.0)      | 0.22(0.16)          | 0.21(14.0, 0.11)          | 0.23(0.10, 0.05)                  | 0.19(10.0)      | 0.27(0.42)          | 0.23(12.0, 0.21)         | 0.28(0.22, 0.04)                  |
| 24    | 0.13(11.0)      | 0.19(0.46)          | 0.14(15.0, <b>0.08</b> )  | 0.19(0.36, <b>0.00</b> )          | 0.39(11.0)      | 0.36(-0.08)         | 0.41(12.0, 0.05)         | 0.38(-0.07, 0.06)                 |
| 25    | 0.30(13.0)      | 0.39(0.30)          | 0.25(15.0, -0.17)         | 0.38(0.52, -0.03)                 | 0.20(12.0)      | 0.24(0.20)          | 0.24(13.0, 0.20)         | 0.24( <b>0.00</b> , <b>0.00</b> ) |
| Mean  | 0.24(12.8)      | 0.29(0.21)          | 0.25(14.0, 0.04)          | 0.30(0.20, 0.01)                  | 0.30(10.3)      | 0.34(0.13)          | 0.32(12.1, 0.09)         | 0.35(0.09, 0.03)                  |

<sup>a</sup> In parentheses is the number of QTL identified by QP based on the SE model; <sup>b</sup> In parentheses is the gain in prediction accuracy with GWP over QP based on the SE model; <sup>c</sup> The first value in parentheses is the number of QTL identified by QP based on the ME model; and the second one the gain

with ME over SE for QP; <sup>d</sup> The first value in parentheses is the gain in accuracy with GWP over QP based on the ME model; and the second one is the gain with ME over SE using GWP. Bold in parentheses indicates the number is not significant at  $\alpha = 0.05$ .



**Table S14 Accuracy of AP prediction for environment E4 with QP and GWP in CV1**

| PopId | LL              |                     |                          |                           | LW              |                  |                          |                                   |
|-------|-----------------|---------------------|--------------------------|---------------------------|-----------------|------------------|--------------------------|-----------------------------------|
|       | SE              |                     | ME                       |                           | SE              |                  | ME                       |                                   |
|       | QP <sup>a</sup> | GWP <sup>b</sup>    | QP <sup>c</sup>          | GWP <sup>d</sup>          | QP <sup>a</sup> | GWP <sup>b</sup> | QP <sup>c</sup>          | GWP <sup>d</sup>                  |
| 1     | 0.25(15.0)      | 0.26(0.04)          | 0.18(14.0, -0.28)        | 0.27(0.5, 0.04)           | 0.26(13.0)      | 0.31(0.19)       | 0.30(12.0, 0.15)         | 0.31(0.03, <b>0.00</b> )          |
| 2     | 0.28(15.0)      | 0.25(-0.11)         | 0.19(14.0, -0.32)        | 0.23(0.21, -0.08)         | 0.39(13.0)      | 0.43(0.10)       | 0.39(12.0, <b>0.00</b> ) | 0.43(0.10, <b>0.00</b> )          |
| 3     | 0.25(17.0)      | 0.24(-0.04)         | 0.15(15.0, -0.40)        | 0.25(0.67, 0.04)          | 0.38(12.0)      | 0.39(0.03)       | 0.35(11.0, -0.08)        | 0.40(0.14, 0.03)                  |
| 4     | 0.40(13.0)      | 0.42(0.05)          | 0.36(12.0, -0.10)        | 0.43(0.19, 0.02)          | 0.25(13.0)      | 0.29(0.16)       | 0.26(12.0, <b>0.04</b> ) | 0.29(0.12, <b>0.00</b> )          |
| 5     | 0.23(15.0)      | 0.38(0.65)          | 0.23(14.0, <b>0.00</b> ) | 0.38(0.65, <b>0.00</b> )  | 0.31(13.0)      | 0.33(0.06)       | 0.29(12.0, -0.06)        | 0.36(0.24, 0.09)                  |
| 6     | 0.35(15.0)      | 0.46(0.31)          | 0.42(13.0, 0.20)         | 0.48(0.14, 0.04)          | 0.27(13.0)      | 0.33(0.22)       | 0.29(12.0, 0.07)         | 0.33(0.14, <b>0.00</b> )          |
| 7     | 0.16(13.0)      | 0.32(1.00)          | 0.19(14.0, 0.19)         | 0.31(0.63, -0.03)         | 0.45(12.0)      | 0.52(0.16)       | 0.47(12.0, 0.04)         | 0.53(0.13, 0.02)                  |
| 8     | 0.33(14.0)      | 0.34(0.03)          | 0.38(15.0, 0.15)         | 0.35(-0.08, 0.03)         | 0.26(12.0)      | 0.39(0.50)       | 0.30(12.0, 0.15)         | 0.40(0.33, 0.03)                  |
| 9     | 0.34(15.0)      | 0.35(0.03)          | 0.32(13.0, -0.06)        | 0.36(0.13, 0.03)          | 0.34(13.0)      | 0.40(0.18)       | 0.35(13.0, 0.03)         | 0.41(0.17, 0.02)                  |
| 10    | 0.40(16.0)      | 0.46(0.15)          | 0.34(13.0, -0.15)        | 0.48(0.41, 0.04)          | 0.47(13.0)      | 0.53(0.13)       | 0.47(13.0, <b>0.00</b> ) | 0.54(0.15, 0.02)                  |
| 11    | 0.22(13.0)      | 0.27(0.23)          | 0.17(15.0, -0.23)        | 0.27(0.59, <b>0.00</b> )  | 0.35(12.0)      | 0.36(0.03)       | 0.34(11.0, -0.03)        | 0.36(0.06, <b>0.00</b> )          |
| 12    | 0.31(12.0)      | 0.31(0.00)          | 0.34(15.0, 0.10)         | 0.34( <b>0.00</b> , 0.10) | 0.56(12.0)      | 0.57(0.02)       | 0.54(11.0, -0.04)        | 0.58(0.07, 0.02)                  |
| 13    | 0.25(14.0)      | 0.16(-0.36)         | 0.20(13.0, -0.20)        | 0.16(-0.20, <b>0.00</b> ) | 0.32(13.0)      | 0.32(0.00)       | 0.37(12.0, 0.16)         | 0.35(-0.05, 0.09)                 |
| 14    | 0.29(13.0)      | 0.35(0.21)          | 0.18(12.0, -0.38)        | 0.33(0.83, -0.06)         | 0.32(13.0)      | 0.33(0.03)       | 0.36(12.0, 0.12)         | 0.33(-0.08, <b>0.00</b> )         |
| 15    | 0.10(12.0)      | 0.20(1.00)          | 0.15(15.0, 0.50)         | 0.21(0.40, 0.05)          | 0.58(13.0)      | 0.60(0.03)       | 0.57(12.0, -0.02)        | 0.60(0.05, <b>0.00</b> )          |
| 16    | 0.17(12.0)      | 0.23(0.35)          | 0.15(13.0, -0.12)        | 0.24(0.60, 0.04)          | 0.47(12.0)      | 0.57(0.21)       | 0.52(12.0, 0.11)         | 0.58(0.12, 0.02)                  |
| 17    | 0.15(16.0)      | 0.25(0.67)          | 0.12(13.0, -0.20)        | 0.24(1.00, -0.04)         | 0.55(13.0)      | 0.53(-0.04)      | 0.53(13.0, -0.04)        | 0.53( <b>0.00</b> , <b>0.00</b> ) |
| 18    | 0.13(14.0)      | 0.13( <b>0.00</b> ) | 0.16(13.0, 0.23)         | 0.13(-0.19, <b>0.00</b> ) | 0.40(13.0)      | 0.38(-0.05)      | 0.39(13.0, -0.03)        | 0.38(-0.03, <b>0.00</b> )         |
| 19    | 0.21(14.0)      | 0.19(-0.10)         | 0.22(15.0, <b>0.05</b> ) | 0.19(-0.14, <b>0.00</b> ) | 0.38(13.0)      | 0.36(-0.05)      | 0.43(12.0, 0.13)         | 0.36(-0.16, <b>0.00</b> )         |
| 20    | 0.30(12.0)      | 0.41(0.37)          | 0.33(13.0, 0.10)         | 0.41(0.24, <b>0.00</b> )  | 0.44(12.0)      | 0.52(0.18)       | 0.42(13.0, -0.05)        | 0.52(0.24, <b>0.00</b> )          |
| 21    | 0.45(14.0)      | 0.52(0.16)          | 0.42(14.0, -0.07)        | 0.52(0.24, <b>0.00</b> )  | 0.37(13.0)      | 0.41(0.11)       | 0.43(12.0, 0.16)         | 0.44(0.02, 0.07)                  |
| 22    | 0.20(14.0)      | 0.25(0.25)          | 0.21(17.0, <b>0.05</b> ) | 0.24(0.14, -0.04)         | 0.31(12.0)      | 0.40(0.29)       | 0.31(12.0, <b>0.00</b> ) | 0.40(0.29, <b>0.00</b> )          |
| 23    | 0.13(17.0)      | 0.13( <b>0.00</b> ) | 0.10(14.0, -0.23)        | 0.13(0.30, <b>0.00</b> )  | 0.29(13.0)      | 0.30(0.03)       | 0.32(12.0, 0.10)         | 0.30(-0.06, <b>0.00</b> )         |
| 24    | 0.18(14.0)      | 0.29(0.61)          | 0.14(15.0, -0.22)        | 0.28(1.00, -0.03)         | 0.48(13.0)      | 0.50(0.04)       | 0.53(12.0, 0.10)         | 0.50(-0.06, <b>0.00</b> )         |
| 25    | 0.19(11.0)      | 0.29(0.53)          | 0.18(15.0, -0.05)        | 0.30(0.67, 0.03)          | 0.36(13.0)      | 0.44(0.22)       | 0.32(13.0, -0.11)        | 0.43(0.34, -0.02)                 |
| Mean  | 0.25(14.0)      | 0.30(0.20)          | 0.23(14.0, -0.07)        | 0.30(0.30, 0.00)          | 0.38(12.7)      | 0.42(0.11)       | 0.39(12.1, 0.03)         | 0.43(0.10, 0.01)                  |

<sup>a</sup> In parentheses is the number of QTL identified by QP based on the SE model; <sup>b</sup> In parentheses is the gain in prediction accuracy with GWP over QP based on the SE model; <sup>c</sup> The first value in parentheses is the number of QTL identified by QP based on the ME model; and the second one the gain

with ME over SE for QP; <sup>d</sup> The first value in parentheses is the gain in accuracy with GWP over QP based on the ME model; and the second one is the gain with ME over SE using GWP. Bold in parentheses indicates the number is not significant at  $\alpha = 0.05$ .

**Table S15 Accuracy of WP prediction for environment E1 with QP and GWP in CV2**

| PopId | LL              |                  |                          |                  | LW              |                  |                          |                  |
|-------|-----------------|------------------|--------------------------|------------------|-----------------|------------------|--------------------------|------------------|
|       | SE              |                  | ME                       |                  | SE              |                  | ME                       |                  |
|       | QP <sup>a</sup> | GWP <sup>b</sup> | QP <sup>c</sup>          | GWP <sup>d</sup> | QP <sup>a</sup> | GWP <sup>b</sup> | QP <sup>c</sup>          | GWP <sup>d</sup> |
| 1     | 0.23(1.6)       | 0.33(0.43)       | 0.41(3.4, 0.78)          | 0.45(0.10, 0.36) | 0.06(1.3)       | 0.31(4.17)       | 0.18(1.6, 2.00)          | 0.49(1.72, 0.58) |
| 2     | 0.03(1.1)       | 0.18(5.00)       | 0.06(0.8, 1.00)          | 0.42(6.00, 1.33) | 0.21(2.0)       | 0.40(0.90)       | 0.24(1.8, <b>0.14</b> )  | 0.55(1.29, 0.38) |
| 3     | 0.09(1.2)       | 0.26(1.89)       | 0.06(0.8, <b>-0.33</b> ) | 0.37(5.17, 0.42) | 0.39(3.3)       | 0.56(0.44)       | 0.43(2.6, 0.10)          | 0.68(0.58, 0.21) |
| 4     | 0.24(2.8)       | 0.49(1.04)       | 0.34(3.2, 0.42)          | 0.60(0.76, 0.22) | 0.23(2.4)       | 0.50(1.17)       | 0.23(1.6, <b>0.00</b> )  | 0.61(1.65, 0.22) |
| 5     | 0.14(1.8)       | 0.33(1.36)       | 0.31(1.9, 1.21)          | 0.54(0.74, 0.64) | 0.06(1.3)       | 0.21(2.50)       | 0.10(0.9, 0.67)          | 0.46(3.60, 1.19) |
| 6     | 0.25(2.4)       | 0.50(1.00)       | 0.31(2.3, 0.24)          | 0.59(0.90, 0.18) | 0.02(1.6)       | 0.31(14.50)      | 0.05(1.0, 1.50)          | 0.43(7.60, 0.39) |
| 7     | 0.34(2.6)       | 0.52(0.53)       | 0.38(1.9, 0.12)          | 0.67(0.76, 0.29) | 0.23(2.5)       | 0.48(1.09)       | 0.29(1.9, 0.26)          | 0.61(1.10, 0.27) |
| 8     | 0.07(1.7)       | 0.28(3.00)       | 0.19(1.7, 1.71)          | 0.51(1.68, 0.82) | 0.07(1.5)       | 0.30(3.29)       | 0.28(2.2, 3.00)          | 0.49(0.75, 0.63) |
| 9     | 0.30(2.1)       | 0.35(0.17)       | 0.31(1.7, <b>0.03</b> )  | 0.50(0.61, 0.43) | 0.02(1.0)       | 0.18(8.00)       | 0.21(1.7, 9.50)          | 0.42(1.00, 1.33) |
| 10    | 0.26(2.5)       | 0.46(0.77)       | 0.32(2.1, 0.23)          | 0.64(1.00, 0.39) | 0.15(2.2)       | 0.37(1.47)       | 0.27(2.4, 0.80)          | 0.62(1.30, 0.68) |
| 11    | 0.30(2.5)       | 0.40(0.33)       | 0.41(2.6, 0.37)          | 0.56(0.37, 0.40) | 0.12(2.3)       | 0.40(2.33)       | 0.16(1.7, 0.33)          | 0.48(2.00, 0.20) |
| 12    | 0.25(3.0)       | 0.50(1.00)       | 0.33(2.9, 0.32)          | 0.65(0.97, 0.30) | 0.30(3.1)       | 0.54(0.80)       | 0.40(2.8, 0.33)          | 0.64(0.60, 0.19) |
| 13    | 0.21(2.7)       | 0.45(1.14)       | 0.27(1.6, 0.29)          | 0.64(1.37, 0.42) | 0.30(2.6)       | 0.49(0.63)       | 0.33(1.7, <b>0.10</b> )  | 0.61(0.85, 0.24) |
| 14    | 0.10(2.0)       | 0.36(2.60)       | 0.21(1.6, 1.10)          | 0.55(1.62, 0.53) | 0.20(2.3)       | 0.44(1.20)       | 0.22(1.4, <b>0.10</b> )  | 0.62(1.82, 0.41) |
| 15    | 0.08(1.7)       | 0.28(2.50)       | 0.17(1.4, 1.12)          | 0.47(1.76, 0.68) | 0.13(1.7)       | 0.30(1.31)       | 0.25(2.5, 0.92)          | 0.43(0.72, 0.43) |
| 16    | 0.20(1.7)       | 0.34(0.70)       | 0.23(1.2, 0.15)          | 0.48(1.09, 0.41) | 0.25(2.3)       | 0.45(0.80)       | 0.38(2.7, 0.52)          | 0.56(0.47, 0.24) |
| 17    | 0.05(1.2)       | 0.27(4.40)       | 0.09(0.8, 0.80)          | 0.39(3.33, 0.44) | 0.32(3.0)       | 0.55(0.72)       | 0.43(3.5, 0.34)          | 0.68(0.58, 0.24) |
| 18    | 0.10(1.4)       | 0.27(1.70)       | 0.06(0.6, -0.40)         | 0.36(5.00, 0.33) | 0.19(2.0)       | 0.40(1.11)       | 0.22(1.6, <b>0.16</b> )  | 0.47(1.14, 0.17) |
| 19    | 0.27(2.2)       | 0.37(0.37)       | 0.21(1.5, -0.22)         | 0.52(1.48, 0.41) | 0.28(2.3)       | 0.41(0.46)       | 0.37(2.1, 0.32)          | 0.58(0.57, 0.41) |
| 20    | 0.19(2.6)       | 0.47(1.47)       | 0.16(1.5, <b>-0.16</b> ) | 0.61(2.81, 0.30) | 0.23(2.3)       | 0.48(1.09)       | 0.34(2.2, 0.48)          | 0.60(0.76, 0.25) |
| 21    | 0.33(3.0)       | 0.48(0.45)       | 0.42(3.3, 0.27)          | 0.61(0.45, 0.27) | 0.18(2.1)       | 0.47(1.61)       | 0.16(1.7, <b>-0.11</b> ) | 0.54(2.38, 0.15) |
| 22    | 0.15(1.3)       | 0.36(1.40)       | 0.25(1.4, 0.67)          | 0.51(1.04, 0.42) | 0.05(1.4)       | 0.31(5.20)       | 0.18(1.6, 2.60)          | 0.47(1.61, 0.52) |
| 23    | 0.32(3.0)       | 0.44(0.38)       | 0.27(2.0, -0.16)         | 0.54(1.00, 0.23) | 0.08(1.5)       | 0.30(2.75)       | 0.25(2.4, 2.12)          | 0.54(1.16, 0.80) |
| 24    | 0.20(2.3)       | 0.48(1.40)       | 0.12(1.1, -0.40)         | 0.57(3.75, 0.19) | 0.35(3.2)       | 0.50(0.43)       | 0.45(2.7, 0.29)          | 0.64(0.42, 0.28) |
| 25    | 0.18(2.6)       | 0.50(1.78)       | 0.20(1.8, 0.11)          | 0.61(2.05, 0.22) | 0.31(3.1)       | 0.47(0.52)       | 0.32(2.2, <b>0.03</b> )  | 0.60(0.87, 0.28) |
| Mean  | 0.20(2.1)       | 0.39(0.98)       | 0.24(1.8, 0.25)          | 0.53(1.19, 0.38) | 0.19(2.2)       | 0.41(1.14)       | 0.27(2.0, 0.42)          | 0.55(1.05, 0.36) |

<sup>a</sup> In parentheses is the number of QTL identified by QP based on the SE model; <sup>b</sup> In parentheses is the gain in prediction accuracy with GWP over QP based on the SE model; <sup>c</sup> The first value in parentheses is the number of QTL identified by QP based on the ME model; and the second one the gain

with ME over SE for QP; <sup>d</sup> The first value in parentheses is the gain in accuracy with GWP over QP based on the ME model; and the second one is the gain in accuracy with ME over SE using GWP. Bold in parentheses indicates the number is not significant at  $\alpha = 0.05$ .

**Table S16 Accuracy of WP prediction for environment E2 with QP and GWP in CV2**

| PopId | LL              |                  |                          |                  | LW              |                  |                         |                  |
|-------|-----------------|------------------|--------------------------|------------------|-----------------|------------------|-------------------------|------------------|
|       | SE              |                  | ME                       |                  | SE              |                  | ME                      |                  |
|       | QP <sup>a</sup> | GWP <sup>b</sup> | QP <sup>c</sup>          | GWP <sup>d</sup> | QP <sup>a</sup> | GWP <sup>b</sup> | QP <sup>c</sup>         | GWP <sup>d</sup> |
| 1     | 0.50(3.8)       | 0.67(0.34)       | 0.58(3.4, 0.16)          | 0.75(0.29, 0.12) | 0.20(2.5)       | 0.46(1.30)       | 0.24(1.6, <b>0.20</b> ) | 0.57(1.37, 0.24) |
| 2     | 0.10(2.1)       | 0.40(3.00)       | 0.08(0.8, <b>-0.20</b> ) | 0.56(6.00, 0.40) | 0.21(2.6)       | 0.48(1.29)       | 0.28(1.8, 0.33)         | 0.64(1.29, 0.33) |
| 3     | 0.24(1.7)       | 0.20(-0.17)      | 0.08(0.8, -0.67)         | 0.30(2.75, 0.50) | 0.34(3.3)       | 0.60(0.76)       | 0.45(2.6, 0.32)         | 0.70(0.56, 0.17) |
| 4     | 0.22(3.0)       | 0.56(1.55)       | 0.35(3.2, 0.59)          | 0.68(0.94, 0.21) | 0.41(3.1)       | 0.61(0.49)       | 0.32(1.6, -0.22)        | 0.70(1.19, 0.15) |
| 5     | 0.27(2.8)       | 0.50(0.85)       | 0.31(1.9, 0.15)          | 0.64(1.06, 0.28) | 0.08(2.3)       | 0.46(4.75)       | 0.15(0.9, 0.87)         | 0.64(3.27, 0.39) |
| 6     | 0.22(2.8)       | 0.47(1.14)       | 0.25(2.3, <b>0.14</b> )  | 0.58(1.32, 0.23) | 0.06(1.2)       | 0.31(4.17)       | 0.09(1.0, <b>0.50</b> ) | 0.37(3.11, 0.19) |
| 7     | 0.27(2.1)       | 0.41(0.52)       | 0.33(1.9, 0.22)          | 0.62(0.88, 0.51) | 0.34(2.9)       | 0.59(0.74)       | 0.35(1.9, <b>0.03</b> ) | 0.72(1.06, 0.22) |
| 8     | 0.10(2.0)       | 0.34(2.40)       | 0.21(1.7, 1.10)          | 0.51(1.43, 0.50) | 0.24(1.8)       | 0.36(0.50)       | 0.35(2.2, 0.46)         | 0.53(0.51, 0.47) |
| 9     | 0.10(1.9)       | 0.33(2.30)       | 0.18(1.7, 0.80)          | 0.46(1.56, 0.39) | 0.23(2.3)       | 0.47(1.04)       | 0.34(1.7, 0.48)         | 0.54(0.59, 0.15) |
| 10    | 0.22(2.9)       | 0.51(1.32)       | 0.31(2.1, 0.41)          | 0.65(1.10, 0.27) | 0.13(1.9)       | 0.36(1.77)       | 0.26(2.4, 1.00)         | 0.46(0.77, 0.28) |
| 11    | 0.27(3.0)       | 0.52(0.93)       | 0.40(2.6, 0.48)          | 0.62(0.55, 0.19) | 0.29(2.1)       | 0.41(0.41)       | 0.29(1.7, <b>0.00</b> ) | 0.54(0.86, 0.32) |
| 12    | 0.24(3.1)       | 0.55(1.29)       | 0.36(2.9, 0.50)          | 0.68(0.89, 0.24) | 0.29(3.6)       | 0.58(1.00)       | 0.38(2.8, 0.31)         | 0.65(0.71, 0.12) |
| 13    | 0.22(2.3)       | 0.39(0.77)       | 0.32(1.6, 0.45)          | 0.65(1.03, 0.67) | 0.18(2.2)       | 0.42(1.33)       | 0.31(1.7, 0.72)         | 0.60(0.94, 0.43) |
| 14    | 0.32(2.7)       | 0.42(0.31)       | 0.25(1.6, -0.22)         | 0.58(1.32, 0.38) | 0.04(1.4)       | 0.25(5.25)       | 0.12(1.4, 2.00)         | 0.45(2.75, 0.80) |
| 15    | 0.26(3.0)       | 0.48(0.85)       | 0.27(1.4, <b>0.04</b> )  | 0.65(1.41, 0.35) | 0.23(3.2)       | 0.55(1.39)       | 0.32(2.5, 0.39)         | 0.67(1.09, 0.22) |
| 16    | 0.19(2.0)       | 0.33(0.74)       | 0.21(1.2, <b>0.11</b> )  | 0.46(1.19, 0.39) | 0.42(3.3)       | 0.55(0.31)       | 0.46(2.7, 0.10)         | 0.64(0.39, 0.16) |
| 17    | 0.05(0.8)       | 0.12(1.40)       | 0.09(0.8, 0.80)          | 0.29(2.22, 1.42) | 0.41(3.6)       | 0.61(0.49)       | 0.47(3.5, 0.15)         | 0.73(0.55, 0.20) |
| 18    | 0.02(1.3)       | 0.27(12.50)      | 0.07(0.6, 2.50)          | 0.40(4.71, 0.48) | 0.17(1.7)       | 0.31(0.82)       | 0.24(1.6, 0.41)         | 0.50(1.08, 0.61) |
| 19    | 0.07(1.7)       | 0.27(2.86)       | 0.11(1.5, 0.57)          | 0.40(2.64, 0.48) | 0.20(2.2)       | 0.41(1.05)       | 0.34(2.1, 0.70)         | 0.57(0.68, 0.39) |
| 20    | 0.12(2.3)       | 0.52(3.33)       | 0.16(1.5, 0.33)          | 0.66(3.12, 0.27) | 0.32(2.6)       | 0.54(0.69)       | 0.40(2.2, 0.25)         | 0.69(0.72, 0.28) |
| 21    | 0.35(3.5)       | 0.58(0.66)       | 0.48(3.3, 0.37)          | 0.70(0.46, 0.21) | 0.13(1.9)       | 0.33(1.54)       | 0.20(1.7, 0.54)         | 0.44(1.20, 0.33) |
| 22    | 0.32(2.6)       | 0.50(0.56)       | 0.24(1.4, -0.25)         | 0.60(1.50, 0.20) | 0.32(3.0)       | 0.59(0.84)       | 0.27(1.6, -0.16)        | 0.68(1.52, 0.15) |
| 23    | 0.16(2.3)       | 0.43(1.69)       | 0.19(2.0, <b>0.19</b> )  | 0.53(1.79, 0.23) | 0.23(2.3)       | 0.37(0.61)       | 0.27(2.4, 0.17)         | 0.49(0.81, 0.32) |
| 24    | 0.01(1.0)       | 0.16(15.00)      | 0.10(1.1, 9.00)          | 0.44(3.40, 1.75) | 0.24(2.2)       | 0.45(0.88)       | 0.42(2.7, 0.75)         | 0.62(0.48, 0.38) |
| 25    | 0.08(2.0)       | 0.40(4.00)       | 0.14(1.8, 0.75)          | 0.57(3.07, 0.42) | 0.29(2.8)       | 0.48(0.66)       | 0.37(2.2, 0.28)         | 0.54(0.46, 0.13) |
| Mean  | 0.20(2.3)       | 0.41(1.10)       | 0.24(1.8, 0.23)          | 0.56(1.30, 0.35) | 0.24(2.5)       | 0.46(0.92)       | 0.31(2.0, 0.28)         | 0.59(0.91, 0.27) |

<sup>a</sup> In parentheses is the number of QTL identified by QP based on the SE model; <sup>b</sup> In parentheses is the gain in prediction accuracy with GWP over QP based on the SE model; <sup>c</sup> The first value in parentheses is the number of QTL identified by QP based on the ME model; and the second one the gain

with ME over SE for QP; <sup>d</sup> The first value in parentheses is the gain in accuracy with GWP over QP based on the ME model; and the second one is the gain in accuracy with ME over SE using GWP. Bold in parentheses indicates the number is not significant at  $\alpha = 0.05$ .

**Table S17 Accuracy of WP prediction for environment E3 with QP and GWP in CV2**

| PopId | LL              |                  |                          |                  | LW              |                  |                          |                  |
|-------|-----------------|------------------|--------------------------|------------------|-----------------|------------------|--------------------------|------------------|
|       | SE              |                  | ME                       |                  | SE              |                  | ME                       |                  |
|       | QP <sup>a</sup> | GWP <sup>b</sup> | QP <sup>c</sup>          | GWP <sup>d</sup> | QP <sup>a</sup> | GWP <sup>b</sup> | QP <sup>c</sup>          | GWP <sup>d</sup> |
| 1     | 0.34(2.6)       | 0.51(0.50)       | 0.47(3.4, <b>0.38</b> )  | 0.65(0.38, 0.27) | 0.12(1.7)       | 0.36(2.00)       | 0.15(1.6, <b>0.25</b> )  | 0.45(2.00, 0.25) |
| 2     | 0.12(1.9)       | 0.36(2.00)       | 0.08(0.8, -0.33)         | 0.51(5.38, 0.42) | 0.22(2.7)       | 0.52(1.36)       | 0.26(1.8, <b>0.18</b> )  | 0.65(1.50, 0.25) |
| 3     | 0.08(1.5)       | 0.23(1.88)       | 0.07(0.8, <b>-0.12</b> ) | 0.35(4.00, 0.52) | 0.25(2.0)       | 0.26(0.04)       | 0.36(2.6, 0.44)          | 0.46(0.28, 0.77) |
| 4     | 0.31(2.6)       | 0.51(0.65)       | 0.37(3.2, 0.19)          | 0.60(0.62, 0.18) | 0.01(1.1)       | 0.19(18.00)      | 0.13(1.6, 12.00)         | 0.38(1.92, 1.00) |
| 5     | 0.23(2.5)       | 0.46(1.00)       | 0.29(1.9, 0.26)          | 0.60(1.07, 0.30) | 0.03(1.4)       | 0.30(9.00)       | 0.08(0.9, 1.67)          | 0.52(5.50, 0.73) |
| 6     | 0.34(2.4)       | 0.47(0.38)       | 0.32(2.3, <b>-0.06</b> ) | 0.59(0.84, 0.26) | 0.08(1.8)       | 0.31(2.87)       | 0.08(1.0, <b>0.00</b> )  | 0.43(4.38, 0.39) |
| 7     | 0.28(2.3)       | 0.49(0.75)       | 0.31(1.9, <b>0.11</b> )  | 0.64(1.06, 0.31) | 0.22(2.1)       | 0.42(0.91)       | 0.29(1.9, 0.32)          | 0.59(1.03, 0.40) |
| 8     | 0.09(1.8)       | 0.32(2.56)       | 0.17(1.7, 0.89)          | 0.50(1.94, 0.56) | 0.13(2.4)       | 0.46(2.54)       | 0.26(2.2, 1.00)          | 0.54(1.08, 0.17) |
| 9     | 0.19(2.1)       | 0.42(1.21)       | 0.28(1.7, 0.47)          | 0.54(0.93, 0.29) | 0.18(2.5)       | 0.45(1.50)       | 0.31(1.7, 0.72)          | 0.57(0.84, 0.27) |
| 10    | 0.10(2.3)       | 0.42(3.20)       | 0.27(2.1, 1.70)          | 0.62(1.30, 0.48) | 0.32(3.5)       | 0.55(0.72)       | 0.31(2.4, <b>-0.03</b> ) | 0.62(1.00, 0.13) |
| 11    | 0.30(2.7)       | 0.53(0.77)       | 0.39(2.6, 0.30)          | 0.63(0.62, 0.19) | 0.12(2.0)       | 0.38(2.17)       | 0.17(1.7, 0.42)          | 0.52(2.06, 0.37) |
| 12    | 0.21(2.3)       | 0.42(1.00)       | 0.29(2.9, 0.38)          | 0.56(0.93, 0.33) | 0.05(1.4)       | 0.27(4.40)       | 0.23(2.8, 3.60)          | 0.41(0.78, 0.52) |
| 13    | 0.19(2.6)       | 0.43(1.26)       | 0.30(1.6, 0.58)          | 0.61(1.03, 0.42) | 0.06(1.9)       | 0.27(3.50)       | 0.26(1.7, 3.33)          | 0.51(0.96, 0.89) |
| 14    | 0.19(1.5)       | 0.33(0.74)       | 0.17(1.6, <b>-0.11</b> ) | 0.48(1.82, 0.45) | 0.09(1.5)       | 0.33(2.67)       | 0.18(1.4, 1.00)          | 0.53(1.94, 0.61) |
| 15    | 0.05(1.2)       | 0.25(4.00)       | 0.17(1.4, 2.40)          | 0.46(1.71, 0.84) | 0.17(2.6)       | 0.39(1.29)       | 0.27(2.5, 0.59)          | 0.57(1.11, 0.46) |
| 16    | 0.08(1.8)       | 0.33(3.12)       | 0.10(1.2, <b>0.25</b> )  | 0.43(3.30, 0.30) | 0.09(1.8)       | 0.36(3.00)       | 0.31(2.7, 2.44)          | 0.52(0.68, 0.44) |
| 17    | 0.10(1.6)       | 0.32(2.20)       | 0.12(0.8, <b>0.20</b> )  | 0.44(2.67, 0.38) | 0.10(1.8)       | 0.37(2.70)       | 0.32(3.5, 2.20)          | 0.54(0.69, 0.46) |
| 18    | 0.00(0.9)       | 0.18             | 0.05(0.6)                | 0.28(4.60, 0.56) | 0.34(2.2)       | 0.35(0.03)       | 0.29(1.6, -0.15)         | 0.47(0.62, 0.34) |
| 19    | 0.22(2.6)       | 0.46(1.09)       | 0.20(1.5, <b>-0.09</b> ) | 0.57(1.85, 0.24) | 0.21(2.0)       | 0.41(0.95)       | 0.35(2.1, 0.67)          | 0.54(0.54, 0.32) |
| 20    | 0.14(2.1)       | 0.32(1.29)       | 0.16(1.5, <b>0.14</b> )  | 0.49(2.06, 0.53) | 0.17(2.2)       | 0.44(1.59)       | 0.33(2.2, 0.94)          | 0.58(0.76, 0.32) |
| 21    | 0.25(2.7)       | 0.47(0.88)       | 0.46(3.3, 0.84)          | 0.63(0.37, 0.34) | 0.21(2.4)       | 0.41(0.95)       | 0.21(1.7, <b>0.00</b> )  | 0.50(1.38, 0.22) |
| 22    | 0.23(1.9)       | 0.39(0.70)       | 0.28(1.4, 0.22)          | 0.51(0.82, 0.31) | 0.10(1.6)       | 0.34(2.40)       | 0.20(1.6, 1.00)          | 0.52(1.60, 0.53) |
| 23    | 0.21(1.7)       | 0.31(0.48)       | 0.27(2.0, 0.29)          | 0.50(0.85, 0.61) | 0.15(2.1)       | 0.40(1.67)       | 0.29(2.4, 0.93)          | 0.52(0.79, 0.30) |
| 24    | 0.05(1.5)       | 0.26(4.20)       | 0.09(1.1, 0.80)          | 0.41(3.56, 0.58) | 0.37(2.3)       | 0.41(0.11)       | 0.47(2.7, 0.27)          | 0.57(0.21, 0.39) |
| 25    | 0.10(1.7)       | 0.36(2.60)       | 0.17(1.8, 0.70)          | 0.50(1.94, 0.39) | 0.12(1.8)       | 0.29(1.42)       | 0.26(2.2, 1.17)          | 0.44(0.69, 0.52) |
| Mean  | 0.18(2.0)       | 0.38(1.17)       | 0.23(1.8, 0.33)          | 0.52(1.24, 0.37) | 0.16(2.0)       | 0.37(1.36)       | 0.25(2.0, 0.63)          | 0.52(1.03, 0.40) |

<sup>a</sup> In parentheses is the number of QTL identified by QP based on the SE model; <sup>b</sup> In parentheses is the gain in prediction accuracy with GWP over QP based on the SE model; <sup>c</sup> The first value in parentheses is the number of QTL identified by QP based on the ME model; and the second one the gain

with ME over SE for QP; <sup>d</sup> The first value in parentheses is the gain in accuracy with GWP over QP based on the ME model; and the second one is the gain in accuracy with ME over SE using GWP. Bold in parentheses indicates the number is not significant at  $\alpha = 0.05$ .



**Table S18 Accuracy of WP prediction for environment E4 with QP and GWP in CV2**

| PopId | LL              |                  |                          |                  | LW              |                  |                          |                  |
|-------|-----------------|------------------|--------------------------|------------------|-----------------|------------------|--------------------------|------------------|
|       | SE              |                  | ME                       |                  | SE              |                  | ME                       |                  |
|       | QP <sup>a</sup> | GWP <sup>b</sup> | QP <sup>c</sup>          | GWP <sup>d</sup> | QP <sup>a</sup> | GWP <sup>b</sup> | QP <sup>c</sup>          | GWP <sup>d</sup> |
| 1     | 0.31(2.4)       | 0.46(0.48)       | 0.47(3.4, 0.52)          | 0.61(0.30, 0.33) | 0.25(2.5)       | 0.51(1.04)       | 0.25(1.6, <b>0.00</b> )  | 0.62(1.48, 0.22) |
| 2     | 0.05(2.0)       | 0.30(5.00)       | 0.08(0.8, <b>0.60</b> )  | 0.52(5.50, 0.73) | 0.20(2.5)       | 0.46(1.30)       | 0.25(1.8, 0.25)          | 0.62(1.48, 0.35) |
| 3     | 0.08(1.3)       | 0.27(2.38)       | 0.06(0.8, <b>-0.25</b> ) | 0.36(5.00, 0.33) | 0.29(2.6)       | 0.41(0.41)       | 0.40(2.6, 0.38)          | 0.61(0.52, 0.49) |
| 4     | 0.31(3.1)       | 0.53(0.71)       | 0.43(3.2, 0.39)          | 0.65(0.51, 0.23) | 0.33(2.8)       | 0.52(0.58)       | 0.25(1.6, -0.24)         | 0.63(1.52, 0.21) |
| 5     | 0.07(1.8)       | 0.37(4.29)       | 0.18(1.9, 1.57)          | 0.55(2.06, 0.49) | 0.07(2.2)       | 0.44(5.29)       | 0.13(0.9, 0.86)          | 0.62(3.77, 0.41) |
| 6     | 0.22(2.7)       | 0.47(1.14)       | 0.31(2.3, 0.41)          | 0.59(0.90, 0.26) | 0.08(1.4)       | 0.31(2.87)       | 0.10(1.0, <b>0.25</b> )  | 0.46(3.60, 0.48) |
| 7     | 0.33(2.6)       | 0.60(0.82)       | 0.38(1.9, 0.15)          | 0.73(0.92, 0.22) | 0.38(3.2)       | 0.61(0.61)       | 0.35(1.9, <b>-0.08</b> ) | 0.72(1.06, 0.18) |
| 8     | 0.18(2.2)       | 0.37(1.06)       | 0.26(1.7, 0.44)          | 0.59(1.27, 0.59) | 0.28(2.3)       | 0.40(0.43)       | 0.37(2.2, 0.32)          | 0.57(0.54, 0.42) |
| 9     | 0.10(1.9)       | 0.33(2.30)       | 0.18(1.7, 0.80)          | 0.48(1.67, 0.45) | 0.37(2.6)       | 0.48(0.30)       | 0.39(1.7, <b>0.05</b> )  | 0.51(0.31, 0.06) |
| 10    | 0.13(2.2)       | 0.42(2.23)       | 0.25(2.1, 0.92)          | 0.57(1.28, 0.36) | 0.26(3.3)       | 0.62(1.38)       | 0.32(2.4, 0.23)          | 0.72(1.25, 0.16) |
| 11    | 0.16(2.1)       | 0.29(0.81)       | 0.37(2.6, 1.31)          | 0.49(0.32, 0.69) | 0.18(2.6)       | 0.46(1.56)       | 0.24(1.7, 0.33)          | 0.60(1.50, 0.30) |
| 12    | 0.15(2.7)       | 0.50(2.33)       | 0.32(2.9, 1.13)          | 0.64(1.00, 0.28) | 0.38(3.4)       | 0.57(0.50)       | 0.45(2.8, 0.18)          | 0.66(0.47, 0.16) |
| 13    | 0.10(1.3)       | 0.24(1.40)       | 0.30(1.6, 2.00)          | 0.54(0.80, 1.25) | 0.16(2.1)       | 0.42(1.62)       | 0.28(1.7, 0.75)          | 0.60(1.14, 0.43) |
| 14    | 0.06(1.9)       | 0.35(4.83)       | 0.19(1.6, 2.17)          | 0.53(1.79, 0.51) | 0.24(2.3)       | 0.44(0.83)       | 0.23(1.4, <b>-0.04</b> ) | 0.63(1.74, 0.43) |
| 15    | 0.21(1.9)       | 0.37(0.76)       | 0.23(1.4, <b>0.10</b> )  | 0.57(1.48, 0.54) | 0.29(3.0)       | 0.54(0.86)       | 0.35(2.5, 0.21)          | 0.68(0.94, 0.26) |
| 16    | 0.08(1.3)       | 0.21(1.62)       | 0.19(1.2, 1.38)          | 0.42(1.21, 1.00) | 0.30(3.0)       | 0.54(0.80)       | 0.43(2.7, 0.43)          | 0.66(0.53, 0.22) |
| 17    | 0.12(1.6)       | 0.35(1.92)       | 0.13(0.8, <b>0.08</b> )  | 0.48(2.69, 0.37) | 0.31(3.3)       | 0.56(0.81)       | 0.42(3.5, 0.35)          | 0.70(0.67, 0.25) |
| 18    | 0.04(1.3)       | 0.26(5.50)       | 0.06(0.6, <b>0.50</b> )  | 0.37(5.17, 0.42) | 0.22(2.0)       | 0.33(0.50)       | 0.28(1.6, 0.27)          | 0.45(0.61, 0.36) |
| 19    | 0.06(1.5)       | 0.28(3.67)       | 0.13(1.5, 1.17)          | 0.45(2.46, 0.61) | 0.42(3.4)       | 0.50(0.19)       | 0.42(2.1, <b>0.00</b> )  | 0.66(0.57, 0.32) |
| 20    | 0.11(2.2)       | 0.47(3.27)       | 0.14(1.5, 0.27)          | 0.59(3.21, 0.26) | 0.49(2.6)       | 0.53(0.08)       | 0.45(2.2, -0.08)         | 0.67(0.49, 0.26) |
| 21    | 0.38(3.4)       | 0.61(0.61)       | 0.49(3.3, 0.29)          | 0.69(0.41, 0.13) | 0.10(1.8)       | 0.36(2.60)       | 0.18(1.7, 0.80)          | 0.49(1.72, 0.36) |
| 22    | 0.30(2.3)       | 0.46(0.53)       | 0.28(1.4, <b>-0.07</b> ) | 0.55(0.96, 0.20) | 0.25(2.8)       | 0.54(1.16)       | 0.26(1.6, <b>0.04</b> )  | 0.67(1.58, 0.24) |
| 23    | 0.26(2.0)       | 0.39(0.50)       | 0.29(2.0, 0.12)          | 0.50(0.72, 0.28) | 0.29(3.0)       | 0.48(0.66)       | 0.32(2.4, <b>0.10</b> )  | 0.60(0.87, 0.25) |
| 24    | 0.19(1.9)       | 0.23(0.21)       | 0.13(1.1, -0.32)         | 0.41(2.15, 0.78) | 0.31(3.1)       | 0.46(0.48)       | 0.44(2.7, 0.42)          | 0.62(0.41, 0.35) |
| 25    | 0.02(1.5)       | 0.24(11.00)      | 0.12(1.8, 5.00)          | 0.45(2.75, 0.88) | 0.27(2.5)       | 0.49(0.81)       | 0.38(2.2, 0.41)          | 0.54(0.42, 0.10) |
| Mean  | 0.16(2.0)       | 0.38(1.38)       | 0.24(1.8, 0.49)          | 0.53(1.23, 0.39) | 0.27(2.7)       | 0.48(0.78)       | 0.32(2.0, 0.18)          | 0.61(0.93, 0.28) |

<sup>a</sup> In parentheses is the number of QTL identified by QP based on the SE model; <sup>b</sup> In parentheses is the gain in prediction accuracy with GWP over QP based on the SE model; <sup>c</sup> The first value in parentheses is the number of QTL identified by QP based on the ME model; and the second one the gain

with ME over SE for QP; <sup>d</sup> The first value in parentheses is the gain in accuracy with GWP over QP based on the ME model; and the second one is the gain in accuracy with ME over SE using GWP. Bold in parentheses indicates the number is not significant at  $\alpha = 0.05$ .

**Table S19 Accuracy of AP prediction for environment E1 with QP and GWP in CV2**

| PopId | LL              |                     |                          |                           | LW              |                     |                           |                           |
|-------|-----------------|---------------------|--------------------------|---------------------------|-----------------|---------------------|---------------------------|---------------------------|
|       | SE              |                     | ME                       |                           | SE              |                     | ME                        |                           |
|       | QP <sup>a</sup> | GWP <sup>b</sup>    | QP <sup>c</sup>          | GWP <sup>d</sup>          | QP <sup>a</sup> | GWP <sup>b</sup>    | QP <sup>c</sup>           | GWP <sup>d</sup>          |
| 1     | 0.21(8.0)       | 0.31(0.48)          | 0.27(9.5, 0.29)          | 0.35(0.30, 0.13)          | 0.20(8.5)       | 0.27(0.35)          | 0.22(11.0, 0.10)          | 0.30(0.36, 0.11)          |
| 2     | 0.14(8.0)       | 0.17(0.21)          | 0.20(9.5, 0.43)          | 0.22(0.10, 0.29)          | 0.37(8.5)       | 0.41(0.11)          | 0.37(11.0, <b>0.00</b> )  | 0.44(0.19, 0.07)          |
| 3     | 0.20(8.0)       | 0.25(0.25)          | 0.22(9.5, <b>0.10</b> )  | 0.28(0.27, 0.12)          | 0.39(8.5)       | 0.55(0.41)          | 0.46(11.0, 0.18)          | 0.59(0.28, 0.07)          |
| 4     | 0.43(8.0)       | 0.45(0.05)          | 0.40(9.5, -0.07)         | 0.48(0.20, 0.07)          | 0.32(8.5)       | 0.33(0.03)          | 0.29(11.0, -0.09)         | 0.33(0.14, <b>0.00</b> )  |
| 5     | 0.26(8.0)       | 0.26( <b>0.00</b> ) | 0.21(9.5, -0.19)         | 0.28(0.33, 0.08)          | 0.14(8.5)       | 0.24(0.71)          | 0.15(11.0, <b>0.07</b> )  | 0.28(0.87, 0.17)          |
| 6     | 0.39(8.0)       | 0.47(0.21)          | 0.39(9.5, <b>0.00</b> )  | 0.51(0.31, 0.09)          | 0.33(8.5)       | 0.38(0.15)          | 0.39(11.0, 0.18)          | 0.41(0.05, 0.08)          |
| 7     | 0.27(8.0)       | 0.29(0.07)          | 0.32(9.5, 0.19)          | 0.36(0.13, 0.24)          | 0.33(8.5)       | 0.37(0.12)          | 0.39(11.0, 0.18)          | 0.44(0.13, 0.19)          |
| 8     | 0.36(8.0)       | 0.44(0.22)          | 0.40(9.5, 0.11)          | 0.49(0.23, 0.11)          | 0.28(8.5)       | 0.37(0.32)          | 0.33(11.0, 0.18)          | 0.40(0.21, 0.08)          |
| 9     | 0.33(8.0)       | 0.35(0.06)          | 0.36(9.5, 0.09)          | 0.39(0.08, 0.11)          | 0.16(8.5)       | 0.16( <b>0.00</b> ) | 0.18(11.0, 0.12)          | 0.18( <b>0.00</b> , 0.13) |
| 10    | 0.32(8.0)       | 0.39(0.22)          | 0.39(9.5, 0.22)          | 0.44(0.13, 0.13)          | 0.39(8.5)       | 0.44(0.13)          | 0.44(11.0, 0.13)          | 0.50(0.14, 0.14)          |
| 11    | 0.09(8.0)       | 0.14(0.56)          | 0.11(9.5, 0.22)          | 0.20(0.82, 0.43)          | 0.16(8.5)       | 0.21(0.31)          | 0.23(11.0, 0.44)          | 0.24(0.04, 0.14)          |
| 12    | 0.35(8.0)       | 0.40(0.14)          | 0.40(9.5, 0.14)          | 0.46(0.15, 0.15)          | 0.50(8.5)       | 0.57(0.14)          | 0.53(11.0, 0.06)          | 0.60(0.13, 0.05)          |
| 13    | 0.25(8.0)       | 0.28(0.12)          | 0.38(9.5, 0.52)          | 0.38( <b>0.00</b> , 0.36) | 0.41(8.5)       | 0.40(-0.02)         | 0.47(11.0, 0.15)          | 0.44(-0.06, 0.1)          |
| 14    | 0.37(8.0)       | 0.40(0.08)          | 0.39(9.5, 0.05)          | 0.44(0.13, 0.10)          | 0.37(8.5)       | 0.36(-0.03)         | 0.40(11.0, 0.08)          | 0.42(0.05, 0.17)          |
| 15    | 0.23(8.0)       | 0.25(0.09)          | 0.19(9.5, -0.17)         | 0.27(0.42, 0.08)          | 0.22(8.5)       | 0.33(0.50)          | 0.24(11.0, 0.09)          | 0.34(0.42, 0.03)          |
| 16    | 0.21(8.0)       | 0.30(0.43)          | 0.23(9.5, 0.10)          | 0.34(0.48, 0.13)          | 0.42(8.5)       | 0.51(0.21)          | 0.50(11.0, 0.19)          | 0.53(0.06, 0.04)          |
| 17    | 0.29(8.0)       | 0.29( <b>0.00</b> ) | 0.31(9.5, <b>0.07</b> )  | 0.33(0.06, 0.14)          | 0.37(8.5)       | 0.46(0.24)          | 0.46(11.0, 0.24)          | 0.51(0.11, 0.11)          |
| 18    | 0.14(8.0)       | 0.15(0.07)          | 0.14(9.5, <b>0.00</b> )  | 0.17(0.21, 0.13)          | 0.21(8.5)       | 0.30(0.43)          | 0.29(11.0, 0.38)          | 0.33(0.14, 0.10)          |
| 19    | 0.29(8.0)       | 0.32(0.10)          | 0.34(9.5, 0.17)          | 0.37(0.09, 0.16)          | 0.22(8.5)       | 0.26(0.18)          | 0.26(11.0, 0.18)          | 0.29(0.12, 0.12)          |
| 20    | 0.29(8.0)       | 0.42(0.45)          | 0.32(9.5, 0.10)          | 0.45(0.41, 0.07)          | 0.38(8.5)       | 0.44(0.16)          | 0.37(11.0, <b>-0.03</b> ) | 0.47(0.27, 0.07)          |
| 21    | 0.30(8.0)       | 0.33(0.10)          | 0.35(9.5, 0.17)          | 0.39(0.11, 0.18)          | 0.28(8.5)       | 0.32(0.14)          | 0.31(11.0, 0.11)          | 0.35(0.13, 0.09)          |
| 22    | 0.30(8.0)       | 0.34(0.13)          | 0.29(9.5, <b>-0.03</b> ) | 0.36(0.24, 0.06)          | 0.24(8.5)       | 0.31(0.29)          | 0.26(11.0, 0.08)          | 0.34(0.31, 0.10)          |
| 23    | 0.15(8.0)       | 0.22(0.47)          | 0.18(9.5, 0.20)          | 0.25(0.39, 0.14)          | 0.15(8.5)       | 0.17(0.13)          | 0.24(11.0, 0.60)          | 0.24( <b>0.00</b> , 0.41) |
| 24    | 0.23(8.0)       | 0.32(0.39)          | 0.23(9.5, <b>0.00</b> )  | 0.32(0.39, <b>0.00</b> )  | 0.45(8.5)       | 0.47(0.04)          | 0.47(11.0, 0.04)          | 0.50(0.06, 0.06)          |
| 25    | 0.39(8.0)       | 0.43(0.10)          | 0.35(9.5, -0.10)         | 0.46(0.31, 0.07)          | 0.38(8.5)       | 0.48(0.26)          | 0.40(11.0, 0.05)          | 0.51(0.28, 0.06)          |
| Mean  | 0.27(8.0)       | 0.32(0.19)          | 0.29(9.5, 0.09)          | 0.36(0.24, 0.12)          | 0.31(8.5)       | 0.36(0.16)          | 0.35(11.1, 0.13)          | 0.40(0.14, 0.10)          |

<sup>a</sup> In parentheses is the number of QTL identified by QP based on the SE model; <sup>b</sup> In parentheses is the gain in prediction accuracy with GWP over QP based on the SE model; <sup>c</sup> The first value in parentheses is the number of QTL identified by QP based on the ME model; and the second one the gain

with ME over SE for QP; <sup>d</sup> The first value in parentheses is the gain in accuracy with GWP over QP based on the ME model; the second one is the gain in accuracy with ME over SE using GWP; and the third one is the gain in accuracy with GWP over PP. Bold in parentheses indicates the number is not significant at  $\alpha = 0.05$ .

**Table S20 Accuracy of AP prediction for environment E2 with QP and GWP in CV2**

| PopId | LL              |                     |                          |                           | LW              |                     |                           |                   |
|-------|-----------------|---------------------|--------------------------|---------------------------|-----------------|---------------------|---------------------------|-------------------|
|       | SE              |                     | ME                       |                           | SE              |                     | ME                        |                   |
|       | QP <sup>a</sup> | GWP <sup>b</sup>    | QP <sup>c</sup>          | GWP <sup>d</sup>          | QP <sup>a</sup> | GWP <sup>b</sup>    | QP <sup>c</sup>           | GWP <sup>d</sup>  |
| 1     | 0.33(9.8)       | 0.45(0.36)          | 0.30(9.5, -0.09)         | 0.47(0.57, 0.04)          | 0.22(10.6)      | 0.25(0.14)          | 0.28(11.0, 0.27)          | 0.30(0.07, 0.20)  |
| 2     | 0.27(9.8)       | 0.30(0.11)          | 0.28(9.5, 0.04)          | 0.36(0.29, 0.20)          | 0.35(10.6)      | 0.45(0.29)          | 0.39(11.0, 0.11)          | 0.50(0.28, 0.11)  |
| 3     | 0.28(9.8)       | 0.30(0.07)          | 0.26(9.5, -0.07)         | 0.32(0.23, 0.07)          | 0.47(10.6)      | 0.56(0.19)          | 0.52(11.0, 0.11)          | 0.60(0.15, 0.07)  |
| 4     | 0.33(9.8)       | 0.42(0.27)          | 0.34(9.5, <b>0.03</b> )  | 0.46(0.35, 0.10)          | 0.35(10.6)      | 0.38(0.09)          | 0.38(11.0, 0.09)          | 0.42(0.11, 0.11)  |
| 5     | 0.28(9.8)       | 0.33(0.18)          | 0.28(9.5, <b>0.00</b> )  | 0.37(0.32, 0.12)          | 0.38(10.6)      | 0.47(0.24)          | 0.41(11.0, 0.08)          | 0.52(0.27, 0.11)  |
| 6     | 0.39(9.8)       | 0.46(0.18)          | 0.43(9.5, 0.10)          | 0.49(0.14, 0.07)          | 0.31(10.6)      | 0.28(-0.10)         | 0.31(11.0, <b>0.00</b> )  | 0.30(-0.03, 0.07) |
| 7     | 0.23(9.8)       | 0.23( <b>0.00</b> ) | 0.25(9.5, 0.09)          | 0.28(0.12, 0.22)          | 0.47(10.6)      | 0.60(0.28)          | 0.48(11.0, 0.02)          | 0.62(0.29, 0.03)  |
| 8     | 0.30(9.8)       | 0.27(-0.10)         | 0.34(9.5, 0.13)          | 0.32(-0.06, 0.19)         | 0.30(10.6)      | 0.36(0.20)          | 0.34(11.0, 0.13)          | 0.38(0.12, 0.06)  |
| 9     | 0.21(9.8)       | 0.21( <b>0.00</b> ) | 0.27(9.5, 0.29)          | 0.24(-0.11, 0.14)         | 0.32(10.6)      | 0.36(0.13)          | 0.38(11.0, 0.19)          | 0.39(0.03, 0.08)  |
| 10    | 0.41(9.8)       | 0.49(0.20)          | 0.40(9.5, <b>-0.02</b> ) | 0.52(0.30, 0.06)          | 0.35(10.6)      | 0.42(0.20)          | 0.41(11.0, 0.17)          | 0.48(0.17, 0.14)  |
| 11    | 0.27(9.8)       | 0.34(0.26)          | 0.28(9.5, <b>0.04</b> )  | 0.39(0.39, 0.15)          | 0.32(10.6)      | 0.37(0.16)          | 0.35(11.0, 0.09)          | 0.40(0.14, 0.08)  |
| 12    | 0.38(9.8)       | 0.42(0.11)          | 0.44(9.5, 0.16)          | 0.46(0.05, 0.10)          | 0.51(10.6)      | 0.60(0.18)          | 0.54(11.0, 0.06)          | 0.63(0.17, 0.05)  |
| 13    | 0.32(9.8)       | 0.36(0.13)          | 0.29(9.5, -0.09)         | 0.40(0.38, 0.11)          | 0.38(10.6)      | 0.41(0.08)          | 0.42(11.0, 0.11)          | 0.44(0.05, 0.07)  |
| 14    | 0.27(9.8)       | 0.27( <b>0.00</b> ) | 0.33(9.5, 0.22)          | 0.33( <b>0.00</b> , 0.22) | 0.35(10.6)      | 0.38(0.09)          | 0.36(11.0, <b>0.03</b> )  | 0.41(0.14, 0.08)  |
| 15    | 0.23(9.8)       | 0.33(0.43)          | 0.25(9.5, <b>0.09</b> )  | 0.37(0.48, 0.12)          | 0.47(10.6)      | 0.54(0.15)          | 0.46(11.0, <b>-0.02</b> ) | 0.55(0.20, 0.02)  |
| 16    | 0.30(9.8)       | 0.41(0.37)          | 0.31(9.5, <b>0.03</b> )  | 0.45(0.45, 0.10)          | 0.48(10.6)      | 0.54(0.13)          | 0.51(11.0, 0.06)          | 0.56(0.10, 0.04)  |
| 17    | 0.05(9.8)       | 0.10(1.00)          | 0.08(9.5, 0.60)          | 0.14(0.75, 0.40)          | 0.58(10.6)      | 0.61(0.05)          | 0.58(11.0, 0.00)          | 0.62(0.07, 0.02)  |
| 18    | 0.15(9.8)       | 0.20(0.33)          | 0.15(9.5, <b>0.00</b> )  | 0.22(0.47, 0.10)          | 0.24(10.6)      | 0.26(0.08)          | 0.22(11.0, -0.08)         | 0.27(0.23, 0.04)  |
| 19    | 0.35(9.8)       | 0.40(0.14)          | 0.39(9.5, 0.11)          | 0.43(0.10, 0.07)          | 0.42(10.6)      | 0.42( <b>0.00</b> ) | 0.41(11.0, <b>-0.02</b> ) | 0.44(0.07, 0.05)  |
| 20    | 0.26(9.8)       | 0.42(0.62)          | 0.26(9.5, <b>0.00</b> )  | 0.44(0.69, 0.05)          | 0.39(10.6)      | 0.44(0.13)          | 0.38(11.0, <b>-0.03</b> ) | 0.46(0.21, 0.05)  |
| 21    | 0.39(9.8)       | 0.48(0.23)          | 0.42(9.5, 0.08)          | 0.51(0.21, 0.06)          | 0.37(10.6)      | 0.44(0.19)          | 0.38(11.0, <b>0.03</b> )  | 0.45(0.18, 0.02)  |
| 22    | 0.44(9.8)       | 0.44( <b>0.00</b> ) | 0.45(9.5, <b>0.02</b> )  | 0.47(0.04, 0.07)          | 0.39(10.6)      | 0.43(0.10)          | 0.36(11.0, -0.08)         | 0.47(0.31, 0.09)  |
| 23    | 0.30(9.8)       | 0.36(0.20)          | 0.29(9.5, <b>-0.03</b> ) | 0.39(0.34, 0.08)          | 0.37(10.6)      | 0.39(0.05)          | 0.39(11.0, 0.05)          | 0.42(0.08, 0.08)  |
| 24    | 0.19(9.8)       | 0.21(0.11)          | 0.19(9.5, <b>0.00</b> )  | 0.25(0.32, 0.19)          | 0.44(10.6)      | 0.49(0.11)          | 0.49(11.0, 0.11)          | 0.51(0.04, 0.04)  |
| 25    | 0.15(9.8)       | 0.27(0.80)          | 0.16(9.5, <b>0.07</b> )  | 0.31(0.94, 0.15)          | 0.30(10.6)      | 0.37(0.23)          | 0.35(11.0, 0.17)          | 0.42(0.20, 0.14)  |
| Mean  | 0.28(9.8)       | 0.34(0.21)          | 0.30(9.5, 0.05)          | 0.37(0.23, 0.10)          | 0.38(10.6)      | 0.43(0.13)          | 0.40(11.1, 0.06)          | 0.46(0.15, 0.07)  |

<sup>a</sup> In parentheses is the number of QTL identified by QP based on the SE model; <sup>b</sup> In parentheses is the gain in prediction accuracy with GWP over QP based on the SE model; <sup>c</sup> The first value in parentheses is the number of QTL identified by QP based on the ME model; and the second one the

gain with ME over SE for QP; <sup>d</sup> The first value in parentheses is the gain in accuracy with GWP over QP based on the ME model; the second one is the gain in accuracy with ME over SE using GWP; and the third one is the gain in accuracy with GWP over PP. Bold in parentheses indicates the number is not significant at  $\alpha = 0.05$ .

**Table S21 Accuracy of AP prediction for environment E3 with QP and GWP in CV2**

| PopId | LL              |                     |                          |                   | LW              |                  |                           |                           |
|-------|-----------------|---------------------|--------------------------|-------------------|-----------------|------------------|---------------------------|---------------------------|
|       | SE              |                     | ME                       |                   | SE              |                  | ME                        |                           |
|       | QP <sup>a</sup> | GWP <sup>b</sup>    | QP <sup>c</sup>          | GWP <sup>d</sup>  | QP <sup>a</sup> | GWP <sup>b</sup> | QP <sup>c</sup>           | GWP <sup>d</sup>          |
| 1     | 0.29(7.8)       | 0.41(0.41)          | 0.34(9.5, 0.17)          | 0.45(0.32, 0.10)  | 0.20(7.4)       | 0.23(0.15)       | 0.26(11.0, 0.30)          | 0.27( <b>0.01</b> , 0.17) |
| 2     | 0.27(7.8)       | 0.29(0.07)          | 0.27(9.5, <b>0.00</b> )  | 0.35(0.30, 0.21)  | 0.41(7.4)       | 0.47(0.15)       | 0.44(11.0, 0.07)          | 0.52(0.18, 0.11)          |
| 3     | 0.11(7.8)       | 0.21(0.91)          | 0.14(9.5, 0.27)          | 0.23(0.64, 0.10)  | 0.34(7.4)       | 0.36(0.06)       | 0.32(11.0, -0.06)         | 0.38(0.19, 0.06)          |
| 4     | 0.29(7.8)       | 0.44(0.52)          | 0.31(9.5, <b>0.07</b> )  | 0.46(0.48, 0.05)  | 0.18(7.4)       | 0.22(0.22)       | 0.18(11.0, <b>0.00</b> )  | 0.26(0.44, 0.18)          |
| 5     | 0.22(7.8)       | 0.22( <b>0.00</b> ) | 0.24(9.5, 0.09)          | 0.27(0.13, 0.23)  | 0.38(7.4)       | 0.44(0.16)       | 0.37(11.0, <b>-0.03</b> ) | 0.46(0.24, 0.05)          |
| 6     | 0.39(7.8)       | 0.48(0.23)          | 0.37(9.5, -0.05)         | 0.50(0.35, 0.04)  | 0.19(7.4)       | 0.26(0.37)       | 0.20(11.0, <b>0.05</b> )  | 0.27(0.35, 0.04)          |
| 7     | 0.25(7.8)       | 0.25( <b>0.00</b> ) | 0.19(9.5, -0.24)         | 0.28(0.47, 0.12)  | 0.22(7.4)       | 0.32(0.45)       | 0.29(11.0, 0.32)          | 0.37(0.28, 0.16)          |
| 8     | 0.22(7.8)       | 0.28(0.27)          | 0.24(9.5, 0.09)          | 0.32(0.33, 0.14)  | 0.23(7.4)       | 0.29(0.26)       | 0.26(11.0, 0.13)          | 0.31(0.19, 0.07)          |
| 9     | 0.30(7.8)       | 0.36(0.20)          | 0.35(9.5, 0.17)          | 0.39(0.11, 0.08)  | 0.32(7.4)       | 0.33(0.03)       | 0.34(11.0, 0.06)          | 0.34( <b>0.00</b> , 0.03) |
| 10    | 0.33(7.8)       | 0.48(0.45)          | 0.38(9.5, 0.15)          | 0.51(0.34, 0.06)  | 0.42(7.4)       | 0.55(0.31)       | 0.44(11.0, 0.05)          | 0.57(0.30, 0.04)          |
| 11    | 0.18(7.8)       | 0.27(0.50)          | 0.17(9.5, <b>-0.06</b> ) | 0.31(0.82, 0.15)  | 0.19(7.4)       | 0.27(0.42)       | 0.23(11.0, 0.21)          | 0.31(0.35, 0.15)          |
| 12    | 0.25(7.8)       | 0.32(0.28)          | 0.30(9.5, 0.20)          | 0.35(0.17, 0.09)  | 0.28(7.4)       | 0.32(0.14)       | 0.30(11.0, 0.07)          | 0.33(0.10, 0.03)          |
| 13    | 0.33(7.8)       | 0.38(0.15)          | 0.42(9.5, 0.27)          | 0.46(0.10, 0.21)  | 0.39(7.4)       | 0.40(0.03)       | 0.43(11.0, 0.10)          | 0.42(-0.02, 0.05)         |
| 14    | 0.19(7.8)       | 0.26(0.37)          | 0.19(9.5, <b>0.00</b> )  | 0.30(0.58, 0.15)  | 0.22(7.4)       | 0.26(0.18)       | 0.28(11.0, 0.27)          | 0.32(0.14, 0.23)          |
| 15    | 0.11(7.8)       | 0.25(1.27)          | 0.14(9.5, 0.27)          | 0.31(1.21, 0.24)  | 0.39(7.4)       | 0.49(0.26)       | 0.45(11.0, 0.15)          | 0.52(0.16, 0.06)          |
| 16    | 0.13(7.8)       | 0.20(0.54)          | 0.14(9.5, <b>0.08</b> )  | 0.24(0.71, 0.20)  | 0.37(7.4)       | 0.46(0.24)       | 0.44(11.0, 0.19)          | 0.52(0.18, 0.13)          |
| 17    | 0.25(7.8)       | 0.29(0.16)          | 0.24(9.5, <b>-0.04</b> ) | 0.31(0.29, 0.07)  | 0.21(7.4)       | 0.31(0.48)       | 0.31(11.0, 0.48)          | 0.37(0.19, 0.19)          |
| 18    | 0.08(7.8)       | 0.11(0.38)          | 0.18(9.5, 1.25)          | 0.15(-0.17, 0.36) | 0.34(7.4)       | 0.37(0.09)       | 0.36(11.0, 0.06)          | 0.39(0.08, 0.05)          |
| 19    | 0.33(7.8)       | 0.39(0.18)          | 0.41(9.5, 0.24)          | 0.42(0.02, 0.08)  | 0.33(7.4)       | 0.30(-0.09)      | 0.33(11.0, <b>0.00</b> )  | 0.34(0.03, 0.13)          |
| 20    | 0.21(7.8)       | 0.35(0.67)          | 0.24(9.5, 0.14)          | 0.39(0.63, 0.11)  | 0.41(7.4)       | 0.46(0.12)       | 0.43(11.0, 0.05)          | 0.50(0.16, 0.09)          |
| 21    | 0.30(7.8)       | 0.46(0.53)          | 0.42(9.5, 0.40)          | 0.52(0.24, 0.13)  | 0.37(7.4)       | 0.42(0.14)       | 0.44(11.0, 0.19)          | 0.45(0.02, 0.07)          |
| 22    | 0.23(7.8)       | 0.21(-0.09)         | 0.31(9.5, 0.35)          | 0.26(-0.16, 0.24) | 0.19(7.4)       | 0.27(0.42)       | 0.25(11.0, 0.32)          | 0.31(0.24, 0.15)          |
| 23    | 0.20(7.8)       | 0.23(0.15)          | 0.19(9.5, <b>-0.05</b> ) | 0.27(0.42, 0.17)  | 0.21(7.4)       | 0.29(0.38)       | 0.26(11.0, 0.24)          | 0.33(0.27, 0.14)          |
| 24    | 0.12(7.8)       | 0.20(0.67)          | 0.16(9.5, 0.33)          | 0.23(0.44, 0.15)  | 0.40(7.4)       | 0.39(-0.03)      | 0.44(11.0, 0.10)          | 0.43(-0.02, 0.10)         |
| 25    | 0.23(7.8)       | 0.38(0.65)          | 0.20(9.5, -0.13)         | 0.39(0.95, 0.03)  | 0.23(7.4)       | 0.26(0.13)       | 0.23(11.0, <b>0.00</b> )  | 0.28(0.22, 0.08)          |
| Mean  | 0.23(7.8)       | 0.31(0.35)          | 0.26(9.5, 0.13)          | 0.35(0.35, 0.12)  | 0.30(7.3)       | 0.35(0.17)       | 0.33(11.1, 0.12)          | 0.38(0.15, 0.09)          |

<sup>a</sup> In parentheses is the number of QTL identified by QP based on the SE model; <sup>b</sup> In parentheses is the gain in prediction accuracy with GWP over QP based on the SE model; <sup>c</sup> The first value in parentheses is the number of QTL identified by QP based on the ME model; and the second one the gain

with ME over SE for QP; <sup>d</sup> The first value in parentheses is the gain in accuracy with GWP over QP based on the ME model; the second one is the gain in accuracy with ME over SE using GWP; and the third one is the gain in accuracy with GWP over PP. Bold in parentheses indicates the number is not significant at  $\alpha = 0.05$ .



**Table S22 Accuracy of AP prediction for environment E4 with QP and GWP in CV2**

| PopId | LL              |                  |                          |                           | LW              |                  |                           |                   |
|-------|-----------------|------------------|--------------------------|---------------------------|-----------------|------------------|---------------------------|-------------------|
|       | SE              |                  | ME                       |                           | SE              |                  | ME                        |                   |
|       | QP <sup>a</sup> | GWP <sup>b</sup> | QP <sup>c</sup>          | GWP <sup>d</sup>          | QP <sup>a</sup> | GWP <sup>b</sup> | QP <sup>c</sup>           | GWP <sup>d</sup>  |
| 1     | 0.22(7.4)       | 0.30(0.36)       | 0.24(9.5, <b>0.09</b> )  | 0.36(0.50, 0.20)          | 0.30(11.0)      | 0.34(0.13)       | 0.34(11.0, 0.13)          | 0.37(0.09, 0.09)  |
| 2     | 0.18(7.4)       | 0.25(0.39)       | 0.21(9.5, 0.17)          | 0.28(0.33, 0.12)          | 0.40(11.0)      | 0.44(0.10)       | 0.41(11.0, 0.02)          | 0.47(0.15, 0.07)  |
| 3     | 0.23(7.4)       | 0.26(0.13)       | 0.23(9.5, <b>0.00</b> )  | 0.30(0.30, 0.15)          | 0.37(11.0)      | 0.40(0.08)       | 0.37(11.0, <b>0.00</b> )  | 0.44(0.19, 0.10)  |
| 4     | 0.33(7.4)       | 0.45(0.36)       | 0.37(9.5, 0.12)          | 0.50(0.35, 0.11)          | 0.29(11.0)      | 0.31(0.07)       | 0.30(11.0, <b>0.03</b> )  | 0.34(0.13, 0.10)  |
| 5     | 0.23(7.4)       | 0.39(0.70)       | 0.26(9.5, 0.13)          | 0.42(0.62, 0.08)          | 0.28(11.0)      | 0.35(0.25)       | 0.32(11.0, 0.14)          | 0.40(0.25, 0.14)  |
| 6     | 0.38(7.4)       | 0.46(0.21)       | 0.42(9.5, 0.11)          | 0.52(0.24, 0.13)          | 0.31(11.0)      | 0.36(0.16)       | 0.31(11.0, <b>0.00</b> )  | 0.37(0.19, 0.03)  |
| 7     | 0.22(7.4)       | 0.36(0.64)       | 0.24(9.5, <b>0.09</b> )  | 0.39(0.63, 0.08)          | 0.47(11.0)      | 0.53(0.13)       | 0.50(11.0, 0.06)          | 0.57(0.14, 0.08)  |
| 8     | 0.24(7.4)       | 0.35(0.46)       | 0.32(9.5, 0.33)          | 0.40(0.25, 0.14)          | 0.32(11.0)      | 0.40(0.25)       | 0.36(11.0, 0.12)          | 0.44(0.22, 0.10)  |
| 9     | 0.27(7.4)       | 0.34(0.26)       | 0.30(9.5, 0.11)          | 0.37(0.23, 0.09)          | 0.38(11.0)      | 0.42(0.11)       | 0.41(11.0, 0.08)          | 0.46(0.12, 0.10)  |
| 10    | 0.35(7.4)       | 0.46(0.31)       | 0.34(9.5, <b>-0.03</b> ) | 0.51(0.50, 0.11)          | 0.46(11.0)      | 0.55(0.20)       | 0.46(11.0, <b>0.00</b> )  | 0.58(0.26, 0.05)  |
| 11    | 0.14(7.4)       | 0.27(0.93)       | 0.20(9.5, 0.43)          | 0.32(0.60, 0.19)          | 0.35(11.0)      | 0.37(0.06)       | 0.34(11.0, <b>-0.03</b> ) | 0.38(0.12, 0.03)  |
| 12    | 0.31(7.4)       | 0.34(0.10)       | 0.40(9.5, 0.29)          | 0.41(0.02, 0.21)          | 0.56(11.0)      | 0.58(0.04)       | 0.56(11.0, <b>0.00</b> )  | 0.60(0.07, 0.03)  |
| 13    | 0.18(7.4)       | 0.16(-0.11)      | 0.24(9.5, 0.33)          | 0.21(-0.13, 0.31)         | 0.29(11.0)      | 0.32(0.10)       | 0.37(11.0, 0.28)          | 0.38(0.03, 0.19)  |
| 14    | 0.25(7.4)       | 0.35(0.40)       | 0.28(9.5, 0.12)          | 0.38(0.36, 0.09)          | 0.33(11.0)      | 0.35(0.06)       | 0.36(11.0, 0.09)          | 0.38(0.06, 0.09)  |
| 15    | 0.17(7.4)       | 0.25(0.47)       | 0.21(9.5, 0.24)          | 0.30(0.43, 0.20)          | 0.56(11.0)      | 0.61(0.09)       | 0.57(11.0, 0.02)          | 0.63(0.11, 0.03)  |
| 16    | 0.18(7.4)       | 0.25(0.39)       | 0.20(9.5, 0.11)          | 0.30(0.50, 0.20)          | 0.49(11.0)      | 0.58(0.18)       | 0.53(11.0, 0.08)          | 0.60(0.13, 0.03)  |
| 17    | 0.14(7.4)       | 0.25(0.79)       | 0.15(9.5, <b>0.07</b> )  | 0.27(0.80, 0.08)          | 0.54(11.0)      | 0.55(0.02)       | 0.54(11.0, <b>0.00</b> )  | 0.57(0.06, 0.04)  |
| 18    | 0.12(7.4)       | 0.16(0.33)       | 0.19(9.5, 0.58)          | 0.18(-0.05, 0.13)         | 0.39(11.0)      | 0.41(0.05)       | 0.39(11.0, <b>0.00</b> )  | 0.42(0.08, 0.02)  |
| 19    | 0.22(7.4)       | 0.21(-0.05)      | 0.27(9.5, 0.23)          | 0.25(-0.07, 0.19)         | 0.40(11.0)      | 0.38(-0.05)      | 0.44(11.0, 0.10)          | 0.41(-0.07, 0.08) |
| 20    | 0.27(7.4)       | 0.42(0.56)       | 0.32(9.5, 0.19)          | 0.46(0.44, 0.10)          | 0.47(11.0)      | 0.52(0.11)       | 0.47(11.0, 0.00)          | 0.56(0.19, 0.08)  |
| 21    | 0.43(7.4)       | 0.52(0.21)       | 0.48(9.5, 0.12)          | 0.55(0.15, 0.06)          | 0.35(11.0)      | 0.41(0.17)       | 0.40(11.0, 0.14)          | 0.45(0.13, 0.10)  |
| 22    | 0.30(7.4)       | 0.29(-0.03)      | 0.31(9.5, <b>0.03</b> )  | 0.31( <b>0.00</b> , 0.07) | 0.34(11.0)      | 0.42(0.24)       | 0.33(11.0, -0.03)         | 0.45(0.36, 0.07)  |
| 23    | 0.06(7.4)       | 0.14(1.33)       | 0.05(9.5, -0.17)         | 0.17(2.40, 0.21)          | 0.31(11.0)      | 0.32(0.03)       | 0.30(11.0, -0.03)         | 0.35(0.17, 0.09)  |
| 24    | 0.18(7.4)       | 0.28(0.56)       | 0.21(9.5, 0.17)          | 0.29(0.38, 0.04)          | 0.46(11.0)      | 0.50(0.09)       | 0.49(11.0, 0.07)          | 0.52(0.06, 0.04)  |
| 25    | 0.15(7.4)       | 0.28(0.87)       | 0.17(9.5, 0.13)          | 0.33(0.94, 0.18)          | 0.36(11.0)      | 0.42(0.17)       | 0.34(11.0, -0.06)         | 0.44(0.29, 0.05)  |
| Mean  | 0.23(7.4)       | 0.31(0.35)       | 0.26(9.5, 0.15)          | 0.35(0.35, 0.12)          | 0.39(11.0)      | 0.43(0.10)       | 0.41(11.1, 0.04)          | 0.46(0.12, 0.07)  |

<sup>a</sup> In parentheses is the number of QTL identified by QP based on the SE model; <sup>b</sup> In parentheses is the gain in prediction accuracy with GWP over QP based on the SE model; <sup>c</sup> The first value in parentheses is the number of QTL identified by QP based on the ME model; and the second one the gain

with ME over SE for QP; <sup>d</sup> The first value in parentheses is the gain in accuracy with GWP over QP based on the ME model; the second one is the gain in accuracy with ME over SE using GWP; and the third one is the gain in accuracy with GWP over PP. Bold in parentheses indicates the number is not significant at  $\alpha = 0.05$ .

**Table S23 Accuracy of WP prediction for environment E1 with four ME GWP models in CV1**

| PopId | LL    |                    |                      |                      | LW    |                    |                     |                     |
|-------|-------|--------------------|----------------------|----------------------|-------|--------------------|---------------------|---------------------|
|       | SG-SR | SG-UR <sup>a</sup> | UG-SR <sup>b</sup>   | UG-UR <sup>c</sup>   | SG-SR | SG-UR <sup>a</sup> | UG-SR <sup>b</sup>  | UG-UR <sup>c</sup>  |
| 1     | 0.33  | 0.27(-0.17)        | 0.42(0.28)           | 0.42( <b>0.00</b> )  | 0.29  | 0.25(-0.16)        | 0.39(0.35)          | 0.39( <b>0.00</b> ) |
| 2     | 0.17  | 0.10(-0.42)        | 0.24(0.44)           | 0.24( <b>0.00</b> )  | 0.40  | 0.36(-0.10)        | 0.45(0.12)          | 0.45( <b>0.00</b> ) |
| 3     | 0.28  | 0.25(-0.08)        | 0.27(- <b>0.01</b> ) | 0.28(0.03)           | 0.55  | 0.52(-0.05)        | 0.59(0.06)          | 0.59( <b>0.00</b> ) |
| 4     | 0.48  | 0.44(-0.07)        | 0.50(0.05)           | 0.50( <b>0.00</b> )  | 0.49  | 0.47(-0.04)        | 0.53(0.08)          | 0.53( <b>0.00</b> ) |
| 5     | 0.32  | 0.24(-0.24)        | 0.39(0.22)           | 0.39( <b>0.00</b> )  | 0.20  | 0.12(-0.41)        | 0.30(0.49)          | 0.29(-0.02)         |
| 6     | 0.50  | 0.44(-0.11)        | 0.53(0.07)           | 0.53( <b>0.00</b> )  | 0.32  | 0.30(-0.07)        | 0.38(0.18)          | 0.38( <b>0.00</b> ) |
| 7     | 0.52  | 0.47(-0.09)        | 0.58(0.12)           | 0.57(- <b>0.01</b> ) | 0.48  | 0.44(-0.08)        | 0.52(0.09)          | 0.52( <b>0.00</b> ) |
| 8     | 0.31  | 0.24(-0.24)        | 0.37(0.19)           | 0.35(-0.05)          | 0.31  | 0.25(-0.19)        | 0.36(0.19)          | 0.38(0.04)          |
| 9     | 0.34  | 0.28(-0.19)        | 0.39(0.15)           | 0.38(-0.03)          | 0.17  | 0.12(-0.26)        | 0.35(1.11)          | 0.36(0.01)          |
| 10    | 0.47  | 0.42(-0.12)        | 0.50(0.05)           | 0.49(- <b>0.01</b> ) | 0.39  | 0.33(-0.15)        | 0.52(0.33)          | 0.52( <b>0.00</b> ) |
| 11    | 0.37  | 0.33(-0.12)        | 0.45(0.20)           | 0.45( <b>0.00</b> )  | 0.39  | 0.39(-0.02)        | 0.42(0.07)          | 0.42( <b>0.00</b> ) |
| 12    | 0.49  | 0.43(-0.11)        | 0.54(0.12)           | 0.54( <b>0.00</b> )  | 0.54  | 0.52(-0.05)        | 0.57(0.05)          | 0.57( <b>0.00</b> ) |
| 13    | 0.45  | 0.41(-0.09)        | 0.44(-0.03)          | 0.47(0.07)           | 0.50  | 0.46(-0.08)        | 0.52(0.05)          | 0.52( <b>0.00</b> ) |
| 14    | 0.38  | 0.31(-0.19)        | 0.43(0.11)           | 0.42( <b>0.00</b> )  | 0.47  | 0.43(-0.09)        | 0.50(0.07)          | 0.50( <b>0.00</b> ) |
| 15    | 0.28  | 0.20(-0.28)        | 0.32(0.12)           | 0.31(-0.03)          | 0.30  | 0.27(-0.11)        | 0.34(0.14)          | 0.34( <b>0.00</b> ) |
| 16    | 0.33  | 0.28(-0.15)        | 0.36(0.07)           | 0.36( <b>0.00</b> )  | 0.46  | 0.44(-0.04)        | 0.54(0.17)          | 0.54( <b>0.00</b> ) |
| 17    | 0.27  | 0.24(-0.10)        | 0.29(0.08)           | 0.29( <b>0.00</b> )  | 0.55  | 0.52(-0.05)        | 0.59(0.07)          | 0.59( <b>0.00</b> ) |
| 18    | 0.28  | 0.25(-0.12)        | 0.29(0.03)           | 0.28(-0.03)          | 0.39  | 0.38(-0.04)        | 0.43(0.10)          | 0.43( <b>0.00</b> ) |
| 19    | 0.37  | 0.31(-0.16)        | 0.41(0.12)           | 0.40(-0.04)          | 0.41  | 0.34(-0.16)        | 0.44(0.07)          | 0.44( <b>0.00</b> ) |
| 20    | 0.47  | 0.40(-0.15)        | 0.51(0.07)           | 0.48(-0.05)          | 0.47  | 0.44(-0.07)        | 0.50(0.06)          | 0.51(0.02)          |
| 21    | 0.49  | 0.44(-0.10)        | 0.50(0.02)           | 0.51( <b>0.01</b> )  | 0.47  | 0.46(-0.02)        | 0.47( <b>0.00</b> ) | 0.48(0.01)          |
| 22    | 0.35  | 0.30(-0.15)        | 0.42(0.19)           | 0.41(- <b>0.01</b> ) | 0.32  | 0.28(-0.11)        | 0.41(0.27)          | 0.42(0.02)          |
| 23    | 0.42  | 0.37(-0.12)        | 0.47(0.12)           | 0.46(-0.03)          | 0.29  | 0.22(-0.24)        | 0.43(0.47)          | 0.43( <b>0.00</b> ) |
| 24    | 0.45  | 0.41(-0.08)        | 0.45( <b>0.01</b> )  | 0.44(-0.02)          | 0.50  | 0.47(-0.06)        | 0.53(0.06)          | 0.53( <b>0.00</b> ) |
| 25    | 0.50  | 0.45(-0.10)        | 0.53(0.05)           | 0.51(-0.03)          | 0.45  | 0.42(-0.08)        | 0.48(0.06)          | 0.48( <b>0.00</b> ) |
| Mean  | 0.38  | 0.33(-0.14)        | 0.42(0.10)           | 0.42(0.00)           | 0.40  | 0.37(-0.09)        | 0.46(0.14)          | 0.46(0.00)          |

<sup>a</sup> In parentheses is the gain in prediction accuracy with SG-UR over SG-SR; <sup>b</sup> In parentheses is the gain in prediction accuracy with UG-SR over SG-SR;

<sup>c</sup> In parentheses is the gain in prediction accuracy with UG-UR over UG-SR; Bold in parentheses indicates the number is not significant at  $\alpha = 0.05$ .

**Table S24** Accuracy of WP prediction for environment E2 with four ME GWP models in CV1

| PopId | LL    |                     |                     |                      | LW    |                    |                     |                     |
|-------|-------|---------------------|---------------------|----------------------|-------|--------------------|---------------------|---------------------|
|       | SG-SR | SG-UR <sup>a</sup>  | UG-SR <sup>b</sup>  | UG-UR <sup>c</sup>   | SG-SR | SG-UR <sup>a</sup> | UG-SR <sup>b</sup>  | UG-UR <sup>c</sup>  |
| 1     | 0.67  | 0.67( <b>0.00</b> ) | 0.67( <b>0.00</b> ) | 0.67( <b>0.00</b> )  | 0.46  | 0.43(-0.06)        | 0.50(0.09)          | 0.50( <b>0.00</b> ) |
| 2     | 0.40  | 0.36(-0.10)         | 0.42(0.04)          | 0.40(-0.03)          | 0.49  | 0.46(-0.07)        | 0.53(0.07)          | 0.53( <b>0.00</b> ) |
| 3     | 0.17  | 0.13(-0.21)         | 0.19(0.14)          | 0.18(-0.06)          | 0.59  | 0.57(-0.04)        | 0.61(0.03)          | 0.61( <b>0.00</b> ) |
| 4     | 0.56  | 0.54(-0.04)         | 0.57(0.03)          | 0.57( <b>0.00</b> )  | 0.59  | 0.57(-0.03)        | 0.62(0.04)          | 0.62( <b>0.00</b> ) |
| 5     | 0.50  | 0.47(-0.07)         | 0.51(0.02)          | 0.51( <b>0.00</b> )  | 0.45  | 0.39(-0.12)        | 0.48(0.07)          | 0.46(-0.03)         |
| 6     | 0.49  | 0.43(-0.11)         | 0.51(0.06)          | 0.50(-0.03)          | 0.33  | 0.32(-0.04)        | 0.34(0.03)          | 0.34( <b>0.00</b> ) |
| 7     | 0.42  | 0.36(-0.14)         | 0.52(0.23)          | 0.51(-0.03)          | 0.58  | 0.54(-0.06)        | 0.61(0.06)          | 0.62(0.01)          |
| 8     | 0.35  | 0.27(-0.23)         | 0.40(0.14)          | 0.37(-0.08)          | 0.35  | 0.29(-0.17)        | 0.41(0.17)          | 0.42(0.03)          |
| 9     | 0.30  | 0.25(-0.19)         | 0.34(0.12)          | 0.32(-0.07)          | 0.44  | 0.41(-0.06)        | 0.44( <b>0.00</b> ) | 0.43(-0.02)         |
| 10    | 0.50  | 0.43(-0.12)         | 0.52(0.05)          | 0.51(-0.03)          | 0.36  | 0.26(-0.26)        | 0.39(0.08)          | 0.36(-0.07)         |
| 11    | 0.52  | 0.50(-0.05)         | 0.55(0.04)          | 0.55( <b>0.00</b> )  | 0.40  | 0.39(-0.03)        | 0.43(0.07)          | 0.43( <b>0.00</b> ) |
| 12    | 0.56  | 0.51(-0.10)         | 0.60(0.08)          | 0.59(-0.02)          | 0.58  | 0.56(-0.03)        | 0.61(0.05)          | 0.61( <b>0.00</b> ) |
| 13    | 0.40  | 0.32(-0.20)         | 0.44(0.08)          | 0.45(0.03)           | 0.39  | 0.32(-0.19)        | 0.47(0.20)          | 0.47( <b>0.00</b> ) |
| 14    | 0.42  | 0.38(-0.11)         | 0.44(0.05)          | 0.42(-0.04)          | 0.27  | 0.19(-0.29)        | 0.37(0.40)          | 0.36(-0.04)         |
| 15    | 0.46  | 0.43(-0.08)         | 0.45(-0.03)         | 0.46(0.02)           | 0.55  | 0.53(-0.04)        | 0.58(0.05)          | 0.58( <b>0.00</b> ) |
| 16    | 0.31  | 0.26(-0.16)         | 0.33(0.06)          | 0.32(-0.02)          | 0.56  | 0.55(-0.02)        | 0.58(0.03)          | 0.59(0.01)          |
| 17    | 0.13  | 0.08(-0.40)         | 0.20(0.52)          | 0.19(- <b>0.02</b> ) | 0.61  | 0.59(-0.03)        | 0.64(0.04)          | 0.64( <b>0.00</b> ) |
| 18    | 0.29  | 0.23(-0.20)         | 0.32(0.12)          | 0.31(-0.03)          | 0.30  | 0.27(-0.08)        | 0.42(0.42)          | 0.43( <b>0.01</b> ) |
| 19    | 0.28  | 0.20(-0.29)         | 0.34(0.20)          | 0.30(-0.12)          | 0.40  | 0.35(-0.11)        | 0.45(0.14)          | 0.46(0.02)          |
| 20    | 0.52  | 0.46(-0.12)         | 0.55(0.05)          | 0.54(-0.02)          | 0.53  | 0.50(-0.07)        | 0.56(0.04)          | 0.56( <b>0.00</b> ) |
| 21    | 0.58  | 0.54(-0.08)         | 0.61(0.04)          | 0.61( <b>0.00</b> )  | 0.35  | 0.32(-0.09)        | 0.41(0.19)          | 0.40(-0.02)         |
| 22    | 0.49  | 0.47(-0.05)         | 0.50(0.02)          | 0.50( <b>0.00</b> )  | 0.58  | 0.56(-0.03)        | 0.59(0.02)          | 0.60(0.01)          |
| 23    | 0.43  | 0.39(-0.10)         | 0.47(0.09)          | 0.46(- <b>0.01</b> ) | 0.36  | 0.32(-0.12)        | 0.40(0.11)          | 0.41(0.01)          |
| 24    | 0.16  | 0.08(-0.53)         | 0.27(0.63)          | 0.25(-0.06)          | 0.42  | 0.39(-0.08)        | 0.48(0.14)          | 0.48( <b>0.00</b> ) |
| 25    | 0.38  | 0.31(-0.20)         | 0.45(0.17)          | 0.42(-0.07)          | 0.47  | 0.42(-0.12)        | 0.48(0.01)          | 0.45(-0.05)         |
| Mean  | 0.41  | 0.36(-0.12)         | 0.45(0.08)          | 0.44(-0.02)          | 0.46  | 0.42(-0.08)        | 0.50(0.09)          | 0.49(-0.01)         |

<sup>a</sup> In parentheses is the gain in prediction accuracy with SG-UR over SG-SR; <sup>b</sup> In parentheses is the gain in prediction accuracy with UG-SR over SG-SR;

<sup>c</sup> In parentheses is the gain in prediction accuracy with UG-UR over UG-SR; Bold in parentheses indicates the number is not significant at  $\alpha = 0.05$ .

**Table S25 Accuracy of WP prediction for environment E3 with four ME GWP models in CV1**

| PopId | LL    |                    |                    |                     | LW    |                    |                    |                     |
|-------|-------|--------------------|--------------------|---------------------|-------|--------------------|--------------------|---------------------|
|       | SG-SR | SG-UR <sup>a</sup> | UG-SR <sup>b</sup> | UG-UR <sup>c</sup>  | SG-SR | SG-UR <sup>a</sup> | UG-SR <sup>b</sup> | UG-UR <sup>c</sup>  |
| 1     | 0.51  | 0.47(-0.06)        | 0.55(0.09)         | 0.55( <b>0.00</b> ) | 0.36  | 0.33(-0.08)        | 0.41(0.13)         | 0.41( <b>0.00</b> ) |
| 2     | 0.35  | 0.29(-0.17)        | 0.38(0.10)         | 0.36(-0.06)         | 0.52  | 0.49(-0.05)        | 0.55(0.06)         | 0.55( <b>0.00</b> ) |
| 3     | 0.24  | 0.20(-0.17)        | 0.26(0.10)         | 0.26( <b>0.00</b> ) | 0.27  | 0.23(-0.18)        | 0.37(0.35)         | 0.37( <b>0.00</b> ) |
| 4     | 0.50  | 0.45(-0.10)        | 0.55(0.10)         | 0.54(-0.02)         | 0.18  | 0.12(-0.32)        | 0.28(0.56)         | 0.29(0.00)          |
| 5     | 0.44  | 0.39(-0.11)        | 0.46(0.05)         | 0.46( <b>0.00</b> ) | 0.30  | 0.22(-0.26)        | 0.39(0.29)         | 0.39( <b>0.00</b> ) |
| 6     | 0.47  | 0.40(-0.15)        | 0.54(0.14)         | 0.54( <b>0.00</b> ) | 0.31  | 0.29(-0.07)        | 0.35(0.15)         | 0.35( <b>0.00</b> ) |
| 7     | 0.49  | 0.44(-0.10)        | 0.55(0.13)         | 0.55( <b>0.00</b> ) | 0.42  | 0.38(-0.10)        | 0.49(0.17)         | 0.50(0.01)          |
| 8     | 0.32  | 0.24(-0.26)        | 0.38(0.18)         | 0.35(-0.07)         | 0.48  | 0.44(-0.07)        | 0.49(0.03)         | 0.49( <b>0.00</b> ) |
| 9     | 0.42  | 0.36(-0.13)        | 0.45(0.07)         | 0.45( <b>0.00</b> ) | 0.45  | 0.43(-0.05)        | 0.48(0.07)         | 0.48( <b>0.00</b> ) |
| 10    | 0.42  | 0.34(-0.20)        | 0.48(0.13)         | 0.48( <b>0.00</b> ) | 0.56  | 0.52(-0.08)        | 0.58(0.04)         | 0.56(-0.04)         |
| 11    | 0.54  | 0.51(-0.05)        | 0.56(0.04)         | 0.56( <b>0.00</b> ) | 0.36  | 0.35(-0.03)        | 0.41(0.14)         | 0.41( <b>0.00</b> ) |
| 12    | 0.43  | 0.35(-0.17)        | 0.49(0.15)         | 0.50(0.02)          | 0.28  | 0.23(-0.17)        | 0.37(0.35)         | 0.38(0.00)          |
| 13    | 0.41  | 0.31(-0.25)        | 0.45(0.09)         | 0.43(-0.05)         | 0.26  | 0.16(-0.37)        | 0.35(0.38)         | 0.35( <b>0.00</b> ) |
| 14    | 0.31  | 0.23(-0.24)        | 0.35(0.15)         | 0.35( <b>0.00</b> ) | 0.32  | 0.27(-0.16)        | 0.42(0.28)         | 0.42( <b>0.00</b> ) |
| 15    | 0.25  | 0.15(-0.39)        | 0.30(0.21)         | 0.30( <b>0.00</b> ) | 0.40  | 0.37(-0.07)        | 0.47(0.19)         | 0.48(0.01)          |
| 16    | 0.32  | 0.28(-0.15)        | 0.34(0.05)         | 0.33(-0.02)         | 0.36  | 0.34(-0.06)        | 0.45(0.26)         | 0.45( <b>0.00</b> ) |
| 17    | 0.32  | 0.28(-0.13)        | 0.37(0.14)         | 0.37( <b>0.00</b> ) | 0.38  | 0.33(-0.13)        | 0.45(0.17)         | 0.45( <b>0.00</b> ) |
| 18    | 0.17  | 0.12(-0.28)        | 0.20(0.16)         | 0.21( <b>0.02</b> ) | 0.33  | 0.31(-0.06)        | 0.39(0.19)         | 0.39( <b>0.00</b> ) |
| 19    | 0.46  | 0.41(-0.11)        | 0.48(0.06)         | 0.47(-0.03)         | 0.44  | 0.40(-0.09)        | 0.46(0.05)         | 0.46( <b>0.00</b> ) |
| 20    | 0.34  | 0.25(-0.27)        | 0.40(0.19)         | 0.39(-0.02)         | 0.43  | 0.39(-0.09)        | 0.47(0.08)         | 0.46(-0.01)         |
| 21    | 0.47  | 0.41(-0.14)        | 0.53(0.12)         | 0.54(0.02)          | 0.38  | 0.37(-0.04)        | 0.42(0.11)         | 0.42( <b>0.00</b> ) |
| 22    | 0.38  | 0.34(-0.10)        | 0.41(0.08)         | 0.40(-0.01)         | 0.35  | 0.31(-0.09)        | 0.42(0.20)         | 0.43(0.02)          |
| 23    | 0.32  | 0.26(-0.19)        | 0.41(0.30)         | 0.42(0.01)          | 0.38  | 0.33(-0.13)        | 0.43(0.13)         | 0.42(-0.02)         |
| 24    | 0.26  | 0.19(-0.25)        | 0.30(0.16)         | 0.27(-0.09)         | 0.41  | 0.37(-0.10)        | 0.47(0.13)         | 0.48(0.02)          |
| 25    | 0.37  | 0.28(-0.25)        | 0.44(0.21)         | 0.40(-0.09)         | 0.29  | 0.24(-0.15)        | 0.33(0.15)         | 0.34(0.02)          |
| Mean  | 0.38  | 0.32(-0.16)        | 0.43(0.12)         | 0.42(-0.02)         | 0.37  | 0.33(-0.11)        | 0.43(0.16)         | 0.43(0.00)          |

<sup>a</sup> In parentheses is the gain in prediction accuracy with SG-UR over SG-SR; <sup>b</sup> In parentheses is the gain in prediction accuracy with UG-SR over SG-SR;

<sup>c</sup> In parentheses is the gain in prediction accuracy with UG-UR over UG-SR; Bold in parentheses indicates the number is not significant at  $\alpha = 0.05$ .

**Table S26 Accuracy of WP prediction for environment E4 with four ME GWP models in CV1**

| PopId | LL    |                    |                    |                     | LW    |                    |                    |                     |
|-------|-------|--------------------|--------------------|---------------------|-------|--------------------|--------------------|---------------------|
|       | SG-SR | SG-UR <sup>a</sup> | UG-SR <sup>b</sup> | UG-UR <sup>c</sup>  | SG-SR | SG-UR <sup>a</sup> | UG-SR <sup>b</sup> | UG-UR <sup>c</sup>  |
| 1     | 0.47  | 0.44(-0.06)        | 0.51(0.09)         | 0.51( <b>0.00</b> ) | 0.50  | 0.48(-0.05)        | 0.54(0.08)         | 0.54( <b>0.00</b> ) |
| 2     | 0.30  | 0.25(-0.17)        | 0.34(0.13)         | 0.32(-0.05)         | 0.48  | 0.43(-0.10)        | 0.51(0.05)         | 0.51( <b>0.00</b> ) |
| 3     | 0.26  | 0.24(-0.10)        | 0.27(0.04)         | 0.27( <b>0.00</b> ) | 0.42  | 0.39(-0.07)        | 0.52(0.23)         | 0.52( <b>0.00</b> ) |
| 4     | 0.52  | 0.48(-0.08)        | 0.56(0.08)         | 0.56( <b>0.00</b> ) | 0.51  | 0.49(-0.05)        | 0.54(0.06)         | 0.54( <b>0.00</b> ) |
| 5     | 0.35  | 0.30(-0.15)        | 0.39(0.12)         | 0.39( <b>0.00</b> ) | 0.45  | 0.40(-0.11)        | 0.48(0.08)         | 0.47(-0.03)         |
| 6     | 0.45  | 0.38(-0.15)        | 0.52(0.16)         | 0.51(-0.02)         | 0.30  | 0.28(-0.08)        | 0.36(0.19)         | 0.36( <b>0.00</b> ) |
| 7     | 0.60  | 0.56(-0.06)        | 0.63(0.05)         | 0.62(-0.01)         | 0.62  | 0.60(-0.03)        | 0.64(0.04)         | 0.65(0.00)          |
| 8     | 0.40  | 0.32(-0.19)        | 0.44(0.12)         | 0.43(-0.04)         | 0.40  | 0.34(-0.14)        | 0.45(0.12)         | 0.45( <b>0.00</b> ) |
| 9     | 0.34  | 0.27(-0.19)        | 0.38(0.12)         | 0.37(-0.03)         | 0.47  | 0.45(-0.05)        | 0.48(0.01)         | 0.47(-0.02)         |
| 10    | 0.41  | 0.34(-0.18)        | 0.45(0.09)         | 0.43(-0.03)         | 0.63  | 0.59(-0.05)        | 0.65(0.04)         | 0.64(-0.01)         |
| 11    | 0.29  | 0.23(-0.18)        | 0.38(0.33)         | 0.38( <b>0.00</b> ) | 0.44  | 0.43(-0.03)        | 0.49(0.11)         | 0.49( <b>0.00</b> ) |
| 12    | 0.50  | 0.44(-0.12)        | 0.56(0.11)         | 0.54(-0.03)         | 0.57  | 0.54(-0.04)        | 0.59(0.05)         | 0.60(0.01)          |
| 13    | 0.24  | 0.08(-0.68)        | 0.30(0.28)         | 0.34(0.12)          | 0.42  | 0.37(-0.12)        | 0.49(0.17)         | 0.49( <b>0.00</b> ) |
| 14    | 0.34  | 0.27(-0.21)        | 0.39(0.13)         | 0.37(-0.05)         | 0.45  | 0.40(-0.11)        | 0.49(0.08)         | 0.49( <b>0.00</b> ) |
| 15    | 0.36  | 0.29(-0.19)        | 0.38(0.06)         | 0.37(-0.02)         | 0.53  | 0.51(-0.05)        | 0.55(0.04)         | 0.56(0.01)          |
| 16    | 0.20  | 0.13(-0.38)        | 0.28(0.39)         | 0.28( <b>0.00</b> ) | 0.53  | 0.51(-0.03)        | 0.57(0.08)         | 0.57( <b>0.00</b> ) |
| 17    | 0.34  | 0.30(-0.10)        | 0.37(0.10)         | 0.36(-0.03)         | 0.56  | 0.54(-0.05)        | 0.60(0.07)         | 0.61(0.01)          |
| 18    | 0.26  | 0.22(-0.17)        | 0.29(0.10)         | 0.28(-0.03)         | 0.31  | 0.29(-0.06)        | 0.38(0.22)         | 0.38( <b>0.00</b> ) |
| 19    | 0.26  | 0.18(-0.28)        | 0.32(0.26)         | 0.31(-0.02)         | 0.51  | 0.46(-0.09)        | 0.54(0.07)         | 0.55(0.01)          |
| 20    | 0.46  | 0.39(-0.15)        | 0.49(0.08)         | 0.48(-0.03)         | 0.52  | 0.49(-0.05)        | 0.54(0.03)         | 0.55(0.02)          |
| 21    | 0.61  | 0.56(-0.09)        | 0.64(0.04)         | 0.64( <b>0.00</b> ) | 0.36  | 0.34(-0.06)        | 0.41(0.13)         | 0.41( <b>0.00</b> ) |
| 22    | 0.47  | 0.44(-0.06)        | 0.48(0.02)         | 0.48( <b>0.00</b> ) | 0.55  | 0.52(-0.04)        | 0.59(0.07)         | 0.59( <b>0.00</b> ) |
| 23    | 0.39  | 0.33(-0.14)        | 0.45(0.17)         | 0.45( <b>0.00</b> ) | 0.48  | 0.44(-0.08)        | 0.51(0.06)         | 0.51( <b>0.00</b> ) |
| 24    | 0.26  | 0.18(-0.30)        | 0.32(0.23)         | 0.29(-0.07)         | 0.47  | 0.42(-0.10)        | 0.51(0.09)         | 0.51( <b>0.00</b> ) |
| 25    | 0.26  | 0.17(-0.33)        | 0.34(0.35)         | 0.33(-0.06)         | 0.48  | 0.44(-0.09)        | 0.49(0.01)         | 0.47(-0.04)         |
| Mean  | 0.37  | 0.31(-0.16)        | 0.42(0.13)         | 0.41(-0.02)         | 0.48  | 0.45(-0.07)        | 0.52(0.08)         | 0.52(0.00)          |

<sup>a</sup> In parentheses is the gain in prediction accuracy with SG-UR over SG-SR; <sup>b</sup> In parentheses is the gain in prediction accuracy with UG-SR over SG-SR;

<sup>c</sup> In parentheses is the gain in prediction accuracy with UG-UR over UG-SR; Bold in parentheses indicates the number is not significant at  $\alpha = 0.05$ .

**Table S27 Accuracy of AP prediction for environment E1 with four ME GWP models in CV1**

| PopId | LL    |                     |                     |                     | LW    |                     |                     |                      |
|-------|-------|---------------------|---------------------|---------------------|-------|---------------------|---------------------|----------------------|
|       | SG-SR | SG-UR <sup>a</sup>  | UG-SR <sup>b</sup>  | UG-UR <sup>c</sup>  | SG-SR | SG-UR <sup>a</sup>  | UG-SR <sup>b</sup>  | UG-UR <sup>c</sup>   |
| 1     | 0.31  | 0.30(-0.04)         | 0.34(0.07)          | 0.33(-0.02)         | 0.25  | 0.24(-0.07)         | 0.27(0.08)          | 0.26(-0.05)          |
| 2     | 0.19  | 0.17(-0.11)         | 0.21(0.12)          | 0.20(-0.06)         | 0.42  | 0.42( <b>0.00</b> ) | 0.42( <b>0.00</b> ) | 0.42( <b>0.00</b> )  |
| 3     | 0.21  | 0.21( <b>0.00</b> ) | 0.19(-0.05)         | 0.20(0.05)          | 0.54  | 0.53(-0.02)         | 0.54( <b>0.00</b> ) | 0.55(0.01)           |
| 4     | 0.41  | 0.41( <b>0.00</b> ) | 0.39(-0.04)         | 0.41(0.04)          | 0.29  | 0.30(0.01)          | 0.28(-0.04)         | 0.28( <b>0.00</b> )  |
| 5     | 0.28  | 0.29(0.04)          | 0.25(-0.08)         | 0.26(0.04)          | 0.23  | 0.22(-0.03)         | 0.24(0.04)          | 0.24( <b>0.00</b> )  |
| 6     | 0.46  | 0.44(-0.03)         | 0.47(0.02)          | 0.47( <b>0.00</b> ) | 0.37  | 0.37( <b>0.00</b> ) | 0.39(0.05)          | 0.39( <b>0.00</b> )  |
| 7     | 0.24  | 0.23(-0.07)         | 0.27(0.12)          | 0.26(-0.02)         | 0.36  | 0.34(-0.06)         | 0.41(0.14)          | 0.39(-0.04)          |
| 8     | 0.47  | 0.45(-0.04)         | 0.47( <b>0.00</b> ) | 0.47( <b>0.00</b> ) | 0.39  | 0.38(-0.02)         | 0.39( <b>0.00</b> ) | 0.39( <b>0.00</b> )  |
| 9     | 0.36  | 0.35(-0.03)         | 0.38(0.05)          | 0.38( <b>0.00</b> ) | 0.16  | 0.16( <b>0.00</b> ) | 0.16( <b>0.00</b> ) | 0.17(0.01)           |
| 10    | 0.37  | 0.37( <b>0.00</b> ) | 0.38(0.02)          | 0.38( <b>0.00</b> ) | 0.46  | 0.44(-0.04)         | 0.49(0.07)          | 0.48(-0.02)          |
| 11    | 0.07  | 0.05(-0.26)         | 0.11(0.51)          | 0.09(-0.16)         | 0.17  | 0.16(-0.04)         | 0.18(0.06)          | 0.18( <b>0.00</b> )  |
| 12    | 0.39  | 0.37(-0.03)         | 0.40(0.03)          | 0.40( <b>0.00</b> ) | 0.59  | 0.58(-0.02)         | 0.61(0.03)          | 0.61( <b>0.00</b> )  |
| 13    | 0.29  | 0.26(-0.11)         | 0.34(0.19)          | 0.32(-0.06)         | 0.42  | 0.42( <b>0.00</b> ) | 0.43(0.02)          | 0.43( <b>0.00</b> )  |
| 14    | 0.40  | 0.39(-0.02)         | 0.40( <b>0.00</b> ) | 0.40( <b>0.00</b> ) | 0.36  | 0.34(-0.04)         | 0.38(0.07)          | 0.38( <b>0.00</b> )  |
| 15    | 0.24  | 0.25( <b>0.01</b> ) | 0.23(-0.07)         | 0.24(0.04)          | 0.31  | 0.31( <b>0.00</b> ) | 0.32( <b>0.01</b> ) | 0.31(- <b>0.01</b> ) |
| 16    | 0.27  | 0.26(-0.04)         | 0.27( <b>0.00</b> ) | 0.28( <b>0.01</b> ) | 0.52  | 0.52( <b>0.00</b> ) | 0.52( <b>0.00</b> ) | 0.52( <b>0.00</b> )  |
| 17    | 0.29  | 0.28(-0.03)         | 0.29( <b>0.00</b> ) | 0.30(0.01)          | 0.43  | 0.42(-0.02)         | 0.45(0.05)          | 0.46( <b>0.01</b> )  |
| 18    | 0.14  | 0.13(-0.05)         | 0.14( <b>0.00</b> ) | 0.14( <b>0.00</b> ) | 0.30  | 0.28(-0.05)         | 0.33(0.10)          | 0.31(-0.04)          |
| 19    | 0.30  | 0.29(-0.04)         | 0.31(0.03)          | 0.30(-0.01)         | 0.22  | 0.21(-0.02)         | 0.23(0.06)          | 0.23( <b>0.00</b> )  |
| 20    | 0.42  | 0.41(-0.03)         | 0.43(0.02)          | 0.43( <b>0.00</b> ) | 0.43  | 0.43( <b>0.00</b> ) | 0.44(0.02)          | 0.44( <b>0.00</b> )  |
| 21    | 0.33  | 0.31(-0.08)         | 0.36(0.10)          | 0.35(-0.03)         | 0.32  | 0.30(-0.07)         | 0.35(0.10)          | 0.34(-0.04)          |
| 22    | 0.35  | 0.35( <b>0.00</b> ) | 0.34(-0.03)         | 0.34( <b>0.00</b> ) | 0.29  | 0.29( <b>0.00</b> ) | 0.30(0.02)          | 0.30( <b>0.00</b> )  |
| 23    | 0.21  | 0.22(0.03)          | 0.20(-0.05)         | 0.20( <b>0.00</b> ) | 0.15  | 0.13(-0.10)         | 0.19(0.28)          | 0.18(-0.04)          |
| 24    | 0.27  | 0.29(0.06)          | 0.23(-0.15)         | 0.25(0.07)          | 0.45  | 0.45( <b>0.00</b> ) | 0.45( <b>0.00</b> ) | 0.45( <b>0.00</b> )  |
| 25    | 0.42  | 0.42( <b>0.00</b> ) | 0.40(-0.05)         | 0.42(0.04)          | 0.47  | 0.45(-0.02)         | 0.47( <b>0.00</b> ) | 0.47( <b>0.00</b> )  |
| Mean  | 0.31  | 0.30(-0.03)         | 0.31(0.02)          | 0.31(0.00)          | 0.36  | 0.35(-0.02)         | 0.37(0.04)          | 0.37(0.00)           |

<sup>a</sup> In parentheses is the gain in prediction accuracy with SG-UR over SG-SR; <sup>b</sup> In parentheses is the gain in prediction accuracy with UG-SR over SG-SR;

<sup>c</sup> In parentheses is the gain in prediction accuracy with UG-UR over UG-SR; Bold in parentheses indicates the number is not significant at  $\alpha = 0.05$ .

**Table S28 Accuracy of AP prediction for environment E2 with four ME GWP models in CV1**

| PopId | LL    |                      |                     |                     | LW    |                      |                     |                     |
|-------|-------|----------------------|---------------------|---------------------|-------|----------------------|---------------------|---------------------|
|       | SG-SR | SG-UR <sup>a</sup>   | UG-SR <sup>b</sup>  | UG-UR <sup>c</sup>  | SG-SR | SG-UR <sup>a</sup>   | UG-SR <sup>b</sup>  | UG-UR <sup>c</sup>  |
| 1     | 0.39  | 0.39( <b>0.00</b> )  | 0.37(-0.03)         | 0.38(0.01)          | 0.21  | 0.20(-0.07)          | 0.24(0.14)          | 0.24( <b>0.00</b> ) |
| 2     | 0.28  | 0.26(-0.09)          | 0.31(0.09)          | 0.29(-0.05)         | 0.44  | 0.43(-0.02)          | 0.46(0.04)          | 0.45(-0.01)         |
| 3     | 0.29  | 0.30(0.02)           | 0.27(-0.08)         | 0.28(0.05)          | 0.54  | 0.53(-0.01)          | 0.54( <b>0.00</b> ) | 0.54( <b>0.00</b> ) |
| 4     | 0.38  | 0.37(-0.03)          | 0.39(0.01)          | 0.39( <b>0.00</b> ) | 0.34  | 0.33(-0.03)          | 0.36(0.06)          | 0.36( <b>0.00</b> ) |
| 5     | 0.33  | 0.33( <b>0.00</b> )  | 0.32(-0.03)         | 0.32( <b>0.00</b> ) | 0.47  | 0.45(-0.03)          | 0.48(0.04)          | 0.48( <b>0.00</b> ) |
| 6     | 0.47  | 0.47( <b>0.00</b> )  | 0.47( <b>0.00</b> ) | 0.47( <b>0.00</b> ) | 0.28  | 0.28( <b>0.00</b> )  | 0.30(0.05)          | 0.30( <b>0.00</b> ) |
| 7     | 0.20  | 0.20( <b>0.00</b> )  | 0.21( <b>0.01</b> ) | 0.21( <b>0.00</b> ) | 0.60  | 0.60( <b>0.00</b> )  | 0.58(-0.03)         | 0.59(0.02)          |
| 8     | 0.25  | 0.23(-0.06)          | 0.27(0.08)          | 0.26(-0.03)         | 0.34  | 0.34( <b>0.00</b> )  | 0.34( <b>0.00</b> ) | 0.35(0.01)          |
| 9     | 0.23  | 0.22(-0.01)          | 0.22(-0.03)         | 0.22( <b>0.00</b> ) | 0.34  | 0.34( <b>0.00</b> )  | 0.34( <b>0.00</b> ) | 0.34( <b>0.00</b> ) |
| 10    | 0.47  | 0.46(-0.02)          | 0.46(-0.01)         | 0.47(0.02)          | 0.41  | 0.40(-0.04)          | 0.45(0.09)          | 0.45( <b>0.00</b> ) |
| 11    | 0.29  | 0.27(-0.07)          | 0.31(0.06)          | 0.30(-0.02)         | 0.37  | 0.37( <b>0.00</b> )  | 0.38(0.02)          | 0.37(-0.01)         |
| 12    | 0.41  | 0.40(-0.02)          | 0.41( <b>0.00</b> ) | 0.41( <b>0.00</b> ) | 0.62  | 0.60(-0.02)          | 0.62( <b>0.00</b> ) | 0.63(0.00)          |
| 13    | 0.35  | 0.35( <b>0.00</b> )  | 0.35( <b>0.00</b> ) | 0.35( <b>0.00</b> ) | 0.41  | 0.40(- <b>0.01</b> ) | 0.40(-0.03)         | 0.40( <b>0.00</b> ) |
| 14    | 0.24  | 0.22(-0.10)          | 0.28(0.15)          | 0.26(-0.05)         | 0.37  | 0.36(-0.03)          | 0.39(0.06)          | 0.39( <b>0.00</b> ) |
| 15    | 0.30  | 0.30( <b>0.00</b> )  | 0.27(-0.07)         | 0.29(0.06)          | 0.53  | 0.53( <b>0.00</b> )  | 0.52(-0.03)         | 0.52( <b>0.00</b> ) |
| 16    | 0.42  | 0.41(-0.02)          | 0.41(-0.02)         | 0.42(0.02)          | 0.53  | 0.53( <b>0.00</b> )  | 0.54(0.02)          | 0.54( <b>0.00</b> ) |
| 17    | 0.11  | 0.09(-0.17)          | 0.13(0.17)          | 0.12(-0.06)         | 0.60  | 0.60( <b>0.00</b> )  | 0.57(-0.05)         | 0.59(0.03)          |
| 18    | 0.20  | 0.20( <b>0.00</b> )  | 0.18(-0.08)         | 0.19(0.06)          | 0.23  | 0.23( <b>0.00</b> )  | 0.22(-0.06)         | 0.22( <b>0.00</b> ) |
| 19    | 0.39  | 0.37(-0.05)          | 0.41(0.03)          | 0.40(-0.01)         | 0.40  | 0.40( <b>0.00</b> )  | 0.39(-0.02)         | 0.39( <b>0.00</b> ) |
| 20    | 0.41  | 0.40(-0.01)          | 0.41( <b>0.00</b> ) | 0.41( <b>0.00</b> ) | 0.44  | 0.43(-0.01)          | 0.43(-0.02)         | 0.43( <b>0.00</b> ) |
| 21    | 0.47  | 0.46(-0.02)          | 0.47( <b>0.00</b> ) | 0.47( <b>0.00</b> ) | 0.45  | 0.44(-0.02)          | 0.45( <b>0.00</b> ) | 0.45( <b>0.00</b> ) |
| 22    | 0.43  | 0.42(-0.03)          | 0.44(0.02)          | 0.43(-0.01)         | 0.40  | 0.40( <b>0.00</b> )  | 0.42(0.04)          | 0.42( <b>0.00</b> ) |
| 23    | 0.35  | 0.34(- <b>0.01</b> ) | 0.34(-0.01)         | 0.35(0.02)          | 0.38  | 0.37(-0.04)          | 0.40(0.04)          | 0.40( <b>0.00</b> ) |
| 24    | 0.21  | 0.20(-0.03)          | 0.21( <b>0.00</b> ) | 0.21( <b>0.00</b> ) | 0.45  | 0.46(0.02)           | 0.44(-0.03)         | 0.45(0.03)          |
| 25    | 0.24  | 0.23(-0.04)          | 0.25(0.05)          | 0.24(-0.03)         | 0.35  | 0.33(-0.04)          | 0.37(0.07)          | 0.37( <b>0.00</b> ) |
| Mean  | 0.32  | 0.32(-0.02)          | 0.33(0.01)          | 0.33(0.00)          | 0.42  | 0.41(-0.01)          | 0.42(0.01)          | 0.43(0.00)          |

<sup>a</sup> In parentheses is the gain in prediction accuracy with SG-UR over SG-SR; <sup>b</sup> In parentheses is the gain in prediction accuracy with UG-SR over SG-SR;

<sup>c</sup> In parentheses is the gain in prediction accuracy with UG-UR over UG-SR; Bold in parentheses indicates the number is not significant at  $\alpha = 0.05$ .



**Table S29 Accuracy of AP prediction for environment E3 with four ME GWP models in CV1**

| PopId | LL    |                     |                      |                     | LW    |                     |                     |                     |
|-------|-------|---------------------|----------------------|---------------------|-------|---------------------|---------------------|---------------------|
|       | SG-SR | SG-UR <sup>a</sup>  | UG-SR <sup>b</sup>   | UG-UR <sup>c</sup>  | SG-SR | SG-UR <sup>a</sup>  | UG-SR <sup>b</sup>  | UG-UR <sup>c</sup>  |
| 1     | 0.37  | 0.37( <b>0.00</b> ) | 0.38(0.01)           | 0.37(-0.01)         | 0.24  | 0.23(-0.04)         | 0.25(0.04)          | 0.25( <b>0.00</b> ) |
| 2     | 0.27  | 0.25(-0.09)         | 0.31(0.12)           | 0.30(-0.03)         | 0.46  | 0.45(-0.02)         | 0.47(0.03)          | 0.47( <b>0.00</b> ) |
| 3     | 0.22  | 0.23(0.04)          | 0.20(-0.11)          | 0.21(0.07)          | 0.37  | 0.37( <b>0.00</b> ) | 0.34(-0.07)         | 0.36(0.04)          |
| 4     | 0.42  | 0.42( <b>0.00</b> ) | 0.40(-0.04)          | 0.41(0.03)          | 0.22  | 0.21(-0.04)         | 0.24(0.08)          | 0.24( <b>0.00</b> ) |
| 5     | 0.20  | 0.19(-0.05)         | 0.21(0.07)           | 0.21( <b>0.00</b> ) | 0.44  | 0.44( <b>0.00</b> ) | 0.42(-0.03)         | 0.43( <b>0.01</b> ) |
| 6     | 0.47  | 0.46(-0.01)         | 0.46(- <b>0.01</b> ) | 0.46( <b>0.00</b> ) | 0.26  | 0.26( <b>0.00</b> ) | 0.27( <b>0.01</b> ) | 0.26(-0.02)         |
| 7     | 0.20  | 0.19(-0.03)         | 0.19(-0.06)          | 0.20(0.04)          | 0.32  | 0.31(-0.04)         | 0.34(0.06)          | 0.33(-0.02)         |
| 8     | 0.29  | 0.27(-0.04)         | 0.30(0.06)           | 0.29(-0.03)         | 0.27  | 0.27( <b>0.00</b> ) | 0.28(0.03)          | 0.28( <b>0.00</b> ) |
| 9     | 0.35  | 0.35( <b>0.00</b> ) | 0.35( <b>0.00</b> )  | 0.36(0.02)          | 0.31  | 0.32(0.02)          | 0.29(-0.09)         | 0.30(0.04)          |
| 10    | 0.47  | 0.46(-0.01)         | 0.45(-0.05)          | 0.46(0.04)          | 0.56  | 0.56( <b>0.00</b> ) | 0.55(-0.01)         | 0.55( <b>0.00</b> ) |
| 11    | 0.22  | 0.21(-0.06)         | 0.23(0.05)           | 0.23( <b>0.00</b> ) | 0.26  | 0.25(-0.02)         | 0.27(0.06)          | 0.27( <b>0.00</b> ) |
| 12    | 0.32  | 0.31(-0.02)         | 0.30(-0.04)          | 0.31( <b>0.01</b> ) | 0.34  | 0.34( <b>0.00</b> ) | 0.34( <b>0.00</b> ) | 0.34( <b>0.00</b> ) |
| 13    | 0.36  | 0.34(-0.06)         | 0.41(0.12)           | 0.39(-0.05)         | 0.40  | 0.40( <b>0.00</b> ) | 0.37(-0.08)         | 0.38(0.03)          |
| 14    | 0.24  | 0.24( <b>0.00</b> ) | 0.24( <b>0.00</b> )  | 0.24( <b>0.00</b> ) | 0.26  | 0.25(-0.05)         | 0.29(0.13)          | 0.28(-0.04)         |
| 15    | 0.24  | 0.23(-0.06)         | 0.26(0.06)           | 0.25(-0.01)         | 0.49  | 0.48(-0.01)         | 0.50(0.01)          | 0.50( <b>0.00</b> ) |
| 16    | 0.16  | 0.14(-0.09)         | 0.17(0.09)           | 0.17( <b>0.00</b> ) | 0.46  | 0.44(-0.04)         | 0.50(0.11)          | 0.49(-0.03)         |
| 17    | 0.29  | 0.28(-0.04)         | 0.29( <b>0.00</b> )  | 0.29( <b>0.00</b> ) | 0.30  | 0.28(-0.06)         | 0.34(0.13)          | 0.33(-0.03)         |
| 18    | 0.11  | 0.09(-0.14)         | 0.14(0.29)           | 0.13(-0.07)         | 0.32  | 0.32( <b>0.00</b> ) | 0.33(0.02)          | 0.33( <b>0.00</b> ) |
| 19    | 0.36  | 0.35(-0.01)         | 0.35(-0.02)          | 0.35( <b>0.00</b> ) | 0.29  | 0.28(-0.01)         | 0.30(0.05)          | 0.30( <b>0.00</b> ) |
| 20    | 0.36  | 0.34(-0.06)         | 0.38(0.05)           | 0.38( <b>0.00</b> ) | 0.44  | 0.42(-0.03)         | 0.46(0.06)          | 0.46( <b>0.00</b> ) |
| 21    | 0.44  | 0.42(-0.05)         | 0.48(0.08)           | 0.46(-0.03)         | 0.40  | 0.39(-0.02)         | 0.41(0.03)          | 0.41( <b>0.00</b> ) |
| 22    | 0.20  | 0.19(-0.08)         | 0.22(0.08)           | 0.21(-0.02)         | 0.26  | 0.25(-0.02)         | 0.27(0.04)          | 0.26(-0.01)         |
| 23    | 0.22  | 0.22( <b>0.00</b> ) | 0.22( <b>0.00</b> )  | 0.23(0.01)          | 0.27  | 0.26(-0.03)         | 0.28(0.05)          | 0.28( <b>0.00</b> ) |
| 24    | 0.19  | 0.19( <b>0.00</b> ) | 0.18(-0.04)          | 0.19(0.04)          | 0.36  | 0.35(-0.03)         | 0.39(0.08)          | 0.38(-0.03)         |
| 25    | 0.39  | 0.40(0.01)          | 0.37(-0.06)          | 0.38(0.02)          | 0.24  | 0.23(-0.02)         | 0.23(-0.04)         | 0.24(0.03)          |
| Mean  | 0.29  | 0.29(0.00)          | 0.30(0.01)           | 0.30(0.00)          | 0.34  | 0.33(-0.02)         | 0.35(0.03)          | 0.35(0.00)          |

<sup>a</sup> In parentheses is the gain in prediction accuracy with SG-UR over SG-SR; <sup>b</sup> In parentheses is the gain in prediction accuracy with UG-SR over SG-SR;

<sup>c</sup> In parentheses is the gain in prediction accuracy with UG-UR over UG-SR; Bold in parentheses indicates the number is not significant at  $\alpha = 0.05$ .

**Table S30 Accuracy of AP prediction for environment E4 with four ME GWP models in CV1**

| PopId | LL    |                     |                     |                     | LW    |                     |                     |                     |
|-------|-------|---------------------|---------------------|---------------------|-------|---------------------|---------------------|---------------------|
|       | SG-SR | SG-UR <sup>a</sup>  | UG-SR <sup>b</sup>  | UG-UR <sup>c</sup>  | SG-SR | SG-UR <sup>a</sup>  | UG-SR <sup>b</sup>  | UG-UR <sup>c</sup>  |
| 1     | 0.26  | 0.26( <b>0.00</b> ) | 0.26( <b>0.00</b> ) | 0.27(0.03)          | 0.31  | 0.30(-0.03)         | 0.31( <b>0.00</b> ) | 0.31( <b>0.00</b> ) |
| 2     | 0.25  | 0.24(-0.03)         | 0.23(-0.09)         | 0.23( <b>0.00</b> ) | 0.43  | 0.42(-0.01)         | 0.43( <b>0.00</b> ) | 0.43( <b>0.00</b> ) |
| 3     | 0.24  | 0.23(-0.06)         | 0.24( <b>0.00</b> ) | 0.25(0.02)          | 0.39  | 0.39( <b>0.00</b> ) | 0.39( <b>0.00</b> ) | 0.40(0.03)          |
| 4     | 0.42  | 0.42( <b>0.00</b> ) | 0.43(0.02)          | 0.43( <b>0.00</b> ) | 0.29  | 0.29( <b>0.00</b> ) | 0.30(0.03)          | 0.29(-0.02)         |
| 5     | 0.38  | 0.38( <b>0.00</b> ) | 0.36(-0.05)         | 0.38(0.04)          | 0.33  | 0.32(-0.04)         | 0.36(0.08)          | 0.36( <b>0.00</b> ) |
| 6     | 0.46  | 0.44(-0.03)         | 0.48(0.06)          | 0.48( <b>0.00</b> ) | 0.33  | 0.32(-0.02)         | 0.33( <b>0.00</b> ) | 0.33( <b>0.00</b> ) |
| 7     | 0.32  | 0.31(-0.03)         | 0.30(-0.06)         | 0.31(0.04)          | 0.52  | 0.51(-0.01)         | 0.53(0.02)          | 0.53( <b>0.00</b> ) |
| 8     | 0.34  | 0.32(-0.05)         | 0.37(0.07)          | 0.35(-0.04)         | 0.39  | 0.39( <b>0.00</b> ) | 0.40(0.02)          | 0.40( <b>0.00</b> ) |
| 9     | 0.35  | 0.35( <b>0.00</b> ) | 0.35( <b>0.00</b> ) | 0.36(0.02)          | 0.40  | 0.39(-0.04)         | 0.42(0.04)          | 0.41(-0.01)         |
| 10    | 0.46  | 0.44(-0.04)         | 0.47(0.02)          | 0.48(0.02)          | 0.53  | 0.52(-0.02)         | 0.55(0.02)          | 0.54(-0.01)         |
| 11    | 0.27  | 0.27( <b>0.00</b> ) | 0.27( <b>0.00</b> ) | 0.27( <b>0.00</b> ) | 0.36  | 0.36( <b>0.00</b> ) | 0.35(-0.03)         | 0.36(0.02)          |
| 12    | 0.31  | 0.28(-0.10)         | 0.35(0.13)          | 0.34(-0.03)         | 0.57  | 0.57( <b>0.00</b> ) | 0.58(0.01)          | 0.58( <b>0.00</b> ) |
| 13    | 0.16  | 0.14(-0.11)         | 0.18(0.14)          | 0.16(-0.08)         | 0.32  | 0.29(-0.07)         | 0.35(0.11)          | 0.35( <b>0.00</b> ) |
| 14    | 0.35  | 0.35( <b>0.00</b> ) | 0.34(-0.04)         | 0.33(-0.01)         | 0.33  | 0.33( <b>0.00</b> ) | 0.33( <b>0.00</b> ) | 0.33( <b>0.00</b> ) |
| 15    | 0.20  | 0.19(-0.07)         | 0.20( <b>0.00</b> ) | 0.21(0.02)          | 0.60  | 0.59(-0.00)         | 0.60( <b>0.00</b> ) | 0.60( <b>0.00</b> ) |
| 16    | 0.23  | 0.21(-0.07)         | 0.25(0.11)          | 0.24(-0.04)         | 0.57  | 0.56(-0.02)         | 0.58(0.02)          | 0.58( <b>0.00</b> ) |
| 17    | 0.25  | 0.25( <b>0.00</b> ) | 0.24(-0.06)         | 0.24( <b>0.00</b> ) | 0.53  | 0.53( <b>0.00</b> ) | 0.52(-0.01)         | 0.53(0.01)          |
| 18    | 0.13  | 0.12(-0.03)         | 0.13( <b>0.00</b> ) | 0.13( <b>0.00</b> ) | 0.38  | 0.38( <b>0.00</b> ) | 0.37(-0.02)         | 0.38(0.02)          |
| 19    | 0.19  | 0.18(-0.01)         | 0.19( <b>0.00</b> ) | 0.19( <b>0.00</b> ) | 0.36  | 0.37(0.01)          | 0.36( <b>0.00</b> ) | 0.36( <b>0.00</b> ) |
| 20    | 0.41  | 0.39(-0.04)         | 0.42(0.02)          | 0.41(-0.01)         | 0.52  | 0.51(-0.01)         | 0.53(0.03)          | 0.52(-0.01)         |
| 21    | 0.52  | 0.52( <b>0.00</b> ) | 0.51(-0.03)         | 0.52(0.01)          | 0.41  | 0.39(-0.07)         | 0.45(0.09)          | 0.44(-0.04)         |
| 22    | 0.25  | 0.25( <b>0.00</b> ) | 0.23(-0.05)         | 0.24(0.03)          | 0.40  | 0.40( <b>0.00</b> ) | 0.40( <b>0.00</b> ) | 0.40( <b>0.00</b> ) |
| 23    | 0.13  | 0.13( <b>0.00</b> ) | 0.12(-0.06)         | 0.13(0.07)          | 0.30  | 0.29(-0.01)         | 0.30( <b>0.00</b> ) | 0.30( <b>0.00</b> ) |
| 24    | 0.29  | 0.30(0.04)          | 0.26(-0.10)         | 0.28(0.06)          | 0.50  | 0.49(-0.02)         | 0.50( <b>0.00</b> ) | 0.50( <b>0.00</b> ) |
| 25    | 0.29  | 0.27(-0.07)         | 0.31(0.06)          | 0.30(-0.01)         | 0.44  | 0.45(0.01)          | 0.42(-0.05)         | 0.43(0.03)          |
| Mean  | 0.30  | 0.29(-0.03)         | 0.30(0.00)          | 0.30(0.00)          | 0.42  | 0.41(-0.02)         | 0.43(0.01)          | 0.43(0.00)          |

<sup>a</sup> In parentheses is the gain in prediction accuracy with SG-UR over SG-SR; <sup>b</sup> In parentheses is the gain in prediction accuracy with UG-SR over SG-SR;

<sup>c</sup> In parentheses is the gain in prediction accuracy with UG-UR over UG-SR; Bold in parentheses indicates the number is not significant at  $\alpha = 0.05$ .

**Table S31 Accuracy of WP prediction for environment E1 with four ME GWP models in CV2**

| PopId | LL    |                      |                    |                      | LW    |                     |                    |                      |
|-------|-------|----------------------|--------------------|----------------------|-------|---------------------|--------------------|----------------------|
|       | SG-SR | SG-UR <sup>a</sup>   | UG-SR <sup>b</sup> | UG-UR <sup>c</sup>   | SG-SR | SG-UR <sup>a</sup>  | UG-SR <sup>b</sup> | UG-UR <sup>c</sup>   |
| 1     | 0.33  | 0.30(-0.08)          | 0.45(0.40)         | 0.45( <b>0.00</b> )  | 0.31  | 0.29(-0.07)         | 0.49(0.59)         | 0.49( <b>0.00</b> )  |
| 2     | 0.18  | 0.16(-0.08)          | 0.41(1.35)         | 0.42( <b>0.01</b> )  | 0.40  | 0.38(-0.04)         | 0.55(0.39)         | 0.55( <b>0.00</b> )  |
| 3     | 0.26  | 0.25(- <b>0.02</b> ) | 0.36(0.42)         | 0.37( <b>0.01</b> )  | 0.56  | 0.55(-0.02)         | 0.68(0.21)         | 0.68( <b>0.00</b> )  |
| 4     | 0.49  | 0.47(-0.03)          | 0.60(0.24)         | 0.60( <b>0.00</b> )  | 0.50  | 0.49(-0.02)         | 0.61(0.22)         | 0.61( <b>0.00</b> )  |
| 5     | 0.33  | 0.31(-0.06)          | 0.53(0.60)         | 0.54(0.01)           | 0.21  | 0.19(-0.08)         | 0.47(1.26)         | 0.46(-0.01)          |
| 6     | 0.50  | 0.49(-0.03)          | 0.59(0.18)         | 0.59( <b>0.00</b> )  | 0.31  | 0.30(-0.04)         | 0.43(0.40)         | 0.43( <b>0.00</b> )  |
| 7     | 0.52  | 0.51(-0.02)          | 0.67(0.30)         | 0.67( <b>0.00</b> )  | 0.48  | 0.47(-0.02)         | 0.61(0.28)         | 0.61( <b>0.00</b> )  |
| 8     | 0.28  | 0.28( <b>0.00</b> )  | 0.52(0.81)         | 0.51(- <b>0.01</b> ) | 0.30  | 0.27(-0.08)         | 0.49(0.64)         | 0.49( <b>0.00</b> )  |
| 9     | 0.35  | 0.33(-0.06)          | 0.50(0.43)         | 0.50( <b>0.00</b> )  | 0.18  | 0.16(-0.09)         | 0.42(1.37)         | 0.42( <b>0.00</b> )  |
| 10    | 0.46  | 0.47( <b>0.01</b> )  | 0.64(0.38)         | 0.64( <b>0.00</b> )  | 0.37  | 0.35(-0.04)         | 0.62(0.69)         | 0.62( <b>0.00</b> )  |
| 11    | 0.40  | 0.38(-0.04)          | 0.56(0.39)         | 0.56( <b>0.00</b> )  | 0.40  | 0.39(-0.01)         | 0.48(0.21)         | 0.48( <b>0.00</b> )  |
| 12    | 0.50  | 0.49(-0.02)          | 0.65(0.31)         | 0.65( <b>0.00</b> )  | 0.54  | 0.54( <b>0.00</b> ) | 0.64(0.18)         | 0.64( <b>0.00</b> )  |
| 13    | 0.45  | 0.45( <b>0.00</b> )  | 0.65(0.43)         | 0.64(- <b>0.01</b> ) | 0.49  | 0.48(-0.02)         | 0.62(0.26)         | 0.61(-0.01)          |
| 14    | 0.36  | 0.35(-0.03)          | 0.56(0.56)         | 0.55(-0.01)          | 0.44  | 0.44( <b>0.00</b> ) | 0.62(0.40)         | 0.62( <b>0.00</b> )  |
| 15    | 0.28  | 0.25(-0.11)          | 0.48(0.72)         | 0.47(-0.02)          | 0.30  | 0.29(-0.03)         | 0.44(0.45)         | 0.43(- <b>0.01</b> ) |
| 16    | 0.34  | 0.32(-0.05)          | 0.48(0.43)         | 0.48( <b>0.00</b> )  | 0.45  | 0.44(-0.02)         | 0.56(0.23)         | 0.56( <b>0.00</b> )  |
| 17    | 0.27  | 0.26(-0.03)          | 0.40(0.45)         | 0.39(- <b>0.01</b> ) | 0.55  | 0.55( <b>0.00</b> ) | 0.68(0.24)         | 0.68( <b>0.00</b> )  |
| 18    | 0.27  | 0.27( <b>0.00</b> )  | 0.36(0.31)         | 0.36( <b>0.00</b> )  | 0.40  | 0.40( <b>0.00</b> ) | 0.47(0.16)         | 0.47( <b>0.00</b> )  |
| 19    | 0.37  | 0.35(-0.06)          | 0.53(0.45)         | 0.52(-0.03)          | 0.41  | 0.40(-0.02)         | 0.58(0.42)         | 0.58( <b>0.00</b> )  |
| 20    | 0.47  | 0.45(-0.05)          | 0.61(0.30)         | 0.61( <b>0.00</b> )  | 0.48  | 0.48( <b>0.00</b> ) | 0.59(0.24)         | 0.60(0.01)           |
| 21    | 0.48  | 0.47(- <b>0.01</b> ) | 0.60(0.26)         | 0.61(0.01)           | 0.47  | 0.47( <b>0.00</b> ) | 0.53(0.14)         | 0.54(0.01)           |
| 22    | 0.36  | 0.34(-0.06)          | 0.51(0.42)         | 0.51( <b>0.00</b> )  | 0.31  | 0.30(-0.05)         | 0.47(0.52)         | 0.47( <b>0.00</b> )  |
| 23    | 0.44  | 0.42(-0.04)          | 0.55(0.25)         | 0.54(-0.01)          | 0.30  | 0.30( <b>0.00</b> ) | 0.54(0.80)         | 0.54( <b>0.00</b> )  |
| 24    | 0.48  | 0.47(-0.03)          | 0.58(0.21)         | 0.57(-0.02)          | 0.50  | 0.49(-0.02)         | 0.64(0.29)         | 0.64( <b>0.00</b> )  |
| 25    | 0.50  | 0.48(-0.03)          | 0.61(0.24)         | 0.61( <b>0.00</b> )  | 0.47  | 0.46(-0.01)         | 0.61(0.30)         | 0.60(-0.01)          |
| Mean  | 0.39  | 0.37(-0.04)          | 0.54(0.39)         | 0.53(-0.01)          | 0.41  | 0.39(-0.02)         | 0.55(0.36)         | 0.55(0.00)           |

<sup>a</sup> In parentheses is the gain in prediction accuracy with SG-UR over SG-SR; <sup>b</sup> In parentheses is the gain in prediction accuracy with UG-SR over SG-SR;

<sup>c</sup> In parentheses is the gain in prediction accuracy with UG-UR over UG-SR; Bold in parentheses indicates the number is not significant at  $\alpha = 0.05$ .

**Table S32 Accuracy of WP prediction for environment E2 with four ME GWP models in CV2**

| PopId | LL    |                     |                    |                      | LW    |                     |                    |                     |
|-------|-------|---------------------|--------------------|----------------------|-------|---------------------|--------------------|---------------------|
|       | SG-SR | SG-UR <sup>a</sup>  | UG-SR <sup>b</sup> | UG-UR <sup>c</sup>   | SG-SR | SG-UR <sup>a</sup>  | UG-SR <sup>b</sup> | UG-UR <sup>c</sup>  |
| 1     | 0.67  | 0.67( <b>0.00</b> ) | 0.74(0.11)         | 0.75( <b>0.00</b> )  | 0.46  | 0.45(-0.02)         | 0.57(0.25)         | 0.57( <b>0.00</b> ) |
| 2     | 0.40  | 0.39(-0.03)         | 0.57(0.42)         | 0.56(-0.02)          | 0.48  | 0.47(-0.02)         | 0.64(0.33)         | 0.64( <b>0.00</b> ) |
| 3     | 0.20  | 0.19(-0.05)         | 0.31(0.56)         | 0.30(- <b>0.01</b> ) | 0.60  | 0.59(-0.01)         | 0.70(0.17)         | 0.70( <b>0.00</b> ) |
| 4     | 0.56  | 0.56( <b>0.00</b> ) | 0.68(0.21)         | 0.68( <b>0.00</b> )  | 0.61  | 0.60(-0.01)         | 0.70(0.16)         | 0.70( <b>0.00</b> ) |
| 5     | 0.50  | 0.50( <b>0.00</b> ) | 0.64(0.28)         | 0.64( <b>0.00</b> )  | 0.46  | 0.44(-0.03)         | 0.65(0.43)         | 0.64(-0.02)         |
| 6     | 0.47  | 0.46(-0.03)         | 0.58(0.23)         | 0.58( <b>0.00</b> )  | 0.31  | 0.31( <b>0.00</b> ) | 0.36(0.17)         | 0.37(0.01)          |
| 7     | 0.41  | 0.39(-0.04)         | 0.62(0.53)         | 0.62( <b>0.00</b> )  | 0.59  | 0.57(-0.02)         | 0.72(0.22)         | 0.72( <b>0.00</b> ) |
| 8     | 0.34  | 0.31(-0.08)         | 0.53(0.55)         | 0.51(-0.03)          | 0.36  | 0.34(-0.06)         | 0.53(0.47)         | 0.53( <b>0.00</b> ) |
| 9     | 0.33  | 0.32(-0.04)         | 0.46(0.38)         | 0.46( <b>0.00</b> )  | 0.47  | 0.46(-0.02)         | 0.54(0.15)         | 0.54( <b>0.00</b> ) |
| 10    | 0.51  | 0.50(-0.02)         | 0.66(0.30)         | 0.65(-0.01)          | 0.36  | 0.32(-0.09)         | 0.47(0.32)         | 0.46(-0.01)         |
| 11    | 0.52  | 0.51(-0.02)         | 0.62(0.19)         | 0.62( <b>0.00</b> )  | 0.41  | 0.40(-0.01)         | 0.54(0.34)         | 0.54( <b>0.00</b> ) |
| 12    | 0.55  | 0.53(-0.03)         | 0.69(0.25)         | 0.68(-0.01)          | 0.58  | 0.57(-0.01)         | 0.65(0.13)         | 0.65( <b>0.00</b> ) |
| 13    | 0.39  | 0.37(-0.05)         | 0.66(0.67)         | 0.65(-0.01)          | 0.42  | 0.40(-0.06)         | 0.62(0.46)         | 0.60(-0.02)         |
| 14    | 0.42  | 0.41(-0.04)         | 0.60(0.41)         | 0.58(-0.03)          | 0.25  | 0.23(-0.07)         | 0.46(0.82)         | 0.45(-0.02)         |
| 15    | 0.48  | 0.48( <b>0.00</b> ) | 0.64(0.34)         | 0.65(0.01)           | 0.55  | 0.54(-0.01)         | 0.68(0.24)         | 0.67(-0.01)         |
| 16    | 0.33  | 0.31(-0.05)         | 0.47(0.43)         | 0.46(-0.01)          | 0.55  | 0.55( <b>0.00</b> ) | 0.64(0.16)         | 0.64( <b>0.00</b> ) |
| 17    | 0.12  | 0.10(-0.14)         | 0.29(1.44)         | 0.29( <b>0.00</b> )  | 0.61  | 0.61( <b>0.00</b> ) | 0.73(0.18)         | 0.73( <b>0.00</b> ) |
| 18    | 0.27  | 0.24(-0.10)         | 0.41(0.54)         | 0.40(-0.02)          | 0.31  | 0.30(-0.04)         | 0.50(0.60)         | 0.50( <b>0.00</b> ) |
| 19    | 0.27  | 0.24(-0.11)         | 0.41(0.51)         | 0.40(-0.03)          | 0.41  | 0.39(-0.03)         | 0.57(0.39)         | 0.57( <b>0.00</b> ) |
| 20    | 0.52  | 0.51(-0.02)         | 0.66(0.27)         | 0.66( <b>0.00</b> )  | 0.54  | 0.53(-0.01)         | 0.69(0.29)         | 0.69( <b>0.00</b> ) |
| 21    | 0.58  | 0.56(-0.02)         | 0.71(0.23)         | 0.70(-0.01)          | 0.33  | 0.33( <b>0.00</b> ) | 0.45(0.34)         | 0.44(-0.01)         |
| 22    | 0.50  | 0.49(-0.01)         | 0.61(0.21)         | 0.60(-0.01)          | 0.59  | 0.58(-0.01)         | 0.68(0.15)         | 0.68( <b>0.00</b> ) |
| 23    | 0.43  | 0.41(-0.04)         | 0.54(0.24)         | 0.53(-0.01)          | 0.37  | 0.37( <b>0.00</b> ) | 0.49(0.32)         | 0.49( <b>0.00</b> ) |
| 24    | 0.16  | 0.13(-0.17)         | 0.45(1.80)         | 0.44(-0.03)          | 0.45  | 0.44(-0.02)         | 0.63(0.39)         | 0.62(-0.01)         |
| 25    | 0.40  | 0.38(-0.05)         | 0.58(0.46)         | 0.57(-0.02)          | 0.48  | 0.48( <b>0.00</b> ) | 0.54(0.12)         | 0.54( <b>0.00</b> ) |
| Mean  | 0.41  | 0.40(-0.03)         | 0.56(0.35)         | 0.56(0.00)           | 0.46  | 0.45(-0.02)         | 0.59(0.27)         | 0.59(0.00)          |

<sup>a</sup> In parentheses is the gain in prediction accuracy with SG-UR over SG-SR; <sup>b</sup> In parentheses is the gain in prediction accuracy with UG-SR over SG-SR;

<sup>c</sup> In parentheses is the gain in prediction accuracy with UG-UR over UG-SR; Bold in parentheses indicates the number is not significant at  $\alpha = 0.05$ .

**Table S33 Accuracy of WP prediction for environment E3 with four ME GWP models in CV2**

| PopId | LL    |                    |                    |                     | LW    |                      |                    |                     |
|-------|-------|--------------------|--------------------|---------------------|-------|----------------------|--------------------|---------------------|
|       | SG-SR | SG-UR <sup>a</sup> | UG-SR <sup>b</sup> | UG-UR <sup>c</sup>  | SG-SR | SG-UR <sup>a</sup>   | UG-SR <sup>b</sup> | UG-UR <sup>c</sup>  |
| 1     | 0.51  | 0.50(-0.02)        | 0.65(0.27)         | 0.65( <b>0.00</b> ) | 0.36  | 0.35(-0.03)          | 0.45(0.25)         | 0.45( <b>0.00</b> ) |
| 2     | 0.36  | 0.34(-0.06)        | 0.52(0.46)         | 0.51(-0.03)         | 0.52  | 0.52( <b>0.00</b> )  | 0.65(0.23)         | 0.65( <b>0.00</b> ) |
| 3     | 0.23  | 0.22(-0.04)        | 0.35(0.48)         | 0.35( <b>0.00</b> ) | 0.26  | 0.25(-0.04)          | 0.46(0.75)         | 0.46( <b>0.00</b> ) |
| 4     | 0.51  | 0.49(-0.04)        | 0.61(0.19)         | 0.60(-0.01)         | 0.19  | 0.17(-0.10)          | 0.39(1.01)         | 0.38(-0.01)         |
| 5     | 0.46  | 0.44(-0.03)        | 0.60(0.32)         | 0.60( <b>0.00</b> ) | 0.30  | 0.28(-0.09)          | 0.53(0.76)         | 0.52(-0.02)         |
| 6     | 0.47  | 0.44(-0.06)        | 0.59(0.26)         | 0.59( <b>0.00</b> ) | 0.31  | 0.31( <b>0.00</b> )  | 0.43(0.37)         | 0.43( <b>0.00</b> ) |
| 7     | 0.49  | 0.48(-0.03)        | 0.64(0.30)         | 0.64( <b>0.00</b> ) | 0.42  | 0.41(-0.03)          | 0.59(0.41)         | 0.59( <b>0.00</b> ) |
| 8     | 0.32  | 0.31(-0.04)        | 0.50(0.54)         | 0.50( <b>0.00</b> ) | 0.46  | 0.44(-0.03)          | 0.54(0.18)         | 0.54( <b>0.00</b> ) |
| 9     | 0.42  | 0.40(-0.06)        | 0.54(0.28)         | 0.54( <b>0.00</b> ) | 0.45  | 0.44(-0.02)          | 0.57(0.26)         | 0.57( <b>0.00</b> ) |
| 10    | 0.42  | 0.40(-0.05)        | 0.62(0.47)         | 0.62( <b>0.00</b> ) | 0.55  | 0.54(-0.03)          | 0.63(0.14)         | 0.62(-0.01)         |
| 11    | 0.53  | 0.52(-0.02)        | 0.63(0.20)         | 0.63( <b>0.00</b> ) | 0.38  | 0.38( <b>0.00</b> )  | 0.52(0.37)         | 0.52( <b>0.00</b> ) |
| 12    | 0.42  | 0.39(-0.05)        | 0.56(0.34)         | 0.56( <b>0.00</b> ) | 0.27  | 0.26(-0.05)          | 0.41(0.51)         | 0.41( <b>0.00</b> ) |
| 13    | 0.43  | 0.39(-0.08)        | 0.64(0.50)         | 0.61(-0.04)         | 0.27  | 0.23(-0.13)          | 0.52(0.98)         | 0.51(-0.02)         |
| 14    | 0.33  | 0.31(-0.06)        | 0.48(0.46)         | 0.48( <b>0.00</b> ) | 0.33  | 0.31(-0.06)          | 0.53(0.59)         | 0.53( <b>0.00</b> ) |
| 15    | 0.25  | 0.22(-0.10)        | 0.46(0.83)         | 0.46( <b>0.00</b> ) | 0.39  | 0.39( <b>0.00</b> )  | 0.57(0.46)         | 0.57( <b>0.00</b> ) |
| 16    | 0.33  | 0.30(-0.07)        | 0.43(0.32)         | 0.43( <b>0.00</b> ) | 0.36  | 0.35(-0.02)          | 0.52(0.45)         | 0.52( <b>0.00</b> ) |
| 17    | 0.32  | 0.29(-0.07)        | 0.44(0.40)         | 0.44( <b>0.00</b> ) | 0.37  | 0.36(- <b>0.01</b> ) | 0.54(0.47)         | 0.54( <b>0.00</b> ) |
| 18    | 0.18  | 0.16(-0.11)        | 0.28(0.51)         | 0.28( <b>0.00</b> ) | 0.35  | 0.34(-0.02)          | 0.47(0.35)         | 0.47( <b>0.00</b> ) |
| 19    | 0.46  | 0.44(-0.05)        | 0.58(0.26)         | 0.57(-0.02)         | 0.41  | 0.40(-0.02)          | 0.54(0.31)         | 0.54( <b>0.00</b> ) |
| 20    | 0.32  | 0.29(-0.11)        | 0.50(0.56)         | 0.49(-0.01)         | 0.44  | 0.43(-0.02)          | 0.58(0.31)         | 0.58( <b>0.00</b> ) |
| 21    | 0.47  | 0.45(-0.03)        | 0.63(0.35)         | 0.63( <b>0.00</b> ) | 0.41  | 0.40(-0.01)          | 0.50(0.24)         | 0.50( <b>0.00</b> ) |
| 22    | 0.39  | 0.38(-0.02)        | 0.52(0.34)         | 0.51(-0.01)         | 0.34  | 0.33(-0.03)          | 0.52(0.53)         | 0.52( <b>0.00</b> ) |
| 23    | 0.31  | 0.28(-0.09)        | 0.50(0.60)         | 0.50( <b>0.00</b> ) | 0.40  | 0.40( <b>0.00</b> )  | 0.52(0.30)         | 0.52( <b>0.00</b> ) |
| 24    | 0.26  | 0.23(-0.11)        | 0.43(0.68)         | 0.41(-0.04)         | 0.41  | 0.39(-0.03)          | 0.56(0.38)         | 0.57(0.01)          |
| 25    | 0.36  | 0.32(-0.11)        | 0.52(0.44)         | 0.50(-0.04)         | 0.29  | 0.28(-0.03)          | 0.44(0.52)         | 0.44( <b>0.00</b> ) |
| Mean  | 0.38  | 0.36(-0.06)        | 0.53(0.38)         | 0.52(-0.01)         | 0.37  | 0.36(-0.03)          | 0.52(0.40)         | 0.52(0.00)          |

<sup>a</sup> In parentheses is the gain in prediction accuracy with SG-UR over SG-SR; <sup>b</sup> In parentheses is the gain in prediction accuracy with UG-SR over SG-SR;

<sup>c</sup> In parentheses is the gain in prediction accuracy with UG-UR over UG-SR; Bold in parentheses indicates the number is not significant at  $\alpha = 0.05$ .

**Table S34 Accuracy of WP prediction for environment E4 with four ME GWP models in CV2**

| PopId | LL    |                     |                    |                      | LW    |                     |                    |                     |
|-------|-------|---------------------|--------------------|----------------------|-------|---------------------|--------------------|---------------------|
|       | SG-SR | SG-UR <sup>a</sup>  | UG-SR <sup>b</sup> | UG-UR <sup>c</sup>   | SG-SR | SG-UR <sup>a</sup>  | UG-SR <sup>b</sup> | UG-UR <sup>c</sup>  |
| 1     | 0.46  | 0.45(-0.01)         | 0.61(0.33)         | 0.61( <b>0.00</b> )  | 0.51  | 0.50(-0.02)         | 0.63(0.23)         | 0.62(-0.01)         |
| 2     | 0.30  | 0.30( <b>0.00</b> ) | 0.53(0.77)         | 0.52(-0.02)          | 0.46  | 0.45(-0.02)         | 0.62(0.35)         | 0.62( <b>0.00</b> ) |
| 3     | 0.27  | 0.26(-0.03)         | 0.37(0.35)         | 0.36(- <b>0.01</b> ) | 0.41  | 0.40(-0.02)         | 0.62(0.52)         | 0.61(-0.01)         |
| 4     | 0.53  | 0.52(-0.02)         | 0.66(0.23)         | 0.65(-0.01)          | 0.52  | 0.51(-0.02)         | 0.64(0.23)         | 0.63(-0.01)         |
| 5     | 0.37  | 0.37( <b>0.00</b> ) | 0.55(0.47)         | 0.55( <b>0.00</b> )  | 0.44  | 0.43(-0.03)         | 0.63(0.43)         | 0.62(-0.02)         |
| 6     | 0.47  | 0.44(-0.06)         | 0.59(0.27)         | 0.59( <b>0.00</b> )  | 0.31  | 0.30(-0.02)         | 0.46(0.49)         | 0.46( <b>0.00</b> ) |
| 7     | 0.60  | 0.59(-0.01)         | 0.73(0.21)         | 0.73( <b>0.00</b> )  | 0.61  | 0.61( <b>0.00</b> ) | 0.72(0.18)         | 0.72( <b>0.00</b> ) |
| 8     | 0.37  | 0.35(-0.05)         | 0.59(0.60)         | 0.59( <b>0.00</b> )  | 0.40  | 0.37(-0.07)         | 0.56(0.42)         | 0.57(0.02)          |
| 9     | 0.33  | 0.31(-0.06)         | 0.49(0.47)         | 0.48(-0.01)          | 0.48  | 0.47(-0.02)         | 0.52(0.08)         | 0.51(-0.01)         |
| 10    | 0.42  | 0.41(-0.03)         | 0.58(0.39)         | 0.57(-0.01)          | 0.62  | 0.62( <b>0.00</b> ) | 0.73(0.17)         | 0.72(-0.01)         |
| 11    | 0.29  | 0.27(-0.08)         | 0.49(0.67)         | 0.49( <b>0.00</b> )  | 0.46  | 0.45(-0.01)         | 0.60(0.31)         | 0.60( <b>0.00</b> ) |
| 12    | 0.50  | 0.47(-0.05)         | 0.65(0.29)         | 0.64(-0.01)          | 0.57  | 0.56(-0.01)         | 0.66(0.17)         | 0.66( <b>0.00</b> ) |
| 13    | 0.24  | 0.19(-0.18)         | 0.52(1.21)         | 0.54(0.02)           | 0.42  | 0.39(-0.06)         | 0.60(0.44)         | 0.60( <b>0.00</b> ) |
| 14    | 0.35  | 0.32(-0.07)         | 0.54(0.55)         | 0.53(-0.03)          | 0.44  | 0.43(-0.02)         | 0.63(0.44)         | 0.63( <b>0.00</b> ) |
| 15    | 0.37  | 0.35(-0.04)         | 0.58(0.57)         | 0.57(-0.01)          | 0.54  | 0.53(-0.01)         | 0.68(0.26)         | 0.68( <b>0.00</b> ) |
| 16    | 0.21  | 0.19(-0.09)         | 0.42(0.99)         | 0.42( <b>0.00</b> )  | 0.54  | 0.53(-0.00)         | 0.66(0.23)         | 0.66( <b>0.00</b> ) |
| 17    | 0.35  | 0.34(-0.03)         | 0.49(0.38)         | 0.48(-0.02)          | 0.56  | 0.56( <b>0.00</b> ) | 0.70(0.25)         | 0.70( <b>0.00</b> ) |
| 18    | 0.26  | 0.24(-0.08)         | 0.37(0.40)         | 0.37( <b>0.00</b> )  | 0.33  | 0.32(-0.02)         | 0.45(0.39)         | 0.45( <b>0.00</b> ) |
| 19    | 0.28  | 0.25(-0.11)         | 0.45(0.61)         | 0.45( <b>0.00</b> )  | 0.50  | 0.48(-0.03)         | 0.66(0.31)         | 0.66( <b>0.00</b> ) |
| 20    | 0.47  | 0.46(-0.03)         | 0.60(0.27)         | 0.59(-0.01)          | 0.53  | 0.54(0.01)          | 0.66(0.25)         | 0.67(0.01)          |
| 21    | 0.61  | 0.60(-0.02)         | 0.69(0.13)         | 0.69( <b>0.00</b> )  | 0.36  | 0.36( <b>0.00</b> ) | 0.49(0.35)         | 0.49( <b>0.00</b> ) |
| 22    | 0.46  | 0.46( <b>0.00</b> ) | 0.55(0.18)         | 0.55( <b>0.00</b> )  | 0.54  | 0.53(-0.02)         | 0.67(0.26)         | 0.67( <b>0.00</b> ) |
| 23    | 0.39  | 0.37(-0.05)         | 0.50(0.28)         | 0.50( <b>0.00</b> )  | 0.48  | 0.48( <b>0.00</b> ) | 0.60(0.25)         | 0.60( <b>0.00</b> ) |
| 24    | 0.23  | 0.20(-0.14)         | 0.43(0.87)         | 0.41(-0.04)          | 0.46  | 0.45(-0.02)         | 0.62(0.35)         | 0.62( <b>0.00</b> ) |
| 25    | 0.24  | 0.21(-0.14)         | 0.46(0.87)         | 0.45(-0.02)          | 0.49  | 0.48(-0.02)         | 0.54(0.11)         | 0.54( <b>0.00</b> ) |
| Mean  | 0.38  | 0.36(-0.05)         | 0.54(0.43)         | 0.53(-0.01)          | 0.48  | 0.47(-0.02)         | 0.61(0.28)         | 0.61(0.00)          |

<sup>a</sup> In parentheses is the gain in prediction accuracy with SG-UR over SG-SR; <sup>b</sup> In parentheses is the gain in prediction accuracy with UG-SR over SG-SR;

<sup>c</sup> In parentheses is the gain in prediction accuracy with UG-UR over UG-SR; Bold in parentheses indicates the number is not significant at  $\alpha = 0.05$ .

**Table S35 Accuracy of AP prediction for environment E1 with four ME GWP models in CV2**

| PopId | LL    |                    |                    |                    | LW    |                    |                    |                    |
|-------|-------|--------------------|--------------------|--------------------|-------|--------------------|--------------------|--------------------|
|       | SG-SR | SG-UR <sup>a</sup> | UG-SR <sup>b</sup> | UG-UR <sup>c</sup> | SG-SR | SG-UR <sup>a</sup> | UG-SR <sup>b</sup> | UG-UR <sup>c</sup> |
| 1     | 0.31  | 0.30(-0.01)        | 0.36(0.16)         | 0.35(-0.01)        | 0.27  | 0.26(-0.01)        | 0.30(0.14)         | 0.30(0.00)         |
| 2     | 0.17  | 0.16(-0.05)        | 0.23(0.36)         | 0.22(-0.04)        | 0.41  | 0.42(0.01)         | 0.44(0.06)         | 0.44(0.00)         |
| 3     | 0.25  | 0.26(0.05)         | 0.27(0.09)         | 0.28(0.03)         | 0.55  | 0.54(-0.01)        | 0.59(0.07)         | 0.59(0.00)         |
| 4     | 0.45  | 0.46(0.02)         | 0.46(0.03)         | 0.48(0.03)         | 0.33  | 0.34(0.03)         | 0.33(0.00)         | 0.33(0.00)         |
| 5     | 0.26  | 0.27(0.07)         | 0.27(0.06)         | 0.28(0.04)         | 0.24  | 0.24(0.00)         | 0.28(0.18)         | 0.28(0.00)         |
| 6     | 0.47  | 0.47(0.00)         | 0.50(0.06)         | 0.51(0.01)         | 0.38  | 0.38(0.00)         | 0.41(0.07)         | 0.41(0.00)         |
| 7     | 0.29  | 0.28(-0.03)        | 0.37(0.25)         | 0.36(-0.02)        | 0.37  | 0.37(0.00)         | 0.45(0.22)         | 0.44(-0.02)        |
| 8     | 0.44  | 0.44(0.00)         | 0.49(0.10)         | 0.49(0.00)         | 0.37  | 0.37(0.00)         | 0.40(0.08)         | 0.40(0.00)         |
| 9     | 0.35  | 0.34(-0.01)        | 0.39(0.12)         | 0.39(0.00)         | 0.16  | 0.17(0.02)         | 0.18(0.11)         | 0.18(0.00)         |
| 10    | 0.39  | 0.39(0.00)         | 0.44(0.12)         | 0.44(0.00)         | 0.44  | 0.43(-0.01)        | 0.50(0.15)         | 0.50(0.00)         |
| 11    | 0.14  | 0.14(0.00)         | 0.20(0.43)         | 0.20(0.00)         | 0.21  | 0.21(0.00)         | 0.24(0.13)         | 0.24(0.00)         |
| 12    | 0.40  | 0.40(0.00)         | 0.46(0.14)         | 0.46(0.00)         | 0.57  | 0.56(-0.01)        | 0.60(0.06)         | 0.60(0.00)         |
| 13    | 0.28  | 0.27(-0.04)        | 0.39(0.36)         | 0.38(-0.02)        | 0.40  | 0.40(0.00)         | 0.44(0.11)         | 0.44(0.00)         |
| 14    | 0.40  | 0.41(0.01)         | 0.44(0.08)         | 0.44(0.00)         | 0.36  | 0.36(0.00)         | 0.42(0.17)         | 0.42(0.00)         |
| 15    | 0.25  | 0.27(0.04)         | 0.27(0.05)         | 0.27(0.00)         | 0.33  | 0.33(0.00)         | 0.34(0.05)         | 0.34(0.00)         |
| 16    | 0.30  | 0.30(0.00)         | 0.34(0.11)         | 0.34(0.00)         | 0.51  | 0.51(0.00)         | 0.53(0.04)         | 0.53(0.00)         |
| 17    | 0.29  | 0.29(0.00)         | 0.33(0.13)         | 0.33(0.00)         | 0.46  | 0.45(-0.01)        | 0.50(0.11)         | 0.51(0.00)         |
| 18    | 0.15  | 0.16(0.05)         | 0.16(0.07)         | 0.17(0.04)         | 0.30  | 0.30(0.00)         | 0.34(0.13)         | 0.33(-0.02)        |
| 19    | 0.32  | 0.32(0.00)         | 0.37(0.14)         | 0.37(0.00)         | 0.26  | 0.26(0.00)         | 0.29(0.15)         | 0.29(0.00)         |
| 20    | 0.42  | 0.41(-0.01)        | 0.45(0.07)         | 0.45(0.00)         | 0.44  | 0.44(0.00)         | 0.47(0.07)         | 0.47(0.00)         |
| 21    | 0.33  | 0.32(-0.04)        | 0.40(0.22)         | 0.39(-0.02)        | 0.32  | 0.31(-0.02)        | 0.36(0.13)         | 0.35(-0.02)        |
| 22    | 0.34  | 0.35(0.03)         | 0.36(0.05)         | 0.36(0.00)         | 0.31  | 0.31(0.00)         | 0.34(0.10)         | 0.34(0.00)         |
| 23    | 0.22  | 0.23(0.03)         | 0.25(0.12)         | 0.25(0.00)         | 0.17  | 0.16(-0.05)        | 0.25(0.47)         | 0.24(-0.03)        |
| 24    | 0.32  | 0.33(0.06)         | 0.31(-0.02)        | 0.32(0.04)         | 0.47  | 0.48(0.01)         | 0.50(0.05)         | 0.50(0.00)         |
| 25    | 0.43  | 0.44(0.01)         | 0.44(0.03)         | 0.46(0.03)         | 0.48  | 0.47(-0.01)        | 0.51(0.07)         | 0.51(0.00)         |
| Mean  | 0.32  | 0.32(0.00)         | 0.36(0.12)         | 0.36(0.00)         | 0.36  | 0.36(0.00)         | 0.40(0.10)         | 0.40(0.00)         |

<sup>a</sup> In parentheses is the gain in prediction accuracy with SG-UR over SG-SR; <sup>b</sup> In parentheses is the gain in prediction accuracy with UG-SR over SG-SR;

<sup>c</sup> In parentheses is the gain in prediction accuracy with UG-UR over UG-SR; Bold in parentheses indicates the number is not significant at  $\alpha = 0.05$ .

**Table S36 Accuracy of AP prediction for environment E2 with four ME GWP models in CV2**

| PopId | LL    |                      |                    |                     | LW    |                     |                     |                     |
|-------|-------|----------------------|--------------------|---------------------|-------|---------------------|---------------------|---------------------|
|       | SG-SR | SG-UR <sup>a</sup>   | UG-SR <sup>b</sup> | UG-UR <sup>c</sup>  | SG-SR | SG-UR <sup>a</sup>  | UG-SR <sup>b</sup>  | UG-UR <sup>c</sup>  |
| 1     | 0.45  | 0.46(0.02)           | 0.46(0.02)         | 0.47(0.02)          | 0.25  | 0.24(-0.02)         | 0.30(0.21)          | 0.30( <b>0.00</b> ) |
| 2     | 0.30  | 0.29(-0.03)          | 0.36(0.20)         | 0.36( <b>0.00</b> ) | 0.45  | 0.45( <b>0.00</b> ) | 0.50(0.11)          | 0.50( <b>0.00</b> ) |
| 3     | 0.30  | 0.31(0.04)           | 0.31(0.06)         | 0.32(0.02)          | 0.56  | 0.56( <b>0.00</b> ) | 0.60(0.06)          | 0.60( <b>0.00</b> ) |
| 4     | 0.42  | 0.42( <b>0.00</b> )  | 0.46(0.09)         | 0.46( <b>0.00</b> ) | 0.38  | 0.38( <b>0.00</b> ) | 0.42(0.12)          | 0.42( <b>0.00</b> ) |
| 5     | 0.33  | 0.34(0.03)           | 0.36(0.09)         | 0.37(0.02)          | 0.47  | 0.46(-0.01)         | 0.52(0.11)          | 0.52( <b>0.00</b> ) |
| 6     | 0.46  | 0.47(0.01)           | 0.48(0.04)         | 0.49(0.01)          | 0.28  | 0.28( <b>0.00</b> ) | 0.30(0.10)          | 0.30( <b>0.00</b> ) |
| 7     | 0.23  | 0.23( <b>0.00</b> )  | 0.28(0.21)         | 0.28( <b>0.00</b> ) | 0.60  | 0.60( <b>0.00</b> ) | 0.61(0.02)          | 0.62(0.02)          |
| 8     | 0.27  | 0.26(-0.02)          | 0.32(0.18)         | 0.32( <b>0.00</b> ) | 0.36  | 0.36( <b>0.00</b> ) | 0.38(0.07)          | 0.38( <b>0.00</b> ) |
| 9     | 0.21  | 0.22(0.03)           | 0.23(0.11)         | 0.24( <b>0.01</b> ) | 0.36  | 0.36( <b>0.00</b> ) | 0.40(0.11)          | 0.39(-0.01)         |
| 10    | 0.49  | 0.48(- <b>0.01</b> ) | 0.51(0.06)         | 0.52(0.01)          | 0.42  | 0.41(-0.02)         | 0.48(0.15)          | 0.48( <b>0.00</b> ) |
| 11    | 0.34  | 0.33(-0.02)          | 0.39(0.15)         | 0.39( <b>0.00</b> ) | 0.37  | 0.38(0.01)          | 0.40(0.08)          | 0.40( <b>0.00</b> ) |
| 12    | 0.42  | 0.42( <b>0.00</b> )  | 0.46(0.09)         | 0.46( <b>0.00</b> ) | 0.60  | 0.60(-0.01)         | 0.63(0.04)          | 0.63( <b>0.00</b> ) |
| 13    | 0.36  | 0.37(0.03)           | 0.39(0.07)         | 0.40(0.03)          | 0.41  | 0.42(0.01)          | 0.43(0.05)          | 0.44(0.01)          |
| 14    | 0.27  | 0.26(-0.03)          | 0.33(0.24)         | 0.33( <b>0.00</b> ) | 0.38  | 0.37(-0.02)         | 0.42(0.11)          | 0.41(-0.01)         |
| 15    | 0.33  | 0.35(0.06)           | 0.35(0.07)         | 0.37(0.05)          | 0.54  | 0.54( <b>0.00</b> ) | 0.55(0.02)          | 0.55( <b>0.00</b> ) |
| 16    | 0.41  | 0.41( <b>0.00</b> )  | 0.44(0.07)         | 0.45(0.02)          | 0.54  | 0.54( <b>0.00</b> ) | 0.56(0.03)          | 0.56( <b>0.00</b> ) |
| 17    | 0.10  | 0.10( <b>0.00</b> )  | 0.14(0.42)         | 0.14( <b>0.00</b> ) | 0.61  | 0.61( <b>0.00</b> ) | 0.61( <b>0.00</b> ) | 0.62(0.01)          |
| 18    | 0.20  | 0.21(0.05)           | 0.21(0.05)         | 0.22(0.05)          | 0.26  | 0.26( <b>0.00</b> ) | 0.27(0.03)          | 0.27( <b>0.00</b> ) |
| 19    | 0.40  | 0.39(-0.02)          | 0.43(0.09)         | 0.43( <b>0.00</b> ) | 0.42  | 0.43(0.02)          | 0.43(0.03)          | 0.44(0.01)          |
| 20    | 0.42  | 0.42( <b>0.00</b> )  | 0.44(0.05)         | 0.44( <b>0.00</b> ) | 0.44  | 0.45(0.01)          | 0.46(0.03)          | 0.46( <b>0.00</b> ) |
| 21    | 0.48  | 0.47(-0.01)          | 0.51(0.07)         | 0.51( <b>0.00</b> ) | 0.44  | 0.44( <b>0.00</b> ) | 0.45(0.03)          | 0.45( <b>0.00</b> ) |
| 22    | 0.44  | 0.44( <b>0.00</b> )  | 0.47(0.08)         | 0.47( <b>0.00</b> ) | 0.43  | 0.44(0.01)          | 0.46(0.06)          | 0.47(0.01)          |
| 23    | 0.36  | 0.37(0.02)           | 0.38(0.05)         | 0.39(0.02)          | 0.39  | 0.39( <b>0.00</b> ) | 0.42(0.08)          | 0.42( <b>0.00</b> ) |
| 24    | 0.21  | 0.21( <b>0.00</b> )  | 0.25(0.22)         | 0.25( <b>0.00</b> ) | 0.49  | 0.49( <b>0.00</b> ) | 0.50(0.03)          | 0.51(0.02)          |
| 25    | 0.27  | 0.27( <b>0.00</b> )  | 0.31(0.18)         | 0.31( <b>0.00</b> ) | 0.37  | 0.36(-0.01)         | 0.43(0.16)          | 0.42(-0.01)         |
| Mean  | 0.34  | 0.34(0.00)           | 0.37(0.10)         | 0.37(0.00)          | 0.43  | 0.42(-0.01)         | 0.46(0.07)          | 0.46(0.00)          |

<sup>a</sup> In parentheses is the gain in prediction accuracy with SG-UR over SG-SR; <sup>b</sup> In parentheses is the gain in prediction accuracy with UG-SR over SG-SR;

<sup>c</sup> In parentheses is the gain in prediction accuracy with UG-UR over UG-SR; Bold in parentheses indicates the number is not significant at  $\alpha = 0.05$ .



**Table S37 Accuracy of AP prediction for environment E3 with four ME GWP models in CV2**

| PopId | LL    |                      |                     |                     | LW    |                     |                     |                     |
|-------|-------|----------------------|---------------------|---------------------|-------|---------------------|---------------------|---------------------|
|       | SG-SR | SG-UR <sup>a</sup>   | UG-SR <sup>b</sup>  | UG-UR <sup>c</sup>  | SG-SR | SG-UR <sup>a</sup>  | UG-SR <sup>b</sup>  | UG-UR <sup>c</sup>  |
| 1     | 0.41  | 0.41( <b>0.00</b> )  | 0.45(0.11)          | 0.45( <b>0.00</b> ) | 0.23  | 0.23( <b>0.00</b> ) | 0.27(0.15)          | 0.27( <b>0.00</b> ) |
| 2     | 0.29  | 0.28(-0.03)          | 0.36(0.22)          | 0.35(-0.01)         | 0.47  | 0.47( <b>0.00</b> ) | 0.52(0.10)          | 0.52( <b>0.00</b> ) |
| 3     | 0.21  | 0.22(0.04)           | 0.22(0.05)          | 0.23(0.02)          | 0.36  | 0.36( <b>0.00</b> ) | 0.38(0.05)          | 0.38( <b>0.00</b> ) |
| 4     | 0.44  | 0.45(0.02)           | 0.45(0.03)          | 0.46(0.02)          | 0.22  | 0.22( <b>0.00</b> ) | 0.25(0.16)          | 0.26(0.01)          |
| 5     | 0.22  | 0.22( <b>0.00</b> )  | 0.27(0.23)          | 0.27( <b>0.00</b> ) | 0.44  | 0.44( <b>0.00</b> ) | 0.46(0.04)          | 0.46( <b>0.00</b> ) |
| 6     | 0.48  | 0.49( <b>0.01</b> )  | 0.50(0.03)          | 0.50( <b>0.00</b> ) | 0.26  | 0.25(-0.01)         | 0.27(0.07)          | 0.27( <b>0.00</b> ) |
| 7     | 0.25  | 0.25( <b>0.00</b> )  | 0.27(0.07)          | 0.28(0.03)          | 0.32  | 0.32( <b>0.00</b> ) | 0.38(0.17)          | 0.37(-0.02)         |
| 8     | 0.28  | 0.28( <b>0.00</b> )  | 0.32(0.13)          | 0.32( <b>0.00</b> ) | 0.29  | 0.29( <b>0.00</b> ) | 0.31(0.08)          | 0.31( <b>0.00</b> ) |
| 9     | 0.36  | 0.37(0.01)           | 0.39(0.07)          | 0.39( <b>0.00</b> ) | 0.33  | 0.33( <b>0.00</b> ) | 0.34(0.03)          | 0.34( <b>0.00</b> ) |
| 10    | 0.48  | 0.48( <b>0.00</b> )  | 0.50(0.04)          | 0.51(0.01)          | 0.55  | 0.56(0.01)          | 0.57(0.03)          | 0.57( <b>0.00</b> ) |
| 11    | 0.27  | 0.27( <b>0.00</b> )  | 0.31(0.16)          | 0.31( <b>0.00</b> ) | 0.27  | 0.27( <b>0.00</b> ) | 0.31(0.14)          | 0.31( <b>0.00</b> ) |
| 12    | 0.32  | 0.32( <b>0.00</b> )  | 0.34(0.07)          | 0.35(0.01)          | 0.32  | 0.33(0.02)          | 0.32( <b>0.00</b> ) | 0.33(0.01)          |
| 13    | 0.38  | 0.37(-0.02)          | 0.47(0.24)          | 0.46(-0.02)         | 0.40  | 0.41(0.02)          | 0.41( <b>0.00</b> ) | 0.42(0.02)          |
| 14    | 0.26  | 0.26( <b>0.00</b> )  | 0.29(0.14)          | 0.30( <b>0.01</b> ) | 0.26  | 0.26( <b>0.00</b> ) | 0.33(0.23)          | 0.32(-0.02)         |
| 15    | 0.25  | 0.25( <b>0.00</b> )  | 0.31(0.24)          | 0.31( <b>0.00</b> ) | 0.49  | 0.48(-0.00)         | 0.52(0.06)          | 0.52( <b>0.00</b> ) |
| 16    | 0.20  | 0.19(- <b>0.02</b> ) | 0.24(0.20)          | 0.24( <b>0.00</b> ) | 0.46  | 0.45(-0.02)         | 0.52(0.14)          | 0.52( <b>0.00</b> ) |
| 17    | 0.29  | 0.28(-0.01)          | 0.31(0.07)          | 0.31( <b>0.00</b> ) | 0.31  | 0.30(-0.03)         | 0.38(0.22)          | 0.37(-0.01)         |
| 18    | 0.11  | 0.10(-0.09)          | 0.16(0.47)          | 0.15(-0.06)         | 0.37  | 0.36(-0.01)         | 0.38(0.05)          | 0.39(0.01)          |
| 19    | 0.39  | 0.40(0.01)           | 0.41(0.06)          | 0.42(0.02)          | 0.30  | 0.30( <b>0.00</b> ) | 0.34(0.13)          | 0.34( <b>0.00</b> ) |
| 20    | 0.35  | 0.34(-0.02)          | 0.39(0.13)          | 0.39( <b>0.00</b> ) | 0.46  | 0.46( <b>0.00</b> ) | 0.50(0.08)          | 0.50( <b>0.00</b> ) |
| 21    | 0.46  | 0.45(-0.02)          | 0.52(0.13)          | 0.52( <b>0.00</b> ) | 0.42  | 0.42( <b>0.00</b> ) | 0.45(0.08)          | 0.45( <b>0.00</b> ) |
| 22    | 0.21  | 0.20(-0.04)          | 0.27(0.28)          | 0.26(-0.02)         | 0.27  | 0.27( <b>0.00</b> ) | 0.31(0.15)          | 0.31( <b>0.00</b> ) |
| 23    | 0.23  | 0.23( <b>0.00</b> )  | 0.27(0.17)          | 0.27( <b>0.00</b> ) | 0.29  | 0.29( <b>0.00</b> ) | 0.33(0.14)          | 0.33( <b>0.00</b> ) |
| 24    | 0.20  | 0.20( <b>0.00</b> )  | 0.22(0.13)          | 0.23(0.02)          | 0.39  | 0.38(-0.01)         | 0.44(0.13)          | 0.43(-0.01)         |
| 25    | 0.38  | 0.39(0.03)           | 0.38( <b>0.00</b> ) | 0.39(0.03)          | 0.26  | 0.26( <b>0.00</b> ) | 0.27(0.05)          | 0.28(0.02)          |
| Mean  | 0.31  | 0.31(0.00)           | 0.35(0.12)          | 0.35(0.00)          | 0.35  | 0.35(0.00)          | 0.38(0.09)          | 0.38(0.00)          |

<sup>a</sup> In parentheses is the gain in prediction accuracy with SG-UR over SG-SR; <sup>b</sup> In parentheses is the gain in prediction accuracy with UG-SR over SG-SR;

<sup>c</sup> In parentheses is the gain in prediction accuracy with UG-UR over UG-SR; Bold in parentheses indicates the number is not significant at  $\alpha = 0.05$ .

**Table S38 Accuracy of AP prediction for environment E4 with four ME GWP models in CV2**

| PopId | LL    |                     |                     |                     | LW    |                      |                    |                      |
|-------|-------|---------------------|---------------------|---------------------|-------|----------------------|--------------------|----------------------|
|       | SG-SR | SG-UR <sup>a</sup>  | UG-SR <sup>b</sup>  | UG-UR <sup>c</sup>  | SG-SR | SG-UR <sup>a</sup>   | UG-SR <sup>b</sup> | UG-UR <sup>c</sup>   |
| 1     | 0.30  | 0.31(0.02)          | 0.35(0.16)          | 0.36(0.01)          | 0.34  | 0.34( <b>0.00</b> )  | 0.37(0.10)         | 0.37( <b>0.00</b> )  |
| 2     | 0.25  | 0.26(0.02)          | 0.28(0.11)          | 0.28( <b>0.00</b> ) | 0.44  | 0.44( <b>0.00</b> )  | 0.47(0.08)         | 0.47( <b>0.00</b> )  |
| 3     | 0.26  | 0.26( <b>0.00</b> ) | 0.29(0.14)          | 0.30(0.01)          | 0.40  | 0.41( <b>0.00</b> )  | 0.44(0.09)         | 0.44( <b>0.00</b> )  |
| 4     | 0.45  | 0.45( <b>0.00</b> ) | 0.50(0.11)          | 0.50( <b>0.00</b> ) | 0.31  | 0.31( <b>0.00</b> )  | 0.34(0.11)         | 0.34( <b>0.00</b> )  |
| 5     | 0.39  | 0.40(0.01)          | 0.42(0.06)          | 0.42( <b>0.00</b> ) | 0.35  | 0.35( <b>0.00</b> )  | 0.41(0.17)         | 0.40(-0.01)          |
| 6     | 0.46  | 0.46( <b>0.00</b> ) | 0.52(0.13)          | 0.52( <b>0.00</b> ) | 0.36  | 0.35(- <b>0.01</b> ) | 0.37(0.05)         | 0.37( <b>0.00</b> )  |
| 7     | 0.36  | 0.37(0.02)          | 0.38(0.05)          | 0.39(0.03)          | 0.53  | 0.54(0.01)           | 0.57(0.07)         | 0.57( <b>0.00</b> )  |
| 8     | 0.35  | 0.35( <b>0.00</b> ) | 0.41(0.15)          | 0.40(-0.01)         | 0.40  | 0.40( <b>0.00</b> )  | 0.43(0.08)         | 0.44( <b>0.01</b> )  |
| 9     | 0.34  | 0.35(0.02)          | 0.36(0.05)          | 0.37(0.03)          | 0.42  | 0.42( <b>0.00</b> )  | 0.47(0.11)         | 0.46(- <b>0.01</b> ) |
| 10    | 0.46  | 0.45(-0.02)         | 0.50(0.09)          | 0.51(0.02)          | 0.55  | 0.55( <b>0.00</b> )  | 0.58(0.06)         | 0.58( <b>0.00</b> )  |
| 11    | 0.27  | 0.27( <b>0.00</b> ) | 0.31(0.15)          | 0.32(0.01)          | 0.37  | 0.37( <b>0.00</b> )  | 0.38(0.03)         | 0.38( <b>0.00</b> )  |
| 12    | 0.34  | 0.32(-0.05)         | 0.42(0.25)          | 0.41(-0.02)         | 0.58  | 0.58( <b>0.00</b> )  | 0.60(0.04)         | 0.60( <b>0.00</b> )  |
| 13    | 0.16  | 0.16( <b>0.00</b> ) | 0.22(0.37)          | 0.21(-0.03)         | 0.32  | 0.31(-0.04)          | 0.39(0.20)         | 0.38(-0.01)          |
| 14    | 0.35  | 0.36(0.02)          | 0.38(0.09)          | 0.38( <b>0.00</b> ) | 0.35  | 0.35( <b>0.00</b> )  | 0.38(0.10)         | 0.38( <b>0.00</b> )  |
| 15    | 0.25  | 0.25( <b>0.00</b> ) | 0.29(0.19)          | 0.30(0.02)          | 0.61  | 0.60(- <b>0.01</b> ) | 0.63(0.05)         | 0.63( <b>0.00</b> )  |
| 16    | 0.25  | 0.25( <b>0.00</b> ) | 0.30(0.21)          | 0.30( <b>0.00</b> ) | 0.58  | 0.57(- <b>0.01</b> ) | 0.60(0.04)         | 0.60( <b>0.00</b> )  |
| 17    | 0.25  | 0.25( <b>0.00</b> ) | 0.27(0.09)          | 0.27( <b>0.00</b> ) | 0.55  | 0.56(0.01)           | 0.57(0.03)         | 0.57( <b>0.00</b> )  |
| 18    | 0.16  | 0.16( <b>0.00</b> ) | 0.18(0.12)          | 0.18( <b>0.00</b> ) | 0.41  | 0.40(- <b>0.01</b> ) | 0.41(0.02)         | 0.42(0.01)           |
| 19    | 0.21  | 0.21( <b>0.00</b> ) | 0.24(0.18)          | 0.25(0.01)          | 0.38  | 0.38( <b>0.00</b> )  | 0.40(0.08)         | 0.41(0.01)           |
| 20    | 0.42  | 0.42( <b>0.00</b> ) | 0.46(0.08)          | 0.46( <b>0.00</b> ) | 0.52  | 0.52( <b>0.00</b> )  | 0.56(0.07)         | 0.56( <b>0.00</b> )  |
| 21    | 0.52  | 0.53(0.01)          | 0.54(0.03)          | 0.55(0.01)          | 0.41  | 0.39(-0.03)          | 0.46(0.14)         | 0.45(-0.02)          |
| 22    | 0.29  | 0.30(0.04)          | 0.30(0.05)          | 0.31(0.03)          | 0.42  | 0.43(0.02)           | 0.45(0.06)         | 0.45( <b>0.00</b> )  |
| 23    | 0.14  | 0.15(0.04)          | 0.17(0.19)          | 0.17( <b>0.00</b> ) | 0.32  | 0.32( <b>0.00</b> )  | 0.35(0.08)         | 0.35( <b>0.00</b> )  |
| 24    | 0.28  | 0.29(0.04)          | 0.28( <b>0.00</b> ) | 0.29(0.04)          | 0.50  | 0.50( <b>0.00</b> )  | 0.52(0.05)         | 0.52( <b>0.00</b> )  |
| 25    | 0.28  | 0.27(-0.04)         | 0.34(0.21)          | 0.33(-0.01)         | 0.42  | 0.43(0.02)           | 0.43(0.02)         | 0.44(0.02)           |
| Mean  | 0.31  | 0.31(0.00)          | 0.35(0.12)          | 0.35(0.00)          | 0.43  | 0.43(0.00)           | 0.46(0.07)         | 0.46(0.00)           |

<sup>a</sup> In parentheses is the gain in prediction accuracy with SG-UR over SG-SR; <sup>b</sup> In parentheses is the gain in prediction accuracy with UG-SR over SG-SR;

<sup>c</sup> In parentheses is the gain in prediction accuracy with UG-UR over UG-SR; Bold in parentheses indicates the number is not significant at  $\alpha = 0.05$ .
