# Supplementary material for: Accuracy of Across-Environment Genome-Wide Prediction in Maize Nested Association Mapping Populations
Source: PubMed Central journal article supplement (PMC3564986; doi:10.1534/g3.112.005066), 2013-02-01
Supplement: supp_3.2.263_TableS1.pdf [file supp_3.2.263_TableS1.pdf]

**Table S1 Variance components for traits LL and LW based on 25 NAM populations**

| PopId | LL      |         |                |                |               |               |       | LW    |       |              |              |             |             |       |
|-------|---------|---------|----------------|----------------|---------------|---------------|-------|-------|-------|--------------|--------------|-------------|-------------|-------|
|       | $V_G$   | $V_E$   | $V_L$          | $V_Y$          | $V_{GL}$      | $V_{GY}$      | $H^2$ | $V_G$ | $V_E$ | $V_L$        | $V_Y$        | $V_{GL}$    | $V_{GY}$    | $H^2$ |
| 1     | 3712.69 | 3415.65 | <b>24.84</b>   | <b>5.32</b>    | <b>0.00</b>   | 570.36        | 0.77  | 49.15 | 85.97 | <b>12.87</b> | <b>0.00</b>  | <b>0.00</b> | <b>0.12</b> | 0.70  |
| 2     | 2828.92 | 3184.92 | <b>229.33</b>  | <b>0.00</b>    | <b>0.00</b>   | <b>0.00</b>   | 0.78  | 86.33 | 84.06 | <b>0.95</b>  | <b>1.57</b>  | <b>0.00</b> | <b>0.58</b> | 0.80  |
| 3     | 1899.01 | 3922.08 | <b>0.00</b>    | <b>4.60</b>    | <b>186.65</b> | <b>363.68</b> | 0.60  | 86.55 | 90.13 | <b>0.20</b>  | <b>3.44</b>  | <b>0.00</b> | <b>3.10</b> | 0.78  |
| 4     | 3117.24 | 2906.74 | <b>82.00</b>   | <b>132.28</b>  | <b>101.53</b> | <b>0.00</b>   | 0.80  | 42.18 | 58.18 | <b>5.95</b>  | <b>0.00</b>  | <b>0.00</b> | <b>0.00</b> | 0.74  |
| 5     | 2640.95 | 2618.83 | <b>606.87</b>  | <b>20.66</b>   | <b>266.01</b> | <b>0.00</b>   | 0.77  | 53.61 | 57.78 | <b>2.28</b>  | <b>0.00</b>  | <b>1.00</b> | <b>0.00</b> | 0.78  |
| 6     | 2394.58 | 3030.18 | <b>17.28</b>   | <b>91.56</b>   | <b>185.98</b> | <b>0.00</b>   | 0.74  | 30.49 | 89.14 | <b>1.92</b>  | <b>0.00</b>  | <b>0.00</b> | <b>0.00</b> | 0.58  |
| 7     | 2693.34 | 2201.03 | <b>90.44</b>   | <b>401.90</b>  | <b>53.80</b>  | <b>0.00</b>   | 0.82  | 80.22 | 72.46 | <b>0.80</b>  | <b>16.53</b> | <b>0.00</b> | <b>0.00</b> | 0.82  |
| 8     | 2643.83 | 2778.52 | <b>8.20</b>    | <b>317.28</b>  | <b>0.00</b>   | <b>336.46</b> | 0.75  | 41.57 | 64.57 | <b>0.89</b>  | <b>4.29</b>  | <b>0.00</b> | <b>0.00</b> | 0.72  |
| 9     | 2202.03 | 3048.93 | <b>36.66</b>   | <b>394.20</b>  | <b>10.21</b>  | <b>0.00</b>   | 0.74  | 55.58 | 78.83 | <b>5.55</b>  | <b>1.37</b>  | <b>0.00</b> | <b>0.00</b> | 0.74  |
| 10    | 2841.07 | 2128.14 | <b>28.96</b>   | <b>136.27</b>  | <b>0.00</b>   | <b>63.59</b>  | 0.83  | 64.56 | 50.93 | <b>0.69</b>  | <b>4.66</b>  | <b>1.58</b> | <b>7.40</b> | 0.79  |
| 11    | 2923.63 | 3782.49 | <b>0.00</b>    | <b>223.94</b>  | <b>357.97</b> | <b>0.00</b>   | 0.72  | 38.51 | 89.52 | <b>12.38</b> | <b>4.27</b>  | <b>0.00</b> | <b>0.00</b> | 0.63  |
| 12    | 3043.85 | 2414.63 | <b>195.07</b>  | <b>198.70</b>  | 414.83        | <b>0.00</b>   | 0.79  | 54.25 | 71.07 | <b>0.48</b>  | <b>0.33</b>  | <b>2.64</b> | <b>0.00</b> | 0.74  |
| 13    | 3096.70 | 2391.68 | <b>380.26</b>  | <b>38.62</b>   | <b>0.00</b>   | <b>0.00</b>   | 0.84  | 60.14 | 68.16 | <b>17.25</b> | <b>0.00</b>  | <b>0.00</b> | <b>0.00</b> | 0.78  |
| 14    | 2432.85 | 2367.77 | <b>10.74</b>   | <b>457.33</b>  | <b>0.00</b>   | <b>165.20</b> | 0.78  | 49.85 | 53.55 | <b>0.25</b>  | <b>0.03</b>  | <b>0.00</b> | <b>0.00</b> | 0.79  |
| 15    | 2872.87 | 2381.87 | <b>0.00</b>    | <b>43.40</b>   | <b>259.27</b> | <b>215.36</b> | 0.78  | 62.33 | 85.35 | <b>0.84</b>  | <b>0.25</b>  | <b>0.00</b> | 6.75        | 0.72  |
| 16    | 1949.81 | 3066.43 | <b>0.00</b>    | <b>686.50</b>  | <b>0.00</b>   | <b>0.00</b>   | 0.72  | 60.48 | 78.03 | <b>0.99</b>  | <b>12.48</b> | <b>0.00</b> | <b>2.92</b> | 0.74  |
| 17    | 1605.53 | 3316.92 | <b>1388.21</b> | <b>247.90</b>  | <b>220.81</b> | <b>0.00</b>   | 0.63  | 71.48 | 53.51 | <b>0.00</b>  | <b>14.17</b> | <b>0.00</b> | 5.12        | 0.82  |
| 18    | 1195.92 | 2718.24 | <b>86.83</b>   | <b>104.09</b>  | <b>81.95</b>  | <b>0.00</b>   | 0.62  | 26.61 | 68.20 | <b>0.33</b>  | <b>5.75</b>  | <b>0.00</b> | <b>1.53</b> | 0.60  |
| 19    | 2329.66 | 3426.67 | <b>121.82</b>  | <b>0.00</b>    | <b>194.02</b> | 521.18        | 0.66  | 55.51 | 55.54 | <b>1.95</b>  | <b>0.00</b>  | <b>1.42</b> | <b>0.00</b> | 0.79  |
| 20    | 2076.13 | 1945.32 | <b>364.59</b>  | <b>95.58</b>   | <b>50.04</b>  | 513.25        | 0.73  | 59.99 | 59.68 | <b>0.00</b>  | <b>0.97</b>  | <b>0.00</b> | <b>0.00</b> | 0.80  |
| 21    | 3077.63 | 2317.01 | <b>0.00</b>    | <b>0.00</b>    | <b>32.56</b>  | <b>0.00</b>   | 0.84  | 44.40 | 64.85 | <b>0.98</b>  | <b>6.78</b>  | 11.19       | <b>0.00</b> | 0.67  |
| 22    | 1987.63 | 2808.07 | <b>235.30</b>  | <b>1353.64</b> | <b>152.09</b> | 468.61        | 0.66  | 66.60 | 94.38 | <b>0.04</b>  | <b>29.04</b> | <b>6.41</b> | <b>0.00</b> | 0.71  |
| 23    | 2171.32 | 3692.89 | <b>76.03</b>   | <b>11.10</b>   | <b>0.00</b>   | <b>0.00</b>   | 0.70  | 49.86 | 70.49 | <b>0.36</b>  | <b>18.46</b> | <b>1.59</b> | <b>0.00</b> | 0.73  |
| 24    | 2489.81 | 3212.06 | <b>0.00</b>    | 950.74         | <b>0.00</b>   | <b>0.00</b>   | 0.76  | 58.50 | 53.30 | <b>0.16</b>  | <b>2.97</b>  | <b>3.58</b> | <b>0.00</b> | 0.79  |
| 25    | 2212.55 | 2730.97 | 301.91         | 641.40         | 352.19        | <b>137.16</b> | 0.70  | 58.45 | 61.95 | <b>0.14</b>  | 6.18         | <b>0.00</b> | <b>0.00</b> | 0.79  |
| Mean  | 2497.58 | 2872.32 | 171.41         | 262.28         | 116.80        | 134.19        | 0.74  | 56.29 | 70.39 | 2.73         | 5.34         | 1.18        | 1.10        | 0.74  |

Bold in the table indicates the variance component is not significant at  $\alpha = 0.05$ .
