# Supplementary material for: Accuracy of Across-Environment Genome-Wide Prediction in Maize Nested Association Mapping Populations
Source: PubMed Central journal article supplement (PMC3564986; doi:10.1534/g3.112.005066), 2013-02-01
Supplement: supp_3.2.263_TableS3.pdf [file supp_3.2.263_TableS3.pdf]

**Table S3 Estimates of genetic and residual covariance and correlation (in the lower diagonal) based on individual NAM populations 1 – 10**

|       |      | LL                 |        |        |        |                     |        |        |        | LW                 |      |      |      |                     |      |       |      |
|-------|------|--------------------|--------|--------|--------|---------------------|--------|--------|--------|--------------------|------|------|------|---------------------|------|-------|------|
|       |      | Genetic covariance |        |        |        | Residual covariance |        |        |        | Genetic covariance |      |      |      | Residual covariance |      |       |      |
| Popld | Envi | E1                 | E2     | E3     | E4     | E1                  | E2     | E3     | E4     | E1                 | E2   | E3   | E4   | E1                  | E2   | E3    | E4   |
| 1     | E1   | 1038.6             | 1107.1 | 958.5  | 959.7  | 6397.5              | 700.9  | 1076.7 | 1196.0 | 22.3               | 15.2 | 13.7 | 24.5 | 155.0               | 17.7 | 22.6  | 18.0 |
|       | E2   | 0.78               | 1927.2 | 1460.7 | 1500.4 | 0.21                | 1793.2 | 593.7  | 638.0  | 0.70               | 21.2 | 14.2 | 22.6 | 0.18                | 60.3 | 8.9   | 12.6 |
|       | E3   | 0.78               | 0.88   | 1446.4 | 1385.8 | 0.20                | 0.21   | 4380.9 | 1013.4 | 0.76               | 0.81 | 14.4 | 16.3 | 0.18                | 0.12 | 96.6  | 14.8 |
|       | E4   | 0.76               | 0.88   | 0.93   | 1526.6 | 0.21                | 0.21   | 0.21   | 5184.2 | 0.99               | 0.94 | 0.82 | 27.2 | 0.19                | 0.21 | 0.20  | 58.4 |
| 2     | E1   | 545.9              | 514.1  | 489.3  | 451.8  | 6560.8              | 1651.7 | 2176.5 | 1953.7 | 40.9               | 29.0 | 29.8 | 27.1 | 193.0               | 34.3 | 26.4  | 38.0 |
|       | E2   | 0.66               | 1125.4 | 766.9  | 837.0  | 0.41                | 2483.8 | 1345.4 | 1217.4 | 0.93               | 24.0 | 23.7 | 21.7 | 0.28                | 79.5 | 17.0  | 30.3 |
|       | E3   | 0.57               | 0.62   | 1362.7 | 766.3  | 0.40                | 0.41   | 4424.8 | 1584.9 | 0.90               | 0.93 | 26.8 | 22.7 | 0.22                | 0.22 | 76.3  | 25.4 |
|       | E4   | 0.60               | 0.77   | 0.64   | 1043.2 | 0.41                | 0.42   | 0.41   | 3429.8 | 0.86               | 0.90 | 0.89 | 24.2 | 0.33                | 0.41 | 0.35  | 69.3 |
| 3     | E1   | 767.2              | 352.2  | 426.1  | 160.5  | 6004.0              | 1815.0 | 2026.1 | 1729.6 | 72.3               | 43.2 | 25.5 | 35.5 | 127.2               | 19.7 | 39.2  | 24.3 |
|       | E2   | 0.56               | 523.3  | 216.3  | 135.9  | 0.35                | 4491.1 | 1735.4 | 1504.6 | 0.88               | 33.7 | 22.0 | 28.9 | 0.23                | 57.6 | 14.7  | 19.7 |
|       | E3   | 0.59               | 0.36   | 684.8  | 376.3  | 0.35                | 0.34   | 5663.1 | 1670.5 | 0.74               | 0.93 | 16.6 | 19.4 | 0.31                | 0.17 | 127.9 | 31.5 |
|       | E4   | 0.26               | 0.26   | 0.63   | 515.1  | 0.35                | 0.35   | 0.35   | 4082.0 | 0.84               | 0.99 | 0.95 | 25.4 | 0.22                | 0.26 | 0.28  | 96.5 |
| 4     | E1   | 1595.5             | 1091.4 | 1201.5 | 1301.4 | 3903.4              | 889.7  | 1143.3 | 1160.5 | 21.0               | 15.6 | 8.9  | 18.9 | 85.1                | 10.8 | 16.9  | 11.2 |
|       | E2   | 0.74               | 1363.8 | 1182.9 | 1348.0 | 0.33                | 1828.2 | 808.4  | 807.9  | 0.89               | 14.7 | 8.8  | 17.2 | 0.22                | 29.4 | 11.9  | 10.7 |
|       | E3   | 0.72               | 0.77   | 1746.1 | 1369.4 | 0.33                | 0.34   | 3141.9 | 988.2  | 0.84               | 0.99 | 5.3  | 10.7 | 0.21                | 0.25 | 77.8  | 15.4 |
|       | E4   | 0.78               | 0.87   | 0.78   | 1751.5 | 0.33                | 0.34   | 0.32   | 3100.5 | 0.88               | 0.96 | 0.99 | 21.8 | 0.16                | 0.26 | 0.23  | 55.8 |
| 5     | E1   | 718.2              | 693.8  | 823.1  | 605.4  | 3447.5              | 915.5  | 1391.7 | 1276.8 | 11.9               | 11.4 | 10.6 | 15.9 | 108.0               | 22.8 | 44.7  | 30.3 |
|       | E2   | 0.75               | 1206.1 | 943.4  | 821.1  | 0.37                | 1802.2 | 991.2  | 956.8  | 0.86               | 14.7 | 15.8 | 19.7 | 0.41                | 28.4 | 20.9  | 15.5 |
|       | E3   | 0.73               | 0.64   | 1790.9 | 877.2  | 0.37                | 0.37   | 4060.1 | 1392.7 | 0.65               | 0.87 | 22.6 | 21.5 | 0.41                | 0.37 | 110.7 | 29.4 |
|       | E4   | 0.73               | 0.76   | 0.67   | 963.6  | 0.36                | 0.38   | 0.37   | 3563.5 | 0.82               | 0.92 | 0.81 | 31.4 | 0.40                | 0.40 | 0.38  | 53.9 |
| 6     | E1   | 1248.4             | 909.1  | 944.9  | 874.5  | 3144.4              | 1001.7 | 1134.8 | 1055.9 | 18.8               | 8.9  | 12.8 | 14.1 | 109.0               | 9.3  | 11.2  | 9.8  |
|       | E2   | 0.68               | 1454.5 | 764.3  | 956.2  | 0.35                | 2592.1 | 1006.6 | 982.0  | 0.64               | 10.4 | 7.0  | 5.8  | 0.10                | 73.4 | 9.3   | 10.0 |
|       | E3   | 0.87               | 0.65   | 952.3  | 843.9  | 0.35                | 0.34   | 3392.5 | 1092.8 | 0.71               | 0.52 | 17.3 | 13.7 | 0.12                | 0.12 | 81.7  | 11.6 |
|       | E4   | 0.75               | 0.76   | 0.83   | 1092.3 | 0.34                | 0.35   | 0.34   | 3079.2 | 0.93               | 0.51 | 0.94 | 12.2 | 0.12                | 0.15 | 0.16  | 65.0 |
| 7     | E1   | 1281.0             | 882.0  | 1057.2 | 1233.8 | 2408.2              | 600.7  | 773.0  | 606.7  | 29.6               | 31.0 | 24.8 | 33.8 | 98.7                | 19.4 | 21.1  | 20.9 |
|       | E2   | 0.86               | 815.7  | 802.5  | 1051.2 | 0.28                | 1903.5 | 674.4  | 562.0  | 0.94               | 37.0 | 24.8 | 39.0 | 0.24                | 63.9 | 26.8  | 15.2 |
|       | E3   | 0.83               | 0.78   | 1283.1 | 1240.9 | 0.28                | 0.28   | 3085.2 | 697.0  | 0.99               | 0.89 | 21.3 | 30.0 | 0.22                | 0.35 | 94.5  | 9.8  |

|    |    |        |        |        |        |        |        |        |        |      |      |      |      |       |      |      |      |
|----|----|--------|--------|--------|--------|--------|--------|--------|--------|------|------|------|------|-------|------|------|------|
|    | E4 | 0.81   | 0.87   | 0.82   | 1791.4 | 0.28   | 0.29   | 0.28   | 1985.8 | 0.95 | 0.98 | 0.99 | 42.8 | 0.28  | 0.25 | 0.13 | 58.5 |
| 8  | E1 | 1103.5 | 869.4  | 696.9  | 834.2  | 3801.7 | 1592.2 | 1779.6 | 1405.0 | 11.9 | 8.9  | 13.7 | 9.5  | 112.3 | 30.5 | 18.1 | 24.1 |
|    | E2 | 0.69   | 1451.4 | 765.1  | 818.9  | 0.43   | 3556.5 | 1715.7 | 1318.3 | 0.80 | 10.3 | 10.3 | 8.5  | 0.31  | 86.0 | 12.9 | 22.0 |
|    | E3 | 0.57   | 0.55   | 1359.0 | 862.1  | 0.43   | 0.42   | 4620.6 | 1545.3 | 0.88 | 0.71 | 20.4 | 11.4 | 0.23  | 0.19 | 56.3 | 13.1 |
|    | E4 | 0.79   | 0.68   | 0.74   | 1011.5 | 0.44   | 0.42   | 0.43   | 2749.9 | 0.82 | 0.85 | 0.75 | 11.3 | 0.31  | 0.32 | 0.24 | 54.6 |
| 9  | E1 | 747.8  | 479.2  | 686.4  | 603.7  | 2915.3 | 1007.4 | 1334.3 | 1373.2 | 5.3  | 9.6  | 9.3  | 10.4 | 161.2 | 17.4 | 20.2 | 19.7 |
|    | E2 | 0.62   | 802.0  | 567.7  | 578.8  | 0.40   | 2229.4 | 1141.7 | 1228.9 | 0.72 | 34.7 | 22.9 | 19.3 | 0.18  | 56.2 | 15.8 | 9.4  |
|    | E3 | 0.75   | 0.60   | 1134.5 | 869.7  | 0.39   | 0.38   | 4005.1 | 1608.7 | 0.80 | 0.77 | 25.7 | 12.7 | 0.18  | 0.24 | 76.1 | 12.6 |
|    | E4 | 0.64   | 0.59   | 0.75   | 1195.1 | 0.39   | 0.40   | 0.39   | 4303.9 | 0.62 | 0.86 | 0.34 | 52.9 | 0.19  | 0.16 | 0.18 | 64.8 |
| 10 | E1 | 1184.2 | 1040.6 | 975.7  | 787.3  | 2403.3 | 1083.1 | 1457.7 | 1187.1 | 20.8 | 15.9 | 23.1 | 20.4 | 95.7  | 34.7 | 22.8 | 15.9 |
|    | E2 | 0.82   | 1377.4 | 1035.8 | 938.8  | 0.48   | 2132.2 | 1377.2 | 1075.3 | 0.66 | 27.9 | 32.2 | 15.5 | 0.40  | 78.7 | 14.8 | 19.1 |
|    | E3 | 0.78   | 0.77   | 1323.6 | 930.3  | 0.47   | 0.47   | 3963.7 | 1481.9 | 0.74 | 0.90 | 46.6 | 30.2 | 0.29  | 0.21 | 64.8 | 15.6 |
|    | E4 | 0.66   | 0.73   | 0.74   | 1192.8 | 0.48   | 0.46   | 0.47   | 2549.0 | 0.89 | 0.49 | 0.75 | 35.1 | 0.25  | 0.33 | 0.30 | 43.2 |

---

Envi: environment
