# Supplementary material for: Accuracy of Across-Environment Genome-Wide Prediction in Maize Nested Association Mapping Populations
Source: PubMed Central journal article supplement (PMC3564986; doi:10.1534/g3.112.005066), 2013-02-01
Supplement: supp_3.2.263_TableS4.pdf [file supp_3.2.263_TableS4.pdf]

**Table S4 Estimates of genetic and residual covariances and correlations (in the lower diagonal) based on individual NAM populations 11 – 20**

|       |      | LL                 |        |        |        |                     |        |        |        | LW                 |      |      |      |                     |      |       |      |
|-------|------|--------------------|--------|--------|--------|---------------------|--------|--------|--------|--------------------|------|------|------|---------------------|------|-------|------|
|       |      | Genetic covariance |        |        |        | Residual covariance |        |        |        | Genetic covariance |      |      |      | Residual covariance |      |       |      |
| Popld | Envi | E1                 | E2     | E3     | E4     | E1                  | E2     | E3     | E4     | E1                 | E2   | E3   | E4   | E1                  | E2   | E3    | E4   |
| 11    | E1   | 1477.8             | 995.6  | 1208.6 | 1038.0 | 5423.9              | 734.5  | 904.8  | 1294.2 | 22.7               | 13.8 | 18.2 | 20.7 | 93.7                | 2.8  | 5.3   | 4.0  |
|       | E2   | 0.78               | 1090.6 | 880.4  | 956.9  | 0.22                | 2096.7 | 551.5  | 809.9  | 0.72               | 16.0 | 15.4 | 18.9 | 0.04                | 51.0 | 4.0   | 7.5  |
|       | E3   | 0.84               | 0.71   | 1419.1 | 973.4  | 0.22                | 0.22   | 3096.9 | 978.2  | 0.89               | 0.90 | 18.4 | 19.8 | 0.07                | 0.07 | 63.3  | 5.0  |
|       | E4   | 0.78               | 0.84   | 0.75   | 1196.9 | 0.22                | 0.22   | 0.22   | 6486.6 | 0.88               | 0.95 | 0.93 | 24.7 | 0.05                | 0.14 | 0.08  | 58.4 |
| 12    | E1   | 1842.3             | 1351.7 | 1272.0 | 1598.7 | 3464.1              | 907.2  | 1383.5 | 1123.5 | 35.2               | 24.6 | 20.7 | 24.2 | 81.4                | 12.4 | 23.4  | 17.8 |
|       | E2   | 0.86               | 1330.3 | 1000.0 | 1460.9 | 0.37                | 1785.6 | 939.0  | 800.1  | 0.83               | 25.0 | 13.9 | 22.5 | 0.21                | 43.9 | 7.8   | 8.7  |
|       | E3   | 0.85               | 0.78   | 1223.1 | 1194.3 | 0.37                | 0.35   | 3973.9 | 1185.4 | 0.95               | 0.76 | 13.5 | 14.9 | 0.24                | 0.11 | 117.8 | 17.6 |
|       | E4   | 0.83               | 0.89   | 0.76   | 2015.1 | 0.36                | 0.36   | 0.35   | 2833.8 | 0.84               | 0.92 | 0.83 | 23.8 | 0.27                | 0.18 | 0.22  | 52.2 |
| 13    | E1   | 1157.0             | 820.0  | 1085.7 | 561.1  | 2534.7              | 1538.2 | 1589.9 | 2216.2 | 44.6               | 20.8 | 21.8 | 27.3 | 89.9                | 31.5 | 28.3  | 18.7 |
|       | E2   | 0.79               | 926.8  | 1079.4 | 635.1  | 0.61                | 2482.2 | 1508.1 | 2118.0 | 0.72               | 18.7 | 12.5 | 22.4 | 0.43                | 59.0 | 32.6  | 17.3 |
|       | E3   | 0.79               | 0.88   | 1618.3 | 638.2  | 0.58                | 0.56   | 2922.8 | 2239.8 | 0.89               | 0.78 | 13.6 | 17.1 | 0.32                | 0.45 | 88.0  | 23.9 |
|       | E4   | 0.69               | 0.87   | 0.66   | 579.5  | 0.61                | 0.59   | 0.58   | 5145.9 | 0.87               | 1.00 | 0.98 | 22.3 | 0.22                | 0.25 | 0.29  | 79.5 |
| 14    | E1   | 1044.0             | 1056.3 | 541.5  | 712.2  | 3710.3              | 1648.1 | 1699.0 | 1545.3 | 21.6               | 17.1 | 13.6 | 19.1 | 60.6                | 21.4 | 16.2  | 22.6 |
|       | E2   | 0.80               | 1660.8 | 665.6  | 973.8  | 0.51                | 2809.6 | 1441.5 | 1360.5 | 0.93               | 15.6 | 12.9 | 15.1 | 0.29                | 88.9 | 26.7  | 16.2 |
|       | E3   | 0.68               | 0.66   | 607.9  | 521.3  | 0.50                | 0.48   | 3177.0 | 1443.4 | 0.80               | 0.89 | 13.5 | 15.1 | 0.22                | 0.30 | 86.7  | 20.1 |
|       | E4   | 0.70               | 0.76   | 0.67   | 995.7  | 0.49                | 0.50   | 0.50   | 2680.9 | 0.98               | 0.92 | 0.98 | 17.5 | 0.42                | 0.25 | 0.31  | 48.3 |
| 15    | E1   | 1116.9             | 701.5  | 432.1  | 712.4  | 5458.0              | 1562.6 | 2514.5 | 2265.9 | 29.7               | 18.9 | 15.2 | 25.0 | 209.5               | 22.0 | 32.3  | 28.5 |
|       | E2   | 0.76               | 761.6  | 505.7  | 723.7  | 0.49                | 1846.1 | 1451.3 | 1417.0 | 0.77               | 20.4 | 18.6 | 25.5 | 0.25                | 35.9 | 8.1   | 13.3 |
|       | E3   | 0.52               | 0.73   | 626.9  | 613.2  | 0.49                | 0.48   | 4888.6 | 2165.8 | 0.54               | 0.80 | 26.4 | 30.3 | 0.24                | 0.14 | 89.1  | 22.6 |
|       | E4   | 0.68               | 0.84   | 0.79   | 970.6  | 0.48                | 0.52   | 0.49   | 4079.6 | 0.77               | 0.94 | 0.99 | 35.7 | 0.24                | 0.27 | 0.29  | 70.4 |
| 16    | E1   | 750.8              | 418.4  | 556.6  | 387.0  | 3625.6              | 1213.3 | 1309.3 | 1502.7 | 36.9               | 27.9 | 25.6 | 35.2 | 121.8               | 8.3  | 7.3   | 8.4  |
|       | E2   | 0.62               | 614.7  | 441.7  | 418.7  | 0.38                | 2802.1 | 1151.5 | 1343.1 | 0.79               | 33.9 | 22.5 | 31.9 | 0.10                | 54.0 | 7.4   | 6.4  |
|       | E3   | 0.67               | 0.59   | 924.5  | 429.5  | 0.37                | 0.37   | 3396.9 | 1410.2 | 0.98               | 0.90 | 18.5 | 25.2 | 0.07                | 0.11 | 87.8  | 12.8 |
|       | E4   | 0.67               | 0.80   | 0.67   | 451.7  | 0.38                | 0.39   | 0.37   | 4257.6 | 0.97               | 0.92 | 0.98 | 35.7 | 0.10                | 0.12 | 0.18  | 55.9 |
| 17    | E1   | 585.4              | 119.0  | 414.2  | 386.1  | 3786.1              | 1236.2 | 1156.0 | 1077.8 | 36.4               | 34.5 | 22.6 | 35.2 | 62.6                | 10.4 | 15.7  | 16.7 |
|       | E2   | 0.34               | 210.5  | 136.6  | 285.0  | 0.30                | 4471.4 | 1226.4 | 1175.0 | 0.94               | 37.0 | 25.1 | 40.1 | 0.20                | 45.2 | 15.2  | 9.5  |
|       | E3   | 0.75               | 0.41   | 526.9  | 499.8  | 0.30                | 0.29   | 3945.9 | 1067.2 | 0.83               | 0.91 | 20.5 | 27.6 | 0.21                | 0.24 | 85.8  | 25.2 |

|    |    |        |        |        |        |        |        |        |        |      |      |      |      |      |      |      |      |
|----|----|--------|--------|--------|--------|--------|--------|--------|--------|------|------|------|------|------|------|------|------|
|    | E4 | 0.59   | 0.73   | 0.81   | 720.8  | 0.31   | 0.31   | 0.30   | 3305.8 | 0.87 | 0.99 | 0.91 | 44.7 | 0.26 | 0.17 | 0.34 | 65.3 |
| 18 | E1 | 741.1  | 316.8  | 168.0  | 257.1  | 2964.9 | 994.9  | 1188.7 | 1167.9 | 26.1 | 15.7 | 8.8  | 9.5  | 82.3 | 5.9  | 5.5  | 7.0  |
|    | E2 | 0.61   | 366.0  | 191.7  | 278.7  | 0.36   | 2524.1 | 1079.0 | 1068.2 | 0.93 | 11.0 | 9.2  | 7.3  | 0.08 | 64.3 | 8.2  | 5.6  |
|    | E3 | 0.38   | 0.62   | 258.9  | 158.5  | 0.36   | 0.35   | 3702.0 | 1267.1 | 0.50 | 0.80 | 12.0 | 7.4  | 0.07 | 0.13 | 67.6 | 5.9  |
|    | E4 | 0.40   | 0.62   | 0.42   | 559.8  | 0.36   | 0.36   | 0.35   | 3536.1 | 0.61 | 0.72 | 0.70 | 9.4  | 0.11 | 0.10 | 0.10 | 49.0 |
| 19 | E1 | 1183.4 | 691.2  | 1095.4 | 608.9  | 3515.3 | 1627.3 | 1454.4 | 1619.9 | 22.8 | 15.4 | 19.3 | 19.4 | 75.5 | 25.7 | 24.1 | 27.8 |
|    | E2 | 0.56   | 1273.4 | 731.1  | 542.0  | 0.40   | 4657.2 | 1637.7 | 1863.9 | 0.77 | 17.4 | 14.3 | 16.4 | 0.34 | 77.7 | 19.3 | 16.4 |
|    | E3 | 0.81   | 0.52   | 1566.3 | 827.9  | 0.39   | 0.38   | 3944.8 | 1744.0 | 0.88 | 0.74 | 21.3 | 19.4 | 0.31 | 0.25 | 78.5 | 17.2 |
|    | E4 | 0.65   | 0.56   | 0.77   | 742.2  | 0.39   | 0.39   | 0.40   | 4893.3 | 0.89 | 0.86 | 0.92 | 20.8 | 0.44 | 0.25 | 0.26 | 53.8 |
| 20 | E1 | 1688.2 | 1084.4 | 752.9  | 981.9  | 2754.9 | 972.3  | 1250.2 | 1241.4 | 24.4 | 20.0 | 19.2 | 19.4 | 91.0 | 23.9 | 15.0 | 27.8 |
|    | E2 | 0.80   | 1098.6 | 560.2  | 920.7  | 0.48   | 1508.4 | 942.4  | 912.0  | 0.97 | 17.5 | 15.3 | 20.9 | 0.36 | 49.8 | 22.8 | 19.3 |
|    | E3 | 0.67   | 0.62   | 748.9  | 759.5  | 0.44   | 0.45   | 2875.9 | 1313.2 | 0.83 | 0.78 | 21.9 | 21.8 | 0.18 | 0.36 | 79.5 | 17.9 |
|    | E4 | 0.63   | 0.73   | 0.73   | 1444.0 | 0.45   | 0.45   | 0.46   | 2789.6 | 0.78 | 0.99 | 0.92 | 25.6 | 0.40 | 0.38 | 0.28 | 52.7 |

---

Envi: environment
