# Supplementary material for: Accuracy of Across-Environment Genome-Wide Prediction in Maize Nested Association Mapping Populations
Source: PubMed Central journal article supplement (PMC3564986; doi:10.1534/g3.112.005066), 2013-02-01
Supplement: supp_3.2.263_TableS5.pdf [file supp_3.2.263_TableS5.pdf]

**Table S5 Estimates of genetic and residual covariances and correlations (in the lower diagonal) based on individual NAM populations 21-25**

| PopId | Envi | LL                 |        |        |        |                     |        |        |        | LW                 |      |      |      |                     |       |       |      |
|-------|------|--------------------|--------|--------|--------|---------------------|--------|--------|--------|--------------------|------|------|------|---------------------|-------|-------|------|
|       |      | Genetic covariance |        |        |        | Residual covariance |        |        |        | Genetic covariance |      |      |      | Residual covariance |       |       |      |
|       |      | E1                 | E2     | E3     | E4     | E1                  | E2     | E3     | E4     | E1                 | E2   | E3   | E4   | E1                  | E2    | E3    | E4   |
| 21    | E1   | 1153.0             | 1104.6 | 913.2  | 905.8  | 2485.8              | 1047.1 | 1313.0 | 965.1  | 32.4               | 16.3 | 18.8 | 17.0 | 69.6                | 4.7   | 15.0  | 11.0 |
|       | E2   | 0.81               | 1603.0 | 1203.6 | 1269.5 | 0.44                | 2329.9 | 1258.4 | 943.2  | 0.68               | 17.6 | 9.5  | 9.2  | 0.07                | 69.84 | 7.07  | 12.5 |
|       | E3   | 0.79               | 0.88   | 1167.9 | 1097.4 | 0.43                | 0.43   | 3690.1 | 1186.7 | 0.65               | 0.45 | 25.8 | 13.9 | 0.18                | 0.09  | 98.2  | 6.8  |
|       | E4   | 0.72               | 0.85   | 0.86   | 1391.6 | 0.41                | 0.42   | 0.42   | 2212.9 | 0.82               | 0.60 | 0.75 | 13.4 | 0.16                | 0.19  | 0.09  | 64.7 |
| 22    | E1   | 1000.1             | 1000.2 | 477.3  | 375.1  | 4400.6              | 1041.3 | 1010.4 | 996.9  | 30.4               | 25.9 | 18.9 | 20.9 | 243.8               | 17.8  | 28.6  | 15.5 |
|       | E2   | 0.71               | 1972.3 | 625.6  | 694.1  | 0.29                | 2934.1 | 831.3  | 839.4  | 0.84               | 31.5 | 16.6 | 25.0 | 0.15                | 56.6  | 15.2  | 13.3 |
|       | E3   | 0.57               | 0.53   | 707.1  | 552.6  | 0.29                | 0.29   | 2788.5 | 808.0  | 0.95               | 0.82 | 13.0 | 14.4 | 0.19                | 0.21  | 92.2  | 11.8 |
|       | E4   | 0.42               | 0.56   | 0.74   | 786.1  | 0.29                | 0.29   | 0.29   | 2780.3 | 0.83               | 0.98 | 0.87 | 21.0 | 0.14                | 0.24  | 0.17  | 52.1 |
| 23    | E1   | 1329.2             | 842.1  | 765.1  | 831.6  | 3094.9              | 776.0  | 778.0  | 872.5  | 17.0               | 13.4 | 18.3 | 19.9 | 102.6               | 27.2  | 21.4  | 20.8 |
|       | E2   | 0.70               | 1097.0 | 633.3  | 703.5  | 0.24                | 3333.9 | 800.1  | 905.6  | 0.69               | 22.3 | 14.0 | 18.0 | 0.27                | 96.7  | 21.1  | 19.7 |
|       | E3   | 0.85               | 0.78   | 603.7  | 622.1  | 0.24                | 0.24   | 3317.6 | 905.5  | 0.98               | 0.65 | 20.5 | 14.3 | 0.27                | 0.27  | 62.0  | 15.0 |
|       | E4   | 0.72               | 0.67   | 0.80   | 995.9  | 0.24                | 0.24   | 0.24   | 4239.4 | 0.99               | 0.78 | 0.65 | 23.5 | 0.27                | 0.27  | 0.25  | 56.6 |
| 24    | E1   | 1495.4             | 541.3  | 724.0  | 537.2  | 3241.0              | 1437.8 | 1738.8 | 1528.7 | 39.5               | 22.4 | 24.7 | 27.0 | 72.2                | 12.9  | 19.4  | 19.1 |
|       | E2   | 0.78               | 318.5  | 427.3  | 306.8  | 0.43                | 3479.4 | 1815.5 | 1611.7 | 0.78               | 20.8 | 18.2 | 17.6 | 0.19                | 66.6  | 18.2  | 18.5 |
|       | E3   | 0.53               | 0.68   | 1242.5 | 610.6  | 0.42                | 0.43   | 5179.5 | 1917.9 | 0.93               | 0.94 | 18.1 | 17.1 | 0.25                | 0.24  | 83.8  | 13.8 |
|       | E4   | 0.54               | 0.67   | 0.67   | 664.0  | 0.42                | 0.43   | 0.42   | 4031.1 | 0.95               | 0.85 | 0.88 | 20.6 | 0.31                | 0.31  | 0.21  | 52.6 |
| 25    | E1   | 1607.2             | 918.9  | 1127.7 | 697.3  | 2857.2              | 1072.6 | 1288.7 | 1393.5 | 29.9               | 18.1 | 16.0 | 20.1 | 85.2                | 28.3  | 26.8  | 22.6 |
|       | E2   | 0.73               | 978.6  | 727.8  | 766.6  | 0.41                | 2432.8 | 1174.9 | 1302.6 | 0.59               | 31.8 | 9.3  | 30.3 | 0.44                | 47.6  | 26.7  | 26.9 |
|       | E3   | 0.77               | 0.63   | 1348.0 | 666.3  | 0.40                | 0.39   | 3725.9 | 1592.9 | 0.85               | 0.48 | 12.0 | 11.8 | 0.28                | 0.37  | 110.2 | 29.9 |
|       | E4   | 0.59               | 0.82   | 0.61   | 883.6  | 0.40                | 0.40   | 0.40   | 4337.6 | 0.61               | 0.89 | 0.56 | 36.5 | 0.32                | 0.51  | 0.37  | 59.4 |

Envi: environment
