# Supplementary material for: Accuracy of Across-Environment Genome-Wide Prediction in Maize Nested Association Mapping Populations
Source: PubMed Central journal article supplement (PMC3564986; doi:10.1534/g3.112.005066), 2013-02-01
Supplement: supp_3.2.263_TableS6.pdf [file supp_3.2.263_TableS6.pdf]

**Table S6 Estimates of genetic and residual covariance and correlation (in the lower diagonal) based on a full data set of 25 NAM populations.**

| LL                 |        |        |        |        | LW                  |         |         |         |                    |       |      |       |                     |       |        |       |
|--------------------|--------|--------|--------|--------|---------------------|---------|---------|---------|--------------------|-------|------|-------|---------------------|-------|--------|-------|
| Genetic covariance |        |        |        |        | Residual covariance |         |         |         | Genetic covariance |       |      |       | Residual covariance |       |        |       |
| Envi               | E1     | E2     | E3     | E4     | E1                  | E2      | E3      | E4      | E1                 | E2    | E3   | E4    | E1                  | E2    | E3     | E4    |
| E1                 | 401.98 | 357.82 | 364.59 | 345.25 | 5097.97             | 2021.13 | 2029.87 | 1977.42 | 12.94              | 9.743 | 9.70 | 10.97 | 137.20              | 38.03 | 35.99  | 42.44 |
| E2                 | 0.83   | 460.65 | 351.99 | 393.84 | 0.45                | 3882.87 | 1719.01 | 1992.78 | 0.90               | 8.97  | 7.72 | 9.44  | 0.36                | 81.45 | 81.45  | 30.95 |
| E3                 | 0.88   | 0.79   | 427.45 | 373.01 | 0.40                | 0.38    | 5261.99 | 2016.00 | 0.91               | 0.87  | 8.74 | 8.92  | 0.30                | 0.34  | 104.49 | 35.47 |
| E4                 | 0.82   | 0.87   | 0.86   | 440.38 | 0.40                | 0.46    | 0.40    | 4872.04 | 0.92               | 0.95  | 0.91 | 11.09 | 0.39                | 0.44  | 0.38   | 85.04 |

Envi: environment
