# Supplementary material for: Accuracy of Across-Environment Genome-Wide Prediction in Maize Nested Association Mapping Populations
Source: PubMed Central journal article supplement (PMC3564986; doi:10.1534/g3.112.005066), 2013-02-01
Supplement: supp_3.2.263_TableS7.pdf [file supp_3.2.263_TableS7.pdf]

**Table S7 Accuracy of WP prediction for environment E1 with QP and GWP in CV1**

| PopId | LL              |                  |                          |                          | LW              |                  |                          |                  |
|-------|-----------------|------------------|--------------------------|--------------------------|-----------------|------------------|--------------------------|------------------|
|       | SE              |                  | ME                       |                          | SE              |                  | ME                       |                  |
|       | QP <sup>a</sup> | GWP <sup>b</sup> | QP <sup>c</sup>          | GWP <sup>d</sup>         | QP <sup>a</sup> | GWP <sup>b</sup> | QP <sup>c</sup>          | GWP <sup>d</sup> |
| 1     | 0.25(1.5)       | 0.33(0.32)       | 0.34(3.3, 0.36)          | 0.42(0.24, 0.27)         | 0.06(1.4)       | 0.29(3.83)       | 0.11(2.1, 0.83)          | 0.39(2.55, 0.34) |
| 2     | 0.02(1.1)       | 0.17(7.50)       | 0.01(1.6, <b>-0.50</b> ) | 0.24(23.00, 0.41)        | 0.25(2.0)       | 0.40(0.60)       | 0.18(1.8, -0.28)         | 0.45(1.50, 0.12) |
| 3     | 0.09(1.2)       | 0.28(2.11)       | 0.08(1.7, <b>-0.11</b> ) | 0.28(2.50, <b>0.00</b> ) | 0.39(3.2)       | 0.55(0.41)       | 0.36(3.0, -0.08)         | 0.59(0.64, 0.07) |
| 4     | 0.24(2.8)       | 0.48(1.00)       | 0.22(3.3, <b>-0.08</b> ) | 0.50(1.27, 0.04)         | 0.25(2.6)       | 0.49(0.96)       | 0.21(2.4, -0.16)         | 0.53(1.52, 0.08) |
| 5     | 0.16(2.0)       | 0.32(1.00)       | 0.22(3.0, 0.38)          | 0.39(0.77, 0.22)         | 0.05(1.4)       | 0.20(3.00)       | 0.03(1.6, <b>-0.40</b> ) | 0.29(8.67, 0.45) |
| 6     | 0.26(2.4)       | 0.50(0.92)       | 0.22(2.8, -0.15)         | 0.53(1.41, 0.06)         | 0.03(1.4)       | 0.32(9.67)       | 0.06(1.6, 1.00)          | 0.38(5.33, 0.19) |
| 7     | 0.33(2.7)       | 0.52(0.58)       | 0.29(2.4, -0.12)         | 0.57(0.97, 0.10)         | 0.26(2.8)       | 0.48(0.85)       | 0.22(2.5, -0.15)         | 0.52(1.36, 0.08) |
| 8     | 0.07(1.6)       | 0.31(3.43)       | 0.08(2.0, <b>0.14</b> )  | 0.35(3.37, 0.13)         | 0.06(1.4)       | 0.31(4.17)       | 0.16(1.9, 1.67)          | 0.38(1.38, 0.23) |
| 9     | 0.31(2.3)       | 0.34(0.10)       | 0.25(2.5, -0.19)         | 0.38(0.52, 0.12)         | 0.02(1.1)       | 0.17(7.50)       | 0.13(2.1, 5.50)          | 0.36(1.77, 1.12) |
| 10    | 0.26(2.4)       | 0.47(0.81)       | 0.22(2.8, -0.15)         | 0.49(1.23, 0.04)         | 0.20(2.5)       | 0.39(0.95)       | 0.17(3.1, <b>-0.15</b> ) | 0.52(2.06, 0.33) |
| 11    | 0.26(2.4)       | 0.37(0.42)       | 0.27(3.0, <b>0.04</b> )  | 0.45(0.67, 0.22)         | 0.13(2.5)       | 0.39(2.00)       | 0.15(3.1, <b>0.15</b> )  | 0.42(1.80, 0.08) |
| 12    | 0.24(3.0)       | 0.49(1.04)       | 0.20(2.6, -0.17)         | 0.54(1.70, 0.10)         | 0.29(3.1)       | 0.54(0.86)       | 0.31(3.3, 0.07)          | 0.57(0.84, 0.06) |
| 13    | 0.20(2.7)       | 0.45(1.25)       | 0.16(2.9, -0.20)         | 0.47(1.94, 0.04)         | 0.34(3.0)       | 0.50(0.47)       | 0.28(3.5, -0.18)         | 0.52(0.86, 0.04) |
| 14    | 0.13(2.0)       | 0.38(1.92)       | 0.14(2.3, <b>0.08</b> )  | 0.42(2.00, 0.11)         | 0.20(2.4)       | 0.47(1.35)       | 0.14(1.9, -0.30)         | 0.50(2.57, 0.06) |
| 15    | 0.09(1.6)       | 0.28(2.11)       | 0.07(1.9, <b>-0.22</b> ) | 0.31(3.43, 0.11)         | 0.13(1.8)       | 0.30(1.31)       | 0.12(2.8, <b>-0.08</b> ) | 0.34(1.83, 0.13) |
| 16    | 0.22(1.9)       | 0.33(0.50)       | 0.18(2.0, -0.18)         | 0.36(1.00, 0.09)         | 0.24(2.4)       | 0.46(0.92)       | 0.31(3.2, 0.29)          | 0.54(0.74, 0.17) |
| 17    | 0.03(1.2)       | 0.27(8.00)       | 0.04(1.2, <b>0.33</b> )  | 0.29(6.25, 0.07)         | 0.33(3.0)       | 0.55(0.67)       | 0.33(3.7, <b>0.00</b> )  | 0.59(0.79, 0.07) |
| 18    | 0.08(1.2)       | 0.28(2.50)       | 0.03(1.2, -0.62)         | 0.28(8.33, <b>0.00</b> ) | 0.19(2.1)       | 0.39(1.05)       | 0.23(2.5, 0.21)          | 0.43(0.87, 0.10) |
| 19    | 0.29(2.4)       | 0.37(0.28)       | 0.20(2.1, -0.31)         | 0.40(1.00, 0.08)         | 0.29(2.2)       | 0.41(0.41)       | 0.28(2.7, <b>-0.03</b> ) | 0.44(0.57, 0.07) |
| 20    | 0.15(2.6)       | 0.47(2.13)       | 0.09(2.4, -0.40)         | 0.48(4.33, 0.02)         | 0.21(2.2)       | 0.47(1.24)       | 0.29(2.7, 0.38)          | 0.51(0.76, 0.09) |
| 21    | 0.35(3.1)       | 0.49(0.40)       | 0.32(3.4, <b>-0.09</b> ) | 0.51(0.59, 0.04)         | 0.19(2.2)       | 0.47(1.47)       | 0.11(2.1, -0.42)         | 0.48(3.36, 0.02) |
| 22    | 0.16(1.5)       | 0.35(1.19)       | 0.19(2.4, <b>0.19</b> )  | 0.41(1.16, 0.17)         | 0.03(1.2)       | 0.32(9.67)       | 0.12(2.0, 3.00)          | 0.42(2.50, 0.31) |
| 23    | 0.31(3.1)       | 0.42(0.35)       | 0.24(2.6, -0.23)         | 0.46(0.92, 0.10)         | 0.06(1.8)       | 0.29(3.83)       | 0.17(2.9, 1.83)          | 0.43(1.53, 0.48) |
| 24    | 0.18(2.7)       | 0.45(1.50)       | 0.11(1.8, -0.39)         | 0.44(3.00, -0.02)        | 0.33(3.1)       | 0.50(0.52)       | 0.36(3.0, 0.09)          | 0.53(0.47, 0.06) |
| 25    | 0.20(2.8)       | 0.50(1.50)       | 0.20(2.6, <b>0.00</b> )  | 0.51(1.55, 0.02)         | 0.26(2.9)       | 0.45(0.73)       | 0.25(2.4, <b>-0.04</b> ) | 0.48(0.92, 0.07) |
| Mean  | 0.20(2.2)       | 0.38(0.93)       | 0.17(2.4, -0.10)         | 0.42(1.40, 0.10)         | 0.19(2.2)       | 0.40(1.11)       | 0.20(2.6, 0.06)          | 0.46(1.29, 0.15) |

<sup>a</sup> In parentheses is the number of QTL identified by QP based on the SE model; <sup>b</sup> In parentheses is the gain in prediction accuracy with GWP over QP based on the SE model; <sup>c</sup> The first value in parentheses is the number of QTL identified by QP based on the ME model; and the second one the gain

with ME over SE for QP; <sup>d</sup> The first value in parentheses is the gain in accuracy with GWP over QP based on the ME model; and the second one is the gain with ME over SE using GWP. Bold in parentheses indicates the number is not significant at  $\alpha = 0.05$ .
