# Supplementary material for: Accuracy of Across-Environment Genome-Wide Prediction in Maize Nested Association Mapping Populations
Source: PubMed Central journal article supplement (PMC3564986; doi:10.1534/g3.112.005066), 2013-02-01
Supplement: supp_3.2.263_TableS8.pdf [file supp_3.2.263_TableS8.pdf]

**Table S8 Accuracy of WP prediction for environment E2 with QP and GWP in CV1**

| PopId | LL              |                  |                          |                          | LW              |                  |                          |                          |
|-------|-----------------|------------------|--------------------------|--------------------------|-----------------|------------------|--------------------------|--------------------------|
|       | SE              |                  | ME                       |                          | SE              |                  | ME                       |                          |
|       | QP <sup>a</sup> | GWP <sup>b</sup> | QP <sup>c</sup>          | GWP <sup>d</sup>         | QP <sup>a</sup> | GWP <sup>b</sup> | QP <sup>c</sup>          | GWP <sup>d</sup>         |
| 1     | 0.50(4.0)       | 0.67(0.34)       | 0.48(3.3, <b>-0.04</b> ) | 0.67(0.40, <b>0.00</b> ) | 0.17(2.5)       | 0.46(1.71)       | 0.16(2.1, <b>-0.06</b> ) | 0.50(2.12, 0.09)         |
| 2     | 0.11(2.2)       | 0.40(2.64)       | 0.05(1.6, -0.55)         | 0.40(7.00, <b>0.00</b> ) | 0.21(2.5)       | 0.49(1.33)       | 0.17(1.8, -0.19)         | 0.53(2.12, 0.08)         |
| 3     | 0.21(1.8)       | 0.17(-0.19)      | 0.09(1.7, -0.57)         | 0.18(1.00, 0.06)         | 0.35(3.3)       | 0.59(0.69)       | 0.35(3.0, <b>0.00</b> )  | 0.61(0.74, 0.03)         |
| 4     | 0.20(2.9)       | 0.56(1.80)       | 0.25(3.3, 0.25)          | 0.57(1.28, 0.02)         | 0.41(3.0)       | 0.59(0.44)       | 0.28(2.4, -0.32)         | 0.62(1.21, 0.05)         |
| 5     | 0.27(3.0)       | 0.50(0.85)       | 0.25(3.0, <b>-0.07</b> ) | 0.51(1.04, 0.02)         | 0.07(2.4)       | 0.45(5.43)       | 0.05(1.6, <b>-0.29</b> ) | 0.46(8.20, 0.02)         |
| 6     | 0.22(2.6)       | 0.49(1.23)       | 0.17(2.8, -0.23)         | 0.50(1.94, 0.02)         | 0.07(1.2)       | 0.33(3.71)       | 0.09(1.6, <b>0.29</b> )  | 0.34(2.78, 0.03)         |
| 7     | 0.25(2.0)       | 0.42(0.68)       | 0.25(2.4, <b>0.00</b> )  | 0.51(1.04, 0.21)         | 0.35(3.0)       | 0.58(0.66)       | 0.27(2.5, -0.23)         | 0.62(1.30, 0.07)         |
| 8     | 0.10(1.9)       | 0.35(2.50)       | 0.11(2.0, <b>0.10</b> )  | 0.37(2.36, 0.06)         | 0.21(1.6)       | 0.35(0.67)       | 0.21(1.9, <b>0.00</b> )  | 0.42(1.00, 0.20)         |
| 9     | 0.07(2.0)       | 0.30(3.29)       | 0.11(2.5, 0.57)          | 0.32(1.91, 0.07)         | 0.22(2.3)       | 0.44(1.00)       | 0.25(2.1, 0.14)          | 0.43(0.72, -0.02)        |
| 10    | 0.19(2.7)       | 0.50(1.63)       | 0.18(2.8, <b>-0.05</b> ) | 0.51(1.83, 0.02)         | 0.14(1.9)       | 0.36(1.57)       | 0.18(3.1, 0.29)          | 0.36(1.00, <b>0.00</b> ) |
| 11    | 0.26(2.8)       | 0.52(1.00)       | 0.31(3.0, 0.19)          | 0.55(0.77, 0.06)         | 0.27(2.0)       | 0.40(0.48)       | 0.25(3.1, <b>-0.07</b> ) | 0.43(0.72, 0.07)         |
| 12    | 0.22(3.0)       | 0.56(1.55)       | 0.21(2.6, <b>-0.05</b> ) | 0.59(1.81, 0.05)         | 0.27(3.4)       | 0.58(1.15)       | 0.30(3.3, 0.11)          | 0.61(1.03, 0.05)         |
| 13    | 0.21(2.4)       | 0.40(0.90)       | 0.19(2.9, <b>-0.10</b> ) | 0.45(1.37, 0.12)         | 0.18(2.1)       | 0.39(1.17)       | 0.19(3.5, <b>0.06</b> )  | 0.47(1.47, 0.21)         |
| 14    | 0.32(2.9)       | 0.42(0.31)       | 0.19(2.3, -0.41)         | 0.42(1.21, <b>0.00</b> ) | 0.05(1.4)       | 0.27(4.40)       | 0.07(1.9, <b>0.40</b> )  | 0.36(4.14, 0.33)         |
| 15    | 0.25(3.0)       | 0.46(0.84)       | 0.15(1.9, -0.40)         | 0.46(2.07, <b>0.00</b> ) | 0.21(2.9)       | 0.55(1.62)       | 0.18(2.8, -0.14)         | 0.58(2.22, 0.05)         |
| 16    | 0.19(2.1)       | 0.31(0.63)       | 0.17(2.0, <b>-0.11</b> ) | 0.32(0.88, 0.03)         | 0.44(3.3)       | 0.56(0.27)       | 0.36(3.2, -0.18)         | 0.59(0.64, 0.05)         |
| 17    | 0.04(0.9)       | 0.13(2.25)       | 0.02(1.2, <b>-0.50</b> ) | 0.19(8.50, 0.46)         | 0.40(3.5)       | 0.61(0.52)       | 0.38(3.7, <b>-0.05</b> ) | 0.64(0.68, 0.05)         |
| 18    | 0.02(1.1)       | 0.29(13.50)      | 0.03(1.2, <b>0.50</b> )  | 0.31(9.33, 0.07)         | 0.18(1.9)       | 0.30(0.67)       | 0.27(2.5, 0.50)          | 0.43(0.59, 0.43)         |
| 19    | 0.08(1.5)       | 0.28(2.50)       | 0.05(2.1, -0.38)         | 0.30(5.00, 0.07)         | 0.20(2.3)       | 0.40(1.00)       | 0.25(2.7, 0.25)          | 0.46(0.84, 0.15)         |
| 20    | 0.11(2.2)       | 0.52(3.73)       | 0.10(2.4, <b>-0.09</b> ) | 0.54(4.40, 0.04)         | 0.31(3.0)       | 0.53(0.71)       | 0.31(2.7, <b>0.00</b> )  | 0.56(0.81, 0.06)         |
| 21    | 0.35(3.3)       | 0.58(0.66)       | 0.35(3.4, <b>0.00</b> )  | 0.61(0.74, 0.05)         | 0.14(1.8)       | 0.35(1.50)       | 0.08(2.1, -0.43)         | 0.40(4.00, 0.14)         |
| 22    | 0.34(2.6)       | 0.49(0.44)       | 0.22(2.4, -0.35)         | 0.50(1.27, 0.02)         | 0.32(2.9)       | 0.58(0.81)       | 0.23(2.0, -0.28)         | 0.60(1.61, 0.03)         |
| 23    | 0.16(2.4)       | 0.43(1.69)       | 0.16(2.6, <b>0.00</b> )  | 0.46(1.88, 0.07)         | 0.24(2.0)       | 0.36(0.50)       | 0.21(2.9, <b>-0.12</b> ) | 0.41(0.95, 0.14)         |
| 24    | 0.01(1.2)       | 0.16(15.00)      | 0.06(1.8, 5.00)          | 0.25(3.17, 0.56)         | 0.25(2.2)       | 0.42(0.68)       | 0.32(3.0, 0.28)          | 0.48(0.50, 0.14)         |
| 25    | 0.10(2.2)       | 0.38(2.80)       | 0.05(2.6, -0.50)         | 0.42(7.40, 0.11)         | 0.29(2.7)       | 0.47(0.62)       | 0.27(2.4, <b>-0.07</b> ) | 0.45(0.67, -0.04)        |
| Mean  | 0.19(2.4)       | 0.41(1.15)       | 0.17(2.4, -0.12)         | 0.44(1.60, 0.06)         | 0.24(2.4)       | 0.46(0.92)       | 0.23(2.6, -0.05)         | 0.49(1.18, 0.08)         |

<sup>a</sup> In parentheses is the number of QTL identified by QP based on the SE model; <sup>b</sup> In parentheses is the gain in prediction accuracy with GWP over QP based on the SE model; <sup>c</sup> The first value in parentheses is the number of QTL identified by QP based on the ME model; and the second one the gain

with ME over SE for QP; <sup>d</sup> The first value in parentheses is the gain in accuracy with GWP over QP based on the ME model; and the second one is the gain with ME over SE using GWP. Bold in parentheses indicates the number is not significant at  $\alpha = 0.05$ .
