# Supplementary material for: Accuracy of Across-Environment Genome-Wide Prediction in Maize Nested Association Mapping Populations
Source: PubMed Central journal article supplement (PMC3564986; doi:10.1534/g3.112.005066), 2013-02-01
Supplement: supp_3.2.263_TableS9.pdf [file supp_3.2.263_TableS9.pdf]

**Table S9 Accuracy of WP prediction for environment E3 with QP and GWP in CV1**

| PopId | LL              |                  |                          |                  | LW              |                  |                         |                          |
|-------|-----------------|------------------|--------------------------|------------------|-----------------|------------------|-------------------------|--------------------------|
|       | SE              |                  | ME                       |                  | SE              |                  | ME                      |                          |
|       | QP <sup>a</sup> | GWP <sup>b</sup> | QP <sup>c</sup>          | GWP <sup>d</sup> | QP <sup>a</sup> | GWP <sup>b</sup> | QP <sup>c</sup>         | GWP <sup>d</sup>         |
| 1     | 0.32(2.8)       | 0.51(0.59)       | 0.34(3.3, <b>0.06</b> )  | 0.55(0.62, 0.08) | 0.12(1.5)       | 0.36(2.00)       | 0.13(2.1, 0.08)         | 0.41(2.15, 0.14)         |
| 2     | 0.09(1.7)       | 0.35(2.89)       | 0.04(1.6, -0.56)         | 0.36(8.00, 0.03) | 0.23(2.8)       | 0.52(1.26)       | 0.16(1.8, -0.30)        | 0.55(2.44, 0.06)         |
| 3     | 0.07(1.3)       | 0.24(2.43)       | 0.06(1.7, <b>-0.14</b> ) | 0.26(3.33, 0.08) | 0.27(2.1)       | 0.27(0.00)       | 0.27(3.0, <b>0.00</b> ) | 0.37(0.37, 0.37)         |
| 4     | 0.30(2.9)       | 0.50(0.67)       | 0.28(3.3, <b>-0.07</b> ) | 0.54(0.93, 0.08) | 0.01(1.3)       | 0.18(17.00)      | 0.05(2.4, 4.00)         | 0.29(4.80, 0.61)         |
| 5     | 0.23(2.7)       | 0.44(0.91)       | 0.21(3.0, <b>-0.09</b> ) | 0.46(1.19, 0.05) | 0.04(1.4)       | 0.30(6.50)       | 0.04(1.6, 0.00)         | 0.39(8.75, 0.30)         |
| 6     | 0.36(2.5)       | 0.47(0.31)       | 0.24(2.8, -0.33)         | 0.54(1.25, 0.15) | 0.09(1.8)       | 0.31(2.44)       | 0.06(1.6, -0.33)        | 0.35(4.83, 0.13)         |
| 7     | 0.26(2.4)       | 0.49(0.88)       | 0.25(2.4, <b>-0.04</b> ) | 0.55(1.20, 0.12) | 0.19(2.0)       | 0.42(1.21)       | 0.21(2.5, <b>0.11</b> ) | 0.50(1.38, 0.19)         |
| 8     | 0.06(1.7)       | 0.32(4.33)       | 0.07(2.0, <b>0.17</b> )  | 0.35(4.00, 0.09) | 0.14(2.2)       | 0.48(2.43)       | 0.15(1.9, <b>0.07</b> ) | 0.49(2.27, 0.02)         |
| 9     | 0.18(2.3)       | 0.42(1.33)       | 0.22(2.5, 0.22)          | 0.45(1.05, 0.07) | 0.17(2.6)       | 0.45(1.65)       | 0.25(2.1, 0.47)         | 0.48(0.92, 0.07)         |
| 10    | 0.11(2.6)       | 0.42(2.82)       | 0.12(2.8, <b>0.09</b> )  | 0.48(3.00, 0.14) | 0.33(3.3)       | 0.56(0.70)       | 0.25(3.1, -0.24)        | 0.56(1.24, <b>0.00</b> ) |
| 11    | 0.31(2.7)       | 0.54(0.74)       | 0.31(3.0, <b>0.00</b> )  | 0.56(0.81, 0.04) | 0.10(2.1)       | 0.36(2.60)       | 0.11(3.1, <b>0.10</b> ) | 0.41(2.73, 0.14)         |
| 12    | 0.18(2.3)       | 0.43(1.39)       | 0.17(2.6, <b>-0.06</b> ) | 0.50(1.94, 0.16) | 0.07(1.3)       | 0.28(3.00)       | 0.17(3.3, 1.43)         | 0.38(1.24, 0.36)         |
| 13    | 0.19(2.8)       | 0.41(1.16)       | 0.19(2.9, <b>0.00</b> )  | 0.43(1.26, 0.05) | 0.06(2.0)       | 0.26(3.33)       | 0.15(3.5, 1.50)         | 0.35(1.33, 0.35)         |
| 14    | 0.16(2.1)       | 0.31(0.94)       | 0.12(2.3, -0.25)         | 0.35(1.92, 0.13) | 0.10(1.6)       | 0.32(2.20)       | 0.12(1.9, <b>0.20</b> ) | 0.42(2.50, 0.31)         |
| 15    | 0.05(1.4)       | 0.25(4.00)       | 0.08(1.9, <b>0.60</b> )  | 0.30(2.75, 0.20) | 0.16(2.0)       | 0.40(1.50)       | 0.18(2.8, <b>0.12</b> ) | 0.48(1.67, 0.20)         |
| 16    | 0.10(1.9)       | 0.32(2.20)       | 0.07(2.0, -0.30)         | 0.33(3.71, 0.03) | 0.08(1.7)       | 0.36(3.50)       | 0.21(3.2, 1.62)         | 0.45(1.14, 0.25)         |
| 17    | 0.07(1.5)       | 0.32(3.57)       | 0.07(1.2, <b>0.00</b> )  | 0.37(4.29, 0.16) | 0.12(2.0)       | 0.38(2.17)       | 0.23(3.7, 0.92)         | 0.45(0.96, 0.18)         |
| 18    | 0.01(1.0)       | 0.17(16.00)      | 0.03(1.2, <b>2.00</b> )  | 0.21(6.00, 0.24) | 0.33(2.4)       | 0.33(0.00)       | 0.30(2.5, -0.09)        | 0.39(0.30, 0.18)         |
| 19    | 0.25(2.8)       | 0.46(0.84)       | 0.20(2.1, -0.20)         | 0.47(1.35, 0.02) | 0.21(2.1)       | 0.44(1.10)       | 0.29(2.7, 0.38)         | 0.46(0.59, 0.05)         |
| 20    | 0.13(1.9)       | 0.34(1.62)       | 0.05(2.4, -0.62)         | 0.39(6.80, 0.15) | 0.15(2.1)       | 0.43(1.87)       | 0.24(2.7, 0.60)         | 0.46(0.92, 0.07)         |
| 21    | 0.24(2.6)       | 0.47(0.96)       | 0.33(3.4, 0.38)          | 0.54(0.64, 0.15) | 0.21(2.5)       | 0.38(0.81)       | 0.11(2.1, -0.48)        | 0.42(2.82, 0.11)         |
| 22    | 0.21(1.9)       | 0.38(0.81)       | 0.22(2.4, <b>0.05</b> )  | 0.40(0.82, 0.05) | 0.09(1.4)       | 0.35(2.89)       | 0.11(2.0, <b>0.22</b> ) | 0.43(2.91, 0.23)         |
| 23    | 0.21(1.8)       | 0.32(0.52)       | 0.21(2.6, <b>0.00</b> )  | 0.42(1.00, 0.31) | 0.14(2.1)       | 0.38(1.71)       | 0.20(2.9, 0.43)         | 0.42(1.10, 0.11)         |
| 24    | 0.04(1.6)       | 0.26(5.50)       | 0.05(1.8, <b>0.25</b> )  | 0.27(4.40, 0.04) | 0.34(2.2)       | 0.41(0.21)       | 0.38(3.0, 0.12)         | 0.48(0.26, 0.17)         |
| 25    | 0.11(2.0)       | 0.37(2.36)       | 0.15(2.6, 0.36)          | 0.40(1.67, 0.08) | 0.11(1.6)       | 0.29(1.64)       | 0.16(2.4, 0.45)         | 0.34(1.12, 0.17)         |
| Mean  | 0.17(2.1)       | 0.38(1.24)       | 0.16(2.4, -0.04)         | 0.42(1.57, 0.10) | 0.15(2.0)       | 0.37(1.40)       | 0.18(2.6, 0.18)         | 0.43(1.37, 0.16)         |

<sup>a</sup> In parentheses is the number of QTL identified by QP based on the SE model; <sup>b</sup> In parentheses is the gain in prediction accuracy with GWP over QP based on the SE model; <sup>c</sup> The first value in parentheses is the number of QTL identified by QP based on the ME model; and the second one the gain

with ME over SE for QP; <sup>d</sup> The first value in parentheses is the gain in accuracy with GWP over QP based on the ME model; and the second one is the gain with ME over SE using GWP. Bold in parentheses indicates the number is not significant at  $\alpha = 0.05$ .
