# Supplementary material for: Accuracy of Across-Environment Genome-Wide Prediction in Maize Nested Association Mapping Populations
Source: PubMed Central journal article supplement (PMC3564986; doi:10.1534/g3.112.005066), 2013-02-01
Supplement: supp_3.2.263_TableS10.pdf [file supp_3.2.263_TableS10.pdf]

**Table S10 Accuracy of WP prediction for environment E4 with QP and GWP in CV1**

| PopId | LL              |                  |                          |                   | LW              |                  |                          |                          |
|-------|-----------------|------------------|--------------------------|-------------------|-----------------|------------------|--------------------------|--------------------------|
|       | SE              |                  | ME                       |                   | SE              |                  | ME                       |                          |
|       | QP <sup>a</sup> | GWP <sup>b</sup> | QP <sup>c</sup>          | GWP <sup>d</sup>  | QP <sup>a</sup> | GWP <sup>b</sup> | QP <sup>c</sup>          | GWP <sup>d</sup>         |
| 1     | 0.31(2.5)       | 0.47(0.52)       | 0.36(3.3, 0.16)          | 0.51(0.42, 0.09)  | 0.26(2.7)       | 0.50(0.92)       | 0.21(2.1, -0.19)         | 0.54(1.57, 0.08)         |
| 2     | 0.06(1.7)       | 0.30(4.00)       | 0.02(1.6, -0.67)         | 0.32(15.00, 0.07) | 0.22(2.4)       | 0.48(1.18)       | 0.14(1.8, -0.36)         | 0.51(2.64, 0.06)         |
| 3     | 0.08(1.3)       | 0.26(2.25)       | 0.04(1.7, -0.50)         | 0.27(5.75, 0.04)  | 0.29(2.5)       | 0.42(0.45)       | 0.30(3.0, <b>0.03</b> )  | 0.52(0.73, 0.24)         |
| 4     | 0.31(3.0)       | 0.52(0.68)       | 0.32(3.3, <b>0.03</b> )  | 0.56(0.75, 0.08)  | 0.35(2.8)       | 0.51(0.46)       | 0.26(2.4, -0.26)         | 0.54(1.08, 0.06)         |
| 5     | 0.08(1.8)       | 0.35(3.37)       | 0.12(3.0, 0.50)          | 0.39(2.25, 0.11)  | 0.08(2.1)       | 0.45(4.62)       | 0.04(1.6, -0.50)         | 0.47(10.75, 0.04)        |
| 6     | 0.18(2.6)       | 0.45(1.50)       | 0.23(2.8, 0.28)          | 0.51(1.22, 0.13)  | 0.08(1.7)       | 0.30(2.75)       | 0.03(1.6, -0.62)         | 0.36(11.00, 0.20)        |
| 7     | 0.34(2.5)       | 0.60(0.76)       | 0.29(2.4, -0.15)         | 0.62(1.14, 0.03)  | 0.39(3.4)       | 0.62(0.59)       | 0.29(2.5, -0.26)         | 0.65(1.24, 0.05)         |
| 8     | 0.21(2.1)       | 0.40(0.90)       | 0.15(2.0, -0.29)         | 0.43(1.87, 0.07)  | 0.27(2.3)       | 0.40(0.48)       | 0.22(1.9, -0.19)         | 0.45(1.05, 0.12)         |
| 9     | 0.10(1.9)       | 0.34(2.40)       | 0.10(2.5, <b>0.00</b> )  | 0.37(2.70, 0.09)  | 0.34(2.6)       | 0.47(0.38)       | 0.32(2.1, <b>-0.06</b> ) | 0.47(0.47, <b>0.00</b> ) |
| 10    | 0.16(2.4)       | 0.41(1.56)       | 0.15(2.8, <b>-0.06</b> ) | 0.43(1.87, 0.05)  | 0.26(3.2)       | 0.63(1.42)       | 0.24(3.1, <b>-0.08</b> ) | 0.64(1.67, 0.02)         |
| 11    | 0.14(2.1)       | 0.29(1.07)       | 0.25(3.0, 0.79)          | 0.38(0.52, 0.31)  | 0.18(2.6)       | 0.44(1.44)       | 0.23(3.1, 0.28)          | 0.49(1.13, 0.11)         |
| 12    | 0.17(2.7)       | 0.50(1.94)       | 0.18(2.6, <b>0.06</b> )  | 0.54(2.00, 0.08)  | 0.35(3.4)       | 0.57(0.63)       | 0.34(3.3, <b>-0.03</b> ) | 0.60(0.76, 0.05)         |
| 13    | 0.11(1.3)       | 0.24(1.18)       | 0.13(2.9, <b>0.18</b> )  | 0.34(1.62, 0.42)  | 0.17(1.9)       | 0.42(1.47)       | 0.23(3.5, 0.35)          | 0.49(1.13, 0.17)         |
| 14    | 0.08(2.2)       | 0.34(3.25)       | 0.11(2.3, 0.38)          | 0.37(2.36, 0.09)  | 0.25(2.3)       | 0.45(0.80)       | 0.15(1.9, -0.40)         | 0.49(2.27, 0.09)         |
| 15    | 0.20(1.8)       | 0.36(0.80)       | 0.11(1.9, -0.45)         | 0.37(2.36, 0.03)  | 0.30(3.2)       | 0.53(0.77)       | 0.23(2.8, -0.23)         | 0.56(1.43, 0.06)         |
| 16    | 0.07(1.3)       | 0.20(1.86)       | 0.13(2.0, 0.86)          | 0.28(1.15, 0.40)  | 0.29(2.9)       | 0.53(0.83)       | 0.30(3.2, <b>0.03</b> )  | 0.57(0.90, 0.08)         |
| 17    | 0.14(1.8)       | 0.34(1.43)       | 0.06(1.2, -0.57)         | 0.36(5.00, 0.06)  | 0.32(3.3)       | 0.56(0.75)       | 0.34(3.7, <b>0.06</b> )  | 0.61(0.79, 0.09)         |
| 18    | 0.05(1.2)       | 0.26(4.20)       | 0.02(1.2, -0.60)         | 0.28(13.00, 0.08) | 0.20(2.0)       | 0.31(0.55)       | 0.28(2.5, 0.40)          | 0.38(0.36, 0.23)         |
| 19    | 0.06(1.7)       | 0.26(3.33)       | 0.09(2.1, 0.50)          | 0.31(2.44, 0.19)  | 0.42(3.4)       | 0.51(0.21)       | 0.35(2.7, -0.17)         | 0.55(0.57, 0.08)         |
| 20    | 0.13(2.5)       | 0.46(2.54)       | 0.10(2.4, -0.23)         | 0.48(3.80, 0.04)  | 0.49(2.6)       | 0.52(0.06)       | 0.39(2.7, -0.20)         | 0.55(0.41, 0.06)         |
| 21    | 0.37(3.1)       | 0.61(0.65)       | 0.37(3.4, <b>0.00</b> )  | 0.64(0.73, 0.05)  | 0.08(1.8)       | 0.36(3.50)       | 0.05(2.1, -0.38)         | 0.41(7.20, 0.14)         |
| 22    | 0.28(2.2)       | 0.47(0.68)       | 0.23(2.4, -0.18)         | 0.48(1.09, 0.02)  | 0.27(2.8)       | 0.55(1.04)       | 0.19(2.0, -0.30)         | 0.59(2.11, 0.07)         |
| 23    | 0.25(2.0)       | 0.39(0.56)       | 0.22(2.6, <b>-0.12</b> ) | 0.45(1.05, 0.15)  | 0.27(3.0)       | 0.48(0.78)       | 0.27(2.9, <b>0.00</b> )  | 0.51(0.89, 0.06)         |
| 24    | 0.19(1.8)       | 0.26(0.37)       | 0.06(1.8, -0.68)         | 0.29(3.83, 0.12)  | 0.31(3.2)       | 0.47(0.52)       | 0.33(3.0, <b>0.06</b> )  | 0.51(0.55, 0.09)         |
| 25    | 0.04(1.3)       | 0.26(5.50)       | 0.06(2.6, <b>0.50</b> )  | 0.33(4.50, 0.27)  | 0.27(2.4)       | 0.48(0.78)       | 0.28(2.4, <b>0.04</b> )  | 0.47(0.68, -0.02)        |
| Mean  | 0.16(2.0)       | 0.37(1.27)       | 0.16(2.4, 0.00)          | 0.41(1.64, 0.10)  | 0.27(2.7)       | 0.48(0.78)       | 0.24(2.6, -0.10)         | 0.52(1.15, 0.08)         |

<sup>a</sup> In parentheses is the number of QTL identified by QP based on the SE model; <sup>b</sup> In parentheses is the gain in prediction accuracy with GWP over QP based on the SE model; <sup>c</sup> The first value in parentheses is the number of QTL identified by QP based on the ME model; and the second one the gain

with ME over SE for QP; <sup>d</sup> The first value in parentheses is the gain in accuracy with GWP over QP based on the ME model; and the second one is the gain with ME over SE using GWP. Bold in parentheses indicates the number is not significant at  $\alpha = 0.05$ .
