# Supplementary material for: Accuracy of Across-Environment Genome-Wide Prediction in Maize Nested Association Mapping Populations
Source: PubMed Central journal article supplement (PMC3564986; doi:10.1534/g3.112.005066), 2013-02-01
Supplement: supp_3.2.263_TableS11.pdf [file supp_3.2.263_TableS11.pdf]

**Table S11 Accuracy of AP prediction for environment E1 with QP and GWP in CV1**

| PopId | SE              |                     | ME                        |                                    | SE              |                  | ME                        |                                   |
|-------|-----------------|---------------------|---------------------------|------------------------------------|-----------------|------------------|---------------------------|-----------------------------------|
|       | QP <sup>a</sup> | GWP <sup>b</sup>    | QP <sup>c</sup>           | GWP <sup>d</sup>                   | QP <sup>a</sup> | GWP <sup>b</sup> | QP <sup>c</sup>           | GWP <sup>d</sup>                  |
| 1     | 0.21(9.0)       | 0.31(0.48)          | 0.28(14.0, 0.33)          | 0.33(0.18, 0.06)                   | 0.19(13.0)      | 0.25(0.32)       | 0.21(12.0, 0.11)          | 0.26(0.24, 0.04)                  |
| 2     | 0.20(9.0)       | 0.19(-0.05)         | 0.21(14.0, <b>0.05</b> )  | 0.20(-0.05, 0.05)                  | 0.37(13.0)      | 0.42(0.14)       | 0.39(12.0, 0.05)          | 0.42(0.08, <b>0.00</b> )          |
| 3     | 0.21(10.0)      | 0.21( <b>0.00</b> ) | 0.20(15.0, <b>-0.05</b> ) | 0.20( <b>0.00</b> , <b>-0.05</b> ) | 0.41(13.0)      | 0.54(0.32)       | 0.46(11.0, 0.12)          | 0.55(0.20, 0.02)                  |
| 4     | 0.37(12.0)      | 0.41(0.11)          | 0.43(12.0, 0.16)          | 0.41(-0.05, <b>0.00</b> )          | 0.28(14.0)      | 0.29(0.04)       | 0.22(12.0, -0.21)         | 0.28(0.27, -0.03)                 |
| 5     | 0.31(11.0)      | 0.28(-0.10)         | 0.23(14.0, -0.26)         | 0.26(0.13, -0.07)                  | 0.16(13.0)      | 0.23(0.44)       | 0.10(12.0, -0.38)         | 0.24(1.40, 0.04)                  |
| 6     | 0.40(10.0)      | 0.46(0.15)          | 0.46(13.0, 0.15)          | 0.47(0.02, 0.02)                   | 0.36(13.0)      | 0.37(0.03)       | 0.40(12.0, 0.11)          | 0.39(-0.03, 0.05)                 |
| 7     | 0.23(11.0)      | 0.24(0.04)          | 0.27(14.0, 0.17)          | 0.26(-0.04, 0.08)                  | 0.34(12.0)      | 0.36(0.06)       | 0.36(12.0, 0.06)          | 0.39(0.08, 0.08)                  |
| 8     | 0.41(9.0)       | 0.47(0.15)          | 0.44(15.0, 0.07)          | 0.47(0.07, <b>0.00</b> )           | 0.32(12.0)      | 0.39(0.22)       | 0.32(12.0, <b>0.00</b> )  | 0.39(0.22, <b>0.00</b> )          |
| 9     | 0.36(10.0)      | 0.36( <b>0.00</b> ) | 0.33(13.0, -0.08)         | 0.38(0.15, 0.06)                   | 0.18(15.0)      | 0.16(-0.11)      | 0.22(13.0, 0.22)          | 0.17(-0.23, 0.06)                 |
| 10    | 0.30(10.0)      | 0.37(0.23)          | 0.37(13.0, 0.23)          | 0.38(0.03, 0.03)                   | 0.42(12.0)      | 0.46(0.10)       | 0.48(13.0, 0.14)          | 0.48( <b>0.00</b> , 0.04)         |
| 11    | 0.03(10.0)      | 0.07(1.33)          | 0.08(15.0, 1.67)          | 0.09(0.13, 0.29)                   | 0.11(13.0)      | 0.17(0.55)       | 0.19(11.0, 0.73)          | 0.18(-0.05, 0.06)                 |
| 12    | 0.34(9.0)       | 0.39(0.15)          | 0.37(15.0, 0.09)          | 0.40(0.08, 0.03)                   | 0.51(12.0)      | 0.59(0.16)       | 0.54(11.0, 0.06)          | 0.61(0.13, 0.03)                  |
| 13    | 0.28(12.0)      | 0.29(0.04)          | 0.35(13.0, 0.25)          | 0.32(-0.09, 0.10)                  | 0.49(14.0)      | 0.42(-0.14)      | 0.50(12.0, <b>0.02</b> )  | 0.43(-0.14, 0.02)                 |
| 14    | 0.35(10.0)      | 0.40(0.14)          | 0.38(12.0, 0.09)          | 0.40(0.05, <b>0.00</b> )           | 0.39(14.0)      | 0.36(-0.08)      | 0.41(12.0, 0.05)          | 0.38(-0.07, 0.06)                 |
| 15    | 0.22(12.0)      | 0.24(0.09)          | 0.20(15.0, -0.09)         | 0.24(0.20, <b>0.00</b> )           | 0.27(14.0)      | 0.31(0.15)       | 0.23(12.0, -0.15)         | 0.31(0.35, <b>0.00</b> )          |
| 16    | 0.18(11.0)      | 0.27(0.50)          | 0.23(13.0, 0.28)          | 0.28(0.22, 0.04)                   | 0.45(12.0)      | 0.52(0.16)       | 0.49(12.0, 0.09)          | 0.52(0.06, <b>0.00</b> )          |
| 17    | 0.29(11.0)      | 0.29( <b>0.00</b> ) | 0.35(13.0, 0.21)          | 0.30(-0.14, 0.03)                  | 0.38(10.0)      | 0.43(0.13)       | 0.47(13.0, 0.24)          | 0.46(-0.02, 0.07)                 |
| 18    | 0.16(10.0)      | 0.14(-0.13)         | 0.12(13.0, -0.25)         | 0.14(0.17, <b>0.00</b> )           | 0.21(14.0)      | 0.30(0.43)       | 0.30(13.0, 0.43)          | 0.31(0.03, 0.03)                  |
| 19    | 0.29(12.0)      | 0.30(0.03)          | 0.32(15.0, 0.10)          | 0.30(-0.06, <b>0.00</b> )          | 0.21(14.0)      | 0.22(0.05)       | 0.26(12.0, 0.24)          | 0.23(-0.12, 0.05)                 |
| 20    | 0.30(9.0)       | 0.42(0.40)          | 0.35(13.0, 0.17)          | 0.43(0.23, 0.02)                   | 0.40(13.0)      | 0.43(0.07)       | 0.34(13.0, -0.15)         | 0.44(0.29, 0.02)                  |
| 21    | 0.31(10.0)      | 0.33(0.06)          | 0.30(14.0, <b>-0.03</b> ) | 0.35(0.17, 0.06)                   | 0.24(13.0)      | 0.32(0.33)       | 0.33(12.0, 0.38)          | 0.34(0.03, 0.06)                  |
| 22    | 0.29(10.0)      | 0.35(0.21)          | 0.31(17.0, 0.07)          | 0.34(0.10, -0.03)                  | 0.24(13.0)      | 0.29(0.21)       | 0.22(12.0, -0.08)         | 0.30(0.36, 0.03)                  |
| 23    | 0.16(9.0)       | 0.21(0.31)          | 0.16(14.0, <b>0.00</b> )  | 0.20(0.25, -0.05)                  | 0.13(14.0)      | 0.15(0.15)       | 0.23(12.0, 0.77)          | 0.18(-0.22, 0.20)                 |
| 24    | 0.18(11.0)      | 0.27(0.50)          | 0.17(15.0, <b>-0.06</b> ) | 0.25(0.47, -0.07)                  | 0.42(12.0)      | 0.45(0.07)       | 0.45(12.0, 0.07)          | 0.45( <b>0.00</b> , <b>0.00</b> ) |
| 25    | 0.35(12.0)      | 0.42(0.20)          | 0.41(15.0, 0.17)          | 0.42(0.02, <b>0.00</b> )           | 0.41(14.0)      | 0.47(0.15)       | 0.40(13.0, <b>-0.02</b> ) | 0.47(0.18, <b>0.00</b> )          |
| Mean  | 0.27(10.4)      | 0.31(0.15)          | 0.29(14.0, 0.09)          | 0.31(0.07, 0.00)                   | 0.32(13.0)      | 0.36(0.13)       | 0.34(12.1, 0.08)          | 0.37(0.09, 0.04)                  |

<sup>a</sup> In parentheses is the number of QTL identified by QP based on the SE model; <sup>b</sup> In parentheses is the gain in prediction accuracy with GWP over QP based on the SE model; <sup>c</sup> The first value in parentheses is the number of QTL identified by QP based on the ME model; and the second one the gain

with ME over SE for QP; <sup>d</sup> The first value in parentheses is the gain in accuracy with GWP over QP based on the ME model; and the second one is the gain with ME over SE using GWP. Bold in parentheses indicates the number is not significant at  $\alpha = 0.05$ .
