# Supplementary material for: Accuracy of Across-Environment Genome-Wide Prediction in Maize Nested Association Mapping Populations
Source: PubMed Central journal article supplement (PMC3564986; doi:10.1534/g3.112.005066), 2013-02-01
Supplement: supp_3.2.263_TableS12.pdf [file supp_3.2.263_TableS12.pdf]

**Table S12 Accuracy of AP prediction for environment E2 with QP and GWP in CV1**

| PopId | LL              |                     |                          |                                   | LW              |                     |                           |                            |
|-------|-----------------|---------------------|--------------------------|-----------------------------------|-----------------|---------------------|---------------------------|----------------------------|
|       | SE              |                     | ME                       |                                   | SE              |                     | ME                        |                            |
|       | QP <sup>a</sup> | GWP <sup>b</sup>    | QP <sup>c</sup>          | GWP <sup>d</sup>                  | QP <sup>a</sup> | GWP <sup>b</sup>    | QP <sup>c</sup>           | GWP <sup>d</sup>           |
| 1     | 0.27(12.0)      | 0.39(0.44)          | 0.34(14.0, 0.26)         | 0.38(0.12, -0.03)                 | 0.13(11.0)      | 0.21(0.62)          | 0.22(12.0, 0.69)          | 0.24(0.09, 0.14)           |
| 2     | 0.27(13.0)      | 0.28(0.04)          | 0.26(14.0, -0.04)        | 0.29(0.12, 0.04)                  | 0.31(11.0)      | 0.44(0.42)          | 0.35(12.0, 0.13)          | 0.45(0.29, 0.02)           |
| 3     | 0.21(15.0)      | 0.29(0.38)          | 0.28(15.0, 0.33)         | 0.28( <b>0.00</b> , -0.03)        | 0.42(15.0)      | 0.54(0.29)          | 0.51(11.0, 0.21)          | 0.54(0.06, <b>0.00</b> )   |
| 4     | 0.32(14.0)      | 0.38(0.19)          | 0.34(12.0, 0.06)         | 0.39(0.15, 0.03)                  | 0.31(13.0)      | 0.34(0.10)          | 0.28(12.0, -0.10)         | 0.36(0.29, 0.06)           |
| 5     | 0.27(12.0)      | 0.33(0.22)          | 0.25(14.0, -0.07)        | 0.32(0.28, -0.03)                 | 0.37(12.0)      | 0.47(0.27)          | 0.38(12.0, <b>0.03</b> )  | 0.48(0.26, 0.02)           |
| 6     | 0.42(14.0)      | 0.47(0.12)          | 0.42(13.0, <b>0.00</b> ) | 0.47(0.12, <b>0.00</b> )          | 0.30(13.0)      | 0.28(-0.07)         | 0.32(12.0, 0.07)          | 0.30(-0.06, 0.07)          |
| 7     | 0.21(12.0)      | 0.20(-0.05)         | 0.19(14.0, -0.10)        | 0.21(0.11, 0.05)                  | 0.50(11.0)      | 0.60(0.20)          | 0.47(12.0, -0.06)         | 0.59(0.26, -0.02)          |
| 8     | 0.34(13.0)      | 0.25(-0.26)         | 0.34(15.0, <b>0.00</b> ) | 0.26(-0.24, 0.04)                 | 0.29(13.0)      | 0.34(0.17)          | 0.30(12.0, 0.03)          | 0.35(0.17, 0.03)           |
| 9     | 0.23(13.0)      | 0.23( <b>0.00</b> ) | 0.28(13.0, 0.22)         | 0.22(-0.21, -0.04)                | 0.31(13.0)      | 0.34(0.10)          | 0.33(13.0, 0.06)          | 0.34(0.03, <b>0.00</b> )   |
| 10    | 0.42(13.0)      | 0.47(0.12)          | 0.43(13.0, 0.02)         | 0.47(0.09, <b>0.00</b> )          | 0.33(14.0)      | 0.41(0.24)          | 0.42(13.0, 0.27)          | 0.45(0.07, 0.10)           |
| 11    | 0.24(15.0)      | 0.29(0.21)          | 0.28(15.0, 0.17)         | 0.30(0.07, 0.03)                  | 0.34(13.0)      | 0.37(0.09)          | 0.36(11.0, 0.06)          | 0.37(0.03, <b>0.00</b> )   |
| 12    | 0.36(13.0)      | 0.41(0.14)          | 0.41(15.0, 0.14)         | 0.41( <b>0.00</b> , <b>0.00</b> ) | 0.51(13.0)      | 0.62(0.22)          | 0.55(11.0, 0.08)          | 0.63(0.15, 0.02)           |
| 13    | 0.37(12.0)      | 0.35(-0.05)         | 0.28(13.0, -0.24)        | 0.35(0.25, <b>0.00</b> )          | 0.42(13.0)      | 0.41(-0.02)         | 0.42(12.0, <b>0.00</b> )  | 0.4(-0.05, -0.02)          |
| 14    | 0.31(13.0)      | 0.24(-0.23)         | 0.26(12.0, -0.16)        | 0.26( <b>0.00</b> , 0.08)         | 0.37(13.0)      | 0.37( <b>0.00</b> ) | 0.38(12.0, 0.03)          | 0.39(0.03, 0.05)           |
| 15    | 0.24(13.0)      | 0.30(0.25)          | 0.20(15.0, -0.17)        | 0.29(0.45, -0.03)                 | 0.46(12.0)      | 0.53(0.15)          | 0.48(12.0, 0.04)          | 0.52(0.08, -0.02)          |
| 16    | 0.33(12.0)      | 0.42(0.27)          | 0.27(13.0, -0.18)        | 0.42(0.56, <b>0.00</b> )          | 0.47(13.0)      | 0.53(0.13)          | 0.50(12.0, 0.06)          | 0.54(0.08, 0.02)           |
| 17    | 0.07(16.0)      | 0.11(0.57)          | 0.12(13.0, 0.71)         | 0.12( <b>0.00</b> , 0.09)         | 0.57(12.0)      | 0.60(0.05)          | 0.58(13.0, 0.02)          | 0.59(0.02, -0.02)          |
| 18    | 0.13(14.0)      | 0.20(0.54)          | 0.09(13.0, -0.31)        | 0.19(1.11, -0.05)                 | 0.21(13.0)      | 0.23(0.10)          | 0.22(13.0, <b>0.05</b> )  | 0.22( <b>0.00</b> , -0.04) |
| 19    | 0.36(12.0)      | 0.39(0.08)          | 0.43(15.0, 0.19)         | 0.40(-0.07, 0.03)                 | 0.40(12.0)      | 0.40( <b>0.00</b> ) | 0.39(12.0, <b>-0.03</b> ) | 0.39( <b>0.00</b> , -0.03) |
| 20    | 0.27(12.0)      | 0.41(0.52)          | 0.30(13.0, 0.11)         | 0.41(0.37, <b>0.00</b> )          | 0.39(13.0)      | 0.44(0.13)          | 0.32(13.0, -0.18)         | 0.43(0.34, -0.02)          |
| 21    | 0.43(12.0)      | 0.47(0.09)          | 0.37(14.0, -0.14)        | 0.47(0.27, <b>0.00</b> )          | 0.40(12.0)      | 0.45(0.13)          | 0.40(12.0, <b>0.00</b> )  | 0.45(0.13, <b>0.00</b> )   |
| 22    | 0.41(13.0)      | 0.43(0.05)          | 0.37(17.0, -0.10)        | 0.43(0.16, <b>0.00</b> )          | 0.37(14.0)      | 0.40(0.08)          | 0.39(12.0, 0.05)          | 0.42(0.08, 0.05)           |
| 23    | 0.28(13.0)      | 0.35(0.25)          | 0.25(14.0, -0.11)        | 0.35(0.40, <b>0.00</b> )          | 0.38(12.0)      | 0.38( <b>0.00</b> ) | 0.40(12.0, 0.05)          | 0.40( <b>0.00</b> , 0.05)  |
| 24    | 0.15(14.0)      | 0.21(0.40)          | 0.20(15.0, 0.33)         | 0.21(0.05, <b>0.00</b> )          | 0.42(15.0)      | 0.45(0.07)          | 0.46(12.0, 0.10)          | 0.45(-0.02, <b>0.00</b> )  |
| 25    | 0.18(13.0)      | 0.24(0.33)          | 0.18(15.0, <b>0.00</b> ) | 0.24(0.33, <b>0.00</b> )          | 0.25(13.0)      | 0.35(0.40)          | 0.31(13.0, 0.24)          | 0.37(0.19, 0.06)           |
| Mean  | 0.28(13.1)      | 0.32(0.14)          | 0.29(14.0, 0.01)         | 0.33(0.14, 0.01)                  | 0.37(12.8)      | 0.42(0.14)          | 0.39(12.1, 0.06)          | 0.43(0.10, 0.02)           |

<sup>a</sup> In parentheses is the number of QTL identified by QP based on the SE model; <sup>b</sup> In parentheses is the gain in prediction accuracy with GWP over QP based on the SE model; <sup>c</sup> The first value in parentheses is the number of QTL identified by QP based on the ME model; and the second one the gain

with ME over SE for QP; <sup>d</sup> The first value in parentheses is the gain in accuracy with GWP over QP based on the ME model; and the second one is the gain with ME over SE using GWP. Bold in parentheses indicates the number is not significant at  $\alpha = 0.05$ .
