# Supplementary material for: Accuracy of Across-Environment Genome-Wide Prediction in Maize Nested Association Mapping Populations
Source: PubMed Central journal article supplement (PMC3564986; doi:10.1534/g3.112.005066), 2013-02-01
Supplement: supp_3.2.263_TableS13.pdf [file supp_3.2.263_TableS13.pdf]

**Table S13 Accuracy of AP prediction for environment E3 with QP and GWP in CV1**

| PopId | LL              |                     |                           |                           | LW              |                     |                          |                           |
|-------|-----------------|---------------------|---------------------------|---------------------------|-----------------|---------------------|--------------------------|---------------------------|
|       | SE              |                     | ME                        |                           | SE              |                     | ME                       |                           |
|       | QP <sup>a</sup> | GWP <sup>b</sup>    | QP <sup>c</sup>           | GWP <sup>d</sup>          | QP <sup>a</sup> | GWP <sup>b</sup>    | QP <sup>c</sup>          | GWP <sup>d</sup>          |
| 1     | 0.31(12.0)      | 0.37(0.19)          | 0.25(14.0, -0.19)         | 0.37(0.48, <b>0.00</b> )  | 0.24(10.0)      | 0.24( <b>0.00</b> ) | 0.27(12.0, 0.13)         | 0.25(-0.07, 0.04)         |
| 2     | 0.26(13.0)      | 0.27(0.04)          | 0.27(14.0, 0.04)          | 0.30(0.11, 0.11)          | 0.38(12.0)      | 0.46(0.21)          | 0.43(12.0, 0.13)         | 0.47(0.09, 0.02)          |
| 3     | 0.15(14.0)      | 0.22(0.47)          | 0.13(15.0, -0.13)         | 0.21(0.62, -0.05)         | 0.31(11.0)      | 0.37(0.19)          | 0.34(11.0, 0.10)         | 0.36(0.06, -0.03)         |
| 4     | 0.30(12.0)      | 0.42(0.40)          | 0.34(12.0, 0.13)          | 0.41(0.21, -0.02)         | 0.22(11.0)      | 0.22( <b>0.00</b> ) | 0.18(12.0, -0.18)        | 0.24(0.33, 0.09)          |
| 5     | 0.22(13.0)      | 0.20(-0.09)         | 0.17(14.0, -0.23)         | 0.21(0.24, 0.05)          | 0.37(10.0)      | 0.44(0.19)          | 0.37(12.0, <b>0.00</b> ) | 0.43(0.16, -0.02)         |
| 6     | 0.41(13.0)      | 0.47(0.15)          | 0.40(13.0, -0.02)         | 0.46(0.15, -0.02)         | 0.21(9.0)       | 0.26(0.24)          | 0.26(12.0, 0.24)         | 0.26( <b>0.00, 0.00</b> ) |
| 7     | 0.21(13.0)      | 0.20(-0.05)         | 0.18(14.0, -0.14)         | 0.20(0.11, <b>0.00</b> )  | 0.21(8.0)       | 0.32(0.52)          | 0.27(12.0, 0.29)         | 0.33(0.22, 0.03)          |
| 8     | 0.27(14.0)      | 0.29(0.07)          | 0.35(15.0, 0.30)          | 0.29(-0.17, <b>0.00</b> ) | 0.23(11.0)      | 0.27(0.17)          | 0.26(12.0, 0.13)         | 0.28(0.08, 0.04)          |
| 9     | 0.25(13.0)      | 0.35(0.40)          | 0.34(13.0, 0.36)          | 0.36(0.06, 0.03)          | 0.31(10.0)      | 0.31( <b>0.00</b> ) | 0.32(13.0, 0.03)         | 0.30(-0.06, -0.03)        |
| 10    | 0.36(12.0)      | 0.47(0.31)          | 0.35(13.0, <b>-0.03</b> ) | 0.46(0.31, -0.02)         | 0.41(9.0)       | 0.56(0.37)          | 0.38(13.0, -0.07)        | 0.55(0.45, -0.02)         |
| 11    | 0.16(13.0)      | 0.22(0.38)          | 0.11(15.0, -0.31)         | 0.23(1.09, 0.05)          | 0.17(10.0)      | 0.26(0.53)          | 0.19(11.0, 0.12)         | 0.27(0.42, 0.04)          |
| 12    | 0.20(13.0)      | 0.32(0.60)          | 0.24(15.0, 0.20)          | 0.31(0.29, -0.03)         | 0.22(12.0)      | 0.34(0.55)          | 0.31(11.0, 0.41)         | 0.34(0.10, <b>0.00</b> )  |
| 13    | 0.39(13.0)      | 0.36(-0.08)         | 0.40(13.0, <b>0.03</b> )  | 0.39(-0.03, 0.08)         | 0.45(10.0)      | 0.4(-0.11)          | 0.45(12.0, <b>0.00</b> ) | 0.38(-0.16, -0.05)        |
| 14    | 0.19(13.0)      | 0.24(0.26)          | 0.17(12.0, -0.11)         | 0.24(0.41, <b>0.00</b> )  | 0.24(10.0)      | 0.26(0.08)          | 0.30(12.0, 0.25)         | 0.28(-0.07, 0.08)         |
| 15    | 0.20(13.0)      | 0.24(0.20)          | 0.18(15.0, -0.10)         | 0.25(0.39, 0.04)          | 0.44(9.0)       | 0.49(0.11)          | 0.45(12.0, 0.02)         | 0.50(0.11, 0.02)          |
| 16    | 0.16(12.0)      | 0.16( <b>0.00</b> ) | 0.16(13.0, <b>0.00</b> )  | 0.17(0.06, 0.06)          | 0.38(11.0)      | 0.46(0.21)          | 0.43(12.0, 0.13)         | 0.49(0.14, 0.07)          |
| 17    | 0.26(14.0)      | 0.29(0.12)          | 0.29(13.0, 0.12)          | 0.29( <b>0.00, 0.00</b> ) | 0.26(10.0)      | 0.30(0.15)          | 0.28(13.0, 0.08)         | 0.33(0.18, 0.10)          |
| 18    | 0.06(13.0)      | 0.11(0.83)          | 0.17(13.0, 1.83)          | 0.13(-0.24, 0.18)         | 0.29(9.0)       | 0.32(0.10)          | 0.34(13.0, 0.17)         | 0.33(-0.03, 0.03)         |
| 19    | 0.39(13.0)      | 0.36(-0.08)         | 0.39(15.0, <b>0.00</b> )  | 0.35(-0.10, -0.03)        | 0.36(10.0)      | 0.29(-0.19)         | 0.35(12.0, -0.03)        | 0.30(-0.14, 0.03)         |
| 20    | 0.23(12.0)      | 0.36(0.57)          | 0.24(13.0, <b>0.04</b> )  | 0.38(0.58, 0.06)          | 0.39(12.0)      | 0.44(0.13)          | 0.41(13.0, 0.05)         | 0.46(0.12, 0.05)          |
| 21    | 0.26(13.0)      | 0.44(0.69)          | 0.32(14.0, 0.23)          | 0.46(0.44, 0.05)          | 0.38(9.0)       | 0.40(0.05)          | 0.40(12.0, 0.05)         | 0.41(0.02, 0.02)          |
| 22    | 0.22(13.0)      | 0.20(-0.09)         | 0.30(17.0, 0.36)          | 0.21(-0.30, 0.05)         | 0.20(11.0)      | 0.26(0.30)          | 0.25(12.0, 0.25)         | 0.26(0.04, <b>0.00</b> )  |
| 23    | 0.19(13.0)      | 0.22(0.16)          | 0.21(14.0, 0.11)          | 0.23(0.10, 0.05)          | 0.19(10.0)      | 0.27(0.42)          | 0.23(12.0, 0.21)         | 0.28(0.22, 0.04)          |
| 24    | 0.13(11.0)      | 0.19(0.46)          | 0.14(15.0, <b>0.08</b> )  | 0.19(0.36, <b>0.00</b> )  | 0.39(11.0)      | 0.36(-0.08)         | 0.41(12.0, 0.05)         | 0.38(-0.07, 0.06)         |
| 25    | 0.30(13.0)      | 0.39(0.30)          | 0.25(15.0, -0.17)         | 0.38(0.52, -0.03)         | 0.20(12.0)      | 0.24(0.20)          | 0.24(13.0, 0.20)         | 0.24( <b>0.00, 0.00</b> ) |
| Mean  | 0.24(12.8)      | 0.29(0.21)          | 0.25(14.0, 0.04)          | 0.30(0.20, 0.01)          | 0.30(10.3)      | 0.34(0.13)          | 0.32(12.1, 0.09)         | 0.35(0.09, 0.03)          |

<sup>a</sup> In parentheses is the number of QTL identified by QP based on the SE model; <sup>b</sup> In parentheses is the gain in prediction accuracy with GWP over QP based on the SE model; <sup>c</sup> The first value in parentheses is the number of QTL identified by QP based on the ME model; and the second one the gain

with ME over SE for QP; <sup>d</sup> The first value in parentheses is the gain in accuracy with GWP over QP based on the ME model; and the second one is the gain with ME over SE using GWP. Bold in parentheses indicates the number is not significant at  $\alpha = 0.05$ .
