# Supplementary material for: Accuracy of Across-Environment Genome-Wide Prediction in Maize Nested Association Mapping Populations
Source: PubMed Central journal article supplement (PMC3564986; doi:10.1534/g3.112.005066), 2013-02-01
Supplement: supp_3.2.263_TableS14.pdf [file supp_3.2.263_TableS14.pdf]

**Table S14 Accuracy of AP prediction for environment E4 with QP and GWP in CV1**

| PopId | LL              |                     |                          |                           | LW              |                  |                          |                                   |
|-------|-----------------|---------------------|--------------------------|---------------------------|-----------------|------------------|--------------------------|-----------------------------------|
|       | SE              |                     | ME                       |                           | SE              |                  | ME                       |                                   |
|       | QP <sup>a</sup> | GWP <sup>b</sup>    | QP <sup>c</sup>          | GWP <sup>d</sup>          | QP <sup>a</sup> | GWP <sup>b</sup> | QP <sup>c</sup>          | GWP <sup>d</sup>                  |
| 1     | 0.25(15.0)      | 0.26(0.04)          | 0.18(14.0, -0.28)        | 0.27(0.5, 0.04)           | 0.26(13.0)      | 0.31(0.19)       | 0.30(12.0, 0.15)         | 0.31(0.03, <b>0.00</b> )          |
| 2     | 0.28(15.0)      | 0.25(-0.11)         | 0.19(14.0, -0.32)        | 0.23(0.21, -0.08)         | 0.39(13.0)      | 0.43(0.10)       | 0.39(12.0, <b>0.00</b> ) | 0.43(0.10, <b>0.00</b> )          |
| 3     | 0.25(17.0)      | 0.24(-0.04)         | 0.15(15.0, -0.40)        | 0.25(0.67, 0.04)          | 0.38(12.0)      | 0.39(0.03)       | 0.35(11.0, -0.08)        | 0.40(0.14, 0.03)                  |
| 4     | 0.40(13.0)      | 0.42(0.05)          | 0.36(12.0, -0.10)        | 0.43(0.19, 0.02)          | 0.25(13.0)      | 0.29(0.16)       | 0.26(12.0, <b>0.04</b> ) | 0.29(0.12, <b>0.00</b> )          |
| 5     | 0.23(15.0)      | 0.38(0.65)          | 0.23(14.0, <b>0.00</b> ) | 0.38(0.65, <b>0.00</b> )  | 0.31(13.0)      | 0.33(0.06)       | 0.29(12.0, -0.06)        | 0.36(0.24, 0.09)                  |
| 6     | 0.35(15.0)      | 0.46(0.31)          | 0.42(13.0, 0.20)         | 0.48(0.14, 0.04)          | 0.27(13.0)      | 0.33(0.22)       | 0.29(12.0, 0.07)         | 0.33(0.14, <b>0.00</b> )          |
| 7     | 0.16(13.0)      | 0.32(1.00)          | 0.19(14.0, 0.19)         | 0.31(0.63, -0.03)         | 0.45(12.0)      | 0.52(0.16)       | 0.47(12.0, 0.04)         | 0.53(0.13, 0.02)                  |
| 8     | 0.33(14.0)      | 0.34(0.03)          | 0.38(15.0, 0.15)         | 0.35(-0.08, 0.03)         | 0.26(12.0)      | 0.39(0.50)       | 0.30(12.0, 0.15)         | 0.40(0.33, 0.03)                  |
| 9     | 0.34(15.0)      | 0.35(0.03)          | 0.32(13.0, -0.06)        | 0.36(0.13, 0.03)          | 0.34(13.0)      | 0.40(0.18)       | 0.35(13.0, 0.03)         | 0.41(0.17, 0.02)                  |
| 10    | 0.40(16.0)      | 0.46(0.15)          | 0.34(13.0, -0.15)        | 0.48(0.41, 0.04)          | 0.47(13.0)      | 0.53(0.13)       | 0.47(13.0, <b>0.00</b> ) | 0.54(0.15, 0.02)                  |
| 11    | 0.22(13.0)      | 0.27(0.23)          | 0.17(15.0, -0.23)        | 0.27(0.59, <b>0.00</b> )  | 0.35(12.0)      | 0.36(0.03)       | 0.34(11.0, -0.03)        | 0.36(0.06, <b>0.00</b> )          |
| 12    | 0.31(12.0)      | 0.31(0.00)          | 0.34(15.0, 0.10)         | 0.34( <b>0.00</b> , 0.10) | 0.56(12.0)      | 0.57(0.02)       | 0.54(11.0, -0.04)        | 0.58(0.07, 0.02)                  |
| 13    | 0.25(14.0)      | 0.16(-0.36)         | 0.20(13.0, -0.20)        | 0.16(-0.20, <b>0.00</b> ) | 0.32(13.0)      | 0.32(0.00)       | 0.37(12.0, 0.16)         | 0.35(-0.05, 0.09)                 |
| 14    | 0.29(13.0)      | 0.35(0.21)          | 0.18(12.0, -0.38)        | 0.33(0.83, -0.06)         | 0.32(13.0)      | 0.33(0.03)       | 0.36(12.0, 0.12)         | 0.33(-0.08, <b>0.00</b> )         |
| 15    | 0.10(12.0)      | 0.20(1.00)          | 0.15(15.0, 0.50)         | 0.21(0.40, 0.05)          | 0.58(13.0)      | 0.60(0.03)       | 0.57(12.0, -0.02)        | 0.60(0.05, <b>0.00</b> )          |
| 16    | 0.17(12.0)      | 0.23(0.35)          | 0.15(13.0, -0.12)        | 0.24(0.60, 0.04)          | 0.47(12.0)      | 0.57(0.21)       | 0.52(12.0, 0.11)         | 0.58(0.12, 0.02)                  |
| 17    | 0.15(16.0)      | 0.25(0.67)          | 0.12(13.0, -0.20)        | 0.24(1.00, -0.04)         | 0.55(13.0)      | 0.53(-0.04)      | 0.53(13.0, -0.04)        | 0.53( <b>0.00</b> , <b>0.00</b> ) |
| 18    | 0.13(14.0)      | 0.13( <b>0.00</b> ) | 0.16(13.0, 0.23)         | 0.13(-0.19, <b>0.00</b> ) | 0.40(13.0)      | 0.38(-0.05)      | 0.39(13.0, -0.03)        | 0.38(-0.03, <b>0.00</b> )         |
| 19    | 0.21(14.0)      | 0.19(-0.10)         | 0.22(15.0, <b>0.05</b> ) | 0.19(-0.14, <b>0.00</b> ) | 0.38(13.0)      | 0.36(-0.05)      | 0.43(12.0, 0.13)         | 0.36(-0.16, <b>0.00</b> )         |
| 20    | 0.30(12.0)      | 0.41(0.37)          | 0.33(13.0, 0.10)         | 0.41(0.24, <b>0.00</b> )  | 0.44(12.0)      | 0.52(0.18)       | 0.42(13.0, -0.05)        | 0.52(0.24, <b>0.00</b> )          |
| 21    | 0.45(14.0)      | 0.52(0.16)          | 0.42(14.0, -0.07)        | 0.52(0.24, <b>0.00</b> )  | 0.37(13.0)      | 0.41(0.11)       | 0.43(12.0, 0.16)         | 0.44(0.02, 0.07)                  |
| 22    | 0.20(14.0)      | 0.25(0.25)          | 0.21(17.0, <b>0.05</b> ) | 0.24(0.14, -0.04)         | 0.31(12.0)      | 0.40(0.29)       | 0.31(12.0, <b>0.00</b> ) | 0.40(0.29, <b>0.00</b> )          |
| 23    | 0.13(17.0)      | 0.13( <b>0.00</b> ) | 0.10(14.0, -0.23)        | 0.13(0.30, <b>0.00</b> )  | 0.29(13.0)      | 0.30(0.03)       | 0.32(12.0, 0.10)         | 0.30(-0.06, <b>0.00</b> )         |
| 24    | 0.18(14.0)      | 0.29(0.61)          | 0.14(15.0, -0.22)        | 0.28(1.00, -0.03)         | 0.48(13.0)      | 0.50(0.04)       | 0.53(12.0, 0.10)         | 0.50(-0.06, <b>0.00</b> )         |
| 25    | 0.19(11.0)      | 0.29(0.53)          | 0.18(15.0, -0.05)        | 0.30(0.67, 0.03)          | 0.36(13.0)      | 0.44(0.22)       | 0.32(13.0, -0.11)        | 0.43(0.34, -0.02)                 |
| Mean  | 0.25(14.0)      | 0.30(0.20)          | 0.23(14.0, -0.07)        | 0.30(0.30, 0.00)          | 0.38(12.7)      | 0.42(0.11)       | 0.39(12.1, 0.03)         | 0.43(0.10, 0.01)                  |

<sup>a</sup> In parentheses is the number of QTL identified by QP based on the SE model; <sup>b</sup> In parentheses is the gain in prediction accuracy with GWP over QP based on the SE model; <sup>c</sup> The first value in parentheses is the number of QTL identified by QP based on the ME model; and the second one the gain

with ME over SE for QP; <sup>d</sup> The first value in parentheses is the gain in accuracy with GWP over QP based on the ME model; and the second one is the gain with ME over SE using GWP. Bold in parentheses indicates the number is not significant at  $\alpha = 0.05$ .
