# Supplementary material for: Accuracy of Across-Environment Genome-Wide Prediction in Maize Nested Association Mapping Populations
Source: PubMed Central journal article supplement (PMC3564986; doi:10.1534/g3.112.005066), 2013-02-01
Supplement: supp_3.2.263_TableS15.pdf [file supp_3.2.263_TableS15.pdf]

**Table S15 Accuracy of WP prediction for environment E1 with QP and GWP in CV2**

| PopId | LL              |                  |                          |                  | LW              |                  |                          |                  |
|-------|-----------------|------------------|--------------------------|------------------|-----------------|------------------|--------------------------|------------------|
|       | SE              |                  | ME                       |                  | SE              |                  | ME                       |                  |
|       | QP <sup>a</sup> | GWP <sup>b</sup> | QP <sup>c</sup>          | GWP <sup>d</sup> | QP <sup>a</sup> | GWP <sup>b</sup> | QP <sup>c</sup>          | GWP <sup>d</sup> |
| 1     | 0.23(1.6)       | 0.33(0.43)       | 0.41(3.4, 0.78)          | 0.45(0.10, 0.36) | 0.06(1.3)       | 0.31(4.17)       | 0.18(1.6, 2.00)          | 0.49(1.72, 0.58) |
| 2     | 0.03(1.1)       | 0.18(5.00)       | 0.06(0.8, 1.00)          | 0.42(6.00, 1.33) | 0.21(2.0)       | 0.40(0.90)       | 0.24(1.8, <b>0.14</b> )  | 0.55(1.29, 0.38) |
| 3     | 0.09(1.2)       | 0.26(1.89)       | 0.06(0.8, <b>-0.33</b> ) | 0.37(5.17, 0.42) | 0.39(3.3)       | 0.56(0.44)       | 0.43(2.6, 0.10)          | 0.68(0.58, 0.21) |
| 4     | 0.24(2.8)       | 0.49(1.04)       | 0.34(3.2, 0.42)          | 0.60(0.76, 0.22) | 0.23(2.4)       | 0.50(1.17)       | 0.23(1.6, <b>0.00</b> )  | 0.61(1.65, 0.22) |
| 5     | 0.14(1.8)       | 0.33(1.36)       | 0.31(1.9, 1.21)          | 0.54(0.74, 0.64) | 0.06(1.3)       | 0.21(2.50)       | 0.10(0.9, 0.67)          | 0.46(3.60, 1.19) |
| 6     | 0.25(2.4)       | 0.50(1.00)       | 0.31(2.3, 0.24)          | 0.59(0.90, 0.18) | 0.02(1.6)       | 0.31(14.50)      | 0.05(1.0, 1.50)          | 0.43(7.60, 0.39) |
| 7     | 0.34(2.6)       | 0.52(0.53)       | 0.38(1.9, 0.12)          | 0.67(0.76, 0.29) | 0.23(2.5)       | 0.48(1.09)       | 0.29(1.9, 0.26)          | 0.61(1.10, 0.27) |
| 8     | 0.07(1.7)       | 0.28(3.00)       | 0.19(1.7, 1.71)          | 0.51(1.68, 0.82) | 0.07(1.5)       | 0.30(3.29)       | 0.28(2.2, 3.00)          | 0.49(0.75, 0.63) |
| 9     | 0.30(2.1)       | 0.35(0.17)       | 0.31(1.7, <b>0.03</b> )  | 0.50(0.61, 0.43) | 0.02(1.0)       | 0.18(8.00)       | 0.21(1.7, 9.50)          | 0.42(1.00, 1.33) |
| 10    | 0.26(2.5)       | 0.46(0.77)       | 0.32(2.1, 0.23)          | 0.64(1.00, 0.39) | 0.15(2.2)       | 0.37(1.47)       | 0.27(2.4, 0.80)          | 0.62(1.30, 0.68) |
| 11    | 0.30(2.5)       | 0.40(0.33)       | 0.41(2.6, 0.37)          | 0.56(0.37, 0.40) | 0.12(2.3)       | 0.40(2.33)       | 0.16(1.7, 0.33)          | 0.48(2.00, 0.20) |
| 12    | 0.25(3.0)       | 0.50(1.00)       | 0.33(2.9, 0.32)          | 0.65(0.97, 0.30) | 0.30(3.1)       | 0.54(0.80)       | 0.40(2.8, 0.33)          | 0.64(0.60, 0.19) |
| 13    | 0.21(2.7)       | 0.45(1.14)       | 0.27(1.6, 0.29)          | 0.64(1.37, 0.42) | 0.30(2.6)       | 0.49(0.63)       | 0.33(1.7, <b>0.10</b> )  | 0.61(0.85, 0.24) |
| 14    | 0.10(2.0)       | 0.36(2.60)       | 0.21(1.6, 1.10)          | 0.55(1.62, 0.53) | 0.20(2.3)       | 0.44(1.20)       | 0.22(1.4, <b>0.10</b> )  | 0.62(1.82, 0.41) |
| 15    | 0.08(1.7)       | 0.28(2.50)       | 0.17(1.4, 1.12)          | 0.47(1.76, 0.68) | 0.13(1.7)       | 0.30(1.31)       | 0.25(2.5, 0.92)          | 0.43(0.72, 0.43) |
| 16    | 0.20(1.7)       | 0.34(0.70)       | 0.23(1.2, 0.15)          | 0.48(1.09, 0.41) | 0.25(2.3)       | 0.45(0.80)       | 0.38(2.7, 0.52)          | 0.56(0.47, 0.24) |
| 17    | 0.05(1.2)       | 0.27(4.40)       | 0.09(0.8, 0.80)          | 0.39(3.33, 0.44) | 0.32(3.0)       | 0.55(0.72)       | 0.43(3.5, 0.34)          | 0.68(0.58, 0.24) |
| 18    | 0.10(1.4)       | 0.27(1.70)       | 0.06(0.6, -0.40)         | 0.36(5.00, 0.33) | 0.19(2.0)       | 0.40(1.11)       | 0.22(1.6, <b>0.16</b> )  | 0.47(1.14, 0.17) |
| 19    | 0.27(2.2)       | 0.37(0.37)       | 0.21(1.5, -0.22)         | 0.52(1.48, 0.41) | 0.28(2.3)       | 0.41(0.46)       | 0.37(2.1, 0.32)          | 0.58(0.57, 0.41) |
| 20    | 0.19(2.6)       | 0.47(1.47)       | 0.16(1.5, <b>-0.16</b> ) | 0.61(2.81, 0.30) | 0.23(2.3)       | 0.48(1.09)       | 0.34(2.2, 0.48)          | 0.60(0.76, 0.25) |
| 21    | 0.33(3.0)       | 0.48(0.45)       | 0.42(3.3, 0.27)          | 0.61(0.45, 0.27) | 0.18(2.1)       | 0.47(1.61)       | 0.16(1.7, <b>-0.11</b> ) | 0.54(2.38, 0.15) |
| 22    | 0.15(1.3)       | 0.36(1.40)       | 0.25(1.4, 0.67)          | 0.51(1.04, 0.42) | 0.05(1.4)       | 0.31(5.20)       | 0.18(1.6, 2.60)          | 0.47(1.61, 0.52) |
| 23    | 0.32(3.0)       | 0.44(0.38)       | 0.27(2.0, -0.16)         | 0.54(1.00, 0.23) | 0.08(1.5)       | 0.30(2.75)       | 0.25(2.4, 2.12)          | 0.54(1.16, 0.80) |
| 24    | 0.20(2.3)       | 0.48(1.40)       | 0.12(1.1, -0.40)         | 0.57(3.75, 0.19) | 0.35(3.2)       | 0.50(0.43)       | 0.45(2.7, 0.29)          | 0.64(0.42, 0.28) |
| 25    | 0.18(2.6)       | 0.50(1.78)       | 0.20(1.8, 0.11)          | 0.61(2.05, 0.22) | 0.31(3.1)       | 0.47(0.52)       | 0.32(2.2, <b>0.03</b> )  | 0.60(0.87, 0.28) |
| Mean  | 0.20(2.1)       | 0.39(0.98)       | 0.24(1.8, 0.25)          | 0.53(1.19, 0.38) | 0.19(2.2)       | 0.41(1.14)       | 0.27(2.0, 0.42)          | 0.55(1.05, 0.36) |

<sup>a</sup> In parentheses is the number of QTL identified by QP based on the SE model; <sup>b</sup> In parentheses is the gain in prediction accuracy with GWP over QP based on the SE model; <sup>c</sup> The first value in parentheses is the number of QTL identified by QP based on the ME model; and the second one the gain

with ME over SE for QP; <sup>d</sup> The first value in parentheses is the gain in accuracy with GWP over QP based on the ME model; and the second one is the gain in accuracy with ME over SE using GWP. Bold in parentheses indicates the number is not significant at  $\alpha = 0.05$ .
