# Supplementary material for: Accuracy of Across-Environment Genome-Wide Prediction in Maize Nested Association Mapping Populations
Source: PubMed Central journal article supplement (PMC3564986; doi:10.1534/g3.112.005066), 2013-02-01
Supplement: supp_3.2.263_TableS16.pdf [file supp_3.2.263_TableS16.pdf]

**Table S16 Accuracy of WP prediction for environment E2 with QP and GWP in CV2**

| PopId | LL              |                  |                          |                  | LW              |                  |                         |                  |
|-------|-----------------|------------------|--------------------------|------------------|-----------------|------------------|-------------------------|------------------|
|       | SE              |                  | ME                       |                  | SE              |                  | ME                      |                  |
|       | QP <sup>a</sup> | GWP <sup>b</sup> | QP <sup>c</sup>          | GWP <sup>d</sup> | QP <sup>a</sup> | GWP <sup>b</sup> | QP <sup>c</sup>         | GWP <sup>d</sup> |
| 1     | 0.50(3.8)       | 0.67(0.34)       | 0.58(3.4, 0.16)          | 0.75(0.29, 0.12) | 0.20(2.5)       | 0.46(1.30)       | 0.24(1.6, <b>0.20</b> ) | 0.57(1.37, 0.24) |
| 2     | 0.10(2.1)       | 0.40(3.00)       | 0.08(0.8, <b>-0.20</b> ) | 0.56(6.00, 0.40) | 0.21(2.6)       | 0.48(1.29)       | 0.28(1.8, 0.33)         | 0.64(1.29, 0.33) |
| 3     | 0.24(1.7)       | 0.20(-0.17)      | 0.08(0.8, -0.67)         | 0.30(2.75, 0.50) | 0.34(3.3)       | 0.60(0.76)       | 0.45(2.6, 0.32)         | 0.70(0.56, 0.17) |
| 4     | 0.22(3.0)       | 0.56(1.55)       | 0.35(3.2, 0.59)          | 0.68(0.94, 0.21) | 0.41(3.1)       | 0.61(0.49)       | 0.32(1.6, -0.22)        | 0.70(1.19, 0.15) |
| 5     | 0.27(2.8)       | 0.50(0.85)       | 0.31(1.9, 0.15)          | 0.64(1.06, 0.28) | 0.08(2.3)       | 0.46(4.75)       | 0.15(0.9, 0.87)         | 0.64(3.27, 0.39) |
| 6     | 0.22(2.8)       | 0.47(1.14)       | 0.25(2.3, <b>0.14</b> )  | 0.58(1.32, 0.23) | 0.06(1.2)       | 0.31(4.17)       | 0.09(1.0, <b>0.50</b> ) | 0.37(3.11, 0.19) |
| 7     | 0.27(2.1)       | 0.41(0.52)       | 0.33(1.9, 0.22)          | 0.62(0.88, 0.51) | 0.34(2.9)       | 0.59(0.74)       | 0.35(1.9, <b>0.03</b> ) | 0.72(1.06, 0.22) |
| 8     | 0.10(2.0)       | 0.34(2.40)       | 0.21(1.7, 1.10)          | 0.51(1.43, 0.50) | 0.24(1.8)       | 0.36(0.50)       | 0.35(2.2, 0.46)         | 0.53(0.51, 0.47) |
| 9     | 0.10(1.9)       | 0.33(2.30)       | 0.18(1.7, 0.80)          | 0.46(1.56, 0.39) | 0.23(2.3)       | 0.47(1.04)       | 0.34(1.7, 0.48)         | 0.54(0.59, 0.15) |
| 10    | 0.22(2.9)       | 0.51(1.32)       | 0.31(2.1, 0.41)          | 0.65(1.10, 0.27) | 0.13(1.9)       | 0.36(1.77)       | 0.26(2.4, 1.00)         | 0.46(0.77, 0.28) |
| 11    | 0.27(3.0)       | 0.52(0.93)       | 0.40(2.6, 0.48)          | 0.62(0.55, 0.19) | 0.29(2.1)       | 0.41(0.41)       | 0.29(1.7, <b>0.00</b> ) | 0.54(0.86, 0.32) |
| 12    | 0.24(3.1)       | 0.55(1.29)       | 0.36(2.9, 0.50)          | 0.68(0.89, 0.24) | 0.29(3.6)       | 0.58(1.00)       | 0.38(2.8, 0.31)         | 0.65(0.71, 0.12) |
| 13    | 0.22(2.3)       | 0.39(0.77)       | 0.32(1.6, 0.45)          | 0.65(1.03, 0.67) | 0.18(2.2)       | 0.42(1.33)       | 0.31(1.7, 0.72)         | 0.60(0.94, 0.43) |
| 14    | 0.32(2.7)       | 0.42(0.31)       | 0.25(1.6, -0.22)         | 0.58(1.32, 0.38) | 0.04(1.4)       | 0.25(5.25)       | 0.12(1.4, 2.00)         | 0.45(2.75, 0.80) |
| 15    | 0.26(3.0)       | 0.48(0.85)       | 0.27(1.4, <b>0.04</b> )  | 0.65(1.41, 0.35) | 0.23(3.2)       | 0.55(1.39)       | 0.32(2.5, 0.39)         | 0.67(1.09, 0.22) |
| 16    | 0.19(2.0)       | 0.33(0.74)       | 0.21(1.2, <b>0.11</b> )  | 0.46(1.19, 0.39) | 0.42(3.3)       | 0.55(0.31)       | 0.46(2.7, 0.10)         | 0.64(0.39, 0.16) |
| 17    | 0.05(0.8)       | 0.12(1.40)       | 0.09(0.8, 0.80)          | 0.29(2.22, 1.42) | 0.41(3.6)       | 0.61(0.49)       | 0.47(3.5, 0.15)         | 0.73(0.55, 0.20) |
| 18    | 0.02(1.3)       | 0.27(12.50)      | 0.07(0.6, 2.50)          | 0.40(4.71, 0.48) | 0.17(1.7)       | 0.31(0.82)       | 0.24(1.6, 0.41)         | 0.50(1.08, 0.61) |
| 19    | 0.07(1.7)       | 0.27(2.86)       | 0.11(1.5, 0.57)          | 0.40(2.64, 0.48) | 0.20(2.2)       | 0.41(1.05)       | 0.34(2.1, 0.70)         | 0.57(0.68, 0.39) |
| 20    | 0.12(2.3)       | 0.52(3.33)       | 0.16(1.5, 0.33)          | 0.66(3.12, 0.27) | 0.32(2.6)       | 0.54(0.69)       | 0.40(2.2, 0.25)         | 0.69(0.72, 0.28) |
| 21    | 0.35(3.5)       | 0.58(0.66)       | 0.48(3.3, 0.37)          | 0.70(0.46, 0.21) | 0.13(1.9)       | 0.33(1.54)       | 0.20(1.7, 0.54)         | 0.44(1.20, 0.33) |
| 22    | 0.32(2.6)       | 0.50(0.56)       | 0.24(1.4, -0.25)         | 0.60(1.50, 0.20) | 0.32(3.0)       | 0.59(0.84)       | 0.27(1.6, -0.16)        | 0.68(1.52, 0.15) |
| 23    | 0.16(2.3)       | 0.43(1.69)       | 0.19(2.0, <b>0.19</b> )  | 0.53(1.79, 0.23) | 0.23(2.3)       | 0.37(0.61)       | 0.27(2.4, 0.17)         | 0.49(0.81, 0.32) |
| 24    | 0.01(1.0)       | 0.16(15.00)      | 0.10(1.1, 9.00)          | 0.44(3.40, 1.75) | 0.24(2.2)       | 0.45(0.88)       | 0.42(2.7, 0.75)         | 0.62(0.48, 0.38) |
| 25    | 0.08(2.0)       | 0.40(4.00)       | 0.14(1.8, 0.75)          | 0.57(3.07, 0.42) | 0.29(2.8)       | 0.48(0.66)       | 0.37(2.2, 0.28)         | 0.54(0.46, 0.13) |
| Mean  | 0.20(2.3)       | 0.41(1.10)       | 0.24(1.8, 0.23)          | 0.56(1.30, 0.35) | 0.24(2.5)       | 0.46(0.92)       | 0.31(2.0, 0.28)         | 0.59(0.91, 0.27) |

<sup>a</sup> In parentheses is the number of QTL identified by QP based on the SE model; <sup>b</sup> In parentheses is the gain in prediction accuracy with GWP over QP based on the SE model; <sup>c</sup> The first value in parentheses is the number of QTL identified by QP based on the ME model; and the second one the gain

with ME over SE for QP; <sup>d</sup> The first value in parentheses is the gain in accuracy with GWP over QP based on the ME model; and the second one is the gain in accuracy with ME over SE using GWP. Bold in parentheses indicates the number is not significant at  $\alpha = 0.05$ .
