# Supplementary material for: Accuracy of Across-Environment Genome-Wide Prediction in Maize Nested Association Mapping Populations
Source: PubMed Central journal article supplement (PMC3564986; doi:10.1534/g3.112.005066), 2013-02-01
Supplement: supp_3.2.263_TableS17.pdf [file supp_3.2.263_TableS17.pdf]

**Table S17 Accuracy of WP prediction for environment E3 with QP and GWP in CV2**

| PopId | LL              |                  |                          |                  | LW              |                  |                          |                  |
|-------|-----------------|------------------|--------------------------|------------------|-----------------|------------------|--------------------------|------------------|
|       | SE              |                  | ME                       |                  | SE              |                  | ME                       |                  |
|       | QP <sup>a</sup> | GWP <sup>b</sup> | QP <sup>c</sup>          | GWP <sup>d</sup> | QP <sup>a</sup> | GWP <sup>b</sup> | QP <sup>c</sup>          | GWP <sup>d</sup> |
| 1     | 0.34(2.6)       | 0.51(0.50)       | 0.47(3.4, <b>0.38</b> )  | 0.65(0.38, 0.27) | 0.12(1.7)       | 0.36(2.00)       | 0.15(1.6, <b>0.25</b> )  | 0.45(2.00, 0.25) |
| 2     | 0.12(1.9)       | 0.36(2.00)       | 0.08(0.8, -0.33)         | 0.51(5.38, 0.42) | 0.22(2.7)       | 0.52(1.36)       | 0.26(1.8, <b>0.18</b> )  | 0.65(1.50, 0.25) |
| 3     | 0.08(1.5)       | 0.23(1.88)       | 0.07(0.8, <b>-0.12</b> ) | 0.35(4.00, 0.52) | 0.25(2.0)       | 0.26(0.04)       | 0.36(2.6, 0.44)          | 0.46(0.28, 0.77) |
| 4     | 0.31(2.6)       | 0.51(0.65)       | 0.37(3.2, 0.19)          | 0.60(0.62, 0.18) | 0.01(1.1)       | 0.19(18.00)      | 0.13(1.6, 12.00)         | 0.38(1.92, 1.00) |
| 5     | 0.23(2.5)       | 0.46(1.00)       | 0.29(1.9, 0.26)          | 0.60(1.07, 0.30) | 0.03(1.4)       | 0.30(9.00)       | 0.08(0.9, 1.67)          | 0.52(5.50, 0.73) |
| 6     | 0.34(2.4)       | 0.47(0.38)       | 0.32(2.3, <b>-0.06</b> ) | 0.59(0.84, 0.26) | 0.08(1.8)       | 0.31(2.87)       | 0.08(1.0, <b>0.00</b> )  | 0.43(4.38, 0.39) |
| 7     | 0.28(2.3)       | 0.49(0.75)       | 0.31(1.9, <b>0.11</b> )  | 0.64(1.06, 0.31) | 0.22(2.1)       | 0.42(0.91)       | 0.29(1.9, 0.32)          | 0.59(1.03, 0.40) |
| 8     | 0.09(1.8)       | 0.32(2.56)       | 0.17(1.7, 0.89)          | 0.50(1.94, 0.56) | 0.13(2.4)       | 0.46(2.54)       | 0.26(2.2, 1.00)          | 0.54(1.08, 0.17) |
| 9     | 0.19(2.1)       | 0.42(1.21)       | 0.28(1.7, 0.47)          | 0.54(0.93, 0.29) | 0.18(2.5)       | 0.45(1.50)       | 0.31(1.7, 0.72)          | 0.57(0.84, 0.27) |
| 10    | 0.10(2.3)       | 0.42(3.20)       | 0.27(2.1, 1.70)          | 0.62(1.30, 0.48) | 0.32(3.5)       | 0.55(0.72)       | 0.31(2.4, <b>-0.03</b> ) | 0.62(1.00, 0.13) |
| 11    | 0.30(2.7)       | 0.53(0.77)       | 0.39(2.6, 0.30)          | 0.63(0.62, 0.19) | 0.12(2.0)       | 0.38(2.17)       | 0.17(1.7, 0.42)          | 0.52(2.06, 0.37) |
| 12    | 0.21(2.3)       | 0.42(1.00)       | 0.29(2.9, 0.38)          | 0.56(0.93, 0.33) | 0.05(1.4)       | 0.27(4.40)       | 0.23(2.8, 3.60)          | 0.41(0.78, 0.52) |
| 13    | 0.19(2.6)       | 0.43(1.26)       | 0.30(1.6, 0.58)          | 0.61(1.03, 0.42) | 0.06(1.9)       | 0.27(3.50)       | 0.26(1.7, 3.33)          | 0.51(0.96, 0.89) |
| 14    | 0.19(1.5)       | 0.33(0.74)       | 0.17(1.6, <b>-0.11</b> ) | 0.48(1.82, 0.45) | 0.09(1.5)       | 0.33(2.67)       | 0.18(1.4, 1.00)          | 0.53(1.94, 0.61) |
| 15    | 0.05(1.2)       | 0.25(4.00)       | 0.17(1.4, 2.40)          | 0.46(1.71, 0.84) | 0.17(2.6)       | 0.39(1.29)       | 0.27(2.5, 0.59)          | 0.57(1.11, 0.46) |
| 16    | 0.08(1.8)       | 0.33(3.12)       | 0.10(1.2, <b>0.25</b> )  | 0.43(3.30, 0.30) | 0.09(1.8)       | 0.36(3.00)       | 0.31(2.7, 2.44)          | 0.52(0.68, 0.44) |
| 17    | 0.10(1.6)       | 0.32(2.20)       | 0.12(0.8, <b>0.20</b> )  | 0.44(2.67, 0.38) | 0.10(1.8)       | 0.37(2.70)       | 0.32(3.5, 2.20)          | 0.54(0.69, 0.46) |
| 18    | 0.00(0.9)       | 0.18             | 0.05(0.6)                | 0.28(4.60, 0.56) | 0.34(2.2)       | 0.35(0.03)       | 0.29(1.6, -0.15)         | 0.47(0.62, 0.34) |
| 19    | 0.22(2.6)       | 0.46(1.09)       | 0.20(1.5, <b>-0.09</b> ) | 0.57(1.85, 0.24) | 0.21(2.0)       | 0.41(0.95)       | 0.35(2.1, 0.67)          | 0.54(0.54, 0.32) |
| 20    | 0.14(2.1)       | 0.32(1.29)       | 0.16(1.5, <b>0.14</b> )  | 0.49(2.06, 0.53) | 0.17(2.2)       | 0.44(1.59)       | 0.33(2.2, 0.94)          | 0.58(0.76, 0.32) |
| 21    | 0.25(2.7)       | 0.47(0.88)       | 0.46(3.3, 0.84)          | 0.63(0.37, 0.34) | 0.21(2.4)       | 0.41(0.95)       | 0.21(1.7, <b>0.00</b> )  | 0.50(1.38, 0.22) |
| 22    | 0.23(1.9)       | 0.39(0.70)       | 0.28(1.4, 0.22)          | 0.51(0.82, 0.31) | 0.10(1.6)       | 0.34(2.40)       | 0.20(1.6, 1.00)          | 0.52(1.60, 0.53) |
| 23    | 0.21(1.7)       | 0.31(0.48)       | 0.27(2.0, 0.29)          | 0.50(0.85, 0.61) | 0.15(2.1)       | 0.40(1.67)       | 0.29(2.4, 0.93)          | 0.52(0.79, 0.30) |
| 24    | 0.05(1.5)       | 0.26(4.20)       | 0.09(1.1, 0.80)          | 0.41(3.56, 0.58) | 0.37(2.3)       | 0.41(0.11)       | 0.47(2.7, 0.27)          | 0.57(0.21, 0.39) |
| 25    | 0.10(1.7)       | 0.36(2.60)       | 0.17(1.8, 0.70)          | 0.50(1.94, 0.39) | 0.12(1.8)       | 0.29(1.42)       | 0.26(2.2, 1.17)          | 0.44(0.69, 0.52) |
| Mean  | 0.18(2.0)       | 0.38(1.17)       | 0.23(1.8, 0.33)          | 0.52(1.24, 0.37) | 0.16(2.0)       | 0.37(1.36)       | 0.25(2.0, 0.63)          | 0.52(1.03, 0.40) |

<sup>a</sup> In parentheses is the number of QTL identified by QP based on the SE model; <sup>b</sup> In parentheses is the gain in prediction accuracy with GWP over QP based on the SE model; <sup>c</sup> The first value in parentheses is the number of QTL identified by QP based on the ME model; and the second one the gain

with ME over SE for QP; <sup>d</sup> The first value in parentheses is the gain in accuracy with GWP over QP based on the ME model; and the second one is the gain in accuracy with ME over SE using GWP. Bold in parentheses indicates the number is not significant at  $\alpha = 0.05$ .
