# Supplementary material for: Accuracy of Across-Environment Genome-Wide Prediction in Maize Nested Association Mapping Populations
Source: PubMed Central journal article supplement (PMC3564986; doi:10.1534/g3.112.005066), 2013-02-01
Supplement: supp_3.2.263_TableS18.pdf [file supp_3.2.263_TableS18.pdf]

**Table S18 Accuracy of WP prediction for environment E4 with QP and GWP in CV2**

| PopId | LL              |                  |                          |                  | LW              |                  |                          |                  |
|-------|-----------------|------------------|--------------------------|------------------|-----------------|------------------|--------------------------|------------------|
|       | SE              |                  | ME                       |                  | SE              |                  | ME                       |                  |
|       | QP <sup>a</sup> | GWP <sup>b</sup> | QP <sup>c</sup>          | GWP <sup>d</sup> | QP <sup>a</sup> | GWP <sup>b</sup> | QP <sup>c</sup>          | GWP <sup>d</sup> |
| 1     | 0.31(2.4)       | 0.46(0.48)       | 0.47(3.4, 0.52)          | 0.61(0.30, 0.33) | 0.25(2.5)       | 0.51(1.04)       | 0.25(1.6, <b>0.00</b> )  | 0.62(1.48, 0.22) |
| 2     | 0.05(2.0)       | 0.30(5.00)       | 0.08(0.8, <b>0.60</b> )  | 0.52(5.50, 0.73) | 0.20(2.5)       | 0.46(1.30)       | 0.25(1.8, 0.25)          | 0.62(1.48, 0.35) |
| 3     | 0.08(1.3)       | 0.27(2.38)       | 0.06(0.8, <b>-0.25</b> ) | 0.36(5.00, 0.33) | 0.29(2.6)       | 0.41(0.41)       | 0.40(2.6, 0.38)          | 0.61(0.52, 0.49) |
| 4     | 0.31(3.1)       | 0.53(0.71)       | 0.43(3.2, 0.39)          | 0.65(0.51, 0.23) | 0.33(2.8)       | 0.52(0.58)       | 0.25(1.6, -0.24)         | 0.63(1.52, 0.21) |
| 5     | 0.07(1.8)       | 0.37(4.29)       | 0.18(1.9, 1.57)          | 0.55(2.06, 0.49) | 0.07(2.2)       | 0.44(5.29)       | 0.13(0.9, 0.86)          | 0.62(3.77, 0.41) |
| 6     | 0.22(2.7)       | 0.47(1.14)       | 0.31(2.3, 0.41)          | 0.59(0.90, 0.26) | 0.08(1.4)       | 0.31(2.87)       | 0.10(1.0, <b>0.25</b> )  | 0.46(3.60, 0.48) |
| 7     | 0.33(2.6)       | 0.60(0.82)       | 0.38(1.9, 0.15)          | 0.73(0.92, 0.22) | 0.38(3.2)       | 0.61(0.61)       | 0.35(1.9, <b>-0.08</b> ) | 0.72(1.06, 0.18) |
| 8     | 0.18(2.2)       | 0.37(1.06)       | 0.26(1.7, 0.44)          | 0.59(1.27, 0.59) | 0.28(2.3)       | 0.40(0.43)       | 0.37(2.2, 0.32)          | 0.57(0.54, 0.42) |
| 9     | 0.10(1.9)       | 0.33(2.30)       | 0.18(1.7, 0.80)          | 0.48(1.67, 0.45) | 0.37(2.6)       | 0.48(0.30)       | 0.39(1.7, <b>0.05</b> )  | 0.51(0.31, 0.06) |
| 10    | 0.13(2.2)       | 0.42(2.23)       | 0.25(2.1, 0.92)          | 0.57(1.28, 0.36) | 0.26(3.3)       | 0.62(1.38)       | 0.32(2.4, 0.23)          | 0.72(1.25, 0.16) |
| 11    | 0.16(2.1)       | 0.29(0.81)       | 0.37(2.6, 1.31)          | 0.49(0.32, 0.69) | 0.18(2.6)       | 0.46(1.56)       | 0.24(1.7, 0.33)          | 0.60(1.50, 0.30) |
| 12    | 0.15(2.7)       | 0.50(2.33)       | 0.32(2.9, 1.13)          | 0.64(1.00, 0.28) | 0.38(3.4)       | 0.57(0.50)       | 0.45(2.8, 0.18)          | 0.66(0.47, 0.16) |
| 13    | 0.10(1.3)       | 0.24(1.40)       | 0.30(1.6, 2.00)          | 0.54(0.80, 1.25) | 0.16(2.1)       | 0.42(1.62)       | 0.28(1.7, 0.75)          | 0.60(1.14, 0.43) |
| 14    | 0.06(1.9)       | 0.35(4.83)       | 0.19(1.6, 2.17)          | 0.53(1.79, 0.51) | 0.24(2.3)       | 0.44(0.83)       | 0.23(1.4, <b>-0.04</b> ) | 0.63(1.74, 0.43) |
| 15    | 0.21(1.9)       | 0.37(0.76)       | 0.23(1.4, <b>0.10</b> )  | 0.57(1.48, 0.54) | 0.29(3.0)       | 0.54(0.86)       | 0.35(2.5, 0.21)          | 0.68(0.94, 0.26) |
| 16    | 0.08(1.3)       | 0.21(1.62)       | 0.19(1.2, 1.38)          | 0.42(1.21, 1.00) | 0.30(3.0)       | 0.54(0.80)       | 0.43(2.7, 0.43)          | 0.66(0.53, 0.22) |
| 17    | 0.12(1.6)       | 0.35(1.92)       | 0.13(0.8, <b>0.08</b> )  | 0.48(2.69, 0.37) | 0.31(3.3)       | 0.56(0.81)       | 0.42(3.5, 0.35)          | 0.70(0.67, 0.25) |
| 18    | 0.04(1.3)       | 0.26(5.50)       | 0.06(0.6, <b>0.50</b> )  | 0.37(5.17, 0.42) | 0.22(2.0)       | 0.33(0.50)       | 0.28(1.6, 0.27)          | 0.45(0.61, 0.36) |
| 19    | 0.06(1.5)       | 0.28(3.67)       | 0.13(1.5, 1.17)          | 0.45(2.46, 0.61) | 0.42(3.4)       | 0.50(0.19)       | 0.42(2.1, <b>0.00</b> )  | 0.66(0.57, 0.32) |
| 20    | 0.11(2.2)       | 0.47(3.27)       | 0.14(1.5, 0.27)          | 0.59(3.21, 0.26) | 0.49(2.6)       | 0.53(0.08)       | 0.45(2.2, -0.08)         | 0.67(0.49, 0.26) |
| 21    | 0.38(3.4)       | 0.61(0.61)       | 0.49(3.3, 0.29)          | 0.69(0.41, 0.13) | 0.10(1.8)       | 0.36(2.60)       | 0.18(1.7, 0.80)          | 0.49(1.72, 0.36) |
| 22    | 0.30(2.3)       | 0.46(0.53)       | 0.28(1.4, <b>-0.07</b> ) | 0.55(0.96, 0.20) | 0.25(2.8)       | 0.54(1.16)       | 0.26(1.6, <b>0.04</b> )  | 0.67(1.58, 0.24) |
| 23    | 0.26(2.0)       | 0.39(0.50)       | 0.29(2.0, 0.12)          | 0.50(0.72, 0.28) | 0.29(3.0)       | 0.48(0.66)       | 0.32(2.4, <b>0.10</b> )  | 0.60(0.87, 0.25) |
| 24    | 0.19(1.9)       | 0.23(0.21)       | 0.13(1.1, -0.32)         | 0.41(2.15, 0.78) | 0.31(3.1)       | 0.46(0.48)       | 0.44(2.7, 0.42)          | 0.62(0.41, 0.35) |
| 25    | 0.02(1.5)       | 0.24(11.00)      | 0.12(1.8, 5.00)          | 0.45(2.75, 0.88) | 0.27(2.5)       | 0.49(0.81)       | 0.38(2.2, 0.41)          | 0.54(0.42, 0.10) |
| Mean  | 0.16(2.0)       | 0.38(1.38)       | 0.24(1.8, 0.49)          | 0.53(1.23, 0.39) | 0.27(2.7)       | 0.48(0.78)       | 0.32(2.0, 0.18)          | 0.61(0.93, 0.28) |

<sup>a</sup> In parentheses is the number of QTL identified by QP based on the SE model; <sup>b</sup> In parentheses is the gain in prediction accuracy with GWP over QP based on the SE model; <sup>c</sup> The first value in parentheses is the number of QTL identified by QP based on the ME model; and the second one the gain

with ME over SE for QP; <sup>d</sup> The first value in parentheses is the gain in accuracy with GWP over QP based on the ME model; and the second one is the gain in accuracy with ME over SE using GWP. Bold in parentheses indicates the number is not significant at  $\alpha = 0.05$ .
