# Supplementary material for: Accuracy of Across-Environment Genome-Wide Prediction in Maize Nested Association Mapping Populations
Source: PubMed Central journal article supplement (PMC3564986; doi:10.1534/g3.112.005066), 2013-02-01
Supplement: supp_3.2.263_TableS19.pdf [file supp_3.2.263_TableS19.pdf]

**Table S19 Accuracy of AP prediction for environment E1 with QP and GWP in CV2**

| PopId | LL              |                     |                          |                           | LW              |                     |                           |                           |
|-------|-----------------|---------------------|--------------------------|---------------------------|-----------------|---------------------|---------------------------|---------------------------|
|       | SE              |                     | ME                       |                           | SE              |                     | ME                        |                           |
|       | QP <sup>a</sup> | GWP <sup>b</sup>    | QP <sup>c</sup>          | GWP <sup>d</sup>          | QP <sup>a</sup> | GWP <sup>b</sup>    | QP <sup>c</sup>           | GWP <sup>d</sup>          |
| 1     | 0.21(8.0)       | 0.31(0.48)          | 0.27(9.5, 0.29)          | 0.35(0.30, 0.13)          | 0.20(8.5)       | 0.27(0.35)          | 0.22(11.0, 0.10)          | 0.30(0.36, 0.11)          |
| 2     | 0.14(8.0)       | 0.17(0.21)          | 0.20(9.5, 0.43)          | 0.22(0.10, 0.29)          | 0.37(8.5)       | 0.41(0.11)          | 0.37(11.0, <b>0.00</b> )  | 0.44(0.19, 0.07)          |
| 3     | 0.20(8.0)       | 0.25(0.25)          | 0.22(9.5, <b>0.10</b> )  | 0.28(0.27, 0.12)          | 0.39(8.5)       | 0.55(0.41)          | 0.46(11.0, 0.18)          | 0.59(0.28, 0.07)          |
| 4     | 0.43(8.0)       | 0.45(0.05)          | 0.40(9.5, -0.07)         | 0.48(0.20, 0.07)          | 0.32(8.5)       | 0.33(0.03)          | 0.29(11.0, -0.09)         | 0.33(0.14, <b>0.00</b> )  |
| 5     | 0.26(8.0)       | 0.26( <b>0.00</b> ) | 0.21(9.5, -0.19)         | 0.28(0.33, 0.08)          | 0.14(8.5)       | 0.24(0.71)          | 0.15(11.0, <b>0.07</b> )  | 0.28(0.87, 0.17)          |
| 6     | 0.39(8.0)       | 0.47(0.21)          | 0.39(9.5, <b>0.00</b> )  | 0.51(0.31, 0.09)          | 0.33(8.5)       | 0.38(0.15)          | 0.39(11.0, 0.18)          | 0.41(0.05, 0.08)          |
| 7     | 0.27(8.0)       | 0.29(0.07)          | 0.32(9.5, 0.19)          | 0.36(0.13, 0.24)          | 0.33(8.5)       | 0.37(0.12)          | 0.39(11.0, 0.18)          | 0.44(0.13, 0.19)          |
| 8     | 0.36(8.0)       | 0.44(0.22)          | 0.40(9.5, 0.11)          | 0.49(0.23, 0.11)          | 0.28(8.5)       | 0.37(0.32)          | 0.33(11.0, 0.18)          | 0.40(0.21, 0.08)          |
| 9     | 0.33(8.0)       | 0.35(0.06)          | 0.36(9.5, 0.09)          | 0.39(0.08, 0.11)          | 0.16(8.5)       | 0.16( <b>0.00</b> ) | 0.18(11.0, 0.12)          | 0.18( <b>0.00</b> , 0.13) |
| 10    | 0.32(8.0)       | 0.39(0.22)          | 0.39(9.5, 0.22)          | 0.44(0.13, 0.13)          | 0.39(8.5)       | 0.44(0.13)          | 0.44(11.0, 0.13)          | 0.50(0.14, 0.14)          |
| 11    | 0.09(8.0)       | 0.14(0.56)          | 0.11(9.5, 0.22)          | 0.20(0.82, 0.43)          | 0.16(8.5)       | 0.21(0.31)          | 0.23(11.0, 0.44)          | 0.24(0.04, 0.14)          |
| 12    | 0.35(8.0)       | 0.40(0.14)          | 0.40(9.5, 0.14)          | 0.46(0.15, 0.15)          | 0.50(8.5)       | 0.57(0.14)          | 0.53(11.0, 0.06)          | 0.60(0.13, 0.05)          |
| 13    | 0.25(8.0)       | 0.28(0.12)          | 0.38(9.5, 0.52)          | 0.38( <b>0.00</b> , 0.36) | 0.41(8.5)       | 0.40(-0.02)         | 0.47(11.0, 0.15)          | 0.44(-0.06, 0.1)          |
| 14    | 0.37(8.0)       | 0.40(0.08)          | 0.39(9.5, 0.05)          | 0.44(0.13, 0.10)          | 0.37(8.5)       | 0.36(-0.03)         | 0.40(11.0, 0.08)          | 0.42(0.05, 0.17)          |
| 15    | 0.23(8.0)       | 0.25(0.09)          | 0.19(9.5, -0.17)         | 0.27(0.42, 0.08)          | 0.22(8.5)       | 0.33(0.50)          | 0.24(11.0, 0.09)          | 0.34(0.42, 0.03)          |
| 16    | 0.21(8.0)       | 0.30(0.43)          | 0.23(9.5, 0.10)          | 0.34(0.48, 0.13)          | 0.42(8.5)       | 0.51(0.21)          | 0.50(11.0, 0.19)          | 0.53(0.06, 0.04)          |
| 17    | 0.29(8.0)       | 0.29( <b>0.00</b> ) | 0.31(9.5, <b>0.07</b> )  | 0.33(0.06, 0.14)          | 0.37(8.5)       | 0.46(0.24)          | 0.46(11.0, 0.24)          | 0.51(0.11, 0.11)          |
| 18    | 0.14(8.0)       | 0.15(0.07)          | 0.14(9.5, <b>0.00</b> )  | 0.17(0.21, 0.13)          | 0.21(8.5)       | 0.30(0.43)          | 0.29(11.0, 0.38)          | 0.33(0.14, 0.10)          |
| 19    | 0.29(8.0)       | 0.32(0.10)          | 0.34(9.5, 0.17)          | 0.37(0.09, 0.16)          | 0.22(8.5)       | 0.26(0.18)          | 0.26(11.0, 0.18)          | 0.29(0.12, 0.12)          |
| 20    | 0.29(8.0)       | 0.42(0.45)          | 0.32(9.5, 0.10)          | 0.45(0.41, 0.07)          | 0.38(8.5)       | 0.44(0.16)          | 0.37(11.0, <b>-0.03</b> ) | 0.47(0.27, 0.07)          |
| 21    | 0.30(8.0)       | 0.33(0.10)          | 0.35(9.5, 0.17)          | 0.39(0.11, 0.18)          | 0.28(8.5)       | 0.32(0.14)          | 0.31(11.0, 0.11)          | 0.35(0.13, 0.09)          |
| 22    | 0.30(8.0)       | 0.34(0.13)          | 0.29(9.5, <b>-0.03</b> ) | 0.36(0.24, 0.06)          | 0.24(8.5)       | 0.31(0.29)          | 0.26(11.0, 0.08)          | 0.34(0.31, 0.10)          |
| 23    | 0.15(8.0)       | 0.22(0.47)          | 0.18(9.5, 0.20)          | 0.25(0.39, 0.14)          | 0.15(8.5)       | 0.17(0.13)          | 0.24(11.0, 0.60)          | 0.24( <b>0.00</b> , 0.41) |
| 24    | 0.23(8.0)       | 0.32(0.39)          | 0.23(9.5, <b>0.00</b> )  | 0.32(0.39, <b>0.00</b> )  | 0.45(8.5)       | 0.47(0.04)          | 0.47(11.0, 0.04)          | 0.50(0.06, 0.06)          |
| 25    | 0.39(8.0)       | 0.43(0.10)          | 0.35(9.5, -0.10)         | 0.46(0.31, 0.07)          | 0.38(8.5)       | 0.48(0.26)          | 0.40(11.0, 0.05)          | 0.51(0.28, 0.06)          |
| Mean  | 0.27(8.0)       | 0.32(0.19)          | 0.29(9.5, 0.09)          | 0.36(0.24, 0.12)          | 0.31(8.5)       | 0.36(0.16)          | 0.35(11.1, 0.13)          | 0.40(0.14, 0.10)          |

<sup>a</sup> In parentheses is the number of QTL identified by QP based on the SE model; <sup>b</sup> In parentheses is the gain in prediction accuracy with GWP over QP based on the SE model; <sup>c</sup> The first value in parentheses is the number of QTL identified by QP based on the ME model; and the second one the gain

with ME over SE for QP; <sup>d</sup> The first value in parentheses is the gain in accuracy with GWP over QP based on the ME model; the second one is the gain in accuracy with ME over SE using GWP; and the third one is the gain in accuracy with GWP over PP. Bold in parentheses indicates the number is not significant at  $\alpha = 0.05$ .
