# Supplementary material for: Accuracy of Across-Environment Genome-Wide Prediction in Maize Nested Association Mapping Populations
Source: PubMed Central journal article supplement (PMC3564986; doi:10.1534/g3.112.005066), 2013-02-01
Supplement: supp_3.2.263_TableS20.pdf [file supp_3.2.263_TableS20.pdf]

**Table S20 Accuracy of AP prediction for environment E2 with QP and GWP in CV2**

| PopId | LL              |                     |                          |                           | LW              |                     |                           |                   |
|-------|-----------------|---------------------|--------------------------|---------------------------|-----------------|---------------------|---------------------------|-------------------|
|       | SE              |                     | ME                       |                           | SE              |                     | ME                        |                   |
|       | QP <sup>a</sup> | GWP <sup>b</sup>    | QP <sup>c</sup>          | GWP <sup>d</sup>          | QP <sup>a</sup> | GWP <sup>b</sup>    | QP <sup>c</sup>           | GWP <sup>d</sup>  |
| 1     | 0.33(9.8)       | 0.45(0.36)          | 0.30(9.5, -0.09)         | 0.47(0.57, 0.04)          | 0.22(10.6)      | 0.25(0.14)          | 0.28(11.0, 0.27)          | 0.30(0.07, 0.20)  |
| 2     | 0.27(9.8)       | 0.30(0.11)          | 0.28(9.5, 0.04)          | 0.36(0.29, 0.20)          | 0.35(10.6)      | 0.45(0.29)          | 0.39(11.0, 0.11)          | 0.50(0.28, 0.11)  |
| 3     | 0.28(9.8)       | 0.30(0.07)          | 0.26(9.5, -0.07)         | 0.32(0.23, 0.07)          | 0.47(10.6)      | 0.56(0.19)          | 0.52(11.0, 0.11)          | 0.60(0.15, 0.07)  |
| 4     | 0.33(9.8)       | 0.42(0.27)          | 0.34(9.5, <b>0.03</b> )  | 0.46(0.35, 0.10)          | 0.35(10.6)      | 0.38(0.09)          | 0.38(11.0, 0.09)          | 0.42(0.11, 0.11)  |
| 5     | 0.28(9.8)       | 0.33(0.18)          | 0.28(9.5, <b>0.00</b> )  | 0.37(0.32, 0.12)          | 0.38(10.6)      | 0.47(0.24)          | 0.41(11.0, 0.08)          | 0.52(0.27, 0.11)  |
| 6     | 0.39(9.8)       | 0.46(0.18)          | 0.43(9.5, 0.10)          | 0.49(0.14, 0.07)          | 0.31(10.6)      | 0.28(-0.10)         | 0.31(11.0, <b>0.00</b> )  | 0.30(-0.03, 0.07) |
| 7     | 0.23(9.8)       | 0.23( <b>0.00</b> ) | 0.25(9.5, 0.09)          | 0.28(0.12, 0.22)          | 0.47(10.6)      | 0.60(0.28)          | 0.48(11.0, 0.02)          | 0.62(0.29, 0.03)  |
| 8     | 0.30(9.8)       | 0.27(-0.10)         | 0.34(9.5, 0.13)          | 0.32(-0.06, 0.19)         | 0.30(10.6)      | 0.36(0.20)          | 0.34(11.0, 0.13)          | 0.38(0.12, 0.06)  |
| 9     | 0.21(9.8)       | 0.21( <b>0.00</b> ) | 0.27(9.5, 0.29)          | 0.24(-0.11, 0.14)         | 0.32(10.6)      | 0.36(0.13)          | 0.38(11.0, 0.19)          | 0.39(0.03, 0.08)  |
| 10    | 0.41(9.8)       | 0.49(0.20)          | 0.40(9.5, <b>-0.02</b> ) | 0.52(0.30, 0.06)          | 0.35(10.6)      | 0.42(0.20)          | 0.41(11.0, 0.17)          | 0.48(0.17, 0.14)  |
| 11    | 0.27(9.8)       | 0.34(0.26)          | 0.28(9.5, <b>0.04</b> )  | 0.39(0.39, 0.15)          | 0.32(10.6)      | 0.37(0.16)          | 0.35(11.0, 0.09)          | 0.40(0.14, 0.08)  |
| 12    | 0.38(9.8)       | 0.42(0.11)          | 0.44(9.5, 0.16)          | 0.46(0.05, 0.10)          | 0.51(10.6)      | 0.60(0.18)          | 0.54(11.0, 0.06)          | 0.63(0.17, 0.05)  |
| 13    | 0.32(9.8)       | 0.36(0.13)          | 0.29(9.5, -0.09)         | 0.40(0.38, 0.11)          | 0.38(10.6)      | 0.41(0.08)          | 0.42(11.0, 0.11)          | 0.44(0.05, 0.07)  |
| 14    | 0.27(9.8)       | 0.27( <b>0.00</b> ) | 0.33(9.5, 0.22)          | 0.33( <b>0.00</b> , 0.22) | 0.35(10.6)      | 0.38(0.09)          | 0.36(11.0, <b>0.03</b> )  | 0.41(0.14, 0.08)  |
| 15    | 0.23(9.8)       | 0.33(0.43)          | 0.25(9.5, <b>0.09</b> )  | 0.37(0.48, 0.12)          | 0.47(10.6)      | 0.54(0.15)          | 0.46(11.0, <b>-0.02</b> ) | 0.55(0.20, 0.02)  |
| 16    | 0.30(9.8)       | 0.41(0.37)          | 0.31(9.5, <b>0.03</b> )  | 0.45(0.45, 0.10)          | 0.48(10.6)      | 0.54(0.13)          | 0.51(11.0, 0.06)          | 0.56(0.10, 0.04)  |
| 17    | 0.05(9.8)       | 0.10(1.00)          | 0.08(9.5, 0.60)          | 0.14(0.75, 0.40)          | 0.58(10.6)      | 0.61(0.05)          | 0.58(11.0, 0.00)          | 0.62(0.07, 0.02)  |
| 18    | 0.15(9.8)       | 0.20(0.33)          | 0.15(9.5, <b>0.00</b> )  | 0.22(0.47, 0.10)          | 0.24(10.6)      | 0.26(0.08)          | 0.22(11.0, -0.08)         | 0.27(0.23, 0.04)  |
| 19    | 0.35(9.8)       | 0.40(0.14)          | 0.39(9.5, 0.11)          | 0.43(0.10, 0.07)          | 0.42(10.6)      | 0.42( <b>0.00</b> ) | 0.41(11.0, <b>-0.02</b> ) | 0.44(0.07, 0.05)  |
| 20    | 0.26(9.8)       | 0.42(0.62)          | 0.26(9.5, <b>0.00</b> )  | 0.44(0.69, 0.05)          | 0.39(10.6)      | 0.44(0.13)          | 0.38(11.0, <b>-0.03</b> ) | 0.46(0.21, 0.05)  |
| 21    | 0.39(9.8)       | 0.48(0.23)          | 0.42(9.5, 0.08)          | 0.51(0.21, 0.06)          | 0.37(10.6)      | 0.44(0.19)          | 0.38(11.0, <b>0.03</b> )  | 0.45(0.18, 0.02)  |
| 22    | 0.44(9.8)       | 0.44( <b>0.00</b> ) | 0.45(9.5, <b>0.02</b> )  | 0.47(0.04, 0.07)          | 0.39(10.6)      | 0.43(0.10)          | 0.36(11.0, -0.08)         | 0.47(0.31, 0.09)  |
| 23    | 0.30(9.8)       | 0.36(0.20)          | 0.29(9.5, <b>-0.03</b> ) | 0.39(0.34, 0.08)          | 0.37(10.6)      | 0.39(0.05)          | 0.39(11.0, 0.05)          | 0.42(0.08, 0.08)  |
| 24    | 0.19(9.8)       | 0.21(0.11)          | 0.19(9.5, <b>0.00</b> )  | 0.25(0.32, 0.19)          | 0.44(10.6)      | 0.49(0.11)          | 0.49(11.0, 0.11)          | 0.51(0.04, 0.04)  |
| 25    | 0.15(9.8)       | 0.27(0.80)          | 0.16(9.5, <b>0.07</b> )  | 0.31(0.94, 0.15)          | 0.30(10.6)      | 0.37(0.23)          | 0.35(11.0, 0.17)          | 0.42(0.20, 0.14)  |
| Mean  | 0.28(9.8)       | 0.34(0.21)          | 0.30(9.5, 0.05)          | 0.37(0.23, 0.10)          | 0.38(10.6)      | 0.43(0.13)          | 0.40(11.1, 0.06)          | 0.46(0.15, 0.07)  |

<sup>a</sup> In parentheses is the number of QTL identified by QP based on the SE model; <sup>b</sup> In parentheses is the gain in prediction accuracy with GWP over QP based on the SE model; <sup>c</sup> The first value in parentheses is the number of QTL identified by QP based on the ME model; and the second one the

gain with ME over SE for QP; <sup>d</sup> The first value in parentheses is the gain in accuracy with GWP over QP based on the ME model; the second one is the gain in accuracy with ME over SE using GWP; and the third one is the gain in accuracy with GWP over PP. Bold in parentheses indicates the number is not significant at  $\alpha = 0.05$ .
