# Supplementary material for: Accuracy of Across-Environment Genome-Wide Prediction in Maize Nested Association Mapping Populations
Source: PubMed Central journal article supplement (PMC3564986; doi:10.1534/g3.112.005066), 2013-02-01
Supplement: supp_3.2.263_TableS21.pdf [file supp_3.2.263_TableS21.pdf]

**Table S21 Accuracy of AP prediction for environment E3 with QP and GWP in CV2**

| PopId | LL              |                     |                          |                   | LW              |                  |                           |                           |
|-------|-----------------|---------------------|--------------------------|-------------------|-----------------|------------------|---------------------------|---------------------------|
|       | SE              |                     | ME                       |                   | SE              |                  | ME                        |                           |
|       | QP <sup>a</sup> | GWP <sup>b</sup>    | QP <sup>c</sup>          | GWP <sup>d</sup>  | QP <sup>a</sup> | GWP <sup>b</sup> | QP <sup>c</sup>           | GWP <sup>d</sup>          |
| 1     | 0.29(7.8)       | 0.41(0.41)          | 0.34(9.5, 0.17)          | 0.45(0.32, 0.10)  | 0.20(7.4)       | 0.23(0.15)       | 0.26(11.0, 0.30)          | 0.27( <b>0.01</b> , 0.17) |
| 2     | 0.27(7.8)       | 0.29(0.07)          | 0.27(9.5, <b>0.00</b> )  | 0.35(0.30, 0.21)  | 0.41(7.4)       | 0.47(0.15)       | 0.44(11.0, 0.07)          | 0.52(0.18, 0.11)          |
| 3     | 0.11(7.8)       | 0.21(0.91)          | 0.14(9.5, 0.27)          | 0.23(0.64, 0.10)  | 0.34(7.4)       | 0.36(0.06)       | 0.32(11.0, -0.06)         | 0.38(0.19, 0.06)          |
| 4     | 0.29(7.8)       | 0.44(0.52)          | 0.31(9.5, <b>0.07</b> )  | 0.46(0.48, 0.05)  | 0.18(7.4)       | 0.22(0.22)       | 0.18(11.0, <b>0.00</b> )  | 0.26(0.44, 0.18)          |
| 5     | 0.22(7.8)       | 0.22( <b>0.00</b> ) | 0.24(9.5, 0.09)          | 0.27(0.13, 0.23)  | 0.38(7.4)       | 0.44(0.16)       | 0.37(11.0, <b>-0.03</b> ) | 0.46(0.24, 0.05)          |
| 6     | 0.39(7.8)       | 0.48(0.23)          | 0.37(9.5, -0.05)         | 0.50(0.35, 0.04)  | 0.19(7.4)       | 0.26(0.37)       | 0.20(11.0, <b>0.05</b> )  | 0.27(0.35, 0.04)          |
| 7     | 0.25(7.8)       | 0.25( <b>0.00</b> ) | 0.19(9.5, -0.24)         | 0.28(0.47, 0.12)  | 0.22(7.4)       | 0.32(0.45)       | 0.29(11.0, 0.32)          | 0.37(0.28, 0.16)          |
| 8     | 0.22(7.8)       | 0.28(0.27)          | 0.24(9.5, 0.09)          | 0.32(0.33, 0.14)  | 0.23(7.4)       | 0.29(0.26)       | 0.26(11.0, 0.13)          | 0.31(0.19, 0.07)          |
| 9     | 0.30(7.8)       | 0.36(0.20)          | 0.35(9.5, 0.17)          | 0.39(0.11, 0.08)  | 0.32(7.4)       | 0.33(0.03)       | 0.34(11.0, 0.06)          | 0.34( <b>0.00</b> , 0.03) |
| 10    | 0.33(7.8)       | 0.48(0.45)          | 0.38(9.5, 0.15)          | 0.51(0.34, 0.06)  | 0.42(7.4)       | 0.55(0.31)       | 0.44(11.0, 0.05)          | 0.57(0.30, 0.04)          |
| 11    | 0.18(7.8)       | 0.27(0.50)          | 0.17(9.5, <b>-0.06</b> ) | 0.31(0.82, 0.15)  | 0.19(7.4)       | 0.27(0.42)       | 0.23(11.0, 0.21)          | 0.31(0.35, 0.15)          |
| 12    | 0.25(7.8)       | 0.32(0.28)          | 0.30(9.5, 0.20)          | 0.35(0.17, 0.09)  | 0.28(7.4)       | 0.32(0.14)       | 0.30(11.0, 0.07)          | 0.33(0.10, 0.03)          |
| 13    | 0.33(7.8)       | 0.38(0.15)          | 0.42(9.5, 0.27)          | 0.46(0.10, 0.21)  | 0.39(7.4)       | 0.40(0.03)       | 0.43(11.0, 0.10)          | 0.42(-0.02, 0.05)         |
| 14    | 0.19(7.8)       | 0.26(0.37)          | 0.19(9.5, <b>0.00</b> )  | 0.30(0.58, 0.15)  | 0.22(7.4)       | 0.26(0.18)       | 0.28(11.0, 0.27)          | 0.32(0.14, 0.23)          |
| 15    | 0.11(7.8)       | 0.25(1.27)          | 0.14(9.5, 0.27)          | 0.31(1.21, 0.24)  | 0.39(7.4)       | 0.49(0.26)       | 0.45(11.0, 0.15)          | 0.52(0.16, 0.06)          |
| 16    | 0.13(7.8)       | 0.20(0.54)          | 0.14(9.5, <b>0.08</b> )  | 0.24(0.71, 0.20)  | 0.37(7.4)       | 0.46(0.24)       | 0.44(11.0, 0.19)          | 0.52(0.18, 0.13)          |
| 17    | 0.25(7.8)       | 0.29(0.16)          | 0.24(9.5, <b>-0.04</b> ) | 0.31(0.29, 0.07)  | 0.21(7.4)       | 0.31(0.48)       | 0.31(11.0, 0.48)          | 0.37(0.19, 0.19)          |
| 18    | 0.08(7.8)       | 0.11(0.38)          | 0.18(9.5, 1.25)          | 0.15(-0.17, 0.36) | 0.34(7.4)       | 0.37(0.09)       | 0.36(11.0, 0.06)          | 0.39(0.08, 0.05)          |
| 19    | 0.33(7.8)       | 0.39(0.18)          | 0.41(9.5, 0.24)          | 0.42(0.02, 0.08)  | 0.33(7.4)       | 0.30(-0.09)      | 0.33(11.0, <b>0.00</b> )  | 0.34(0.03, 0.13)          |
| 20    | 0.21(7.8)       | 0.35(0.67)          | 0.24(9.5, 0.14)          | 0.39(0.63, 0.11)  | 0.41(7.4)       | 0.46(0.12)       | 0.43(11.0, 0.05)          | 0.50(0.16, 0.09)          |
| 21    | 0.30(7.8)       | 0.46(0.53)          | 0.42(9.5, 0.40)          | 0.52(0.24, 0.13)  | 0.37(7.4)       | 0.42(0.14)       | 0.44(11.0, 0.19)          | 0.45(0.02, 0.07)          |
| 22    | 0.23(7.8)       | 0.21(-0.09)         | 0.31(9.5, 0.35)          | 0.26(-0.16, 0.24) | 0.19(7.4)       | 0.27(0.42)       | 0.25(11.0, 0.32)          | 0.31(0.24, 0.15)          |
| 23    | 0.20(7.8)       | 0.23(0.15)          | 0.19(9.5, <b>-0.05</b> ) | 0.27(0.42, 0.17)  | 0.21(7.4)       | 0.29(0.38)       | 0.26(11.0, 0.24)          | 0.33(0.27, 0.14)          |
| 24    | 0.12(7.8)       | 0.20(0.67)          | 0.16(9.5, 0.33)          | 0.23(0.44, 0.15)  | 0.40(7.4)       | 0.39(-0.03)      | 0.44(11.0, 0.10)          | 0.43(-0.02, 0.10)         |
| 25    | 0.23(7.8)       | 0.38(0.65)          | 0.20(9.5, -0.13)         | 0.39(0.95, 0.03)  | 0.23(7.4)       | 0.26(0.13)       | 0.23(11.0, <b>0.00</b> )  | 0.28(0.22, 0.08)          |
| Mean  | 0.23(7.8)       | 0.31(0.35)          | 0.26(9.5, 0.13)          | 0.35(0.35, 0.12)  | 0.30(7.3)       | 0.35(0.17)       | 0.33(11.1, 0.12)          | 0.38(0.15, 0.09)          |

<sup>a</sup> In parentheses is the number of QTL identified by QP based on the SE model; <sup>b</sup> In parentheses is the gain in prediction accuracy with GWP over QP based on the SE model; <sup>c</sup> The first value in parentheses is the number of QTL identified by QP based on the ME model; and the second one the gain

with ME over SE for QP; <sup>d</sup> The first value in parentheses is the gain in accuracy with GWP over QP based on the ME model; the second one is the gain in accuracy with ME over SE using GWP; and the third one is the gain in accuracy with GWP over PP. Bold in parentheses indicates the number is not significant at  $\alpha = 0.05$ .
