# Supplementary material for: Accuracy of Across-Environment Genome-Wide Prediction in Maize Nested Association Mapping Populations
Source: PubMed Central journal article supplement (PMC3564986; doi:10.1534/g3.112.005066), 2013-02-01
Supplement: supp_3.2.263_TableS22.pdf [file supp_3.2.263_TableS22.pdf]

**Table S22 Accuracy of AP prediction for environment E4 with QP and GWP in CV2**

| PopId | LL              |                  |                          |                           | LW              |                  |                           |                   |
|-------|-----------------|------------------|--------------------------|---------------------------|-----------------|------------------|---------------------------|-------------------|
|       | SE              |                  | ME                       |                           | SE              |                  | ME                        |                   |
|       | QP <sup>a</sup> | GWP <sup>b</sup> | QP <sup>c</sup>          | GWP <sup>d</sup>          | QP <sup>a</sup> | GWP <sup>b</sup> | QP <sup>c</sup>           | GWP <sup>d</sup>  |
| 1     | 0.22(7.4)       | 0.30(0.36)       | 0.24(9.5, <b>0.09</b> )  | 0.36(0.50, 0.20)          | 0.30(11.0)      | 0.34(0.13)       | 0.34(11.0, 0.13)          | 0.37(0.09, 0.09)  |
| 2     | 0.18(7.4)       | 0.25(0.39)       | 0.21(9.5, 0.17)          | 0.28(0.33, 0.12)          | 0.40(11.0)      | 0.44(0.10)       | 0.41(11.0, 0.02)          | 0.47(0.15, 0.07)  |
| 3     | 0.23(7.4)       | 0.26(0.13)       | 0.23(9.5, <b>0.00</b> )  | 0.30(0.30, 0.15)          | 0.37(11.0)      | 0.40(0.08)       | 0.37(11.0, <b>0.00</b> )  | 0.44(0.19, 0.10)  |
| 4     | 0.33(7.4)       | 0.45(0.36)       | 0.37(9.5, 0.12)          | 0.50(0.35, 0.11)          | 0.29(11.0)      | 0.31(0.07)       | 0.30(11.0, <b>0.03</b> )  | 0.34(0.13, 0.10)  |
| 5     | 0.23(7.4)       | 0.39(0.70)       | 0.26(9.5, 0.13)          | 0.42(0.62, 0.08)          | 0.28(11.0)      | 0.35(0.25)       | 0.32(11.0, 0.14)          | 0.40(0.25, 0.14)  |
| 6     | 0.38(7.4)       | 0.46(0.21)       | 0.42(9.5, 0.11)          | 0.52(0.24, 0.13)          | 0.31(11.0)      | 0.36(0.16)       | 0.31(11.0, <b>0.00</b> )  | 0.37(0.19, 0.03)  |
| 7     | 0.22(7.4)       | 0.36(0.64)       | 0.24(9.5, <b>0.09</b> )  | 0.39(0.63, 0.08)          | 0.47(11.0)      | 0.53(0.13)       | 0.50(11.0, 0.06)          | 0.57(0.14, 0.08)  |
| 8     | 0.24(7.4)       | 0.35(0.46)       | 0.32(9.5, 0.33)          | 0.40(0.25, 0.14)          | 0.32(11.0)      | 0.40(0.25)       | 0.36(11.0, 0.12)          | 0.44(0.22, 0.10)  |
| 9     | 0.27(7.4)       | 0.34(0.26)       | 0.30(9.5, 0.11)          | 0.37(0.23, 0.09)          | 0.38(11.0)      | 0.42(0.11)       | 0.41(11.0, 0.08)          | 0.46(0.12, 0.10)  |
| 10    | 0.35(7.4)       | 0.46(0.31)       | 0.34(9.5, <b>-0.03</b> ) | 0.51(0.50, 0.11)          | 0.46(11.0)      | 0.55(0.20)       | 0.46(11.0, <b>0.00</b> )  | 0.58(0.26, 0.05)  |
| 11    | 0.14(7.4)       | 0.27(0.93)       | 0.20(9.5, 0.43)          | 0.32(0.60, 0.19)          | 0.35(11.0)      | 0.37(0.06)       | 0.34(11.0, <b>-0.03</b> ) | 0.38(0.12, 0.03)  |
| 12    | 0.31(7.4)       | 0.34(0.10)       | 0.40(9.5, 0.29)          | 0.41(0.02, 0.21)          | 0.56(11.0)      | 0.58(0.04)       | 0.56(11.0, <b>0.00</b> )  | 0.60(0.07, 0.03)  |
| 13    | 0.18(7.4)       | 0.16(-0.11)      | 0.24(9.5, 0.33)          | 0.21(-0.13, 0.31)         | 0.29(11.0)      | 0.32(0.10)       | 0.37(11.0, 0.28)          | 0.38(0.03, 0.19)  |
| 14    | 0.25(7.4)       | 0.35(0.40)       | 0.28(9.5, 0.12)          | 0.38(0.36, 0.09)          | 0.33(11.0)      | 0.35(0.06)       | 0.36(11.0, 0.09)          | 0.38(0.06, 0.09)  |
| 15    | 0.17(7.4)       | 0.25(0.47)       | 0.21(9.5, 0.24)          | 0.30(0.43, 0.20)          | 0.56(11.0)      | 0.61(0.09)       | 0.57(11.0, 0.02)          | 0.63(0.11, 0.03)  |
| 16    | 0.18(7.4)       | 0.25(0.39)       | 0.20(9.5, 0.11)          | 0.30(0.50, 0.20)          | 0.49(11.0)      | 0.58(0.18)       | 0.53(11.0, 0.08)          | 0.60(0.13, 0.03)  |
| 17    | 0.14(7.4)       | 0.25(0.79)       | 0.15(9.5, <b>0.07</b> )  | 0.27(0.80, 0.08)          | 0.54(11.0)      | 0.55(0.02)       | 0.54(11.0, <b>0.00</b> )  | 0.57(0.06, 0.04)  |
| 18    | 0.12(7.4)       | 0.16(0.33)       | 0.19(9.5, 0.58)          | 0.18(-0.05, 0.13)         | 0.39(11.0)      | 0.41(0.05)       | 0.39(11.0, <b>0.00</b> )  | 0.42(0.08, 0.02)  |
| 19    | 0.22(7.4)       | 0.21(-0.05)      | 0.27(9.5, 0.23)          | 0.25(-0.07, 0.19)         | 0.40(11.0)      | 0.38(-0.05)      | 0.44(11.0, 0.10)          | 0.41(-0.07, 0.08) |
| 20    | 0.27(7.4)       | 0.42(0.56)       | 0.32(9.5, 0.19)          | 0.46(0.44, 0.10)          | 0.47(11.0)      | 0.52(0.11)       | 0.47(11.0, 0.00)          | 0.56(0.19, 0.08)  |
| 21    | 0.43(7.4)       | 0.52(0.21)       | 0.48(9.5, 0.12)          | 0.55(0.15, 0.06)          | 0.35(11.0)      | 0.41(0.17)       | 0.40(11.0, 0.14)          | 0.45(0.13, 0.10)  |
| 22    | 0.30(7.4)       | 0.29(-0.03)      | 0.31(9.5, <b>0.03</b> )  | 0.31( <b>0.00</b> , 0.07) | 0.34(11.0)      | 0.42(0.24)       | 0.33(11.0, -0.03)         | 0.45(0.36, 0.07)  |
| 23    | 0.06(7.4)       | 0.14(1.33)       | 0.05(9.5, -0.17)         | 0.17(2.40, 0.21)          | 0.31(11.0)      | 0.32(0.03)       | 0.30(11.0, -0.03)         | 0.35(0.17, 0.09)  |
| 24    | 0.18(7.4)       | 0.28(0.56)       | 0.21(9.5, 0.17)          | 0.29(0.38, 0.04)          | 0.46(11.0)      | 0.50(0.09)       | 0.49(11.0, 0.07)          | 0.52(0.06, 0.04)  |
| 25    | 0.15(7.4)       | 0.28(0.87)       | 0.17(9.5, 0.13)          | 0.33(0.94, 0.18)          | 0.36(11.0)      | 0.42(0.17)       | 0.34(11.0, -0.06)         | 0.44(0.29, 0.05)  |
| Mean  | 0.23(7.4)       | 0.31(0.35)       | 0.26(9.5, 0.15)          | 0.35(0.35, 0.12)          | 0.39(11.0)      | 0.43(0.10)       | 0.41(11.1, 0.04)          | 0.46(0.12, 0.07)  |

<sup>a</sup> In parentheses is the number of QTL identified by QP based on the SE model; <sup>b</sup> In parentheses is the gain in prediction accuracy with GWP over QP based on the SE model; <sup>c</sup> The first value in parentheses is the number of QTL identified by QP based on the ME model; and the second one the gain

with ME over SE for QP; <sup>d</sup> The first value in parentheses is the gain in accuracy with GWP over QP based on the ME model; the second one is the gain in accuracy with ME over SE using GWP; and the third one is the gain in accuracy with GWP over PP. Bold in parentheses indicates the number is not significant at  $\alpha = 0.05$ .
