# Supplementary material for: Accuracy of Across-Environment Genome-Wide Prediction in Maize Nested Association Mapping Populations
Source: PubMed Central journal article supplement (PMC3564986; doi:10.1534/g3.112.005066), 2013-02-01
Supplement: supp_3.2.263_TableS23.pdf [file supp_3.2.263_TableS23.pdf]

**Table S23 Accuracy of WP prediction for environment E1 with four ME GWP models in CV1**

| PopId | LL    |                    |                      |                      | LW    |                    |                     |                     |
|-------|-------|--------------------|----------------------|----------------------|-------|--------------------|---------------------|---------------------|
|       | SG-SR | SG-UR <sup>a</sup> | UG-SR <sup>b</sup>   | UG-UR <sup>c</sup>   | SG-SR | SG-UR <sup>a</sup> | UG-SR <sup>b</sup>  | UG-UR <sup>c</sup>  |
| 1     | 0.33  | 0.27(-0.17)        | 0.42(0.28)           | 0.42( <b>0.00</b> )  | 0.29  | 0.25(-0.16)        | 0.39(0.35)          | 0.39( <b>0.00</b> ) |
| 2     | 0.17  | 0.10(-0.42)        | 0.24(0.44)           | 0.24( <b>0.00</b> )  | 0.40  | 0.36(-0.10)        | 0.45(0.12)          | 0.45( <b>0.00</b> ) |
| 3     | 0.28  | 0.25(-0.08)        | 0.27(- <b>0.01</b> ) | 0.28(0.03)           | 0.55  | 0.52(-0.05)        | 0.59(0.06)          | 0.59( <b>0.00</b> ) |
| 4     | 0.48  | 0.44(-0.07)        | 0.50(0.05)           | 0.50( <b>0.00</b> )  | 0.49  | 0.47(-0.04)        | 0.53(0.08)          | 0.53( <b>0.00</b> ) |
| 5     | 0.32  | 0.24(-0.24)        | 0.39(0.22)           | 0.39( <b>0.00</b> )  | 0.20  | 0.12(-0.41)        | 0.30(0.49)          | 0.29(-0.02)         |
| 6     | 0.50  | 0.44(-0.11)        | 0.53(0.07)           | 0.53( <b>0.00</b> )  | 0.32  | 0.30(-0.07)        | 0.38(0.18)          | 0.38( <b>0.00</b> ) |
| 7     | 0.52  | 0.47(-0.09)        | 0.58(0.12)           | 0.57(- <b>0.01</b> ) | 0.48  | 0.44(-0.08)        | 0.52(0.09)          | 0.52( <b>0.00</b> ) |
| 8     | 0.31  | 0.24(-0.24)        | 0.37(0.19)           | 0.35(-0.05)          | 0.31  | 0.25(-0.19)        | 0.36(0.19)          | 0.38(0.04)          |
| 9     | 0.34  | 0.28(-0.19)        | 0.39(0.15)           | 0.38(-0.03)          | 0.17  | 0.12(-0.26)        | 0.35(1.11)          | 0.36(0.01)          |
| 10    | 0.47  | 0.42(-0.12)        | 0.50(0.05)           | 0.49(- <b>0.01</b> ) | 0.39  | 0.33(-0.15)        | 0.52(0.33)          | 0.52( <b>0.00</b> ) |
| 11    | 0.37  | 0.33(-0.12)        | 0.45(0.20)           | 0.45( <b>0.00</b> )  | 0.39  | 0.39(-0.02)        | 0.42(0.07)          | 0.42( <b>0.00</b> ) |
| 12    | 0.49  | 0.43(-0.11)        | 0.54(0.12)           | 0.54( <b>0.00</b> )  | 0.54  | 0.52(-0.05)        | 0.57(0.05)          | 0.57( <b>0.00</b> ) |
| 13    | 0.45  | 0.41(-0.09)        | 0.44(-0.03)          | 0.47(0.07)           | 0.50  | 0.46(-0.08)        | 0.52(0.05)          | 0.52( <b>0.00</b> ) |
| 14    | 0.38  | 0.31(-0.19)        | 0.43(0.11)           | 0.42( <b>0.00</b> )  | 0.47  | 0.43(-0.09)        | 0.50(0.07)          | 0.50( <b>0.00</b> ) |
| 15    | 0.28  | 0.20(-0.28)        | 0.32(0.12)           | 0.31(-0.03)          | 0.30  | 0.27(-0.11)        | 0.34(0.14)          | 0.34( <b>0.00</b> ) |
| 16    | 0.33  | 0.28(-0.15)        | 0.36(0.07)           | 0.36( <b>0.00</b> )  | 0.46  | 0.44(-0.04)        | 0.54(0.17)          | 0.54( <b>0.00</b> ) |
| 17    | 0.27  | 0.24(-0.10)        | 0.29(0.08)           | 0.29( <b>0.00</b> )  | 0.55  | 0.52(-0.05)        | 0.59(0.07)          | 0.59( <b>0.00</b> ) |
| 18    | 0.28  | 0.25(-0.12)        | 0.29(0.03)           | 0.28(-0.03)          | 0.39  | 0.38(-0.04)        | 0.43(0.10)          | 0.43( <b>0.00</b> ) |
| 19    | 0.37  | 0.31(-0.16)        | 0.41(0.12)           | 0.40(-0.04)          | 0.41  | 0.34(-0.16)        | 0.44(0.07)          | 0.44( <b>0.00</b> ) |
| 20    | 0.47  | 0.40(-0.15)        | 0.51(0.07)           | 0.48(-0.05)          | 0.47  | 0.44(-0.07)        | 0.50(0.06)          | 0.51(0.02)          |
| 21    | 0.49  | 0.44(-0.10)        | 0.50(0.02)           | 0.51( <b>0.01</b> )  | 0.47  | 0.46(-0.02)        | 0.47( <b>0.00</b> ) | 0.48(0.01)          |
| 22    | 0.35  | 0.30(-0.15)        | 0.42(0.19)           | 0.41(- <b>0.01</b> ) | 0.32  | 0.28(-0.11)        | 0.41(0.27)          | 0.42(0.02)          |
| 23    | 0.42  | 0.37(-0.12)        | 0.47(0.12)           | 0.46(-0.03)          | 0.29  | 0.22(-0.24)        | 0.43(0.47)          | 0.43( <b>0.00</b> ) |
| 24    | 0.45  | 0.41(-0.08)        | 0.45( <b>0.01</b> )  | 0.44(-0.02)          | 0.50  | 0.47(-0.06)        | 0.53(0.06)          | 0.53( <b>0.00</b> ) |
| 25    | 0.50  | 0.45(-0.10)        | 0.53(0.05)           | 0.51(-0.03)          | 0.45  | 0.42(-0.08)        | 0.48(0.06)          | 0.48( <b>0.00</b> ) |
| Mean  | 0.38  | 0.33(-0.14)        | 0.42(0.10)           | 0.42(0.00)           | 0.40  | 0.37(-0.09)        | 0.46(0.14)          | 0.46(0.00)          |

<sup>a</sup> In parentheses is the gain in prediction accuracy with SG-UR over SG-SR; <sup>b</sup> In parentheses is the gain in prediction accuracy with UG-SR over SG-SR;

<sup>c</sup> In parentheses is the gain in prediction accuracy with UG-UR over UG-SR; Bold in parentheses indicates the number is not significant at  $\alpha = 0.05$ .
