# Supplementary material for: Accuracy of Across-Environment Genome-Wide Prediction in Maize Nested Association Mapping Populations
Source: PubMed Central journal article supplement (PMC3564986; doi:10.1534/g3.112.005066), 2013-02-01
Supplement: supp_3.2.263_TableS24.pdf [file supp_3.2.263_TableS24.pdf]

**Table S24** Accuracy of WP prediction for environment E2 with four ME GWP models in CV1

| PopId | LL    |                     |                     |                      | LW    |                    |                     |                     |
|-------|-------|---------------------|---------------------|----------------------|-------|--------------------|---------------------|---------------------|
|       | SG-SR | SG-UR <sup>a</sup>  | UG-SR <sup>b</sup>  | UG-UR <sup>c</sup>   | SG-SR | SG-UR <sup>a</sup> | UG-SR <sup>b</sup>  | UG-UR <sup>c</sup>  |
| 1     | 0.67  | 0.67( <b>0.00</b> ) | 0.67( <b>0.00</b> ) | 0.67( <b>0.00</b> )  | 0.46  | 0.43(-0.06)        | 0.50(0.09)          | 0.50( <b>0.00</b> ) |
| 2     | 0.40  | 0.36(-0.10)         | 0.42(0.04)          | 0.40(-0.03)          | 0.49  | 0.46(-0.07)        | 0.53(0.07)          | 0.53( <b>0.00</b> ) |
| 3     | 0.17  | 0.13(-0.21)         | 0.19(0.14)          | 0.18(-0.06)          | 0.59  | 0.57(-0.04)        | 0.61(0.03)          | 0.61( <b>0.00</b> ) |
| 4     | 0.56  | 0.54(-0.04)         | 0.57(0.03)          | 0.57( <b>0.00</b> )  | 0.59  | 0.57(-0.03)        | 0.62(0.04)          | 0.62( <b>0.00</b> ) |
| 5     | 0.50  | 0.47(-0.07)         | 0.51(0.02)          | 0.51( <b>0.00</b> )  | 0.45  | 0.39(-0.12)        | 0.48(0.07)          | 0.46(-0.03)         |
| 6     | 0.49  | 0.43(-0.11)         | 0.51(0.06)          | 0.50(-0.03)          | 0.33  | 0.32(-0.04)        | 0.34(0.03)          | 0.34( <b>0.00</b> ) |
| 7     | 0.42  | 0.36(-0.14)         | 0.52(0.23)          | 0.51(-0.03)          | 0.58  | 0.54(-0.06)        | 0.61(0.06)          | 0.62(0.01)          |
| 8     | 0.35  | 0.27(-0.23)         | 0.40(0.14)          | 0.37(-0.08)          | 0.35  | 0.29(-0.17)        | 0.41(0.17)          | 0.42(0.03)          |
| 9     | 0.30  | 0.25(-0.19)         | 0.34(0.12)          | 0.32(-0.07)          | 0.44  | 0.41(-0.06)        | 0.44( <b>0.00</b> ) | 0.43(-0.02)         |
| 10    | 0.50  | 0.43(-0.12)         | 0.52(0.05)          | 0.51(-0.03)          | 0.36  | 0.26(-0.26)        | 0.39(0.08)          | 0.36(-0.07)         |
| 11    | 0.52  | 0.50(-0.05)         | 0.55(0.04)          | 0.55( <b>0.00</b> )  | 0.40  | 0.39(-0.03)        | 0.43(0.07)          | 0.43( <b>0.00</b> ) |
| 12    | 0.56  | 0.51(-0.10)         | 0.60(0.08)          | 0.59(-0.02)          | 0.58  | 0.56(-0.03)        | 0.61(0.05)          | 0.61( <b>0.00</b> ) |
| 13    | 0.40  | 0.32(-0.20)         | 0.44(0.08)          | 0.45(0.03)           | 0.39  | 0.32(-0.19)        | 0.47(0.20)          | 0.47( <b>0.00</b> ) |
| 14    | 0.42  | 0.38(-0.11)         | 0.44(0.05)          | 0.42(-0.04)          | 0.27  | 0.19(-0.29)        | 0.37(0.40)          | 0.36(-0.04)         |
| 15    | 0.46  | 0.43(-0.08)         | 0.45(-0.03)         | 0.46(0.02)           | 0.55  | 0.53(-0.04)        | 0.58(0.05)          | 0.58( <b>0.00</b> ) |
| 16    | 0.31  | 0.26(-0.16)         | 0.33(0.06)          | 0.32(-0.02)          | 0.56  | 0.55(-0.02)        | 0.58(0.03)          | 0.59(0.01)          |
| 17    | 0.13  | 0.08(-0.40)         | 0.20(0.52)          | 0.19(- <b>0.02</b> ) | 0.61  | 0.59(-0.03)        | 0.64(0.04)          | 0.64( <b>0.00</b> ) |
| 18    | 0.29  | 0.23(-0.20)         | 0.32(0.12)          | 0.31(-0.03)          | 0.30  | 0.27(-0.08)        | 0.42(0.42)          | 0.43( <b>0.01</b> ) |
| 19    | 0.28  | 0.20(-0.29)         | 0.34(0.20)          | 0.30(-0.12)          | 0.40  | 0.35(-0.11)        | 0.45(0.14)          | 0.46(0.02)          |
| 20    | 0.52  | 0.46(-0.12)         | 0.55(0.05)          | 0.54(-0.02)          | 0.53  | 0.50(-0.07)        | 0.56(0.04)          | 0.56( <b>0.00</b> ) |
| 21    | 0.58  | 0.54(-0.08)         | 0.61(0.04)          | 0.61( <b>0.00</b> )  | 0.35  | 0.32(-0.09)        | 0.41(0.19)          | 0.40(-0.02)         |
| 22    | 0.49  | 0.47(-0.05)         | 0.50(0.02)          | 0.50( <b>0.00</b> )  | 0.58  | 0.56(-0.03)        | 0.59(0.02)          | 0.60(0.01)          |
| 23    | 0.43  | 0.39(-0.10)         | 0.47(0.09)          | 0.46(- <b>0.01</b> ) | 0.36  | 0.32(-0.12)        | 0.40(0.11)          | 0.41(0.01)          |
| 24    | 0.16  | 0.08(-0.53)         | 0.27(0.63)          | 0.25(-0.06)          | 0.42  | 0.39(-0.08)        | 0.48(0.14)          | 0.48( <b>0.00</b> ) |
| 25    | 0.38  | 0.31(-0.20)         | 0.45(0.17)          | 0.42(-0.07)          | 0.47  | 0.42(-0.12)        | 0.48(0.01)          | 0.45(-0.05)         |
| Mean  | 0.41  | 0.36(-0.12)         | 0.45(0.08)          | 0.44(-0.02)          | 0.46  | 0.42(-0.08)        | 0.50(0.09)          | 0.49(-0.01)         |

<sup>a</sup> In parentheses is the gain in prediction accuracy with SG-UR over SG-SR; <sup>b</sup> In parentheses is the gain in prediction accuracy with UG-SR over SG-SR;

<sup>c</sup> In parentheses is the gain in prediction accuracy with UG-UR over UG-SR; Bold in parentheses indicates the number is not significant at  $\alpha = 0.05$ .
