# Supplementary material for: Accuracy of Across-Environment Genome-Wide Prediction in Maize Nested Association Mapping Populations
Source: PubMed Central journal article supplement (PMC3564986; doi:10.1534/g3.112.005066), 2013-02-01
Supplement: supp_3.2.263_TableS25.pdf [file supp_3.2.263_TableS25.pdf]

**Table S25 Accuracy of WP prediction for environment E3 with four ME GWP models in CV1**

| PopId | LL    |                    |                    |                     | LW    |                    |                    |                     |
|-------|-------|--------------------|--------------------|---------------------|-------|--------------------|--------------------|---------------------|
|       | SG-SR | SG-UR <sup>a</sup> | UG-SR <sup>b</sup> | UG-UR <sup>c</sup>  | SG-SR | SG-UR <sup>a</sup> | UG-SR <sup>b</sup> | UG-UR <sup>c</sup>  |
| 1     | 0.51  | 0.47(-0.06)        | 0.55(0.09)         | 0.55( <b>0.00</b> ) | 0.36  | 0.33(-0.08)        | 0.41(0.13)         | 0.41( <b>0.00</b> ) |
| 2     | 0.35  | 0.29(-0.17)        | 0.38(0.10)         | 0.36(-0.06)         | 0.52  | 0.49(-0.05)        | 0.55(0.06)         | 0.55( <b>0.00</b> ) |
| 3     | 0.24  | 0.20(-0.17)        | 0.26(0.10)         | 0.26( <b>0.00</b> ) | 0.27  | 0.23(-0.18)        | 0.37(0.35)         | 0.37( <b>0.00</b> ) |
| 4     | 0.50  | 0.45(-0.10)        | 0.55(0.10)         | 0.54(-0.02)         | 0.18  | 0.12(-0.32)        | 0.28(0.56)         | 0.29(0.00)          |
| 5     | 0.44  | 0.39(-0.11)        | 0.46(0.05)         | 0.46( <b>0.00</b> ) | 0.30  | 0.22(-0.26)        | 0.39(0.29)         | 0.39( <b>0.00</b> ) |
| 6     | 0.47  | 0.40(-0.15)        | 0.54(0.14)         | 0.54( <b>0.00</b> ) | 0.31  | 0.29(-0.07)        | 0.35(0.15)         | 0.35( <b>0.00</b> ) |
| 7     | 0.49  | 0.44(-0.10)        | 0.55(0.13)         | 0.55( <b>0.00</b> ) | 0.42  | 0.38(-0.10)        | 0.49(0.17)         | 0.50(0.01)          |
| 8     | 0.32  | 0.24(-0.26)        | 0.38(0.18)         | 0.35(-0.07)         | 0.48  | 0.44(-0.07)        | 0.49(0.03)         | 0.49( <b>0.00</b> ) |
| 9     | 0.42  | 0.36(-0.13)        | 0.45(0.07)         | 0.45( <b>0.00</b> ) | 0.45  | 0.43(-0.05)        | 0.48(0.07)         | 0.48( <b>0.00</b> ) |
| 10    | 0.42  | 0.34(-0.20)        | 0.48(0.13)         | 0.48( <b>0.00</b> ) | 0.56  | 0.52(-0.08)        | 0.58(0.04)         | 0.56(-0.04)         |
| 11    | 0.54  | 0.51(-0.05)        | 0.56(0.04)         | 0.56( <b>0.00</b> ) | 0.36  | 0.35(-0.03)        | 0.41(0.14)         | 0.41( <b>0.00</b> ) |
| 12    | 0.43  | 0.35(-0.17)        | 0.49(0.15)         | 0.50(0.02)          | 0.28  | 0.23(-0.17)        | 0.37(0.35)         | 0.38(0.00)          |
| 13    | 0.41  | 0.31(-0.25)        | 0.45(0.09)         | 0.43(-0.05)         | 0.26  | 0.16(-0.37)        | 0.35(0.38)         | 0.35( <b>0.00</b> ) |
| 14    | 0.31  | 0.23(-0.24)        | 0.35(0.15)         | 0.35( <b>0.00</b> ) | 0.32  | 0.27(-0.16)        | 0.42(0.28)         | 0.42( <b>0.00</b> ) |
| 15    | 0.25  | 0.15(-0.39)        | 0.30(0.21)         | 0.30( <b>0.00</b> ) | 0.40  | 0.37(-0.07)        | 0.47(0.19)         | 0.48(0.01)          |
| 16    | 0.32  | 0.28(-0.15)        | 0.34(0.05)         | 0.33(-0.02)         | 0.36  | 0.34(-0.06)        | 0.45(0.26)         | 0.45( <b>0.00</b> ) |
| 17    | 0.32  | 0.28(-0.13)        | 0.37(0.14)         | 0.37( <b>0.00</b> ) | 0.38  | 0.33(-0.13)        | 0.45(0.17)         | 0.45( <b>0.00</b> ) |
| 18    | 0.17  | 0.12(-0.28)        | 0.20(0.16)         | 0.21( <b>0.02</b> ) | 0.33  | 0.31(-0.06)        | 0.39(0.19)         | 0.39( <b>0.00</b> ) |
| 19    | 0.46  | 0.41(-0.11)        | 0.48(0.06)         | 0.47(-0.03)         | 0.44  | 0.40(-0.09)        | 0.46(0.05)         | 0.46( <b>0.00</b> ) |
| 20    | 0.34  | 0.25(-0.27)        | 0.40(0.19)         | 0.39(-0.02)         | 0.43  | 0.39(-0.09)        | 0.47(0.08)         | 0.46(-0.01)         |
| 21    | 0.47  | 0.41(-0.14)        | 0.53(0.12)         | 0.54(0.02)          | 0.38  | 0.37(-0.04)        | 0.42(0.11)         | 0.42( <b>0.00</b> ) |
| 22    | 0.38  | 0.34(-0.10)        | 0.41(0.08)         | 0.40(-0.01)         | 0.35  | 0.31(-0.09)        | 0.42(0.20)         | 0.43(0.02)          |
| 23    | 0.32  | 0.26(-0.19)        | 0.41(0.30)         | 0.42(0.01)          | 0.38  | 0.33(-0.13)        | 0.43(0.13)         | 0.42(-0.02)         |
| 24    | 0.26  | 0.19(-0.25)        | 0.30(0.16)         | 0.27(-0.09)         | 0.41  | 0.37(-0.10)        | 0.47(0.13)         | 0.48(0.02)          |
| 25    | 0.37  | 0.28(-0.25)        | 0.44(0.21)         | 0.40(-0.09)         | 0.29  | 0.24(-0.15)        | 0.33(0.15)         | 0.34(0.02)          |
| Mean  | 0.38  | 0.32(-0.16)        | 0.43(0.12)         | 0.42(-0.02)         | 0.37  | 0.33(-0.11)        | 0.43(0.16)         | 0.43(0.00)          |

<sup>a</sup> In parentheses is the gain in prediction accuracy with SG-UR over SG-SR; <sup>b</sup> In parentheses is the gain in prediction accuracy with UG-SR over SG-SR;

<sup>c</sup> In parentheses is the gain in prediction accuracy with UG-UR over UG-SR; Bold in parentheses indicates the number is not significant at  $\alpha = 0.05$ .
