# Supplementary material for: Accuracy of Across-Environment Genome-Wide Prediction in Maize Nested Association Mapping Populations
Source: PubMed Central journal article supplement (PMC3564986; doi:10.1534/g3.112.005066), 2013-02-01
Supplement: supp_3.2.263_TableS29.pdf [file supp_3.2.263_TableS29.pdf]

**Table S29 Accuracy of AP prediction for environment E3 with four ME GWP models in CV1**

| PopId | LL    |                     |                      |                     | LW    |                     |                     |                     |
|-------|-------|---------------------|----------------------|---------------------|-------|---------------------|---------------------|---------------------|
|       | SG-SR | SG-UR <sup>a</sup>  | UG-SR <sup>b</sup>   | UG-UR <sup>c</sup>  | SG-SR | SG-UR <sup>a</sup>  | UG-SR <sup>b</sup>  | UG-UR <sup>c</sup>  |
| 1     | 0.37  | 0.37( <b>0.00</b> ) | 0.38(0.01)           | 0.37(-0.01)         | 0.24  | 0.23(-0.04)         | 0.25(0.04)          | 0.25( <b>0.00</b> ) |
| 2     | 0.27  | 0.25(-0.09)         | 0.31(0.12)           | 0.30(-0.03)         | 0.46  | 0.45(-0.02)         | 0.47(0.03)          | 0.47( <b>0.00</b> ) |
| 3     | 0.22  | 0.23(0.04)          | 0.20(-0.11)          | 0.21(0.07)          | 0.37  | 0.37( <b>0.00</b> ) | 0.34(-0.07)         | 0.36(0.04)          |
| 4     | 0.42  | 0.42( <b>0.00</b> ) | 0.40(-0.04)          | 0.41(0.03)          | 0.22  | 0.21(-0.04)         | 0.24(0.08)          | 0.24( <b>0.00</b> ) |
| 5     | 0.20  | 0.19(-0.05)         | 0.21(0.07)           | 0.21( <b>0.00</b> ) | 0.44  | 0.44( <b>0.00</b> ) | 0.42(-0.03)         | 0.43( <b>0.01</b> ) |
| 6     | 0.47  | 0.46(-0.01)         | 0.46(- <b>0.01</b> ) | 0.46( <b>0.00</b> ) | 0.26  | 0.26( <b>0.00</b> ) | 0.27( <b>0.01</b> ) | 0.26(-0.02)         |
| 7     | 0.20  | 0.19(-0.03)         | 0.19(-0.06)          | 0.20(0.04)          | 0.32  | 0.31(-0.04)         | 0.34(0.06)          | 0.33(-0.02)         |
| 8     | 0.29  | 0.27(-0.04)         | 0.30(0.06)           | 0.29(-0.03)         | 0.27  | 0.27( <b>0.00</b> ) | 0.28(0.03)          | 0.28( <b>0.00</b> ) |
| 9     | 0.35  | 0.35( <b>0.00</b> ) | 0.35( <b>0.00</b> )  | 0.36(0.02)          | 0.31  | 0.32(0.02)          | 0.29(-0.09)         | 0.30(0.04)          |
| 10    | 0.47  | 0.46(-0.01)         | 0.45(-0.05)          | 0.46(0.04)          | 0.56  | 0.56( <b>0.00</b> ) | 0.55(-0.01)         | 0.55( <b>0.00</b> ) |
| 11    | 0.22  | 0.21(-0.06)         | 0.23(0.05)           | 0.23( <b>0.00</b> ) | 0.26  | 0.25(-0.02)         | 0.27(0.06)          | 0.27( <b>0.00</b> ) |
| 12    | 0.32  | 0.31(-0.02)         | 0.30(-0.04)          | 0.31( <b>0.01</b> ) | 0.34  | 0.34( <b>0.00</b> ) | 0.34( <b>0.00</b> ) | 0.34( <b>0.00</b> ) |
| 13    | 0.36  | 0.34(-0.06)         | 0.41(0.12)           | 0.39(-0.05)         | 0.40  | 0.40( <b>0.00</b> ) | 0.37(-0.08)         | 0.38(0.03)          |
| 14    | 0.24  | 0.24( <b>0.00</b> ) | 0.24( <b>0.00</b> )  | 0.24( <b>0.00</b> ) | 0.26  | 0.25(-0.05)         | 0.29(0.13)          | 0.28(-0.04)         |
| 15    | 0.24  | 0.23(-0.06)         | 0.26(0.06)           | 0.25(-0.01)         | 0.49  | 0.48(-0.01)         | 0.50(0.01)          | 0.50( <b>0.00</b> ) |
| 16    | 0.16  | 0.14(-0.09)         | 0.17(0.09)           | 0.17( <b>0.00</b> ) | 0.46  | 0.44(-0.04)         | 0.50(0.11)          | 0.49(-0.03)         |
| 17    | 0.29  | 0.28(-0.04)         | 0.29( <b>0.00</b> )  | 0.29( <b>0.00</b> ) | 0.30  | 0.28(-0.06)         | 0.34(0.13)          | 0.33(-0.03)         |
| 18    | 0.11  | 0.09(-0.14)         | 0.14(0.29)           | 0.13(-0.07)         | 0.32  | 0.32( <b>0.00</b> ) | 0.33(0.02)          | 0.33( <b>0.00</b> ) |
| 19    | 0.36  | 0.35(-0.01)         | 0.35(-0.02)          | 0.35( <b>0.00</b> ) | 0.29  | 0.28(-0.01)         | 0.30(0.05)          | 0.30( <b>0.00</b> ) |
| 20    | 0.36  | 0.34(-0.06)         | 0.38(0.05)           | 0.38( <b>0.00</b> ) | 0.44  | 0.42(-0.03)         | 0.46(0.06)          | 0.46( <b>0.00</b> ) |
| 21    | 0.44  | 0.42(-0.05)         | 0.48(0.08)           | 0.46(-0.03)         | 0.40  | 0.39(-0.02)         | 0.41(0.03)          | 0.41( <b>0.00</b> ) |
| 22    | 0.20  | 0.19(-0.08)         | 0.22(0.08)           | 0.21(-0.02)         | 0.26  | 0.25(-0.02)         | 0.27(0.04)          | 0.26(-0.01)         |
| 23    | 0.22  | 0.22( <b>0.00</b> ) | 0.22( <b>0.00</b> )  | 0.23(0.01)          | 0.27  | 0.26(-0.03)         | 0.28(0.05)          | 0.28( <b>0.00</b> ) |
| 24    | 0.19  | 0.19( <b>0.00</b> ) | 0.18(-0.04)          | 0.19(0.04)          | 0.36  | 0.35(-0.03)         | 0.39(0.08)          | 0.38(-0.03)         |
| 25    | 0.39  | 0.40(0.01)          | 0.37(-0.06)          | 0.38(0.02)          | 0.24  | 0.23(-0.02)         | 0.23(-0.04)         | 0.24(0.03)          |
| Mean  | 0.29  | 0.29(0.00)          | 0.30(0.01)           | 0.30(0.00)          | 0.34  | 0.33(-0.02)         | 0.35(0.03)          | 0.35(0.00)          |

<sup>a</sup> In parentheses is the gain in prediction accuracy with SG-UR over SG-SR; <sup>b</sup> In parentheses is the gain in prediction accuracy with UG-SR over SG-SR;

<sup>c</sup> In parentheses is the gain in prediction accuracy with UG-UR over UG-SR; Bold in parentheses indicates the number is not significant at  $\alpha = 0.05$ .
