# Supplementary material for: Accuracy of Across-Environment Genome-Wide Prediction in Maize Nested Association Mapping Populations
Source: PubMed Central journal article supplement (PMC3564986; doi:10.1534/g3.112.005066), 2013-02-01
Supplement: supp_3.2.263_TableS30.pdf [file supp_3.2.263_TableS30.pdf]

**Table S30 Accuracy of AP prediction for environment E4 with four ME GWP models in CV1**

| PopId | LL    |                     |                     |                     | LW    |                     |                     |                     |
|-------|-------|---------------------|---------------------|---------------------|-------|---------------------|---------------------|---------------------|
|       | SG-SR | SG-UR <sup>a</sup>  | UG-SR <sup>b</sup>  | UG-UR <sup>c</sup>  | SG-SR | SG-UR <sup>a</sup>  | UG-SR <sup>b</sup>  | UG-UR <sup>c</sup>  |
| 1     | 0.26  | 0.26( <b>0.00</b> ) | 0.26( <b>0.00</b> ) | 0.27(0.03)          | 0.31  | 0.30(-0.03)         | 0.31( <b>0.00</b> ) | 0.31( <b>0.00</b> ) |
| 2     | 0.25  | 0.24(-0.03)         | 0.23(-0.09)         | 0.23( <b>0.00</b> ) | 0.43  | 0.42(-0.01)         | 0.43( <b>0.00</b> ) | 0.43( <b>0.00</b> ) |
| 3     | 0.24  | 0.23(-0.06)         | 0.24( <b>0.00</b> ) | 0.25(0.02)          | 0.39  | 0.39( <b>0.00</b> ) | 0.39( <b>0.00</b> ) | 0.40(0.03)          |
| 4     | 0.42  | 0.42( <b>0.00</b> ) | 0.43(0.02)          | 0.43( <b>0.00</b> ) | 0.29  | 0.29( <b>0.00</b> ) | 0.30(0.03)          | 0.29(-0.02)         |
| 5     | 0.38  | 0.38( <b>0.00</b> ) | 0.36(-0.05)         | 0.38(0.04)          | 0.33  | 0.32(-0.04)         | 0.36(0.08)          | 0.36( <b>0.00</b> ) |
| 6     | 0.46  | 0.44(-0.03)         | 0.48(0.06)          | 0.48( <b>0.00</b> ) | 0.33  | 0.32(-0.02)         | 0.33( <b>0.00</b> ) | 0.33( <b>0.00</b> ) |
| 7     | 0.32  | 0.31(-0.03)         | 0.30(-0.06)         | 0.31(0.04)          | 0.52  | 0.51(-0.01)         | 0.53(0.02)          | 0.53( <b>0.00</b> ) |
| 8     | 0.34  | 0.32(-0.05)         | 0.37(0.07)          | 0.35(-0.04)         | 0.39  | 0.39( <b>0.00</b> ) | 0.40(0.02)          | 0.40( <b>0.00</b> ) |
| 9     | 0.35  | 0.35( <b>0.00</b> ) | 0.35( <b>0.00</b> ) | 0.36(0.02)          | 0.40  | 0.39(-0.04)         | 0.42(0.04)          | 0.41(-0.01)         |
| 10    | 0.46  | 0.44(-0.04)         | 0.47(0.02)          | 0.48(0.02)          | 0.53  | 0.52(-0.02)         | 0.55(0.02)          | 0.54(-0.01)         |
| 11    | 0.27  | 0.27( <b>0.00</b> ) | 0.27( <b>0.00</b> ) | 0.27( <b>0.00</b> ) | 0.36  | 0.36( <b>0.00</b> ) | 0.35(-0.03)         | 0.36(0.02)          |
| 12    | 0.31  | 0.28(-0.10)         | 0.35(0.13)          | 0.34(-0.03)         | 0.57  | 0.57( <b>0.00</b> ) | 0.58(0.01)          | 0.58( <b>0.00</b> ) |
| 13    | 0.16  | 0.14(-0.11)         | 0.18(0.14)          | 0.16(-0.08)         | 0.32  | 0.29(-0.07)         | 0.35(0.11)          | 0.35( <b>0.00</b> ) |
| 14    | 0.35  | 0.35( <b>0.00</b> ) | 0.34(-0.04)         | 0.33(-0.01)         | 0.33  | 0.33( <b>0.00</b> ) | 0.33( <b>0.00</b> ) | 0.33( <b>0.00</b> ) |
| 15    | 0.20  | 0.19(-0.07)         | 0.20( <b>0.00</b> ) | 0.21(0.02)          | 0.60  | 0.59(-0.00)         | 0.60( <b>0.00</b> ) | 0.60( <b>0.00</b> ) |
| 16    | 0.23  | 0.21(-0.07)         | 0.25(0.11)          | 0.24(-0.04)         | 0.57  | 0.56(-0.02)         | 0.58(0.02)          | 0.58( <b>0.00</b> ) |
| 17    | 0.25  | 0.25( <b>0.00</b> ) | 0.24(-0.06)         | 0.24( <b>0.00</b> ) | 0.53  | 0.53( <b>0.00</b> ) | 0.52(-0.01)         | 0.53(0.01)          |
| 18    | 0.13  | 0.12(-0.03)         | 0.13( <b>0.00</b> ) | 0.13( <b>0.00</b> ) | 0.38  | 0.38( <b>0.00</b> ) | 0.37(-0.02)         | 0.38(0.02)          |
| 19    | 0.19  | 0.18(-0.01)         | 0.19( <b>0.00</b> ) | 0.19( <b>0.00</b> ) | 0.36  | 0.37(0.01)          | 0.36( <b>0.00</b> ) | 0.36( <b>0.00</b> ) |
| 20    | 0.41  | 0.39(-0.04)         | 0.42(0.02)          | 0.41(-0.01)         | 0.52  | 0.51(-0.01)         | 0.53(0.03)          | 0.52(-0.01)         |
| 21    | 0.52  | 0.52( <b>0.00</b> ) | 0.51(-0.03)         | 0.52(0.01)          | 0.41  | 0.39(-0.07)         | 0.45(0.09)          | 0.44(-0.04)         |
| 22    | 0.25  | 0.25( <b>0.00</b> ) | 0.23(-0.05)         | 0.24(0.03)          | 0.40  | 0.40( <b>0.00</b> ) | 0.40( <b>0.00</b> ) | 0.40( <b>0.00</b> ) |
| 23    | 0.13  | 0.13( <b>0.00</b> ) | 0.12(-0.06)         | 0.13(0.07)          | 0.30  | 0.29(-0.01)         | 0.30( <b>0.00</b> ) | 0.30( <b>0.00</b> ) |
| 24    | 0.29  | 0.30(0.04)          | 0.26(-0.10)         | 0.28(0.06)          | 0.50  | 0.49(-0.02)         | 0.50( <b>0.00</b> ) | 0.50( <b>0.00</b> ) |
| 25    | 0.29  | 0.27(-0.07)         | 0.31(0.06)          | 0.30(-0.01)         | 0.44  | 0.45(0.01)          | 0.42(-0.05)         | 0.43(0.03)          |
| Mean  | 0.30  | 0.29(-0.03)         | 0.30(0.00)          | 0.30(0.00)          | 0.42  | 0.41(-0.02)         | 0.43(0.01)          | 0.43(0.00)          |

<sup>a</sup> In parentheses is the gain in prediction accuracy with SG-UR over SG-SR; <sup>b</sup> In parentheses is the gain in prediction accuracy with UG-SR over SG-SR;

<sup>c</sup> In parentheses is the gain in prediction accuracy with UG-UR over UG-SR; Bold in parentheses indicates the number is not significant at  $\alpha = 0.05$ .
