# Supplementary material for: Accuracy of Across-Environment Genome-Wide Prediction in Maize Nested Association Mapping Populations
Source: PubMed Central journal article supplement (PMC3564986; doi:10.1534/g3.112.005066), 2013-02-01
Supplement: supp_3.2.263_TableS31.pdf [file supp_3.2.263_TableS31.pdf]

**Table S31 Accuracy of WP prediction for environment E1 with four ME GWP models in CV2**

| PopId | LL    |                      |                    |                      | LW    |                     |                    |                      |
|-------|-------|----------------------|--------------------|----------------------|-------|---------------------|--------------------|----------------------|
|       | SG-SR | SG-UR <sup>a</sup>   | UG-SR <sup>b</sup> | UG-UR <sup>c</sup>   | SG-SR | SG-UR <sup>a</sup>  | UG-SR <sup>b</sup> | UG-UR <sup>c</sup>   |
| 1     | 0.33  | 0.30(-0.08)          | 0.45(0.40)         | 0.45( <b>0.00</b> )  | 0.31  | 0.29(-0.07)         | 0.49(0.59)         | 0.49( <b>0.00</b> )  |
| 2     | 0.18  | 0.16(-0.08)          | 0.41(1.35)         | 0.42( <b>0.01</b> )  | 0.40  | 0.38(-0.04)         | 0.55(0.39)         | 0.55( <b>0.00</b> )  |
| 3     | 0.26  | 0.25(- <b>0.02</b> ) | 0.36(0.42)         | 0.37( <b>0.01</b> )  | 0.56  | 0.55(-0.02)         | 0.68(0.21)         | 0.68( <b>0.00</b> )  |
| 4     | 0.49  | 0.47(-0.03)          | 0.60(0.24)         | 0.60( <b>0.00</b> )  | 0.50  | 0.49(-0.02)         | 0.61(0.22)         | 0.61( <b>0.00</b> )  |
| 5     | 0.33  | 0.31(-0.06)          | 0.53(0.60)         | 0.54(0.01)           | 0.21  | 0.19(-0.08)         | 0.47(1.26)         | 0.46(-0.01)          |
| 6     | 0.50  | 0.49(-0.03)          | 0.59(0.18)         | 0.59( <b>0.00</b> )  | 0.31  | 0.30(-0.04)         | 0.43(0.40)         | 0.43( <b>0.00</b> )  |
| 7     | 0.52  | 0.51(-0.02)          | 0.67(0.30)         | 0.67( <b>0.00</b> )  | 0.48  | 0.47(-0.02)         | 0.61(0.28)         | 0.61( <b>0.00</b> )  |
| 8     | 0.28  | 0.28( <b>0.00</b> )  | 0.52(0.81)         | 0.51(- <b>0.01</b> ) | 0.30  | 0.27(-0.08)         | 0.49(0.64)         | 0.49( <b>0.00</b> )  |
| 9     | 0.35  | 0.33(-0.06)          | 0.50(0.43)         | 0.50( <b>0.00</b> )  | 0.18  | 0.16(-0.09)         | 0.42(1.37)         | 0.42( <b>0.00</b> )  |
| 10    | 0.46  | 0.47( <b>0.01</b> )  | 0.64(0.38)         | 0.64( <b>0.00</b> )  | 0.37  | 0.35(-0.04)         | 0.62(0.69)         | 0.62( <b>0.00</b> )  |
| 11    | 0.40  | 0.38(-0.04)          | 0.56(0.39)         | 0.56( <b>0.00</b> )  | 0.40  | 0.39(-0.01)         | 0.48(0.21)         | 0.48( <b>0.00</b> )  |
| 12    | 0.50  | 0.49(-0.02)          | 0.65(0.31)         | 0.65( <b>0.00</b> )  | 0.54  | 0.54( <b>0.00</b> ) | 0.64(0.18)         | 0.64( <b>0.00</b> )  |
| 13    | 0.45  | 0.45( <b>0.00</b> )  | 0.65(0.43)         | 0.64(- <b>0.01</b> ) | 0.49  | 0.48(-0.02)         | 0.62(0.26)         | 0.61(-0.01)          |
| 14    | 0.36  | 0.35(-0.03)          | 0.56(0.56)         | 0.55(-0.01)          | 0.44  | 0.44( <b>0.00</b> ) | 0.62(0.40)         | 0.62( <b>0.00</b> )  |
| 15    | 0.28  | 0.25(-0.11)          | 0.48(0.72)         | 0.47(-0.02)          | 0.30  | 0.29(-0.03)         | 0.44(0.45)         | 0.43(- <b>0.01</b> ) |
| 16    | 0.34  | 0.32(-0.05)          | 0.48(0.43)         | 0.48( <b>0.00</b> )  | 0.45  | 0.44(-0.02)         | 0.56(0.23)         | 0.56( <b>0.00</b> )  |
| 17    | 0.27  | 0.26(-0.03)          | 0.40(0.45)         | 0.39(- <b>0.01</b> ) | 0.55  | 0.55( <b>0.00</b> ) | 0.68(0.24)         | 0.68( <b>0.00</b> )  |
| 18    | 0.27  | 0.27( <b>0.00</b> )  | 0.36(0.31)         | 0.36( <b>0.00</b> )  | 0.40  | 0.40( <b>0.00</b> ) | 0.47(0.16)         | 0.47( <b>0.00</b> )  |
| 19    | 0.37  | 0.35(-0.06)          | 0.53(0.45)         | 0.52(-0.03)          | 0.41  | 0.40(-0.02)         | 0.58(0.42)         | 0.58( <b>0.00</b> )  |
| 20    | 0.47  | 0.45(-0.05)          | 0.61(0.30)         | 0.61( <b>0.00</b> )  | 0.48  | 0.48( <b>0.00</b> ) | 0.59(0.24)         | 0.60(0.01)           |
| 21    | 0.48  | 0.47(- <b>0.01</b> ) | 0.60(0.26)         | 0.61(0.01)           | 0.47  | 0.47( <b>0.00</b> ) | 0.53(0.14)         | 0.54(0.01)           |
| 22    | 0.36  | 0.34(-0.06)          | 0.51(0.42)         | 0.51( <b>0.00</b> )  | 0.31  | 0.30(-0.05)         | 0.47(0.52)         | 0.47( <b>0.00</b> )  |
| 23    | 0.44  | 0.42(-0.04)          | 0.55(0.25)         | 0.54(-0.01)          | 0.30  | 0.30( <b>0.00</b> ) | 0.54(0.80)         | 0.54( <b>0.00</b> )  |
| 24    | 0.48  | 0.47(-0.03)          | 0.58(0.21)         | 0.57(-0.02)          | 0.50  | 0.49(-0.02)         | 0.64(0.29)         | 0.64( <b>0.00</b> )  |
| 25    | 0.50  | 0.48(-0.03)          | 0.61(0.24)         | 0.61( <b>0.00</b> )  | 0.47  | 0.46(-0.01)         | 0.61(0.30)         | 0.60(-0.01)          |
| Mean  | 0.39  | 0.37(-0.04)          | 0.54(0.39)         | 0.53(-0.01)          | 0.41  | 0.39(-0.02)         | 0.55(0.36)         | 0.55(0.00)           |

<sup>a</sup> In parentheses is the gain in prediction accuracy with SG-UR over SG-SR; <sup>b</sup> In parentheses is the gain in prediction accuracy with UG-SR over SG-SR;

<sup>c</sup> In parentheses is the gain in prediction accuracy with UG-UR over UG-SR; Bold in parentheses indicates the number is not significant at  $\alpha = 0.05$ .
