# Supplementary material for: Accuracy of Across-Environment Genome-Wide Prediction in Maize Nested Association Mapping Populations
Source: PubMed Central journal article supplement (PMC3564986; doi:10.1534/g3.112.005066), 2013-02-01
Supplement: supp_3.2.263_TableS32.pdf [file supp_3.2.263_TableS32.pdf]

**Table S32 Accuracy of WP prediction for environment E2 with four ME GWP models in CV2**

| PopId | LL    |                     |                    |                      | LW    |                     |                    |                     |
|-------|-------|---------------------|--------------------|----------------------|-------|---------------------|--------------------|---------------------|
|       | SG-SR | SG-UR <sup>a</sup>  | UG-SR <sup>b</sup> | UG-UR <sup>c</sup>   | SG-SR | SG-UR <sup>a</sup>  | UG-SR <sup>b</sup> | UG-UR <sup>c</sup>  |
| 1     | 0.67  | 0.67( <b>0.00</b> ) | 0.74(0.11)         | 0.75( <b>0.00</b> )  | 0.46  | 0.45(-0.02)         | 0.57(0.25)         | 0.57( <b>0.00</b> ) |
| 2     | 0.40  | 0.39(-0.03)         | 0.57(0.42)         | 0.56(-0.02)          | 0.48  | 0.47(-0.02)         | 0.64(0.33)         | 0.64( <b>0.00</b> ) |
| 3     | 0.20  | 0.19(-0.05)         | 0.31(0.56)         | 0.30(- <b>0.01</b> ) | 0.60  | 0.59(-0.01)         | 0.70(0.17)         | 0.70( <b>0.00</b> ) |
| 4     | 0.56  | 0.56( <b>0.00</b> ) | 0.68(0.21)         | 0.68( <b>0.00</b> )  | 0.61  | 0.60(-0.01)         | 0.70(0.16)         | 0.70( <b>0.00</b> ) |
| 5     | 0.50  | 0.50( <b>0.00</b> ) | 0.64(0.28)         | 0.64( <b>0.00</b> )  | 0.46  | 0.44(-0.03)         | 0.65(0.43)         | 0.64(-0.02)         |
| 6     | 0.47  | 0.46(-0.03)         | 0.58(0.23)         | 0.58( <b>0.00</b> )  | 0.31  | 0.31( <b>0.00</b> ) | 0.36(0.17)         | 0.37(0.01)          |
| 7     | 0.41  | 0.39(-0.04)         | 0.62(0.53)         | 0.62( <b>0.00</b> )  | 0.59  | 0.57(-0.02)         | 0.72(0.22)         | 0.72( <b>0.00</b> ) |
| 8     | 0.34  | 0.31(-0.08)         | 0.53(0.55)         | 0.51(-0.03)          | 0.36  | 0.34(-0.06)         | 0.53(0.47)         | 0.53( <b>0.00</b> ) |
| 9     | 0.33  | 0.32(-0.04)         | 0.46(0.38)         | 0.46( <b>0.00</b> )  | 0.47  | 0.46(-0.02)         | 0.54(0.15)         | 0.54( <b>0.00</b> ) |
| 10    | 0.51  | 0.50(-0.02)         | 0.66(0.30)         | 0.65(-0.01)          | 0.36  | 0.32(-0.09)         | 0.47(0.32)         | 0.46(-0.01)         |
| 11    | 0.52  | 0.51(-0.02)         | 0.62(0.19)         | 0.62( <b>0.00</b> )  | 0.41  | 0.40(-0.01)         | 0.54(0.34)         | 0.54( <b>0.00</b> ) |
| 12    | 0.55  | 0.53(-0.03)         | 0.69(0.25)         | 0.68(-0.01)          | 0.58  | 0.57(-0.01)         | 0.65(0.13)         | 0.65( <b>0.00</b> ) |
| 13    | 0.39  | 0.37(-0.05)         | 0.66(0.67)         | 0.65(-0.01)          | 0.42  | 0.40(-0.06)         | 0.62(0.46)         | 0.60(-0.02)         |
| 14    | 0.42  | 0.41(-0.04)         | 0.60(0.41)         | 0.58(-0.03)          | 0.25  | 0.23(-0.07)         | 0.46(0.82)         | 0.45(-0.02)         |
| 15    | 0.48  | 0.48( <b>0.00</b> ) | 0.64(0.34)         | 0.65(0.01)           | 0.55  | 0.54(-0.01)         | 0.68(0.24)         | 0.67(-0.01)         |
| 16    | 0.33  | 0.31(-0.05)         | 0.47(0.43)         | 0.46(-0.01)          | 0.55  | 0.55( <b>0.00</b> ) | 0.64(0.16)         | 0.64( <b>0.00</b> ) |
| 17    | 0.12  | 0.10(-0.14)         | 0.29(1.44)         | 0.29( <b>0.00</b> )  | 0.61  | 0.61( <b>0.00</b> ) | 0.73(0.18)         | 0.73( <b>0.00</b> ) |
| 18    | 0.27  | 0.24(-0.10)         | 0.41(0.54)         | 0.40(-0.02)          | 0.31  | 0.30(-0.04)         | 0.50(0.60)         | 0.50( <b>0.00</b> ) |
| 19    | 0.27  | 0.24(-0.11)         | 0.41(0.51)         | 0.40(-0.03)          | 0.41  | 0.39(-0.03)         | 0.57(0.39)         | 0.57( <b>0.00</b> ) |
| 20    | 0.52  | 0.51(-0.02)         | 0.66(0.27)         | 0.66( <b>0.00</b> )  | 0.54  | 0.53(-0.01)         | 0.69(0.29)         | 0.69( <b>0.00</b> ) |
| 21    | 0.58  | 0.56(-0.02)         | 0.71(0.23)         | 0.70(-0.01)          | 0.33  | 0.33( <b>0.00</b> ) | 0.45(0.34)         | 0.44(-0.01)         |
| 22    | 0.50  | 0.49(-0.01)         | 0.61(0.21)         | 0.60(-0.01)          | 0.59  | 0.58(-0.01)         | 0.68(0.15)         | 0.68( <b>0.00</b> ) |
| 23    | 0.43  | 0.41(-0.04)         | 0.54(0.24)         | 0.53(-0.01)          | 0.37  | 0.37( <b>0.00</b> ) | 0.49(0.32)         | 0.49( <b>0.00</b> ) |
| 24    | 0.16  | 0.13(-0.17)         | 0.45(1.80)         | 0.44(-0.03)          | 0.45  | 0.44(-0.02)         | 0.63(0.39)         | 0.62(-0.01)         |
| 25    | 0.40  | 0.38(-0.05)         | 0.58(0.46)         | 0.57(-0.02)          | 0.48  | 0.48( <b>0.00</b> ) | 0.54(0.12)         | 0.54( <b>0.00</b> ) |
| Mean  | 0.41  | 0.40(-0.03)         | 0.56(0.35)         | 0.56(0.00)           | 0.46  | 0.45(-0.02)         | 0.59(0.27)         | 0.59(0.00)          |

<sup>a</sup> In parentheses is the gain in prediction accuracy with SG-UR over SG-SR; <sup>b</sup> In parentheses is the gain in prediction accuracy with UG-SR over SG-SR;

<sup>c</sup> In parentheses is the gain in prediction accuracy with UG-UR over UG-SR; Bold in parentheses indicates the number is not significant at  $\alpha = 0.05$ .
