# Supplementary material for: Accuracy of Across-Environment Genome-Wide Prediction in Maize Nested Association Mapping Populations
Source: PubMed Central journal article supplement (PMC3564986; doi:10.1534/g3.112.005066), 2013-02-01
Supplement: supp_3.2.263_TableS33.pdf [file supp_3.2.263_TableS33.pdf]

**Table S33 Accuracy of WP prediction for environment E3 with four ME GWP models in CV2**

| PopId | LL    |                    |                    |                     | LW    |                      |                    |                     |
|-------|-------|--------------------|--------------------|---------------------|-------|----------------------|--------------------|---------------------|
|       | SG-SR | SG-UR <sup>a</sup> | UG-SR <sup>b</sup> | UG-UR <sup>c</sup>  | SG-SR | SG-UR <sup>a</sup>   | UG-SR <sup>b</sup> | UG-UR <sup>c</sup>  |
| 1     | 0.51  | 0.50(-0.02)        | 0.65(0.27)         | 0.65( <b>0.00</b> ) | 0.36  | 0.35(-0.03)          | 0.45(0.25)         | 0.45( <b>0.00</b> ) |
| 2     | 0.36  | 0.34(-0.06)        | 0.52(0.46)         | 0.51(-0.03)         | 0.52  | 0.52( <b>0.00</b> )  | 0.65(0.23)         | 0.65( <b>0.00</b> ) |
| 3     | 0.23  | 0.22(-0.04)        | 0.35(0.48)         | 0.35( <b>0.00</b> ) | 0.26  | 0.25(-0.04)          | 0.46(0.75)         | 0.46( <b>0.00</b> ) |
| 4     | 0.51  | 0.49(-0.04)        | 0.61(0.19)         | 0.60(-0.01)         | 0.19  | 0.17(-0.10)          | 0.39(1.01)         | 0.38(-0.01)         |
| 5     | 0.46  | 0.44(-0.03)        | 0.60(0.32)         | 0.60( <b>0.00</b> ) | 0.30  | 0.28(-0.09)          | 0.53(0.76)         | 0.52(-0.02)         |
| 6     | 0.47  | 0.44(-0.06)        | 0.59(0.26)         | 0.59( <b>0.00</b> ) | 0.31  | 0.31( <b>0.00</b> )  | 0.43(0.37)         | 0.43( <b>0.00</b> ) |
| 7     | 0.49  | 0.48(-0.03)        | 0.64(0.30)         | 0.64( <b>0.00</b> ) | 0.42  | 0.41(-0.03)          | 0.59(0.41)         | 0.59( <b>0.00</b> ) |
| 8     | 0.32  | 0.31(-0.04)        | 0.50(0.54)         | 0.50( <b>0.00</b> ) | 0.46  | 0.44(-0.03)          | 0.54(0.18)         | 0.54( <b>0.00</b> ) |
| 9     | 0.42  | 0.40(-0.06)        | 0.54(0.28)         | 0.54( <b>0.00</b> ) | 0.45  | 0.44(-0.02)          | 0.57(0.26)         | 0.57( <b>0.00</b> ) |
| 10    | 0.42  | 0.40(-0.05)        | 0.62(0.47)         | 0.62( <b>0.00</b> ) | 0.55  | 0.54(-0.03)          | 0.63(0.14)         | 0.62(-0.01)         |
| 11    | 0.53  | 0.52(-0.02)        | 0.63(0.20)         | 0.63( <b>0.00</b> ) | 0.38  | 0.38( <b>0.00</b> )  | 0.52(0.37)         | 0.52( <b>0.00</b> ) |
| 12    | 0.42  | 0.39(-0.05)        | 0.56(0.34)         | 0.56( <b>0.00</b> ) | 0.27  | 0.26(-0.05)          | 0.41(0.51)         | 0.41( <b>0.00</b> ) |
| 13    | 0.43  | 0.39(-0.08)        | 0.64(0.50)         | 0.61(-0.04)         | 0.27  | 0.23(-0.13)          | 0.52(0.98)         | 0.51(-0.02)         |
| 14    | 0.33  | 0.31(-0.06)        | 0.48(0.46)         | 0.48( <b>0.00</b> ) | 0.33  | 0.31(-0.06)          | 0.53(0.59)         | 0.53( <b>0.00</b> ) |
| 15    | 0.25  | 0.22(-0.10)        | 0.46(0.83)         | 0.46( <b>0.00</b> ) | 0.39  | 0.39( <b>0.00</b> )  | 0.57(0.46)         | 0.57( <b>0.00</b> ) |
| 16    | 0.33  | 0.30(-0.07)        | 0.43(0.32)         | 0.43( <b>0.00</b> ) | 0.36  | 0.35(-0.02)          | 0.52(0.45)         | 0.52( <b>0.00</b> ) |
| 17    | 0.32  | 0.29(-0.07)        | 0.44(0.40)         | 0.44( <b>0.00</b> ) | 0.37  | 0.36(- <b>0.01</b> ) | 0.54(0.47)         | 0.54( <b>0.00</b> ) |
| 18    | 0.18  | 0.16(-0.11)        | 0.28(0.51)         | 0.28( <b>0.00</b> ) | 0.35  | 0.34(-0.02)          | 0.47(0.35)         | 0.47( <b>0.00</b> ) |
| 19    | 0.46  | 0.44(-0.05)        | 0.58(0.26)         | 0.57(-0.02)         | 0.41  | 0.40(-0.02)          | 0.54(0.31)         | 0.54( <b>0.00</b> ) |
| 20    | 0.32  | 0.29(-0.11)        | 0.50(0.56)         | 0.49(-0.01)         | 0.44  | 0.43(-0.02)          | 0.58(0.31)         | 0.58( <b>0.00</b> ) |
| 21    | 0.47  | 0.45(-0.03)        | 0.63(0.35)         | 0.63( <b>0.00</b> ) | 0.41  | 0.40(-0.01)          | 0.50(0.24)         | 0.50( <b>0.00</b> ) |
| 22    | 0.39  | 0.38(-0.02)        | 0.52(0.34)         | 0.51(-0.01)         | 0.34  | 0.33(-0.03)          | 0.52(0.53)         | 0.52( <b>0.00</b> ) |
| 23    | 0.31  | 0.28(-0.09)        | 0.50(0.60)         | 0.50( <b>0.00</b> ) | 0.40  | 0.40( <b>0.00</b> )  | 0.52(0.30)         | 0.52( <b>0.00</b> ) |
| 24    | 0.26  | 0.23(-0.11)        | 0.43(0.68)         | 0.41(-0.04)         | 0.41  | 0.39(-0.03)          | 0.56(0.38)         | 0.57(0.01)          |
| 25    | 0.36  | 0.32(-0.11)        | 0.52(0.44)         | 0.50(-0.04)         | 0.29  | 0.28(-0.03)          | 0.44(0.52)         | 0.44( <b>0.00</b> ) |
| Mean  | 0.38  | 0.36(-0.06)        | 0.53(0.38)         | 0.52(-0.01)         | 0.37  | 0.36(-0.03)          | 0.52(0.40)         | 0.52(0.00)          |

<sup>a</sup> In parentheses is the gain in prediction accuracy with SG-UR over SG-SR; <sup>b</sup> In parentheses is the gain in prediction accuracy with UG-SR over SG-SR;

<sup>c</sup> In parentheses is the gain in prediction accuracy with UG-UR over UG-SR; Bold in parentheses indicates the number is not significant at  $\alpha = 0.05$ .
