# Supplementary material for: Accuracy of Across-Environment Genome-Wide Prediction in Maize Nested Association Mapping Populations
Source: PubMed Central journal article supplement (PMC3564986; doi:10.1534/g3.112.005066), 2013-02-01
Supplement: supp_3.2.263_TableS34.pdf [file supp_3.2.263_TableS34.pdf]

**Table S34 Accuracy of WP prediction for environment E4 with four ME GWP models in CV2**

| PopId | LL    |                     |                    |                      | LW    |                     |                    |                     |
|-------|-------|---------------------|--------------------|----------------------|-------|---------------------|--------------------|---------------------|
|       | SG-SR | SG-UR <sup>a</sup>  | UG-SR <sup>b</sup> | UG-UR <sup>c</sup>   | SG-SR | SG-UR <sup>a</sup>  | UG-SR <sup>b</sup> | UG-UR <sup>c</sup>  |
| 1     | 0.46  | 0.45(-0.01)         | 0.61(0.33)         | 0.61( <b>0.00</b> )  | 0.51  | 0.50(-0.02)         | 0.63(0.23)         | 0.62(-0.01)         |
| 2     | 0.30  | 0.30( <b>0.00</b> ) | 0.53(0.77)         | 0.52(-0.02)          | 0.46  | 0.45(-0.02)         | 0.62(0.35)         | 0.62( <b>0.00</b> ) |
| 3     | 0.27  | 0.26(-0.03)         | 0.37(0.35)         | 0.36(- <b>0.01</b> ) | 0.41  | 0.40(-0.02)         | 0.62(0.52)         | 0.61(-0.01)         |
| 4     | 0.53  | 0.52(-0.02)         | 0.66(0.23)         | 0.65(-0.01)          | 0.52  | 0.51(-0.02)         | 0.64(0.23)         | 0.63(-0.01)         |
| 5     | 0.37  | 0.37( <b>0.00</b> ) | 0.55(0.47)         | 0.55( <b>0.00</b> )  | 0.44  | 0.43(-0.03)         | 0.63(0.43)         | 0.62(-0.02)         |
| 6     | 0.47  | 0.44(-0.06)         | 0.59(0.27)         | 0.59( <b>0.00</b> )  | 0.31  | 0.30(-0.02)         | 0.46(0.49)         | 0.46( <b>0.00</b> ) |
| 7     | 0.60  | 0.59(-0.01)         | 0.73(0.21)         | 0.73( <b>0.00</b> )  | 0.61  | 0.61( <b>0.00</b> ) | 0.72(0.18)         | 0.72( <b>0.00</b> ) |
| 8     | 0.37  | 0.35(-0.05)         | 0.59(0.60)         | 0.59( <b>0.00</b> )  | 0.40  | 0.37(-0.07)         | 0.56(0.42)         | 0.57(0.02)          |
| 9     | 0.33  | 0.31(-0.06)         | 0.49(0.47)         | 0.48(-0.01)          | 0.48  | 0.47(-0.02)         | 0.52(0.08)         | 0.51(-0.01)         |
| 10    | 0.42  | 0.41(-0.03)         | 0.58(0.39)         | 0.57(-0.01)          | 0.62  | 0.62( <b>0.00</b> ) | 0.73(0.17)         | 0.72(-0.01)         |
| 11    | 0.29  | 0.27(-0.08)         | 0.49(0.67)         | 0.49( <b>0.00</b> )  | 0.46  | 0.45(-0.01)         | 0.60(0.31)         | 0.60( <b>0.00</b> ) |
| 12    | 0.50  | 0.47(-0.05)         | 0.65(0.29)         | 0.64(-0.01)          | 0.57  | 0.56(-0.01)         | 0.66(0.17)         | 0.66( <b>0.00</b> ) |
| 13    | 0.24  | 0.19(-0.18)         | 0.52(1.21)         | 0.54(0.02)           | 0.42  | 0.39(-0.06)         | 0.60(0.44)         | 0.60( <b>0.00</b> ) |
| 14    | 0.35  | 0.32(-0.07)         | 0.54(0.55)         | 0.53(-0.03)          | 0.44  | 0.43(-0.02)         | 0.63(0.44)         | 0.63( <b>0.00</b> ) |
| 15    | 0.37  | 0.35(-0.04)         | 0.58(0.57)         | 0.57(-0.01)          | 0.54  | 0.53(-0.01)         | 0.68(0.26)         | 0.68( <b>0.00</b> ) |
| 16    | 0.21  | 0.19(-0.09)         | 0.42(0.99)         | 0.42( <b>0.00</b> )  | 0.54  | 0.53(-0.00)         | 0.66(0.23)         | 0.66( <b>0.00</b> ) |
| 17    | 0.35  | 0.34(-0.03)         | 0.49(0.38)         | 0.48(-0.02)          | 0.56  | 0.56( <b>0.00</b> ) | 0.70(0.25)         | 0.70( <b>0.00</b> ) |
| 18    | 0.26  | 0.24(-0.08)         | 0.37(0.40)         | 0.37( <b>0.00</b> )  | 0.33  | 0.32(-0.02)         | 0.45(0.39)         | 0.45( <b>0.00</b> ) |
| 19    | 0.28  | 0.25(-0.11)         | 0.45(0.61)         | 0.45( <b>0.00</b> )  | 0.50  | 0.48(-0.03)         | 0.66(0.31)         | 0.66( <b>0.00</b> ) |
| 20    | 0.47  | 0.46(-0.03)         | 0.60(0.27)         | 0.59(-0.01)          | 0.53  | 0.54(0.01)          | 0.66(0.25)         | 0.67(0.01)          |
| 21    | 0.61  | 0.60(-0.02)         | 0.69(0.13)         | 0.69( <b>0.00</b> )  | 0.36  | 0.36( <b>0.00</b> ) | 0.49(0.35)         | 0.49( <b>0.00</b> ) |
| 22    | 0.46  | 0.46( <b>0.00</b> ) | 0.55(0.18)         | 0.55( <b>0.00</b> )  | 0.54  | 0.53(-0.02)         | 0.67(0.26)         | 0.67( <b>0.00</b> ) |
| 23    | 0.39  | 0.37(-0.05)         | 0.50(0.28)         | 0.50( <b>0.00</b> )  | 0.48  | 0.48( <b>0.00</b> ) | 0.60(0.25)         | 0.60( <b>0.00</b> ) |
| 24    | 0.23  | 0.20(-0.14)         | 0.43(0.87)         | 0.41(-0.04)          | 0.46  | 0.45(-0.02)         | 0.62(0.35)         | 0.62( <b>0.00</b> ) |
| 25    | 0.24  | 0.21(-0.14)         | 0.46(0.87)         | 0.45(-0.02)          | 0.49  | 0.48(-0.02)         | 0.54(0.11)         | 0.54( <b>0.00</b> ) |
| Mean  | 0.38  | 0.36(-0.05)         | 0.54(0.43)         | 0.53(-0.01)          | 0.48  | 0.47(-0.02)         | 0.61(0.28)         | 0.61(0.00)          |

<sup>a</sup> In parentheses is the gain in prediction accuracy with SG-UR over SG-SR; <sup>b</sup> In parentheses is the gain in prediction accuracy with UG-SR over SG-SR;

<sup>c</sup> In parentheses is the gain in prediction accuracy with UG-UR over UG-SR; Bold in parentheses indicates the number is not significant at  $\alpha = 0.05$ .
