# Supplementary material for: Accuracy of Across-Environment Genome-Wide Prediction in Maize Nested Association Mapping Populations
Source: PubMed Central journal article supplement (PMC3564986; doi:10.1534/g3.112.005066), 2013-02-01
Supplement: supp_3.2.263_TableS35.pdf [file supp_3.2.263_TableS35.pdf]

**Table S35 Accuracy of AP prediction for environment E1 with four ME GWP models in CV2**

| PopId | LL    |                    |                    |                    | LW    |                    |                    |                    |
|-------|-------|--------------------|--------------------|--------------------|-------|--------------------|--------------------|--------------------|
|       | SG-SR | SG-UR <sup>a</sup> | UG-SR <sup>b</sup> | UG-UR <sup>c</sup> | SG-SR | SG-UR <sup>a</sup> | UG-SR <sup>b</sup> | UG-UR <sup>c</sup> |
| 1     | 0.31  | 0.30(-0.01)        | 0.36(0.16)         | 0.35(-0.01)        | 0.27  | 0.26(-0.01)        | 0.30(0.14)         | 0.30(0.00)         |
| 2     | 0.17  | 0.16(-0.05)        | 0.23(0.36)         | 0.22(-0.04)        | 0.41  | 0.42(0.01)         | 0.44(0.06)         | 0.44(0.00)         |
| 3     | 0.25  | 0.26(0.05)         | 0.27(0.09)         | 0.28(0.03)         | 0.55  | 0.54(-0.01)        | 0.59(0.07)         | 0.59(0.00)         |
| 4     | 0.45  | 0.46(0.02)         | 0.46(0.03)         | 0.48(0.03)         | 0.33  | 0.34(0.03)         | 0.33(0.00)         | 0.33(0.00)         |
| 5     | 0.26  | 0.27(0.07)         | 0.27(0.06)         | 0.28(0.04)         | 0.24  | 0.24(0.00)         | 0.28(0.18)         | 0.28(0.00)         |
| 6     | 0.47  | 0.47(0.00)         | 0.50(0.06)         | 0.51(0.01)         | 0.38  | 0.38(0.00)         | 0.41(0.07)         | 0.41(0.00)         |
| 7     | 0.29  | 0.28(-0.03)        | 0.37(0.25)         | 0.36(-0.02)        | 0.37  | 0.37(0.00)         | 0.45(0.22)         | 0.44(-0.02)        |
| 8     | 0.44  | 0.44(0.00)         | 0.49(0.10)         | 0.49(0.00)         | 0.37  | 0.37(0.00)         | 0.40(0.08)         | 0.40(0.00)         |
| 9     | 0.35  | 0.34(-0.01)        | 0.39(0.12)         | 0.39(0.00)         | 0.16  | 0.17(0.02)         | 0.18(0.11)         | 0.18(0.00)         |
| 10    | 0.39  | 0.39(0.00)         | 0.44(0.12)         | 0.44(0.00)         | 0.44  | 0.43(-0.01)        | 0.50(0.15)         | 0.50(0.00)         |
| 11    | 0.14  | 0.14(0.00)         | 0.20(0.43)         | 0.20(0.00)         | 0.21  | 0.21(0.00)         | 0.24(0.13)         | 0.24(0.00)         |
| 12    | 0.40  | 0.40(0.00)         | 0.46(0.14)         | 0.46(0.00)         | 0.57  | 0.56(-0.01)        | 0.60(0.06)         | 0.60(0.00)         |
| 13    | 0.28  | 0.27(-0.04)        | 0.39(0.36)         | 0.38(-0.02)        | 0.40  | 0.40(0.00)         | 0.44(0.11)         | 0.44(0.00)         |
| 14    | 0.40  | 0.41(0.01)         | 0.44(0.08)         | 0.44(0.00)         | 0.36  | 0.36(0.00)         | 0.42(0.17)         | 0.42(0.00)         |
| 15    | 0.25  | 0.27(0.04)         | 0.27(0.05)         | 0.27(0.00)         | 0.33  | 0.33(0.00)         | 0.34(0.05)         | 0.34(0.00)         |
| 16    | 0.30  | 0.30(0.00)         | 0.34(0.11)         | 0.34(0.00)         | 0.51  | 0.51(0.00)         | 0.53(0.04)         | 0.53(0.00)         |
| 17    | 0.29  | 0.29(0.00)         | 0.33(0.13)         | 0.33(0.00)         | 0.46  | 0.45(-0.01)        | 0.50(0.11)         | 0.51(0.00)         |
| 18    | 0.15  | 0.16(0.05)         | 0.16(0.07)         | 0.17(0.04)         | 0.30  | 0.30(0.00)         | 0.34(0.13)         | 0.33(-0.02)        |
| 19    | 0.32  | 0.32(0.00)         | 0.37(0.14)         | 0.37(0.00)         | 0.26  | 0.26(0.00)         | 0.29(0.15)         | 0.29(0.00)         |
| 20    | 0.42  | 0.41(-0.01)        | 0.45(0.07)         | 0.45(0.00)         | 0.44  | 0.44(0.00)         | 0.47(0.07)         | 0.47(0.00)         |
| 21    | 0.33  | 0.32(-0.04)        | 0.40(0.22)         | 0.39(-0.02)        | 0.32  | 0.31(-0.02)        | 0.36(0.13)         | 0.35(-0.02)        |
| 22    | 0.34  | 0.35(0.03)         | 0.36(0.05)         | 0.36(0.00)         | 0.31  | 0.31(0.00)         | 0.34(0.10)         | 0.34(0.00)         |
| 23    | 0.22  | 0.23(0.03)         | 0.25(0.12)         | 0.25(0.00)         | 0.17  | 0.16(-0.05)        | 0.25(0.47)         | 0.24(-0.03)        |
| 24    | 0.32  | 0.33(0.06)         | 0.31(-0.02)        | 0.32(0.04)         | 0.47  | 0.48(0.01)         | 0.50(0.05)         | 0.50(0.00)         |
| 25    | 0.43  | 0.44(0.01)         | 0.44(0.03)         | 0.46(0.03)         | 0.48  | 0.47(-0.01)        | 0.51(0.07)         | 0.51(0.00)         |
| Mean  | 0.32  | 0.32(0.00)         | 0.36(0.12)         | 0.36(0.00)         | 0.36  | 0.36(0.00)         | 0.40(0.10)         | 0.40(0.00)         |

<sup>a</sup> In parentheses is the gain in prediction accuracy with SG-UR over SG-SR; <sup>b</sup> In parentheses is the gain in prediction accuracy with UG-SR over SG-SR;

<sup>c</sup> In parentheses is the gain in prediction accuracy with UG-UR over UG-SR; Bold in parentheses indicates the number is not significant at  $\alpha = 0.05$ .
