# Supplementary material for: Accuracy of Across-Environment Genome-Wide Prediction in Maize Nested Association Mapping Populations
Source: PubMed Central journal article supplement (PMC3564986; doi:10.1534/g3.112.005066), 2013-02-01
Supplement: supp_3.2.263_TableS38.pdf [file supp_3.2.263_TableS38.pdf]

**Table S38 Accuracy of AP prediction for environment E4 with four ME GWP models in CV2**

| PopId | LL    |                     |                     |                     | LW    |                      |                    |                      |
|-------|-------|---------------------|---------------------|---------------------|-------|----------------------|--------------------|----------------------|
|       | SG-SR | SG-UR <sup>a</sup>  | UG-SR <sup>b</sup>  | UG-UR <sup>c</sup>  | SG-SR | SG-UR <sup>a</sup>   | UG-SR <sup>b</sup> | UG-UR <sup>c</sup>   |
| 1     | 0.30  | 0.31(0.02)          | 0.35(0.16)          | 0.36(0.01)          | 0.34  | 0.34( <b>0.00</b> )  | 0.37(0.10)         | 0.37( <b>0.00</b> )  |
| 2     | 0.25  | 0.26(0.02)          | 0.28(0.11)          | 0.28( <b>0.00</b> ) | 0.44  | 0.44( <b>0.00</b> )  | 0.47(0.08)         | 0.47( <b>0.00</b> )  |
| 3     | 0.26  | 0.26( <b>0.00</b> ) | 0.29(0.14)          | 0.30(0.01)          | 0.40  | 0.41( <b>0.00</b> )  | 0.44(0.09)         | 0.44( <b>0.00</b> )  |
| 4     | 0.45  | 0.45( <b>0.00</b> ) | 0.50(0.11)          | 0.50( <b>0.00</b> ) | 0.31  | 0.31( <b>0.00</b> )  | 0.34(0.11)         | 0.34( <b>0.00</b> )  |
| 5     | 0.39  | 0.40(0.01)          | 0.42(0.06)          | 0.42( <b>0.00</b> ) | 0.35  | 0.35( <b>0.00</b> )  | 0.41(0.17)         | 0.40(-0.01)          |
| 6     | 0.46  | 0.46( <b>0.00</b> ) | 0.52(0.13)          | 0.52( <b>0.00</b> ) | 0.36  | 0.35(- <b>0.01</b> ) | 0.37(0.05)         | 0.37( <b>0.00</b> )  |
| 7     | 0.36  | 0.37(0.02)          | 0.38(0.05)          | 0.39(0.03)          | 0.53  | 0.54(0.01)           | 0.57(0.07)         | 0.57( <b>0.00</b> )  |
| 8     | 0.35  | 0.35( <b>0.00</b> ) | 0.41(0.15)          | 0.40(-0.01)         | 0.40  | 0.40( <b>0.00</b> )  | 0.43(0.08)         | 0.44( <b>0.01</b> )  |
| 9     | 0.34  | 0.35(0.02)          | 0.36(0.05)          | 0.37(0.03)          | 0.42  | 0.42( <b>0.00</b> )  | 0.47(0.11)         | 0.46(- <b>0.01</b> ) |
| 10    | 0.46  | 0.45(-0.02)         | 0.50(0.09)          | 0.51(0.02)          | 0.55  | 0.55( <b>0.00</b> )  | 0.58(0.06)         | 0.58( <b>0.00</b> )  |
| 11    | 0.27  | 0.27( <b>0.00</b> ) | 0.31(0.15)          | 0.32(0.01)          | 0.37  | 0.37( <b>0.00</b> )  | 0.38(0.03)         | 0.38( <b>0.00</b> )  |
| 12    | 0.34  | 0.32(-0.05)         | 0.42(0.25)          | 0.41(-0.02)         | 0.58  | 0.58( <b>0.00</b> )  | 0.60(0.04)         | 0.60( <b>0.00</b> )  |
| 13    | 0.16  | 0.16( <b>0.00</b> ) | 0.22(0.37)          | 0.21(-0.03)         | 0.32  | 0.31(-0.04)          | 0.39(0.20)         | 0.38(-0.01)          |
| 14    | 0.35  | 0.36(0.02)          | 0.38(0.09)          | 0.38( <b>0.00</b> ) | 0.35  | 0.35( <b>0.00</b> )  | 0.38(0.10)         | 0.38( <b>0.00</b> )  |
| 15    | 0.25  | 0.25( <b>0.00</b> ) | 0.29(0.19)          | 0.30(0.02)          | 0.61  | 0.60(- <b>0.01</b> ) | 0.63(0.05)         | 0.63( <b>0.00</b> )  |
| 16    | 0.25  | 0.25( <b>0.00</b> ) | 0.30(0.21)          | 0.30( <b>0.00</b> ) | 0.58  | 0.57(- <b>0.01</b> ) | 0.60(0.04)         | 0.60( <b>0.00</b> )  |
| 17    | 0.25  | 0.25( <b>0.00</b> ) | 0.27(0.09)          | 0.27( <b>0.00</b> ) | 0.55  | 0.56(0.01)           | 0.57(0.03)         | 0.57( <b>0.00</b> )  |
| 18    | 0.16  | 0.16( <b>0.00</b> ) | 0.18(0.12)          | 0.18( <b>0.00</b> ) | 0.41  | 0.40(- <b>0.01</b> ) | 0.41(0.02)         | 0.42(0.01)           |
| 19    | 0.21  | 0.21( <b>0.00</b> ) | 0.24(0.18)          | 0.25(0.01)          | 0.38  | 0.38( <b>0.00</b> )  | 0.40(0.08)         | 0.41(0.01)           |
| 20    | 0.42  | 0.42( <b>0.00</b> ) | 0.46(0.08)          | 0.46( <b>0.00</b> ) | 0.52  | 0.52( <b>0.00</b> )  | 0.56(0.07)         | 0.56( <b>0.00</b> )  |
| 21    | 0.52  | 0.53(0.01)          | 0.54(0.03)          | 0.55(0.01)          | 0.41  | 0.39(-0.03)          | 0.46(0.14)         | 0.45(-0.02)          |
| 22    | 0.29  | 0.30(0.04)          | 0.30(0.05)          | 0.31(0.03)          | 0.42  | 0.43(0.02)           | 0.45(0.06)         | 0.45( <b>0.00</b> )  |
| 23    | 0.14  | 0.15(0.04)          | 0.17(0.19)          | 0.17( <b>0.00</b> ) | 0.32  | 0.32( <b>0.00</b> )  | 0.35(0.08)         | 0.35( <b>0.00</b> )  |
| 24    | 0.28  | 0.29(0.04)          | 0.28( <b>0.00</b> ) | 0.29(0.04)          | 0.50  | 0.50( <b>0.00</b> )  | 0.52(0.05)         | 0.52( <b>0.00</b> )  |
| 25    | 0.28  | 0.27(-0.04)         | 0.34(0.21)          | 0.33(-0.01)         | 0.42  | 0.43(0.02)           | 0.43(0.02)         | 0.44(0.02)           |
| Mean  | 0.31  | 0.31(0.00)          | 0.35(0.12)          | 0.35(0.00)          | 0.43  | 0.43(0.00)           | 0.46(0.07)         | 0.46(0.00)           |

<sup>a</sup> In parentheses is the gain in prediction accuracy with SG-UR over SG-SR; <sup>b</sup> In parentheses is the gain in prediction accuracy with UG-SR over SG-SR;

<sup>c</sup> In parentheses is the gain in prediction accuracy with UG-UR over UG-SR; Bold in parentheses indicates the number is not significant at  $\alpha = 0.05$ .
